# Supplementary material for: Deficiency of Schnurri-2, an MHC Enhancer Binding Protein, Induces Mild Chronic Inflammation in the Brain and Confers Molecular, Neuronal, and Behavioral Phenotypes Related to Schizophrenia
Source: PubMed Central journal article supplement — Neuropsychopharmacology. 2013 Mar 6;38(8):1409–25. doi: 10.1038/npp.2013.38 (PMC3682135; doi:10.1038/npp.2013.38), 2013-03-06

# Supplementary Figure 1

**a**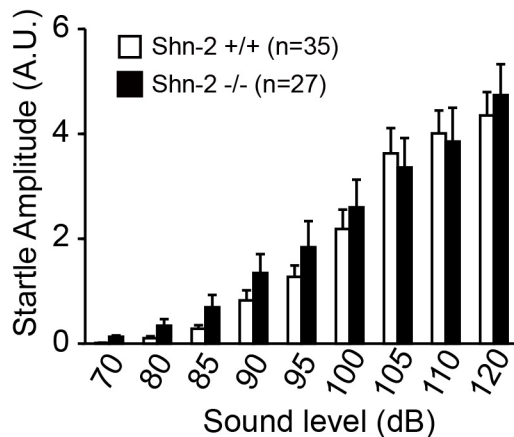**b**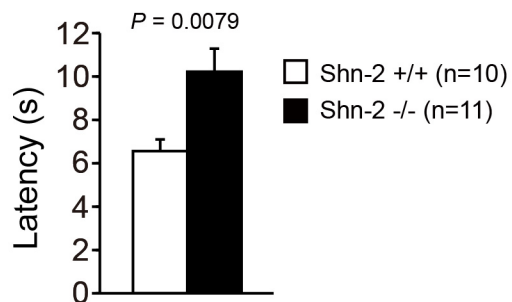**c**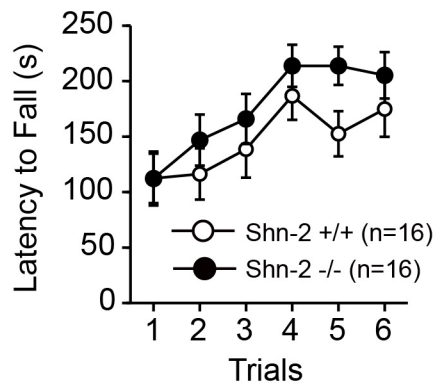**d**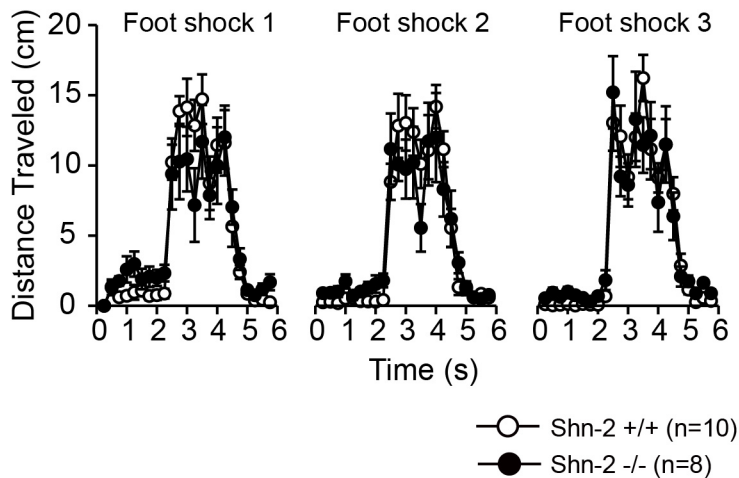

# Supplementary Figure 2

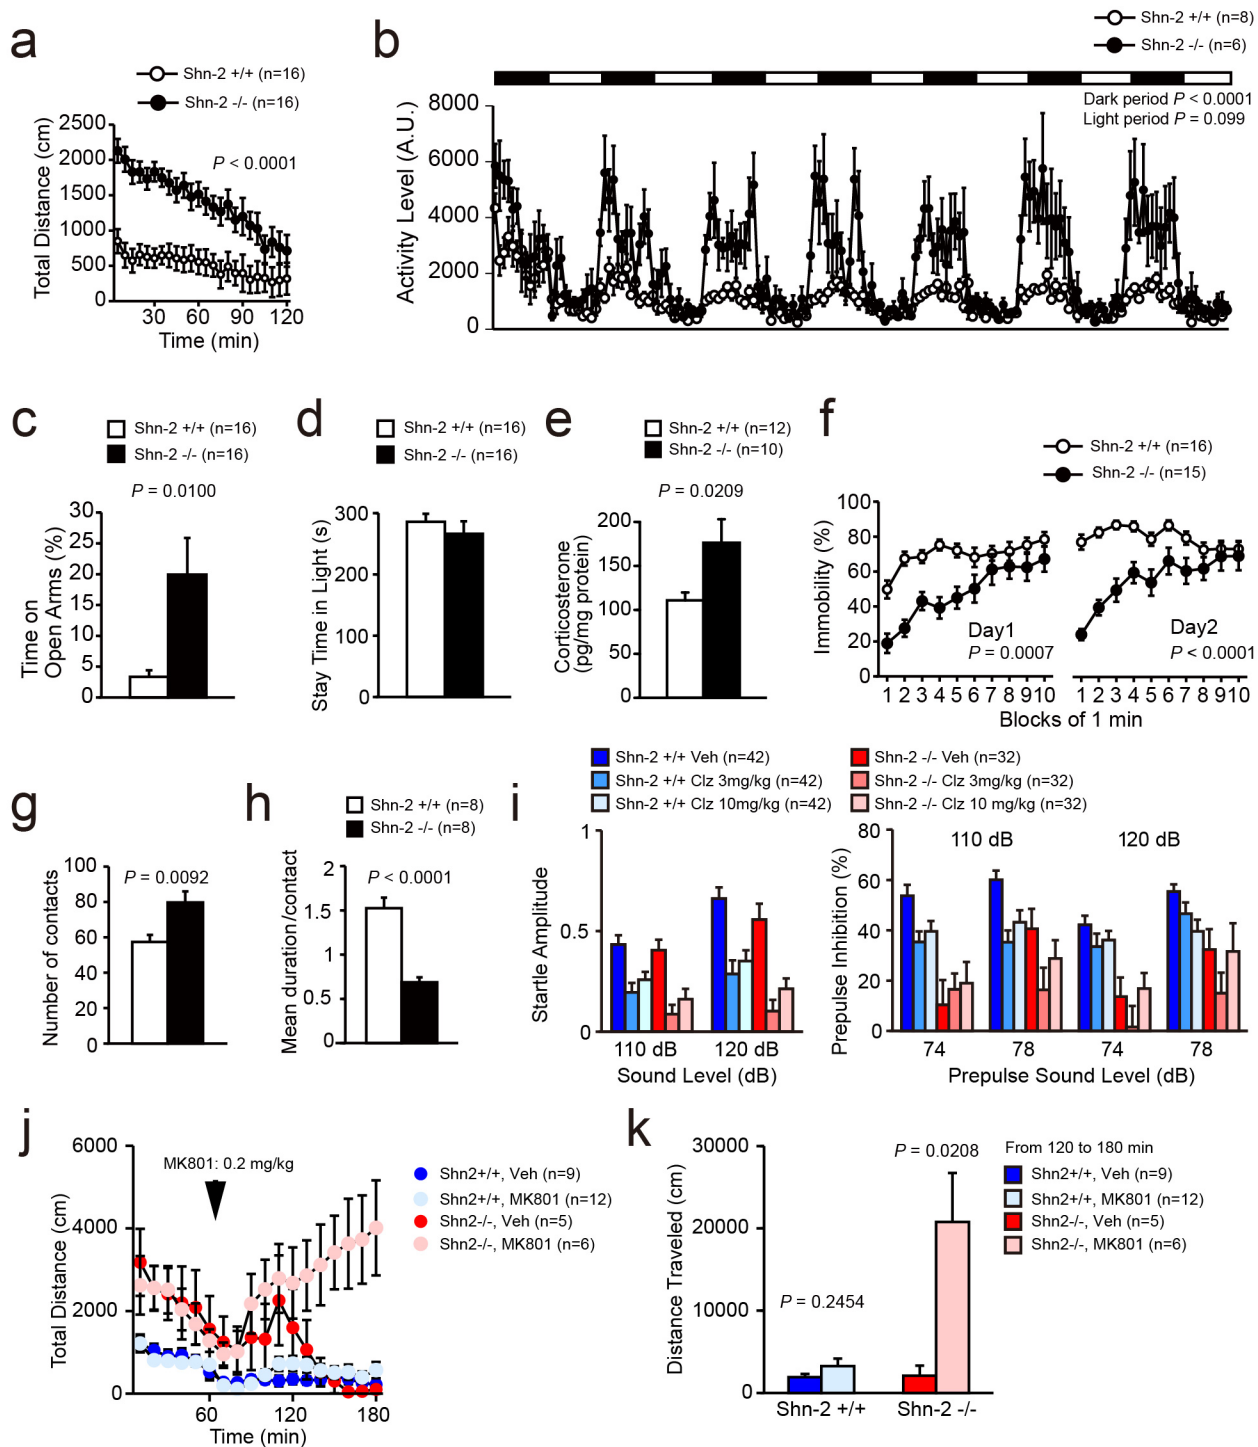

Supplementary Figure 3

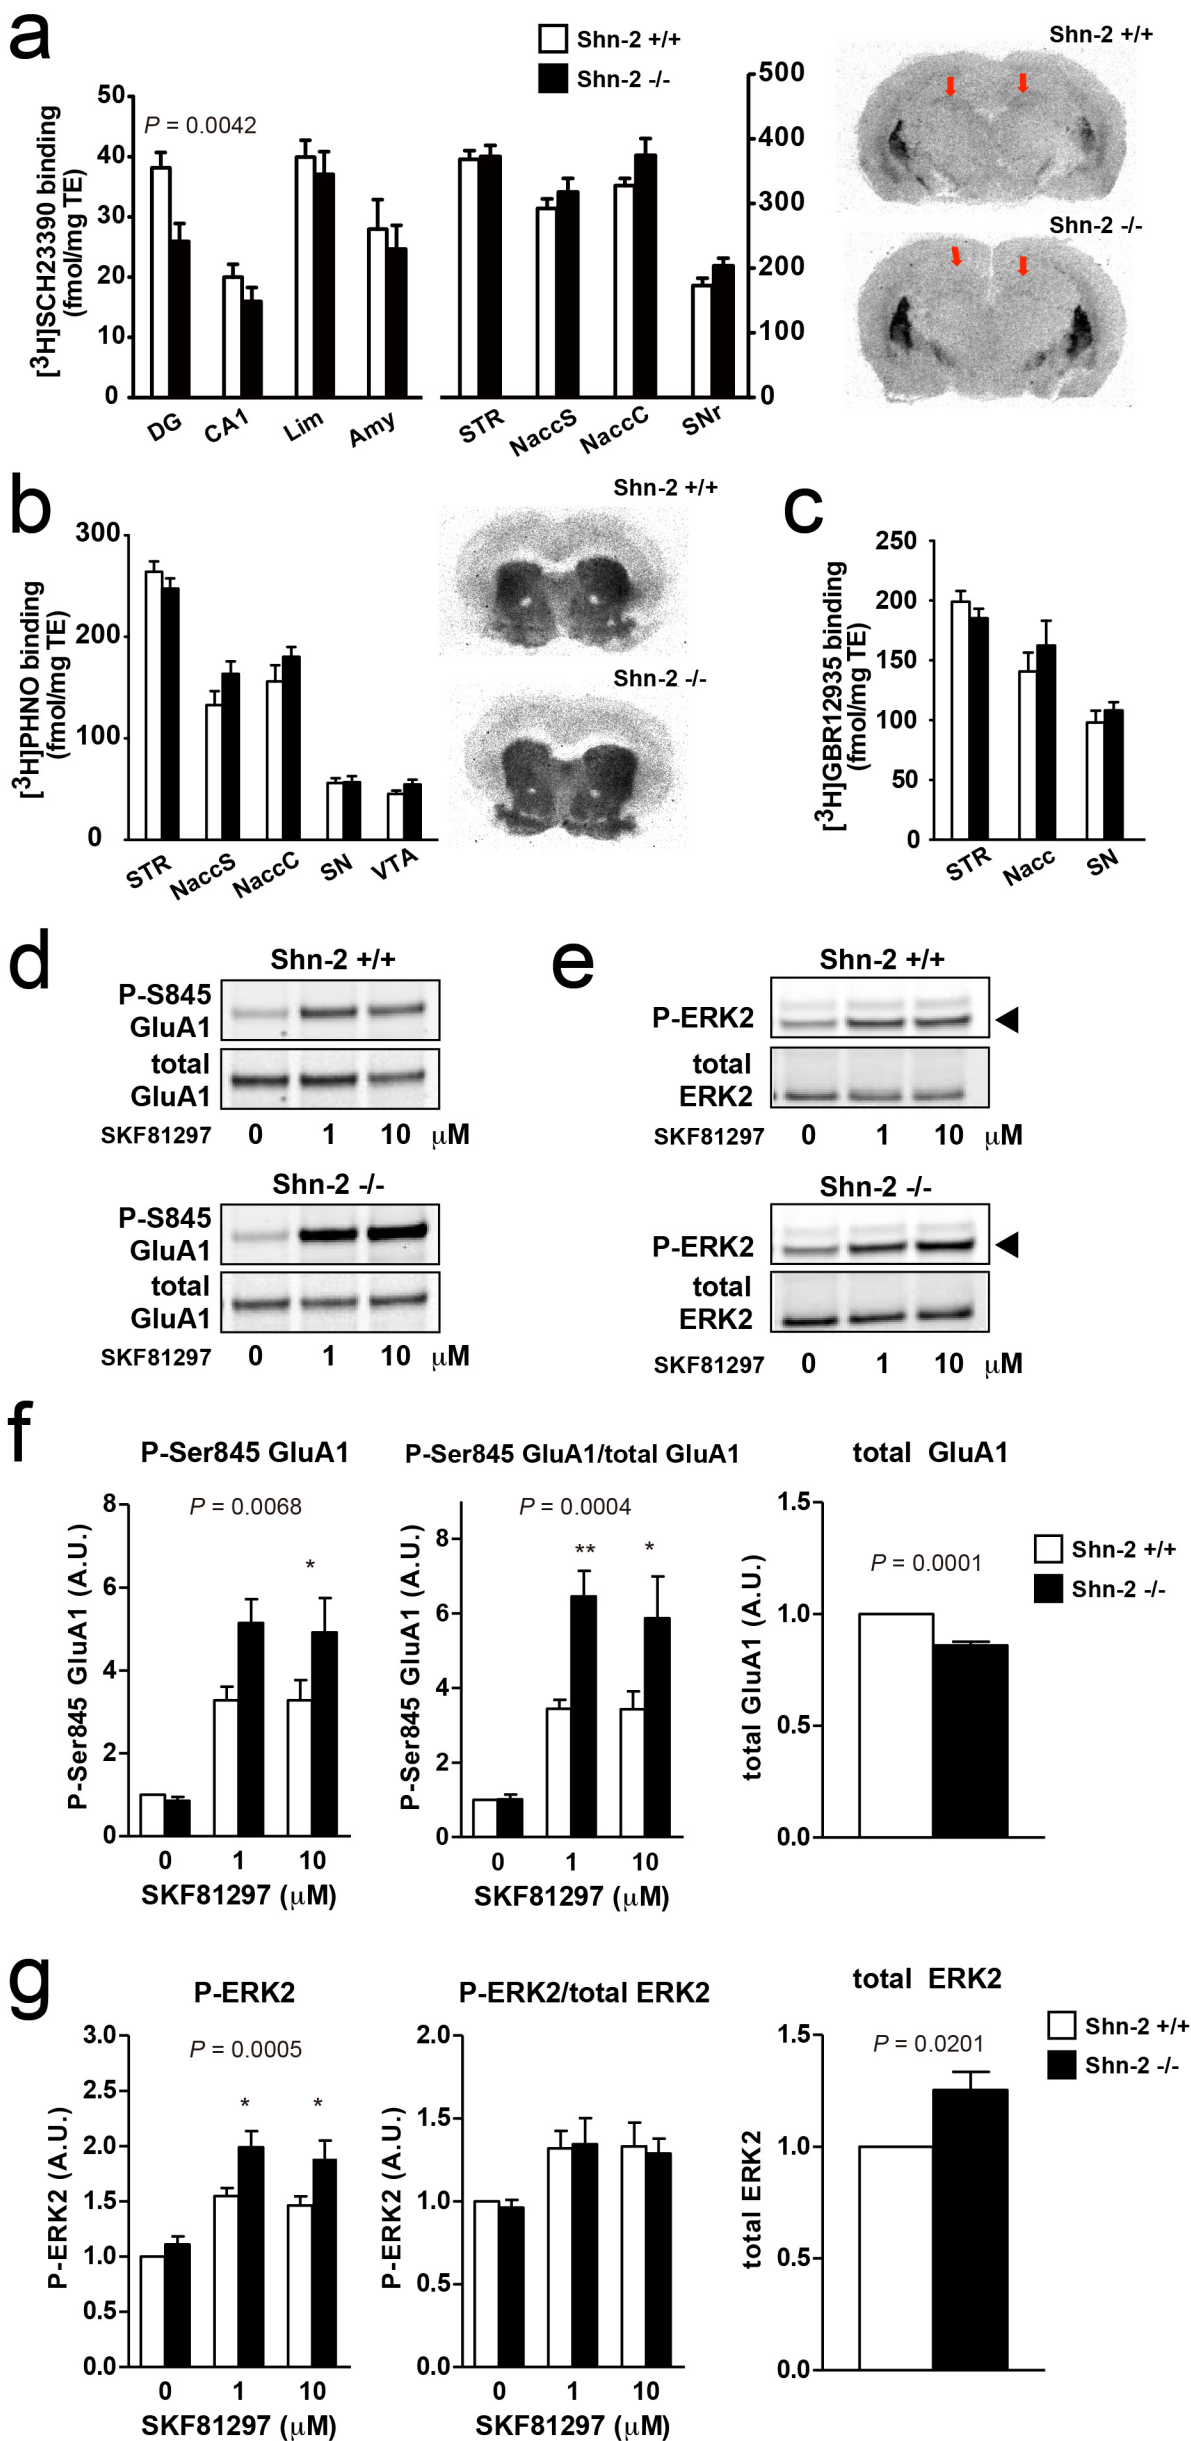

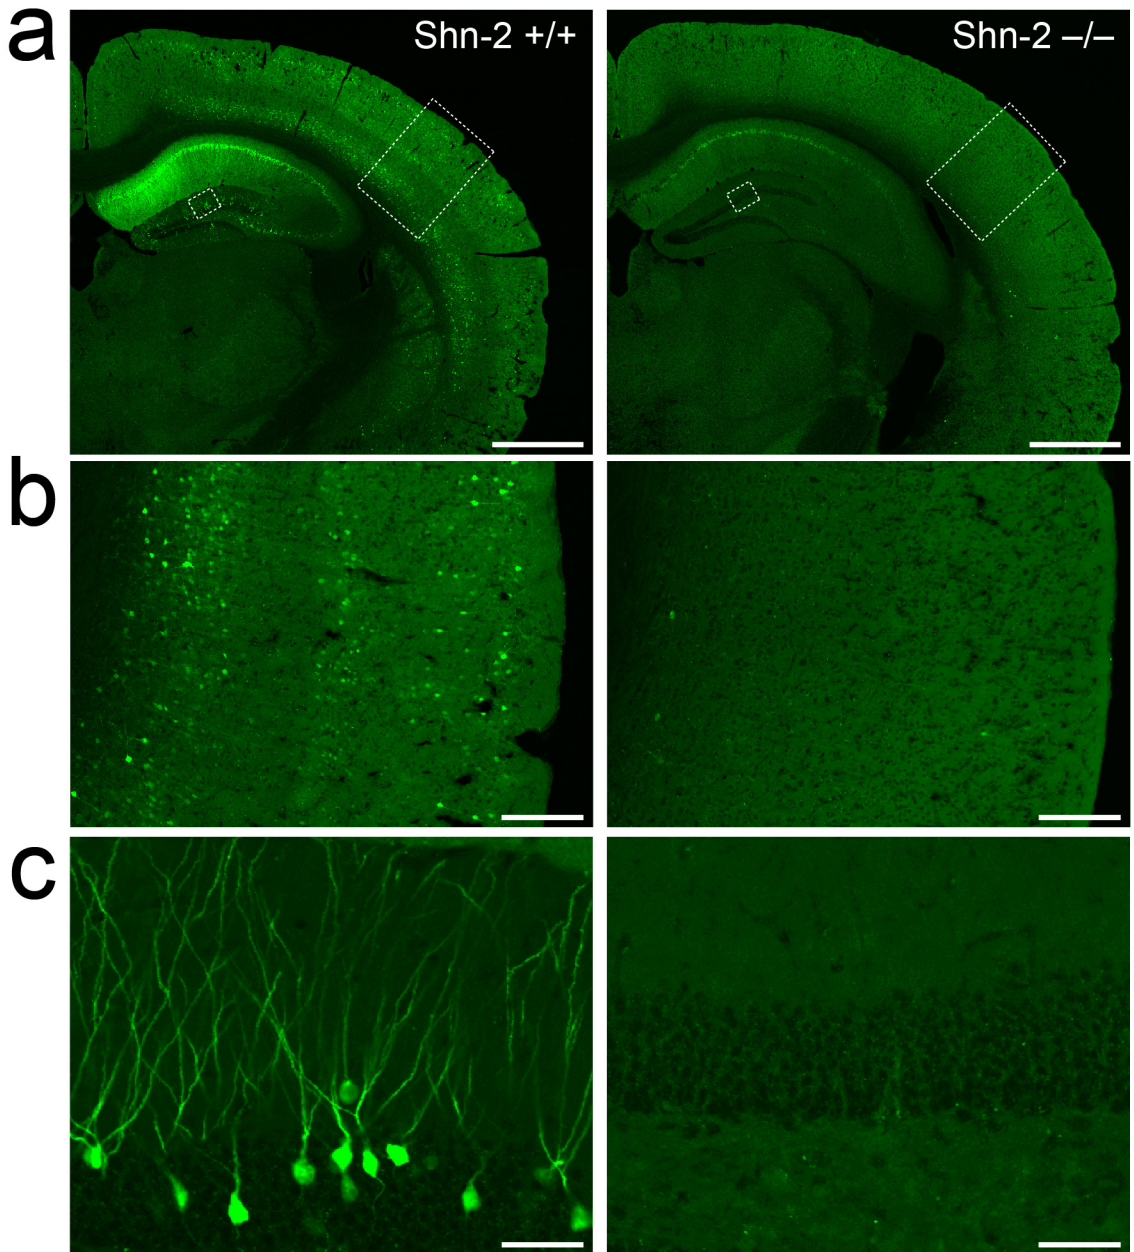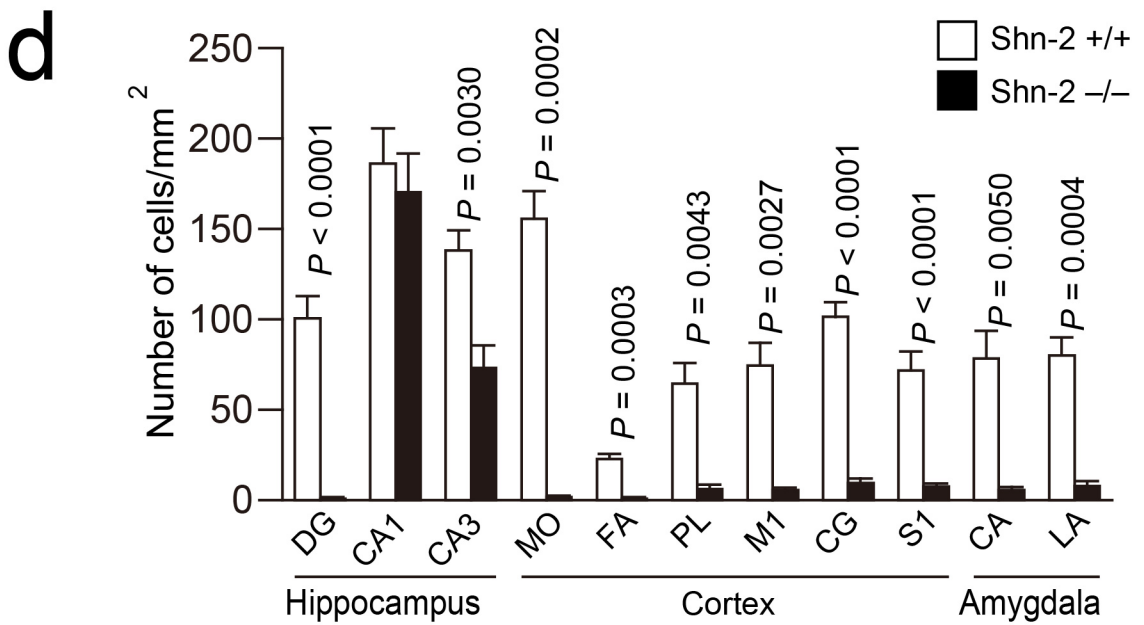

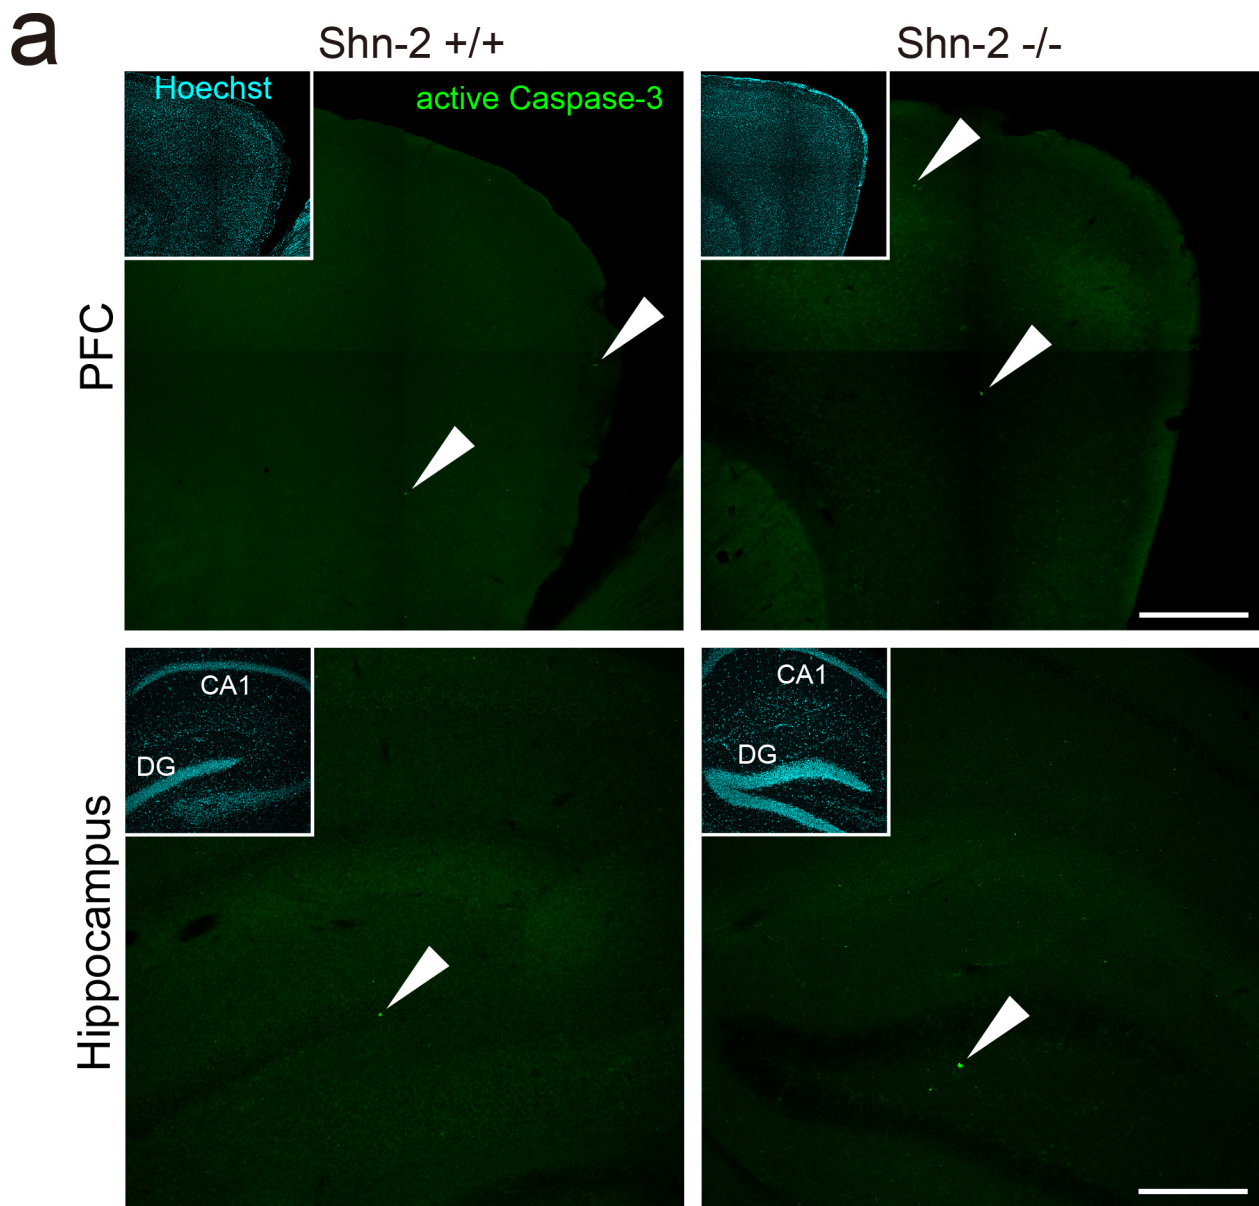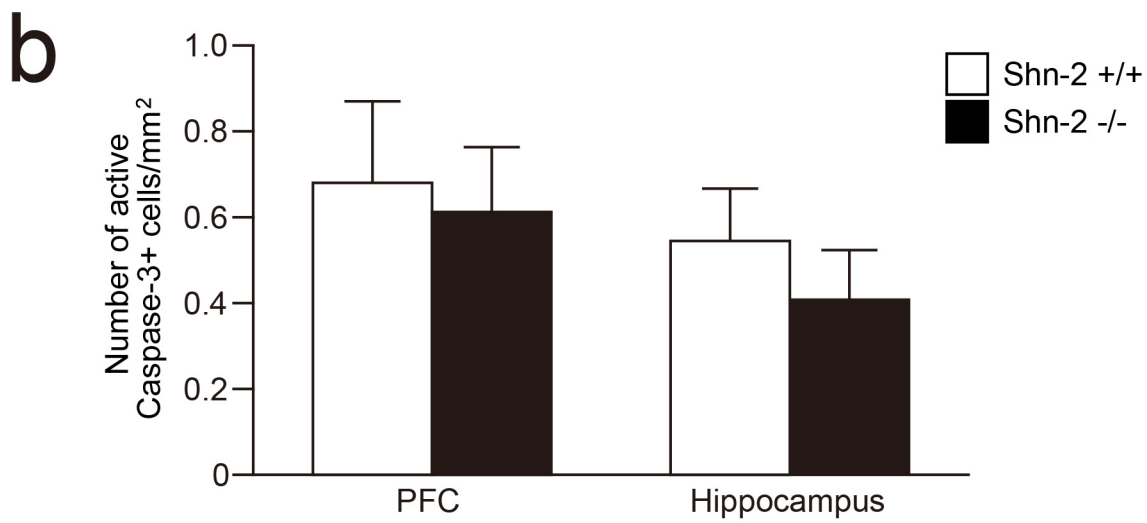

# Supplementary Figure 6

Shn-2 +/+

Shn-2 -/-

DG

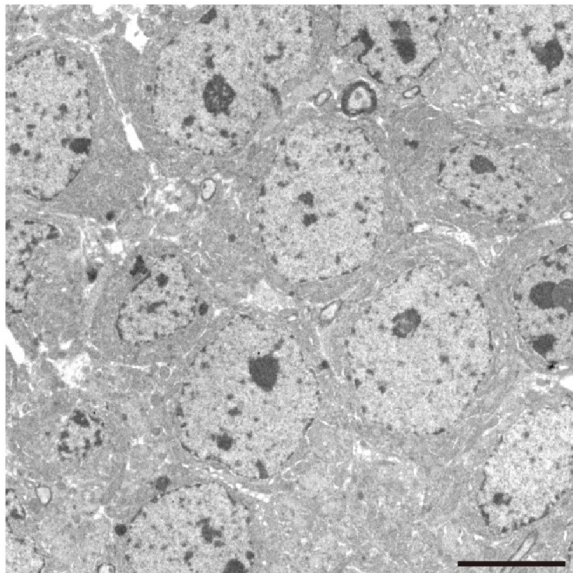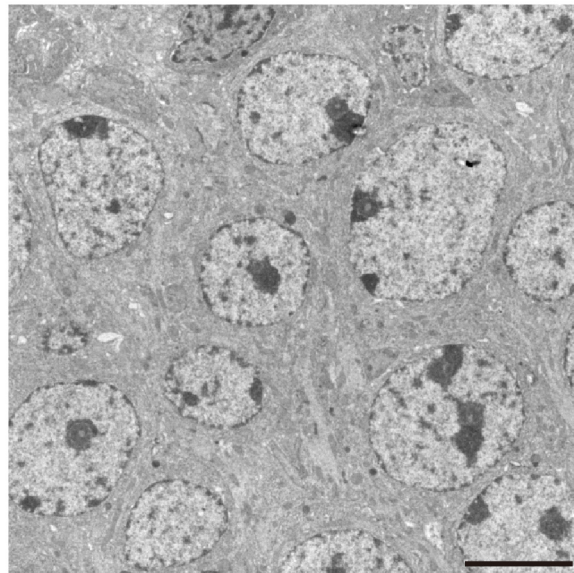

CA3

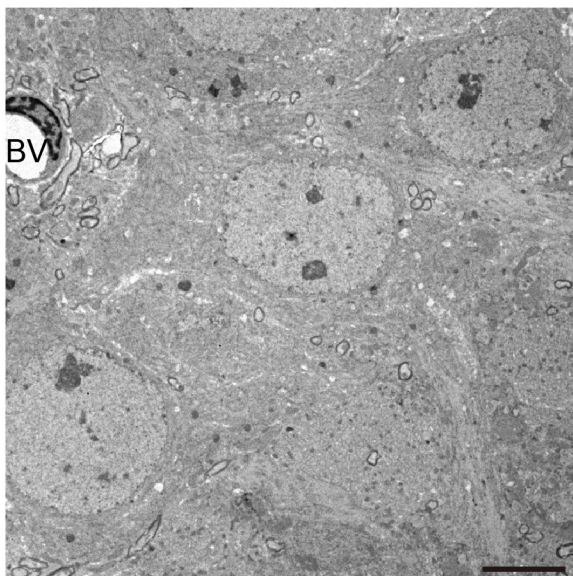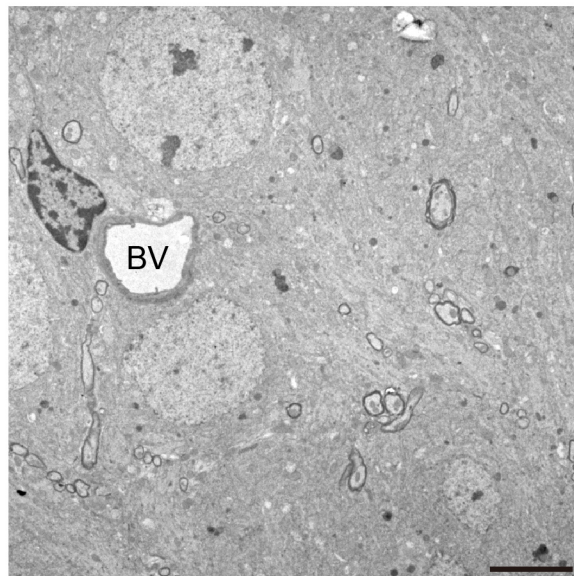

# Supplementary Figure 7

## a

Shn-2  $+/+$

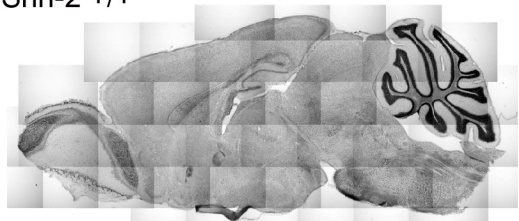

Shn-2  $-/-$

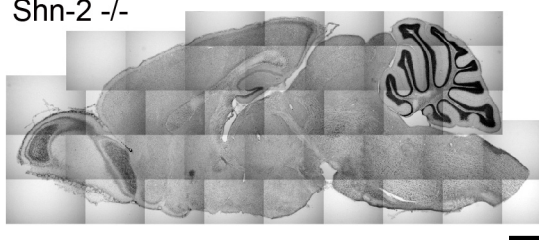

## b

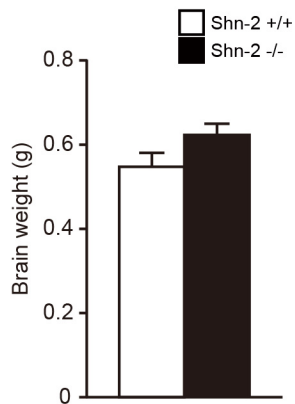

## c

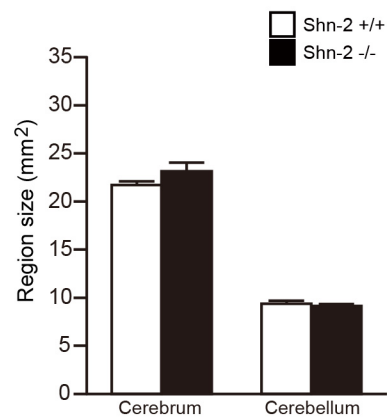

## d

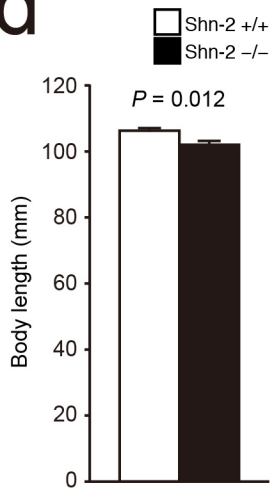

## e

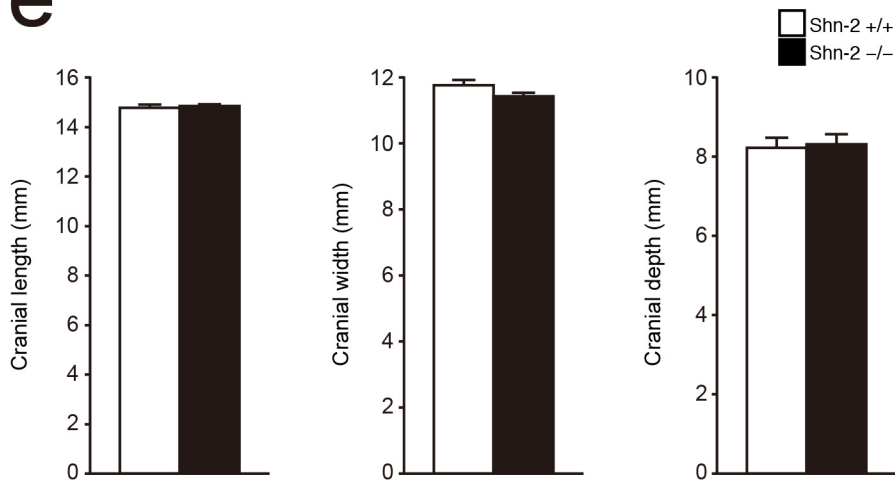

# Supplementary Figure 8

## a

### PSA-NCAM

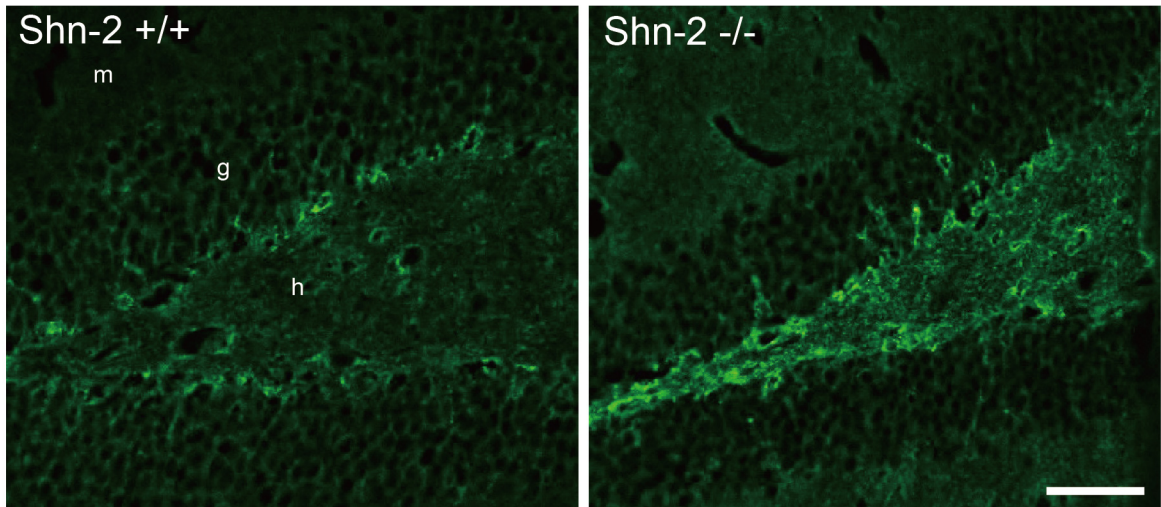

## b

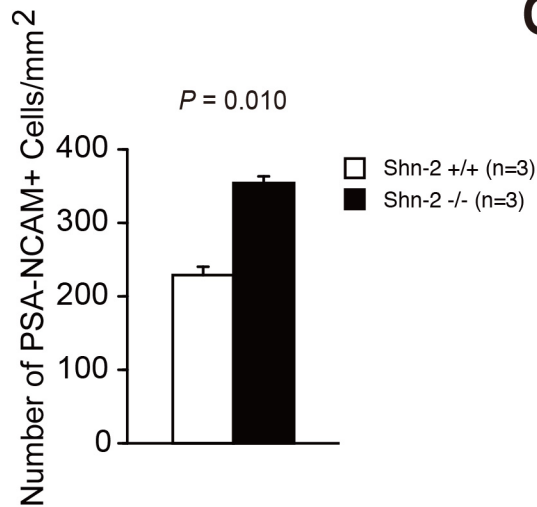

## c

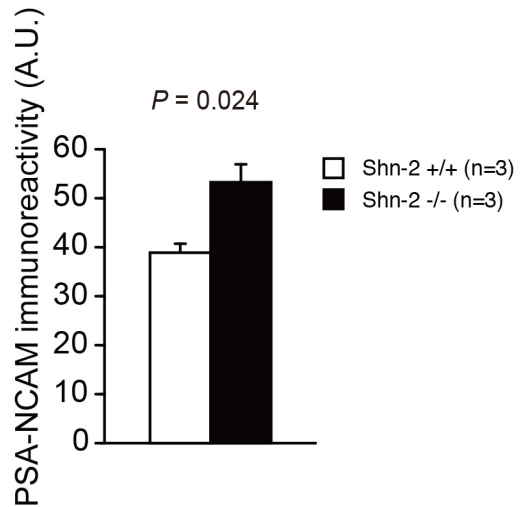



# Supplementary Figure 9

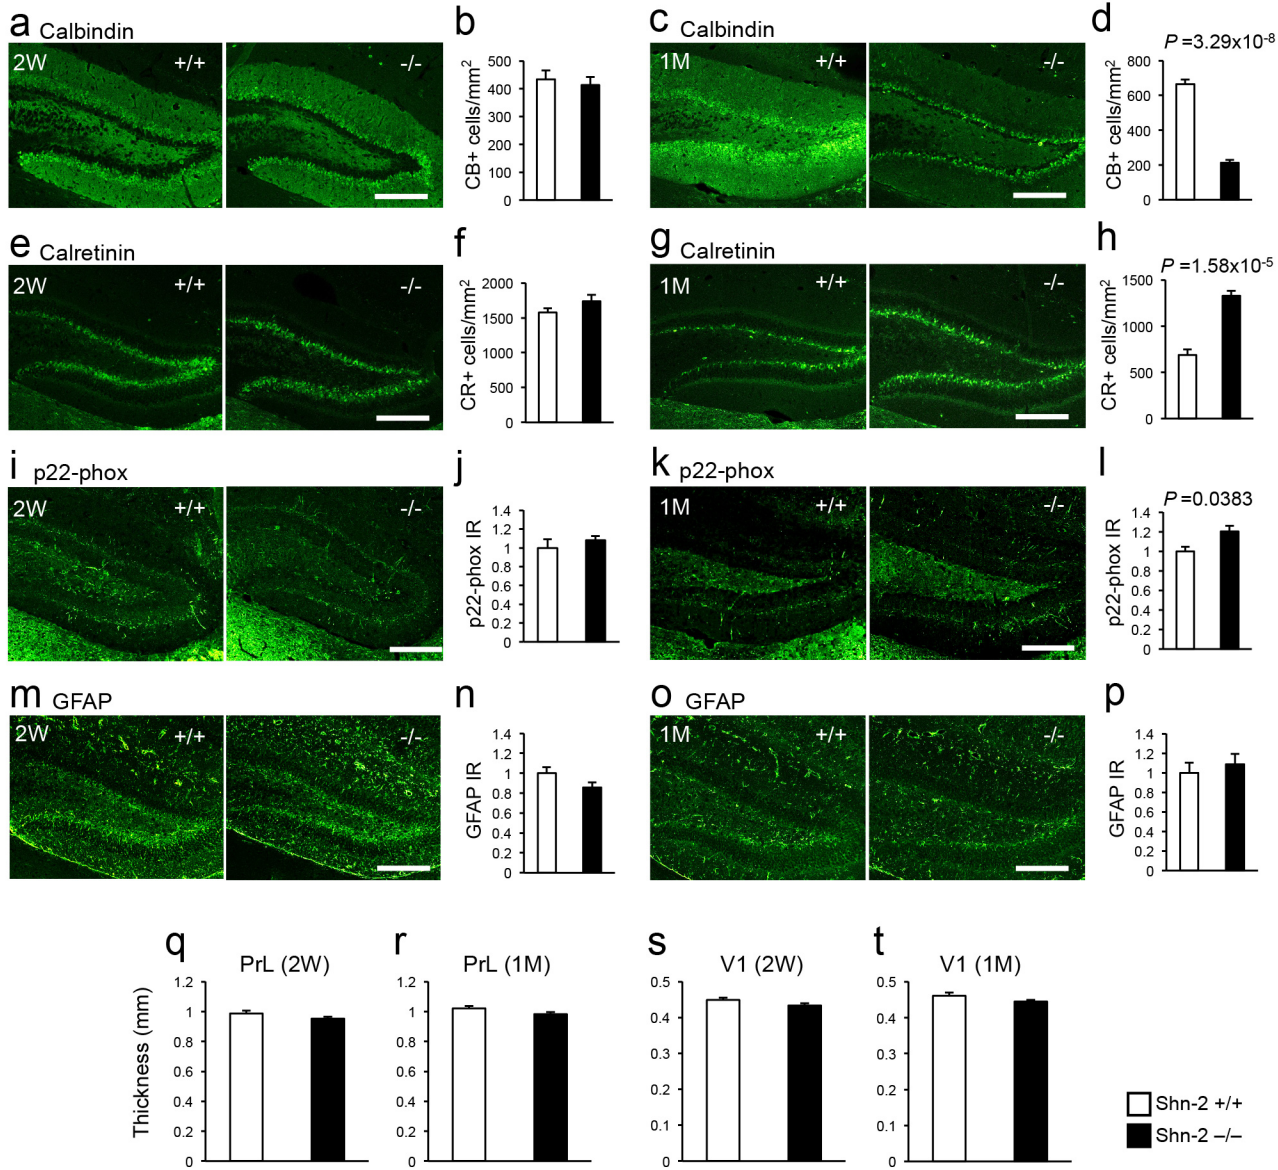

**a**

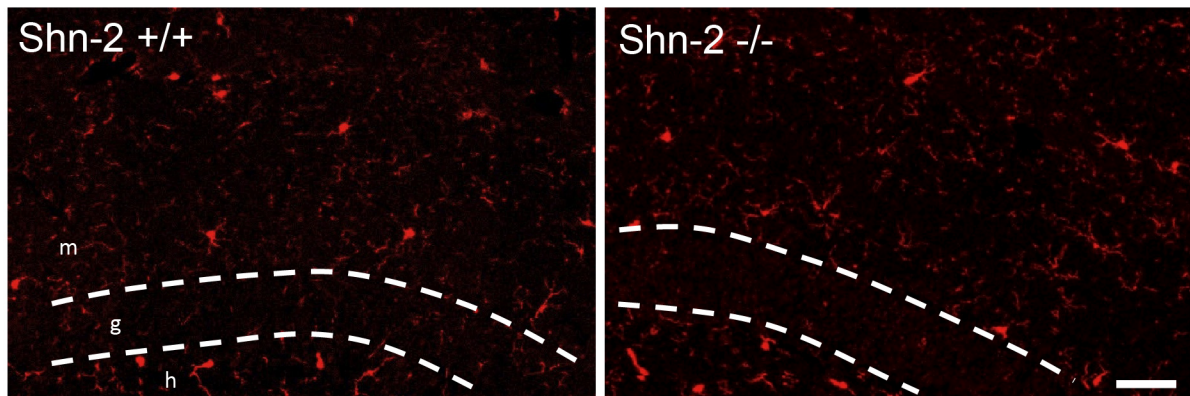

**b**

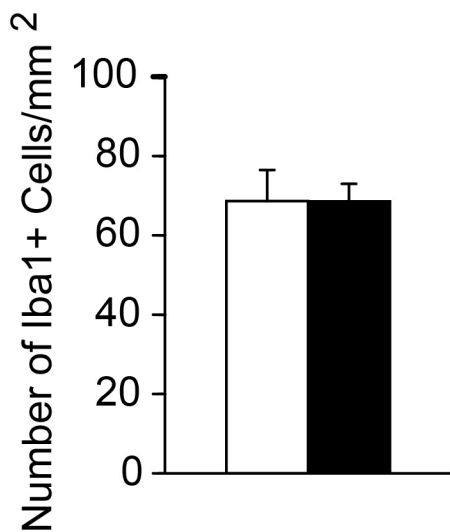

**c**

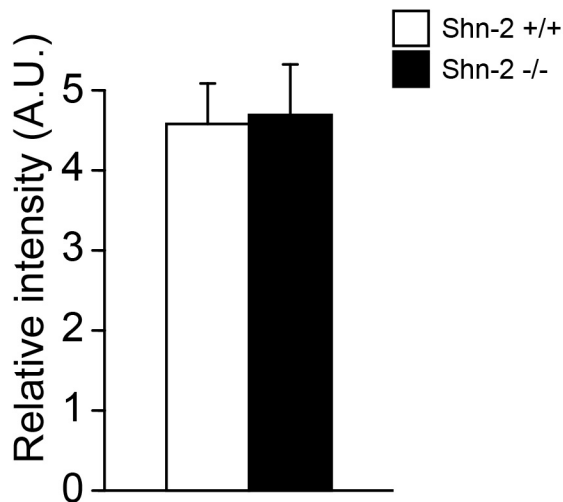

# Supplementary Figure 11

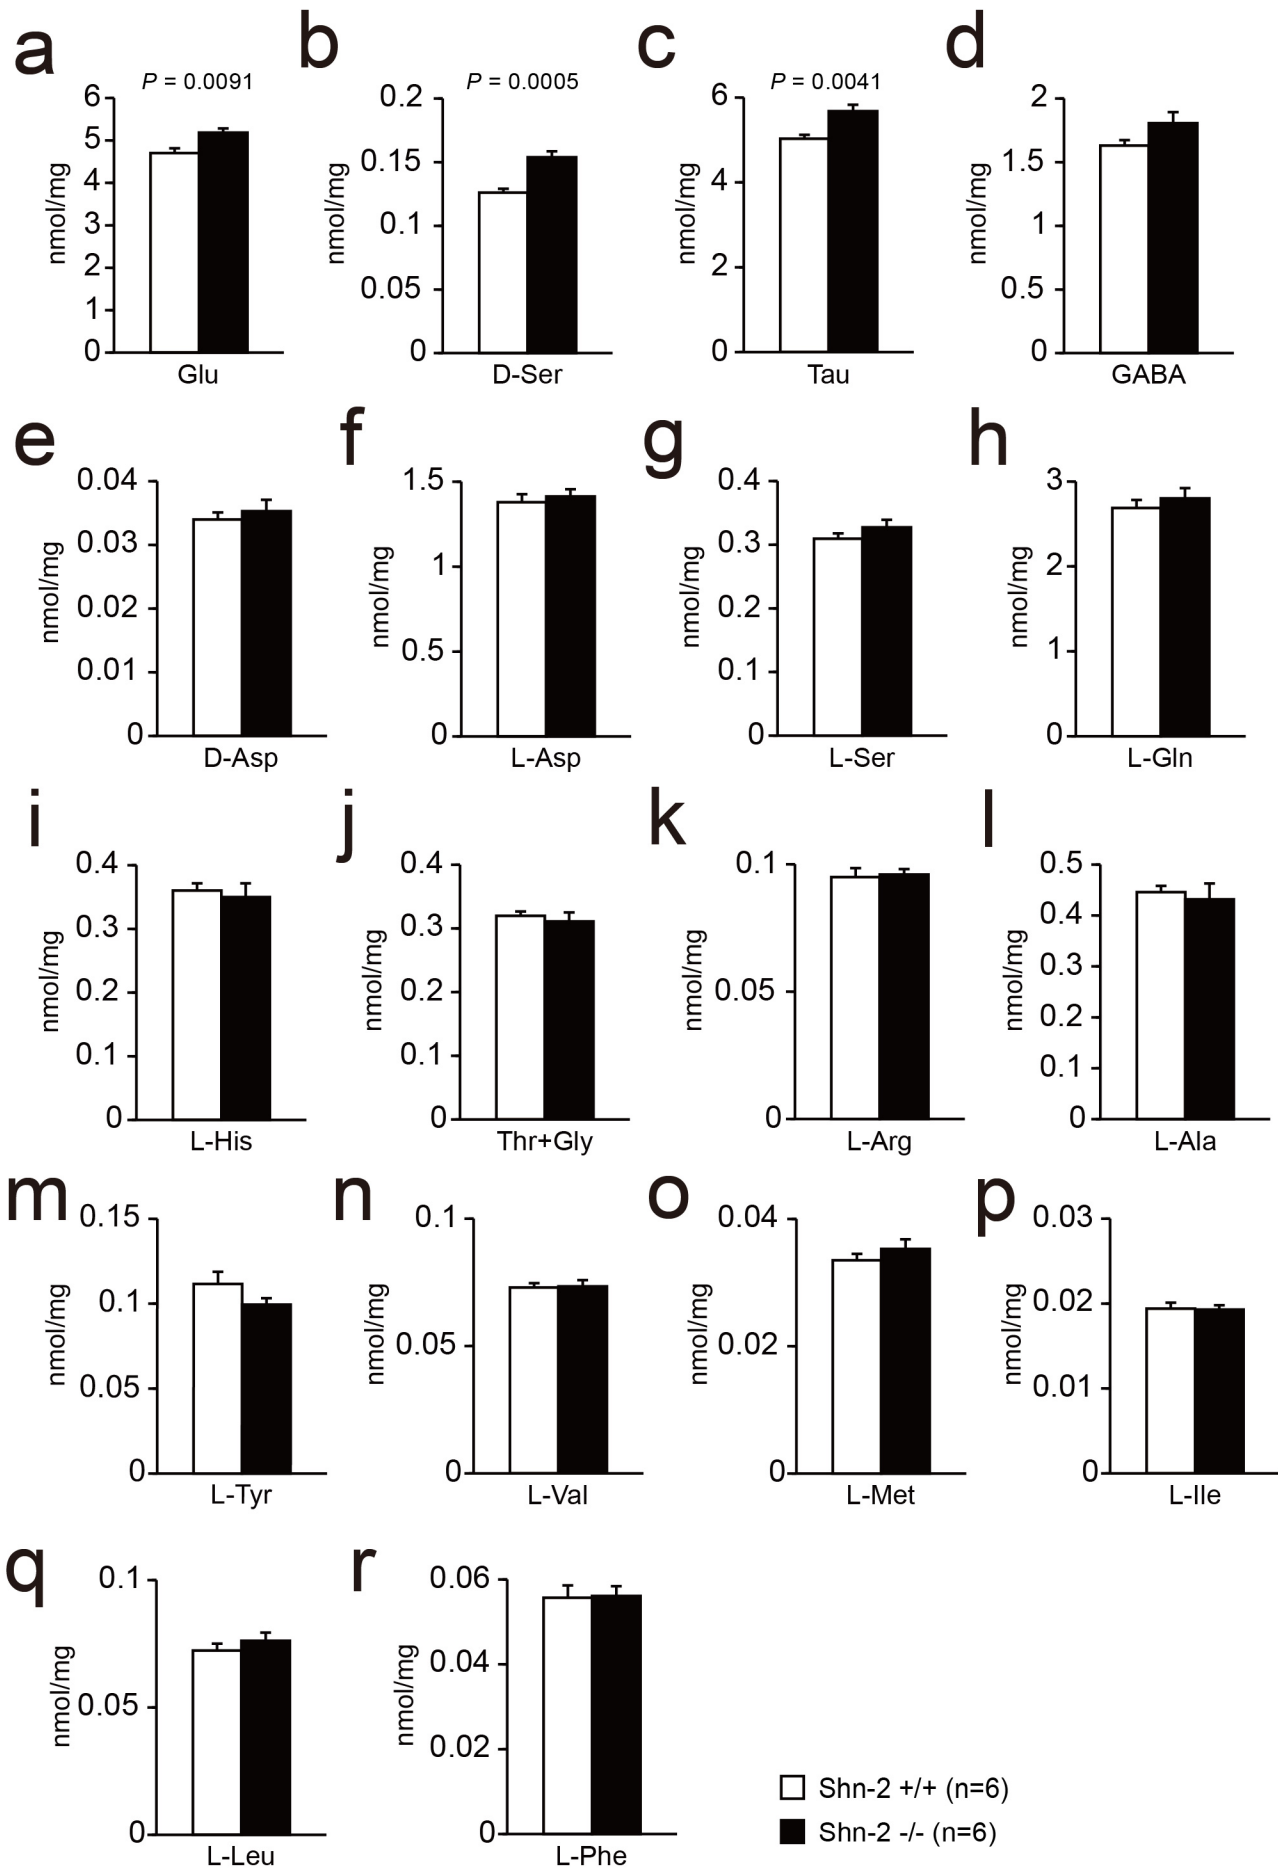

Supplement: npp201338x13.pdf [file npp201338x13.pdf]
