# Supplementary material for: Deficiency of Schnurri-2, an MHC Enhancer Binding Protein, Induces Mild Chronic Inflammation in the Brain and Confers Molecular, Neuronal, and Behavioral Phenotypes Related to Schizophrenia
Source: PubMed Central journal article supplement — Neuropsychopharmacology. 2013 Mar 6;38(8):1409–25. doi: 10.1038/npp.2013.38 (PMC3682135; doi:10.1038/npp.2013.38), 2013-03-06
Supplement: npp201338x2.pdf [file npp201338x2.pdf]

Supplementary Table 2. Genes differentially expressed in both the medial prefrontal cortex (mPFC) of Shn-2 KO mice and Brodmann area (BA) 10 of schizophrenia postmortem brains.

| Bioset Rank in schizophrenia | Symbol    | Probe ID     | PFC in Shn-2 KO |         | BA10 in schizophrenia <sup>1</sup> |             | Association/linkage study <sup>*1</sup> | Other postmortem brain studies <sup>*1, 2</sup> | Neuron from iPS cell <sup>5</sup> | Notes                                                                                                               |
|------------------------------|-----------|--------------|-----------------|---------|------------------------------------|-------------|-----------------------------------------|-------------------------------------------------|-----------------------------------|---------------------------------------------------------------------------------------------------------------------|
|                              |           |              | Fold change     | P value | Probe ID                           | Fold change |                                         |                                                 |                                   |                                                                                                                     |
| 2                            | Serpina3n | 1419100_at   | 1.54            | 3.6E-03 | 202376_at                          | 2.85        |                                         | ↑ (2-4)                                         | ↓                                 | inflammatory response                                                                                               |
| 4                            | C1qb      | 1437726_x_at | 1.37            | 8.0E-03 | 202953_at                          | 2.38        | (6)                                     | ↑ (7)                                           |                                   | inflammatory response                                                                                               |
| 4                            | C1qb      | 1417063_at   | 1.30            | 7.2E-03 |                                    |             |                                         |                                                 |                                   |                                                                                                                     |
| 4                            | C1qb      | 1434366_x_at | 1.27            | 1.2E-02 |                                    |             |                                         |                                                 |                                   |                                                                                                                     |
| 8                            | C1qc      | 1449401_at   | 1.39            | 4.0E-04 | 225353_s_at                        | 2.20        |                                         |                                                 |                                   | inflammatory response                                                                                               |
| 17                           | C10orf10  | 1433837_at   | 1.25            | 4.8E-02 | 209183_s_at                        | 2.01        |                                         | ↑ (7)                                           |                                   | mitochondrion                                                                                                       |
| 22                           | Rgs4      | 1416286_at   | -1.25           | 2.0E-02 | 204338_s_at                        | -1.96       | (8, 9)                                  | ↓ (4, 10-13)                                    |                                   | calmodulin binding, regulating the duration of postsynaptic signaling for G-coupled neurotransmitter receptors (14) |
| 34                           | Ifitm2    | 1417460_at   | 1.31            | 2.6E-02 | 201315_x_at                        | 1.82        |                                         | ↑ (2, 3, 10)                                    | ↑                                 | interferon signaling, immune response                                                                               |
| 37                           | C1qa      | 1417381_at   | 1.31            | 1.9E-03 | 218232_at                          | 1.78        | (6)                                     | ↑ (7)                                           |                                   | inflammatory response                                                                                               |
| 46                           | Myt1l     | 1439702_at   | 1.22            | 3.2E-02 | 1554633_a_at                       | -1.70       | (15)                                    | ↓ (4)                                           | ↑                                 | cell differentiation                                                                                                |
| 49                           | Tac1      | 1416783_at   | -1.44           | 1.2E-02 | 206552_s_at                        | -1.68       | (16, 17)                                | ↓ (4, 11)                                       |                                   | inflammatory response                                                                                               |
| 54                           | Cebpd     | 1423233_at   | 1.40            | 3.5E-02 | 203973_s_at                        | 1.67        | (18)                                    | ↑ (4, 10, 19)                                   |                                   | bZIP transcription factor                                                                                           |
| 57                           | Frzb      | 1448424_at   | -2.30           | 3.2E-02 | 203697_at                          | -1.65       |                                         |                                                 | ↑                                 | Wnt-protein binding                                                                                                 |
| 70                           | Ifitm1    | 1424254_at   | 1.53            | 1.0E-02 | 201601_x_at                        | 1.62        |                                         | ↑ (3, 10)                                       | ↑                                 | interferon signaling                                                                                                |
| 73                           | Tgfbr1    | 1420895_at   | 1.20            | 1.7E-02 | 224793_s_at                        | 1.61        | (16)                                    | ↑ (7, 20)                                       |                                   | immune system process                                                                                               |
| 84                           | Frzb      |              |                 |         | 203698_s_at                        | -1.59       |                                         |                                                 | ↑                                 | Wnt-protein binding                                                                                                 |
| 87                           | Ddit4     | 1428306_at   | 1.25            | 4.5E-03 | 202887_s_at                        | 1.58        |                                         | ↑ (4, 11)                                       | ↑                                 | response to hypoxia                                                                                                 |
| 87                           | Ifitm1    |              |                 |         | 214022_s_at                        | 1.58        |                                         | ↑ (3, 10)                                       | ↑                                 | interferon signaling                                                                                                |
| 96                           | Cbln4     | 1433607_at   | -1.81           | 2.9E-03 | 234024_at                          | -1.56       | (21)                                    |                                                 |                                   | synapse development and synaptic plasticity (22)                                                                    |
| 96                           | Tgm2      | 1437277_x_at | 1.38            | 3.5E-02 | 201042_at                          | 1.56        | (23, 24)                                | ↑ (7)                                           |                                   | inflammatory response                                                                                               |
| 96                           | Tgm2      | 1433428_x_at | 1.36            | 2.6E-02 |                                    |             |                                         |                                                 |                                   |                                                                                                                     |
| 96                           | Tgm2      | 1455900_x_at | 1.34            | 2.7E-02 |                                    |             |                                         |                                                 |                                   |                                                                                                                     |
| 96                           | Tgm2      | 1417500_a_at | 1.21            | 5.0E-02 |                                    |             |                                         |                                                 |                                   |                                                                                                                     |
| 123                          | Mal2      | 1427042_at   | -1.35           | 1.0E-03 | 224650_at                          | -1.52       |                                         |                                                 | ↑                                 | oligodendrocyte (25)                                                                                                |
| 123                          | Slc14a1   | 1428114_at   | 1.34            | 2.3E-02 | 205856_at                          | 1.52        |                                         | ↑ (4, 26, 27)                                   |                                   | urea transporter                                                                                                    |
| 138                          | Mthfd2    | 1419254_at   | -1.29           | 2.8E-02 | 201761_at                          | 1.50        |                                         |                                                 | ↑                                 |                                                                                                                     |
| 150                          | Gfap      | 1426509_s_at | 1.70            | 4.4E-02 | 229259_at                          | 1.48        | (28)                                    | ↓ (29, 30, 31)                                  | ↓                                 | astrocyte marker, inflammation                                                                                      |
| 150                          | Rgs4      |              |                 |         | 204339_s_at                        | -1.48       | (8, 9)                                  | ↓ (4, 10-13)                                    |                                   | calmodulin binding, regulating the duration of postsynaptic signaling for G-coupled neurotransmitter receptors (14) |
| 158                          | D0H4S114  | 1450839_at   | -1.24           | 2.9E-02 | 201309_x_at                        | -1.47       |                                         | ↓ (4, 10, 11, 37)                               | ↑                                 | regulation of transforming growth factor beta receptor signaling pathway                                            |
| 173                          | Fbxo9     | 1432211_a_at | -1.23           | 1.8E-02 | 1566509_s_at                       | -1.46       |                                         | ↓ (4, 11)                                       | ↓                                 | protein ubiquitination                                                                                              |
| 181                          | Syn2      | 1435511_at   | 1.47            | 1.6E-02 | 210315_at                          | -1.45       | (32)                                    | ↓ (4, 10)                                       |                                   | synaptic transmission                                                                                               |

|     |             |              |       |         |             |       |          |               |   |                                                   |
|-----|-------------|--------------|-------|---------|-------------|-------|----------|---------------|---|---------------------------------------------------|
| 190 | Gadd45b     | 1449773_s_at | 1.65  | 2.1E-02 | 207574_s_at | 1.44  |          | ↑ (4, 10)     |   | MAPKKK cascade, neural activity dependent (33)    |
| 190 | Gadd45b     | 1450971_at   | 1.56  | 1.9E-02 |             |       |          |               |   |                                                   |
| 205 | Chml        | 1422322_at   | 1.22  | 1.8E-02 | 226350_at   | -1.43 |          |               |   |                                                   |
| 205 | Gabra1      | 1421280_at   | -1.32 | 8.2E-03 | 244118_at   | -1.43 | (34)     | ↓ (4)         |   | GABA receptor                                     |
| 237 | Car10       | 1445497_at   | 1.27  | 6.3E-03 | 220889_s_at | -1.41 |          |               |   |                                                   |
| 237 | Cebpb       | 1418901_at   | 1.39  | 1.3E-02 | 212501_at   | 1.41  |          | ↑ (4)         |   | inflammatory response                             |
| 237 | Cebpb       | 1427844_a_at | 1.34  | 1.7E-02 |             |       |          |               |   |                                                   |
| 237 | Rab3b       | 1422583_at   | -1.25 | 2.6E-03 | 227123_at   | -1.41 |          | ↓ (4)         |   | synaptic vesicle protein, inhibitory synapse (35) |
| 256 | Tasp1       | 1424810_at   | -1.24 | 2.0E-02 | 219443_at   | -1.40 |          | ↓ (4)         |   |                                                   |
| 273 | Hk2         | 1422612_at   | 1.25  | 2.2E-03 | 202934_at   | 1.39  |          |               |   |                                                   |
| 294 | RP11-35N6.1 | 1436733_at   | -1.20 | 2.1E-02 | 219732_at   | -1.38 |          |               | ↑ |                                                   |
| 311 | Gng4        | 1417943_at   | -2.26 | 4.0E-04 | 1555867_at  | -1.37 |          |               |   |                                                   |
| 311 | Gng4        | 1447669_s_at | -2.21 | 3.0E-04 |             |       |          |               |   |                                                   |
| 311 | Ms4a6b      | 1418826_at   | 1.31  | 2.6E-02 | 219666_at   | 1.37  |          | ↑ (4, 7)      |   |                                                   |
| 333 | Kif10       | 1416029_at   | 1.65  | 3.0E-02 | 202393_s_at | -1.36 |          |               |   | immune system process                             |
| 366 | Cbln4       |              |       |         | 242524_at   | -1.35 | (21)     |               |   | synapse development and synaptic plasticity (22)  |
| 366 | Fcgr3       | 1448620_at   | 1.27  | 1.0E-02 | 203561_at   | 1.35  |          |               |   |                                                   |
| 366 | Nrxn3       | 1442423_at   | -1.22 | 2.9E-02 | 215021_s_at | -1.35 | (21)     | ↓ (4)         | ↑ | synaptic transmission, cell adhesion              |
| 392 | Ctsc        | 1416382_at   | 1.22  | 1.6E-02 | 201487_at   | 1.34  |          |               | ↑ | immune response                                   |
| 392 | Etv5        | 1450082_s_at | -1.33 | 3.9E-03 | 203348_s_at | -1.34 |          | ↑ (10)        |   |                                                   |
| 392 | Glice       | 1428374_at   | 1.33  | 4.3E-02 | 213552_at   | -1.34 |          |               |   |                                                   |
| 431 | AI593442    | 1444026_at   | -1.23 | 4.6E-02 | 236532_at   | -1.33 |          | ↓ (10)        |   |                                                   |
| 431 | C10orf10    |              |       |         | 209182_s_at | 1.33  |          | ↑ (7)         |   |                                                   |
| 431 | Fbxo9       |              |       |         | 210638_s_at | -1.33 |          | ↓ (4)         | ↓ |                                                   |
| 431 | KIAA1199    | 1429987_at   | -1.72 | 7.3E-05 | 212942_s_at | -1.33 |          |               | ↑ |                                                   |
| 431 | Pdlim1      | 1416554_at   | -1.35 | 7.2E-03 | 208690_s_at | 1.33  |          | ↑ (4), ↓ (10) | ↑ |                                                   |
| 431 | Pygl        | 1417741_at   | -1.24 | 4.6E-02 | 202990_at   | 1.33  |          |               | ↑ |                                                   |
| 431 | Tyrobp      | 1450792_at   | 1.22  | 9.0E-04 | 204122_at   | 1.33  |          |               |   |                                                   |
| 490 | Asph        | 1425274_at   | -1.29 | 4.8E-03 | 225008_at   | 1.32  |          | ↑ (4), ↓ (10) |   |                                                   |
| 490 | Mbp         | 1425264_s_at | -1.30 | 2.8E-03 | 210136_at   | -1.32 | (28, 36) | ↓ (4)         |   | immune response, myelination                      |
| 490 | Ppp1r14c    | 1417701_at   | -1.25 | 2.9E-03 | 226907_at   | -1.32 |          | ↓ (4)         | ↑ | inhibitor of protein phosphatase 1                |
| 523 | Car10       | 1458123_at   | 1.24  | 2.0E-02 | 223550_s_at | -1.31 |          |               |   |                                                   |
| 523 | Cyba        | 1454268_a_at | 1.22  | 1.3E-02 | 203028_s_at | 1.31  |          | ↑ (4)         | ↑ | inflammatory response                             |
| 523 | Etv5        | 1428142_at   | -1.25 | 1.0E-02 | 203349_s_at | -1.31 |          | ↑ (10)        |   |                                                   |
| 523 | Fbxo9       |              |       |         | 212987_at   | -1.31 |          | ↓ (4)         | ↓ |                                                   |
| 523 | Kcnma1      | 1425987_a_at | -1.24 | 7.9E-03 | 221583_s_at | -1.31 | (21)     |               | ↓ |                                                   |
| 523 | Kcnma1      | 1424848_at   | -1.20 | 5.5E-03 |             |       |          |               |   |                                                   |
| 559 | Bcl11a      | 1446293_at   | 1.24  | 2.3E-02 | 222891_s_at | -1.30 |          |               |   | immune system process                             |
| 559 | Ms4a6b      |              |       |         | 223280_x_at | 1.30  |          | ↑ (4)         |   |                                                   |

|     |               |              |       |         |              |       |        |             |   |                                                                                                                               |
|-----|---------------|--------------|-------|---------|--------------|-------|--------|-------------|---|-------------------------------------------------------------------------------------------------------------------------------|
| 612 | Cacna1g       | 1423365_at   | 1.51  | 1.2E-02 | 210380_s_at  | -1.29 |        | ↓(10)       | ↑ |                                                                                                                               |
| 612 | Gabra1        | 1421281_at   | -1.31 | 9.9E-03 | 206678_at    | -1.29 | (34)   | ↓(4), ↑(10) |   | GABA receptor                                                                                                                 |
| 612 | Gabra1        | 1436889_at   | -1.20 | 9.5E-03 |              |       |        |             |   |                                                                                                                               |
| 612 | H2-Ab1        | 1450648_s_at | 1.27  | 2.7E-02 | 212998_x_at  | 1.29  |        | ↑(4)        |   | immune response                                                                                                               |
| 669 | Cxadr         | 1453282_at   | -1.23 | 3.2E-02 | 226374_at    | -1.28 |        |             |   |                                                                                                                               |
| 669 | Hlf           | 1434735_at   | -1.30 | 2.1E-02 | 204755_x_at  | -1.28 |        | ↓(37)       |   |                                                                                                                               |
| 669 | Hlf           | 1434736_at   | -1.26 | 4.5E-02 |              |       |        |             |   |                                                                                                                               |
| 669 | Lyn           | 1451318_a_at | 1.24  | 1.0E-04 | 202625_at    | 1.28  | (21)   |             |   | immune system process                                                                                                         |
| 669 | Ms4a6b        |              |       |         | 224356_x_at  | 1.28  |        |             |   |                                                                                                                               |
| 669 | Tmem200a      | 1436304_at   | 1.27  | 9.7E-03 | 234994_at    | -1.28 |        |             |   |                                                                                                                               |
| 730 | Lbh           | 1429088_at   | -1.26 | 1.1E-03 | 221011_s_at  | -1.27 |        | ↓(4)        |   |                                                                                                                               |
| 730 | Rgs4          |              |       |         | 204337_at    | -1.27 | (8, 9) | ↓(4, 10-13) |   | calmodulin binding, regulating the duration of postsynaptic signaling for G-coupled neurotransmitter receptors (14)           |
| 730 | S100a10       | 1456642_x_at | 1.30  | 4.0E-03 | 200872_at    | 1.27  |        |             |   | interact with 5-HT1bR, calcium ion binding, implicated in depression (38)                                                     |
| 730 | S100a10       | 1416762_at   | 1.26  | 5.7E-03 |              |       |        |             |   |                                                                                                                               |
| 797 | Bcl11a        |              |       |         | 219497_s_at  | -1.26 |        |             |   |                                                                                                                               |
| 797 | Mbp           |              |       |         | 1554544_a_at | -1.26 |        |             |   | immune response, myelination                                                                                                  |
| 797 | Nnat          | 1423506_a_at | 1.45  | 3.9E-02 | 204239_s_at  | -1.26 |        | ↓(4)        |   |                                                                                                                               |
| 797 | Pde10a        | 1419390_at   | 1.23  | 2.9E-02 | 205501_at    | -1.26 | (39)   |             | ↑ | cAMP/PKA signaling, PDE10A inhibitors are currently being evaluated in clinical trials for the treatment of schizophrenia(40) |
| 797 | Tgfb1         | 1420653_at   | 1.32  | 2.1E-02 | 203085_s_at  | 1.26  |        | ↑(4)        | ↓ | inflammatory response                                                                                                         |
| 797 | Zbtb16        | 1439163_at   | -1.21 | 2.7E-02 | 244697_at    | 1.26  | (41)   | ↑(4)        | ↓ | immune system development                                                                                                     |
| 894 | 9430020K01Rik | 1428535_at   | -1.21 | 4.9E-03 | 231841_s_at  | -1.25 | (42)   | ↓(4)        |   |                                                                                                                               |
| 894 | Cntnap4       | 1419044_at   | -1.21 | 3.2E-02 | 1553442_a_at | -1.25 |        | ↓(4)        | ↑ | cell adhesion                                                                                                                 |
| 894 | Cntnap4       |              |       |         | 1554377_a_at | -1.25 |        |             |   |                                                                                                                               |
| 894 | Csf1r         | 1419873_s_at | 1.22  | 1.5E-02 | 203104_at    | 1.25  |        | ↓(19)       |   | transmembrane receptor protein tyrosine kinase signaling pathway                                                              |
| 894 | Csf1r         | 1419872_at   | 1.21  | 1.5E-03 |              |       |        |             |   |                                                                                                                               |
| 894 | Fam149a       | 1437950_at   | -1.26 | 3.0E-03 | 214890_s_at  | -1.25 |        | ↓(10)       |   |                                                                                                                               |
| 894 | Gfap          |              |       |         | 203540_at    | 1.25  |        | ↓(10)       | ↓ |                                                                                                                               |
| 894 | Kcnf1         | 1454768_at   | -1.58 | 6.0E-04 | 210263_at    | -1.25 |        |             | ↓ | cellular process                                                                                                              |
| 894 | Kcnf1         | 1441300_at   | -1.28 | 5.1E-03 |              |       |        |             |   |                                                                                                                               |
| 894 | Krt222        | 1457354_at   | -1.22 | 2.4E-02 | 244111_at    | -1.25 |        | ↓(4)        |   |                                                                                                                               |
| 894 | Pvrl3         | 1423331_a_at | -1.56 | 6.4E-03 | 213325_at    | -1.25 |        | ↑(4)        |   | cell adhesion                                                                                                                 |
| 894 | Pvrl3         | 1448673_at   | -1.48 | 3.7E-02 |              |       |        |             |   |                                                                                                                               |
| 894 | Slc30a3       | 1460654_at   | 1.29  | 2.7E-03 | 207035_at    | -1.25 |        |             |   | cellular process                                                                                                              |
| 986 | Ass1          | 1416239_at   | -1.24 | 1.1E-02 | 207076_s_at  | -1.24 |        | ↓(10)       | ↑ |                                                                                                                               |

|      |               |              |       |         |             |       |          |                  |   |                                                                  |
|------|---------------|--------------|-------|---------|-------------|-------|----------|------------------|---|------------------------------------------------------------------|
| 986  | D0H4S114      |              |       |         | 201310_s_at | -1.24 | (41)     | ↓(4, 37)         | ↑ |                                                                  |
| 986  | H2-T23        | 1449556_at   | -1.30 | 6.0E-03 | 200905_x_at | 1.24  | (43)     | ↓(10), ↑(11)     | ↓ | immune response                                                  |
| 986  | Hdac9         | 1434572_at   | -1.40 | 1.1E-02 | 1552760_at  | -1.24 |          | ↓(4)             |   | inflammatory response                                            |
| 986  | Lyn           |              |       |         | 202626_s_at | 1.24  | (21)     | ↑(7)             |   | inflammatory response                                            |
| 986  | Nrsn1         | 1418588_at   | -1.25 | 7.7E-06 | 239293_at   | -1.24 |          | ↓(4)             |   |                                                                  |
| 986  | Nrxn3         |              |       |         | 205795_at   | -1.24 | (21)     | ↓(4)             | ↑ | neurotransmitter secretion                                       |
| 986  | Nrxn3         |              |       |         | 229649_at   | -1.24 |          | ↓(4)             |   |                                                                  |
| 986  | Pxn           | 1456135_s_at | 1.33  | 1.8E-02 | 201087_at   | 1.24  |          | ↑(10)            |   | cellular response to oxidative stress                            |
| 986  | Pxn           | 1424027_at   | 1.27  | 8.3E-03 |             |       |          |                  |   |                                                                  |
| 986  | Serpinf1      | 1453724_a_at | 1.35  | 2.0E-02 | 202283_at   | -1.24 |          |                  |   | regulation of cell development                                   |
| 1101 | C3ar1         | 1419482_at   | 1.20  | 4.5E-02 | 209906_at   | 1.23  |          |                  |   | inflammatory response                                            |
| 1101 | Cxadr         |              |       |         | 203917_at   | -1.23 |          |                  |   | regulation of cell proliferation                                 |
| 1101 | Epha4         | 1421928_at   | -1.25 | 1.2E-02 | 228948_at   | -1.23 | (44)     | ↓(4)             | ↑ | transmembrane receptor protein tyrosine kinase signaling pathway |
| 1101 | Galnt13       | 1457045_at   | -1.26 | 1.6E-02 | 234472_at   | -1.23 |          | ↓(4)             | ↓ |                                                                  |
| 1101 | Hecw2         | 1455150_at   | -1.31 | 2.6E-02 | 232080_at   | -1.23 | (45)     | ↓(10)            |   |                                                                  |
| 1101 | Ms4a6b        |              |       |         | 223922_x_at | 1.23  |          |                  |   |                                                                  |
| 1101 | Spa17         | 1417635_at   | -1.22 | 4.8E-02 | 205406_s_at | -1.23 |          | ↓(10)            |   |                                                                  |
| 1218 | Cntnap4       |              |       |         | 232388_at   | -1.22 |          |                  |   |                                                                  |
| 1218 | Epha4         |              |       |         | 229374_at   | -1.22 |          |                  |   |                                                                  |
| 1218 | Fam19a1       | 1457092_at   | -1.43 | 1.8E-02 | 230923_at   | -1.22 | (21)     |                  |   |                                                                  |
| 1218 | Psrc1         | 1417323_at   | -1.27 | 2.0E-04 | 201896_s_at | 1.22  |          |                  | ↓ |                                                                  |
| 1218 | Ptprn2        | 1457874_at   | -1.22 | 3.2E-02 | 203030_s_at | -1.22 | (21, 46) | ↓(4), ↑(10)      | ↑ |                                                                  |
| 1218 | Rhoc          | 1448605_at   | 1.24  | 3.8E-02 | 200885_at   | 1.22  |          |                  | ↓ |                                                                  |
| 1218 | Slc8a1        | 1440201_at   | -1.25 | 8.3E-03 | 241752_at   | -1.22 | (47)     | ↓(4), ↑(4)       |   | cytosolic calcium ion homeostasis                                |
| 1356 | 1810041L15Rik | 1429440_at   | 1.33  | 6.7E-03 | 52837_at    | -1.21 |          |                  | ↑ |                                                                  |
| 1356 | 1810041L15Rik | 1455515_at   | 1.22  | 9.0E-03 |             |       |          |                  |   |                                                                  |
| 1356 | 6330527O06Rik | 1423853_at   | -1.40 | 2.6E-02 | 219463_at   | -1.21 |          |                  | ↑ |                                                                  |
| 1356 | Aif1          | 1418204_s_at | 1.27  | 5.1E-03 | 215051_x_at | 1.21  |          | ↓(37)            |   | inflammatory response                                            |
| 1356 | Etv5          |              |       |         | 216375_s_at | -1.21 |          | ↑(10, 11), ↓(19) |   | cellular response to oxidative stress                            |
| 1356 | Fam149a       |              |       |         | 214889_at   | -1.21 |          | ↓(10)            |   |                                                                  |
| 1356 | Fstl5         | 1436800_at   | 1.35  | 1.9E-02 | 232010_at   | -1.21 | (45)     |                  | ↑ |                                                                  |
| 1356 | Hpca          | 1450930_at   | 1.26  | 4.2E-03 | 205454_at   | -1.21 |          |                  |   |                                                                  |
| 1356 | Hpca          | 1425833_a_at | 1.22  | 3.9E-02 |             |       |          |                  |   |                                                                  |
| 1356 | Idi1          | 1423804_a_at | -1.27 | 4.9E-02 | 208881_x_at | -1.21 |          | ↓(4)             |   |                                                                  |
| 1356 | N28178        | 1455023_at   | -1.21 | 2.9E-02 | 213636_at   | -1.21 |          | ↓(4)             |   |                                                                  |
| 1356 | S1pr3         | 1438658_a_at | -1.67 | 4.8E-06 | 228176_at   | 1.21  |          |                  | ↑ | inflammatory response                                            |
| 1356 | S1pr3         | 1437173_at   | -1.28 | 3.8E-03 |             |       |          |                  |   | inflammatory response                                            |
| 1356 | Sla           | 1420819_at   | 1.30  | 1.2E-02 | 203760_s_at | 1.21  |          |                  |   |                                                                  |

|      |        |              |       |             |              |       |                |                                   |
|------|--------|--------------|-------|-------------|--------------|-------|----------------|-----------------------------------|
| 1517 | Bcl11a |              |       | 219498_s_at | -1.20        |       | ↓(11)          | immune system development         |
| 1517 | Cd53   | 1448617_at   | 1.21  | 3.1E-03     | 203416_at    | 1.20  | ↓(19)          |                                   |
| 1517 | Rnf149 | 1440344_at   | 1.21  | 3.9E-02     | 243178_at    | 1.20  | ↓(4), ↑(4, 10) |                                   |
| 1517 | Sept6  | 1460286_at   | -1.28 | 5.7E-03     | 1555526_a_at | -1.20 | ↓(4, 10)       | ↑                                 |
| 1517 | Slc8a1 |              |       | 238546_at   | -1.20        | (47)  |                | cytosolic calcium ion homeostasis |
| 1517 | Syn2   | 1460230_at   | 1.23  | 3.8E-02     | 229039_at    | -1.20 | ↓(4, 10), ↑(7) | neurotransmitter secretion        |
| 1517 | Tns1   | 1449405_at   | 1.34  | 1.6E-02     | 221748_s_at  | 1.20  | ↑(4, 10, 11)   |                                   |
| 1517 | Tns1   | 1419283_s_at | 1.32  | 9.5E-03     |              |       |                |                                   |

PFC, prefrontal cortex; iPS cell, induced pluripotent Stem Cell

up-regulated genes in both Shn-2 KO mice and schizophrenia

down-regulated genes in both Shn-2 KO mice and schizophrenia

\*1: Studies of schizophrenia or bipolar disorder

\*2: Genes up- (↑) or down-regulated (↓) in the post-mortem brains of SCZ and/or BD patients (identified by curated studies in NextBio (<http://www.nextbio.com>))

## References

- (1) Maycox PR, Kelly F, Taylor A, Bates S, Reid J, Logendra R, et al. Analysis of gene expression in two large schizophrenia cohorts identifies multiple changes associated with nerve terminal function. *Mol. Psychiatry*. 2009; 14: 1083–1094.
- (2) Saetre P, Emilsson L, Axelsson E, Kreuger J, Lindholm E, Jazin E. Inflammation-related genes up-regulated in schizophrenia brains. *BMC Psychiatry*. 2007; 7: 46.
- (3) Arion D, Unger T, Lewis DA, Levitt P, Mirnics K. Molecular evidence for increased expression of genes related to immune and chaperone function in the prefrontal cortex in schizophrenia. *Biol. Psychiatry*. 2007; 62:711–721.
- (4) Narayan S, Tang B, Head SR, Gilmartin TJ, Sutcliffe JG, Dean B, et al. Molecular profiles of schizophrenia in the CNS at different stages of illness. *Brain Res*. 2008;1239: 235–248.
- (5) Brennand KJ, Simone A, Jou J, Gelboin-Burkhardt C, Tran N, Sangar S, et al. Modelling schizophrenia using human induced pluripotent stem cells. *Nature*. 2011; 473: 221–225.
- (6) Zakharyan R, Khojetsyan A, Arakelyan A, Boyajyan A, Gevorgyan A, Stahelova A, et al. Association of C1QB gene polymorphism with schizophrenia in Armenian population. *BMC Med. Genet*. 2011; 12: 126.
- (7) Barnes MR, Huxley-Jones J, Maycox PR, Lennon M, Thornber A, Kelly F, et al. Transcription and pathway analysis of the superior temporal cortex and anterior prefrontal cortex in schizophrenia. *Journal of Neuroscience Research*. 2011; 89: 1218–1227.
- (8) Chowdari KV, Mirnics K, Semwal P, Wood J, Lawrence E, Bhatia T, et al. Association and linkage analyses of RGS4 polymorphisms in schizophrenia. *Hum. Mol. Genet*. 2002; 11: 1373–1380.
- (9) Morris DW, Rodgers A, McGhee KA, Schwaiger S, Scully P, Quinn J, et al. Confirming RGS4 as a susceptibility gene for schizophrenia. *Am. J. Med. Genet. B Neuropsychiatr. Genet*. 2004; 125B: 50–53.
- (10) Harris LW, Wayland M, Lan M, Ryan M, Giger T, Lockstone H, et al. The cerebral microvasculature in schizophrenia: a laser capture microdissection study. *PLoS ONE*. 2008; 3(12): e3964.
- (11) Ryan MM, Lockstone HE, Huffaker SJ, Wayland MT, Webster MJ, Bahn S. Gene expression analysis of bipolar disorder reveals downregulation of the ubiquitin cycle and alterations in synaptic genes. *Molecular Psychiatry*. 2006; 11: 965–978.
- (12) Mirnics K, Middleton FA, Stanwood GD, Lewis DA, Levitt P. Disease-specific changes in regulator of G-protein signaling 4 (RGS4) expression in schizophrenia. *Mol. Psychiatry*. 2001; 6: 293–301.
- (13) Le-Niculescu H, Balaraman Y, Patel S, Tan J, Sidhu K, Jerome R et al. Towards understanding the schizophrenia code: An expanded convergent functional genomics approach. *American Journal of Medical Genetics Part B: Neuropsychiatric Genetics*. 2007; 144B: 129–158.
- (14) De Vries L, Zheng B, Fischer T, Elenko E, Farquhar MG. The Regulator of G Protein Signaling Family. *Annual Review of Pharmacology and Toxicology*. 2000; 40: 235–271.
- (15) Vrijenhoek T, Buizer-Voskamp JE, van der Stelt I, Strengman E, Sabatti C, Geurts van Kessel A, et al. Recurrent CNVs disrupt three candidate genes in schizophrenia patients. *Am. J. Hum. Genet*. 2008; 83: 504–510.
- (16) Yan WL, Guan XY, Green ED, Nicolson R, Yap TK, Zhang J, et al. Childhood-onset schizophrenia/autistic disorder and t(1; 7) reciprocal translocation: identification of a BAC contig spanning the translocation breakpoint at 7q21. *Am. J. Med. Genet*. 2000; 96: 749–753.
- (17) Ekelund J, Lichtermann D, Hovatta I, Ellonen P, Suvisaari J, Terwilliger JD, et al. Genome-wide scan for schizophrenia in the Finnish population: evidence for a locus on chromosome 7q22. *Hum. Mol. Genet*. 2000; 9: 1049–1057.
- (18) Lee C-H, Liu C-M, Wen C-C, Chang S-M, Hwu H-G. Genetic copy number variants in sib pairs both affected with schizophrenia. *J. Biomed. Sci*. 2010; 17: 2.
- (19) Iwamoto K, Kakiuchi C, Bundo M, Ikeda K, Kato T. Molecular characterization of bipolar disorder by comparing gene expression profiles of postmortem brains of major mental disorders. *Mol. Psychiatry*. 2004; 4: 406–416.
- (20) Benes FM, Lim B, Matzilevich D, Walsh JP, Subburaju S, Minns M. Regulation of the GABA cell phenotype in hippocampus of schizophrenics and bipolars. *Proc. Natl. Acad. Sci. U.S.A*. 2007; 104: 10164–10169.
- (21) Shi J, Levinson DF, Duan J, Sanders AR, Zheng Y, Pe'er I, et al. Common variants on chromosome 6p22.1 are associated with schizophrenia. *Nature*. 2009; 460: 753–757.
- (22) Yuzaki M. Cbln and C1q family proteins: new transneuronal cytokines. *Cell. Mol. Life Sci*. 2008; 65: 1698–1705.
- (23) Bradford M, Law MH, Stewart AD, Shaw DJ, Megson IL, Wei J. The TGM2 gene is associated with schizophrenia in a British population. *Am. J. Med. Genet. B Neuropsychiatr. Genet*. 2009; 150B: 335–340.
- (24) Bradford M, Law MH, Megson IL, Wei J. The functional significance of the TGM2 gene in schizophrenia: A correlation of SNPs and circulating IL-2 levels. *Journal of Neuroimmunology*. 2011; 232: 5–7.

- (25) Bello-Morales R, de Marco MC, Aranda JF, Matesanz F, Alcina A, López-Guerrero JA. Characterization of the MAL2-positive compartment in oligodendrocytes. *Exp. Cell Res.* 2009; 315: 3453–3465.
- (26) Shao L, Vawter MP. Shared Gene Expression Alterations in Schizophrenia and Bipolar Disorder. *Biol Psychiatry.* 2008; 64: 89–97.
- (27) Iwamoto K, Bundo M, Kato T. Altered expression of mitochondria-related genes in postmortem brains of patients with bipolar disorder or schizophrenia, as revealed by large-scale DNA microarray analysis. *Hum. Mol. Genet.* 2005; 14: 241–253.
- (28) Lewis CM, Levinson DF, Wise LH, DeLisi LE, Straub RE, Hovatta I, et al. Genome scan meta-analysis of schizophrenia and bipolar disorder, part II: Schizophrenia. *Am. J. Hum. Genet.* 2003; 73: 34–48.
- (29) Rajkowska G, Miguel-Hidalgo JJ, Makkos Z, Meltzer H, Overholser J, Stockmeier C. Layer-specific reductions in GFAP-reactive astroglia in the dorsolateral prefrontal cortex in schizophrenia. *Schizophr. Res.* 2002; 57: 127–138.
- (30) Johnston-Wilson NL, Sims CD, Hofmann JP, Anderson L, Shore AD, Torrey EF, et al. Disease-specific alterations in frontal cortex brain proteins in schizophrenia, bipolar disorder, and major depressive disorder. The Stanley Neuropathology Consortium. *Mol. Psychiatry.* 2000; 5: 142–149.
- (31) Webster MJ, O'Grady J, Kleinman JE, Weickert CS. Glial fibrillary acidic protein mRNA levels in the cingulate cortex of individuals with depression, bipolar disorder and schizophrenia. *Neuroscience.* 2005; 133: 453–461.
- (32) Lee HJ, Song JY, Kim JW, Jin S-Y, Hong MS, Park JK, et al. Association study of polymorphisms in synaptic vesicle-associated genes, SYN2 and CPLX2, with schizophrenia. *Behav Brain Funct.* 2005; 1: 15.
- (33) Ma DK, Jang M-H, Guo JU, Kitabatake Y, Chang M, Pow-anpongkul N, et al. Neuronal Activity-Induced Gadd45b Promotes Epigenetic DNA Demethylation and Adult Neurogenesis. *Science.* 2009; 323: 1074–1077.
- (34) Petryshen TL, Middleton FA, Tahl AR, Rockwell GN, Purcell S, Aldinger KA, et al. Genetic investigation of chromosome 5q GABAA receptor subunit genes in schizophrenia. *Mol. Psychiatry.* 2005; 10: 1074–1088
- (35) Tsetsenis T, Younts TJ, Chiu CQ, Kaeser PS, Castillo PE, Südhof TC. Rab3B protein is required for long-term depression of hippocampal inhibitory synapses and for normal reversal learning. *Proceedings of the National Academy of Sciences.* 2011; 108: 14300–14305.
- (36) Straub RE, MacLean CJ, Ma Y, Webb BT, Myakishev MV, Harris-Kerr C, et al. Genome-wide scans of three independent sets of 90 Irish multiplex schizophrenia families and follow-up of selected regions in all families provides evidence for multiple susceptibility genes. *Mol. Psychiatry.* 2002; 7: 542–559.
- (37) Perrone-Bizzozero N. perro-affy-human-186940 [Internet]. 2006. Available from: <http://www.ncbi.nlm.nih.gov/projects/geo/query/acc.cgi?acc=GSE4036>
- (38) Svenningsson P, Greengard P. p11 (S100A10)—an inducible adaptor protein that modulates neuronal functions. *Curr Opin Pharmacol.* 2007; 7: 27–32.
- (39) Lindholm E, Ekholm B, Shaw S, Jalonen P, Johansson G, Pettersson U, et al. A schizophrenia-susceptibility locus at 6q25, in one of the world's largest reported pedigrees. *Am. J. Hum. Genet.* 2001; 69: 96–105.
- (40) Sano H, Nagai Y, Miyakawa T, Shigemoto R, Yokoi M. Increased social interaction in mice deficient of the striatal medium spiny neuron-specific phosphodiesterase 10A2. *Journal of Neurochemistry.* 2008; 105: 546–556.
- (41) Need AC, Ge D, Weale ME, Maia J, Feng S, Heinzen EL, et al. A Genome-Wide Investigation of SNPs and CNVs in Schizophrenia. *PLoS Genet.* 2009; 5: e1000373.
- (42) Purcell SM, Wray NR, Stone JL, Visscher PM, O'Donovan MC, Sullivan PF, et al. Common polygenic variation contributes to risk of schizophrenia and bipolar disorder. *Nature.* 2009; 460: 748–752.
- (43) Consortium TSPG-WAS (GWAS). Genome-wide association study identifies five new schizophrenia loci. *Nature Genetics.* 2011; 43: 969–976.
- (44) Alkelai A, Lupoli S, Greenbaum L, Giegling I, Kohn Y, Sarnar-Kanyas K, et al. Identification of new schizophrenia susceptibility loci in an ethnically homogeneous, family-based, Arab-Israeli sample. *FASEB J.* 2011; 25: 4011–4023.
- (45) Sklar P, Smoller JW, Fan J, Ferreira M a. R, Perlis RH, Chambert K, et al. Whole-genome association study of bipolar disorder. *Molecular Psychiatry.* 2008; 13: 558–569.
- (46) Curtis D, Vine AE, McQuillin A, Bass NJ, Pereira A, Kandaswamy R, et al. Case-case genome-wide association analysis shows markers differentially associated with schizophrenia and bipolar disorder and implicates calcium channel genes. *Psychiatr. Genet.* 2011; 21: 1–4.
- (47) Ikeda M, Aleksic B, Kinoshita Y, Okochi T, Kawashima K, Kushima I, et al. Genome-Wide Association Study of Schizophrenia in a Japanese Population. *Biological Psychiatry.* 2011; 69: 472–478.
