# Supplementary material for: Deficiency of Schnurri-2, an MHC Enhancer Binding Protein, Induces Mild Chronic Inflammation in the Brain and Confers Molecular, Neuronal, and Behavioral Phenotypes Related to Schizophrenia
Source: PubMed Central journal article supplement — Neuropsychopharmacology. 2013 Mar 6;38(8):1409–25. doi: 10.1038/npp.2013.38 (PMC3682135; doi:10.1038/npp.2013.38), 2013-03-06
Supplement: npp201338x3.pdf [file npp201338x3.pdf]

Supplementary Table 3. Biogroups showing significant overlap with both postmortem schizophrenia brain tissue and the PFC in Shn-2 KO mice.

| Rank | Biogroup name                                                                                                             | Source                            | BA10 in schizophrenia |           |         |                                   | PFC in Shn-2 KO |              |           |         |                                   |         |
|------|---------------------------------------------------------------------------------------------------------------------------|-----------------------------------|-----------------------|-----------|---------|-----------------------------------|-----------------|--------------|-----------|---------|-----------------------------------|---------|
|      |                                                                                                                           |                                   | Common genes          | Direction | P value | common genes (opposite direction) | P value         | Common genes | Direction | P value | Common genes (opposite direction) | P value |
| 1    | response to stress                                                                                                        | GO                                | 125                   | up        | 5.4E-44 | 78                                | 1.0E-04         | 36           | up        | 1.9E-03 | 18                                | 8.3E-01 |
| 2    | immune response                                                                                                           | GO                                | 76                    | up        | 3.9E-37 | 17                                | 3.8E-01         | 24           | up        | 4.3E-07 | 5                                 | 8.9E-01 |
| 3    | response to wounding                                                                                                      | GO                                | 65                    | up        | 3.5E-34 | 22                                | 1.1E-01         | 22           | up        | 4.8E-08 | 7                                 | 4.4E-01 |
| 4    | inflammatory response                                                                                                     | GO                                | 49                    | up        | 6.8E-33 | 12                                | 1.2E-01         | 19           | up        | 7.4E-10 | 4                                 | 1.3E-01 |
| 5    | synaptic transmission                                                                                                     | GO                                | 57                    | down      | 5E-32   | 10                                | 1.5E-01         | 11           | down      | 2.5E-02 | 7                                 | 5.5E-01 |
| 6    | transmission of nerve impulse                                                                                             | GO                                | 59                    | down      | 3.2E-29 | 12                                | 1.4E-01         | 12           | down      | 4.1E-02 | 9                                 | 4.7E-01 |
| 7    | cell-cell signaling                                                                                                       | GO                                | 74                    | down      | 5.5E-28 | 26                                | 5.0E-03         | 18           | down      | 5.9E-03 | 16                                | 6.5E-02 |
| 8    | immune effector process                                                                                                   | GO                                | 33                    | up        | 4.7E-24 | 5                                 | 6.5E-01         | 14           | up        | 4.6E-06 | 2                                 | 7.2E-01 |
| 9    | regulation of response to stimulus                                                                                        | GO                                | 46                    | up        | 7.7E-24 | 21                                | 1.7E-01         | 23           | up        | 2.5E-07 | 6                                 | 5.1E-01 |
| 10   | regulation of immune system process                                                                                       | GO                                | 41                    | up        | 1.3E-21 | 12                                | 6.6E-01         | 18           | up        | 2.9E-06 | 6                                 | 4.2E-01 |
| 11   | leukocyte mediated immunity                                                                                               | GO                                | 25                    | up        | 2.5E-20 | 4                                 | 3.2E-01         | 14           | up        | 1.1E-07 | 1                                 | 6.1E-01 |
| 12   | Neutrophil Pathway                                                                                                        | Broad MSigDB - Canonical Pathways | 6                     | up        | 2.8E-20 | 0                                 |                 | 0            |           |         | 0                                 |         |
| 13   | neuron projection                                                                                                         | GO                                | 51                    | down      | 8.3E-20 | 8                                 | 9.1E-01         | 22           | up        | 3.3E-06 | 15                                | 1.6E-02 |
| 14   | positive regulation of immune system process                                                                              | GO                                | 33                    | up        | 1.1E-19 | 5                                 | 1.7E-01         | 15           | up        | 8.9E-07 | 4                                 | 6.2E-01 |
| 15   | regulation of immune response                                                                                             | GO                                | 31                    | up        | 5.2E-19 | 7                                 | 6.9E-01         | 14           | up        | 7.7E-06 | 1                                 | 7.3E-01 |
| 16   | transport                                                                                                                 | GO                                | 170                   | down      | 9.9E-19 | 91                                | 3.1E-06         | 61           | up        | 2.1E-02 | 45                                | 1.6E-01 |
| 17   | adaptive immune response based on somatic recombination of immune receptors built from immunoglobulin superfamily domains | GO                                | 20                    | up        | 1.9E-18 | 3                                 | 8.4E-01         | 11           | up        | 9.6E-08 | 1                                 | 5.2E-01 |
| 18   | response to other organism                                                                                                | GO                                | 33                    | up        | 3.3E-18 | 10                                | 2.2E-01         | 5            | up        | 2.2E-01 | 2                                 | 5.8E-01 |
| 19   | positive regulation of signal transduction                                                                                | GO                                | 31                    | up        | 3.3E-18 | 8                                 | 4.1E-01         | 8            | up        | 3.8E-06 | 6                                 | 1.3E-01 |
| 20   | adaptive immune response                                                                                                  | GO                                | 20                    | up        | 3.8E-18 | 3                                 | 8.6E-01         | 11           | up        | 9.6E-08 | 1                                 | 5.2E-01 |
| 21   | response to organic substance                                                                                             | GO                                | 57                    | up        | 5.6E-18 | 52                                | 3.3E-05         | 27           | up        | 1.5E-05 | 10                                | 5.5E-01 |
| 22   | Metallothionein superfamily, eukaryotic                                                                                   | InterPro                          | 6                     | up        | 6E-18   | 0                                 |                 | 0            |           |         | 0                                 |         |
| 23   | Metallothionein, vertebrate                                                                                               | InterPro                          | 6                     | up        | 6E-18   | 0                                 |                 | 0            |           |         | 0                                 |         |
| 24   | Monocyte Pathway                                                                                                          | Broad MSigDB - Canonical Pathways | 6                     | up        | 2.1E-17 | 0                                 |                 | 1            | down      | 1.7E-01 |                                   |         |
| 25   | E12 binding site geneset 2                                                                                                | Broad MSigDB - Regulatory Motifs  | 150                   | down      | 7.6E-17 | 80                                | 6.4E-06         | 62           | up        | 3.0E-04 | 57                                | 1.3E-03 |
| 26   | cell death                                                                                                                | GO                                | 68                    | up        | 8.3E-17 | 61                                | 1.0E-04         | 30           | up        | 8.1E-05 | 16                                | 7.9E-01 |
| 27   | death                                                                                                                     | GO                                | 68                    | up        | 1E-16   | 61                                | 1.0E-04         | 30           | up        | 9.1E-05 | 16                                | 8.0E-01 |
| 28   | lymphocyte mediated immunity                                                                                              | GO                                | 19                    | up        | 1.2E-16 | 3                                 | 8.3E-01         | 11           | up        | 1.7E-07 | 1                                 | 5.3E-01 |
| 29   | acute inflammatory response                                                                                               | GO                                | 17                    | up        | 1.3E-16 | 3                                 | 1.4E-01         | 11           | up        | 4.9E-09 | 2                                 | 2.3E-01 |
| 30   | cell proliferation                                                                                                        | GO                                | 68                    | up        | 1.6E-16 | 47                                | 2.5E-02         | 35           | up        | 4.8E-08 | 17                                | 1.8E-01 |
| 31   | synapse                                                                                                                   | GO                                | 44                    | down      | 2.3E-16 | 5                                 | 8.6E-01         | 14           | down      | 1.5E-03 | 17                                | 3.1E-03 |
| 32   | Lymphocyte Pathway                                                                                                        | Broad MSigDB - Canonical Pathways | 5                     | up        | 2.9E-16 | 0                                 |                 | 1            | down      | 1.4E-01 | 0                                 |         |
| 33   | Hematopoietic Cell Lineage                                                                                                | Broad MSigDB - Canonical Pathways | 16                    | up        | 3.7E-16 | 1                                 | 9.0E-01         | 5            | up        | 2.7E-05 | 1                                 | 6.4E-01 |
| 34   | response to external stimulus                                                                                             | GO                                | 40                    | up        | 1.8E-15 | 29                                | 9.7E-02         | 17           | up        | 4.0E-05 | 5                                 | 8.1E-02 |
| 35   | cytokine binding                                                                                                          | GO                                | 18                    | up        | 2E-15   | 0                                 |                 | 0            |           |         | 0                                 |         |

|    |                                                     |                                   |     |      |         |    |         |    |      |         |    |         |
|----|-----------------------------------------------------|-----------------------------------|-----|------|---------|----|---------|----|------|---------|----|---------|
| 36 | Predicted Gene Targets for miR-30                   | TargetScan miRNA targets DB       | 70  | down | 3.3E-15 | 22 | 4.7E-02 | 23 | down | 4.6E-03 | 24 | 8.0E-03 |
| 37 | response to hypoxia                                 | GO                                | 19  | up   | 8.5E-15 | 7  | 2.9E-01 | 4  | down | 1.4E-02 | 3  | 1.6E-02 |
| 38 | Predicted Gene Targets for miR-381                  | TargetScan miRNA targets DB       | 55  | down | 8.5E-15 | 15 | 1.8E-01 | 15 | down | 1.9E-01 | 7  | 9.5E-01 |
| 39 | Complement and Coagulation Cascades                 | Broad MSigDB - Canonical Pathways | 11  | up   | 1.3E-14 | 0  |         | 6  | up   | 6.9E-06 | 1  | 3.7E-01 |
| 40 | cell differentiation                                | GO                                | 84  | up   | 1.5E-14 | 87 | 1.7E-06 | 55 | up   | 3.9E-06 | 51 | 2.0E-04 |
| 41 | vasculature development                             | GO                                | 30  | up   | 3.6E-14 | 13 | 6.9E-01 | 20 | up   | 2.9E-07 | 11 | 3.8E-02 |
| 42 | Cell Adhesion Molecules (CAMs)                      | Broad MSigDB - Canonical Pathways | 21  | up   | 4.2E-14 | 5  | 3.0E-01 | 5  | down | 5.2E-02 | 4  | 1.9E-01 |
| 43 | Calcium Regulation In Cardiac Cells                 | Broad MSigDB - Canonical Pathways | 25  | down | 4.2E-14 | 4  | 7.3E-01 | 6  | down | 1.7E-03 | 4  | 3.3E-01 |
| 44 | Cytokine Cytokine Receptor Interaction              | Broad MSigDB - Canonical Pathways | 25  | up   | 4.6E-14 | 4  | 9.3E-01 | 9  | up   | 9.2E-03 | 4  | 8.2E-02 |
| 45 | cellular component movement                         | GO                                | 40  | up   | 4.7E-14 | 41 | 8.6E-05 | 21 | up   | 2.0E-04 | 16 | 8.6E-02 |
| 46 | MMP Cytokine Connection                             | Broad MSigDB - Canonical Pathways | 7   | up   | 9.1E-14 | 0  |         | 0  |      |         | 0  |         |
| 47 | MAZ binding site geneset 2                          | Broad MSigDB - Regulatory Motifs  | 130 | down | 9.8E-14 | 73 | 9.5E-05 | 62 | up   | 1.9E-06 | 48 | 6.9E-02 |
| 48 | ATF3 binding site geneset 3                         | Broad MSigDB - Regulatory Motifs  | 47  | down | 1.2E-13 | 14 | 2.1E-01 | 14 | up   | 2.4E-02 | 10 | 1.2E-01 |
| 49 | CREBP1 binding site geneset 2                       | Broad MSigDB - Regulatory Motifs  | 30  | down | 2.7E-13 | 8  | 3.2E-01 | 8  | down | 3.8E-03 | 4  | 4.1E-01 |
| 50 | positive regulation of response to stimulus         | GO                                | 29  | up   | 2.7E-13 | 11 | 5.3E-02 | 15 | up   | 1.4E-07 | 5  | 2.8E-01 |
| 51 | AP1 binding site geneset 9                          | Broad MSigDB - Regulatory Motifs  | 69  | down | 3.1E-13 | 41 | 3.4E-05 | 35 | up   | 2.0E-04 | 26 | 5.1E-03 |
| 52 | innate immune response                              | GO                                | 25  | up   | 4.1E-13 | 3  | 5.0E-01 | 7  | up   | 1.0E-04 | 1  | 6.5E-01 |
| 53 | ATF1 binding site geneset 1                         | Broad MSigDB - Regulatory Motifs  | 25  | down | 4.5E-13 | 6  | 6.8E-01 | 7  | down | 9.0E-02 | 2  | 8.6E-01 |
| 54 | ion transport                                       | GO                                | 60  | down | 5.2E-13 | 20 | 1.1E-01 | 8  | up   | 1.0E-04 | 21 | 3.0E-04 |
| 55 | LEF1 binding site geneset 4                         | Broad MSigDB - Regulatory Motifs  | 128 | down | 5.6E-13 | 62 | 2.0E-04 | 44 | down | 2.3E-02 | 43 | 5.1E-01 |
| 56 | Immunoglobulin-like fold                            | InterPro                          | 41  | up   | 5.7E-13 | 12 | 8.2E-01 | 20 | up   | 2.0E-06 | 7  | 5.4E-01 |
| 57 | negative regulation of response to stimulus         | GO                                | 12  | up   | 6E-13   | 7  | 1.8E-01 | 8  | up   | 1.7E-03 | 1  | 2.1E-02 |
| 58 | response to endogenous stimulus                     | GO                                | 34  | up   | 7.5E-13 | 37 | 8.8E-05 | 12 | up   | 5.6E-03 | 6  | 2.4E-01 |
| 59 | immune system development                           | GO                                | 30  | up   | 8.9E-13 | 9  | 4.3E-01 | 18 | up   | 3.2E-05 | 6  | 2.3E-01 |
| 60 | regulation of anatomical structure morphogenesis    | GO                                | 28  | up   | 1E-12   | 15 | 8.5E-02 | 19 | up   | 1.7E-05 | 12 | 2.6E-03 |
| 61 | SP1 binding site geneset 6                          | Broad MSigDB - Regulatory Motifs  | 156 | down | 1.2E-12 | 65 | 6.0E-01 | 56 | down | 5.7E-02 | 58 | 2.8E-01 |
| 62 | AP4 binding site geneset 5                          | Broad MSigDB - Regulatory Motifs  | 92  | down | 1.4E-12 | 49 | 1.7E-03 | 49 | up   | 1.8E-05 | 36 | 1.3E-03 |
| 63 | Calcium Signaling Pathway                           | Broad MSigDB - Canonical Pathways | 24  | down | 2.3E-12 | 4  | 8.2E-01 | 5  | up   | 1.6E-01 | 5  | 2.5E-01 |
| 64 | leukocyte migration                                 | GO                                | 15  | up   | 2.7E-12 | 3  | 4.5E-01 | 0  |      |         | 0  |         |
| 65 | production of molecular mediator of immune response | GO                                | 11  | up   | 2.8E-12 | 3  | 4.8E-01 | 0  |      |         | 0  |         |
| 66 | growth                                              | GO                                | 27  | up   | 3.5E-12 | 20 | 4.6E-01 | 18 | up   | 1.7E-02 | 8  | 7.5E-01 |
| 67 | CREB binding site geneset 1                         | Broad MSigDB - Regulatory Motifs  | 28  | down | 3.6E-12 | 7  | 5.0E-01 | 7  | down | 2.8E-02 | 0  |         |
| 68 | response to hormone stimulus                        | GO                                | 32  | up   | 4.1E-12 | 31 | 1.4E-03 | 12 | up   | 2.0E-03 | 6  | 1.6E-01 |

|     |                                                 |                                   |    |      |         |    |         |    |      |         |    |         |
|-----|-------------------------------------------------|-----------------------------------|----|------|---------|----|---------|----|------|---------|----|---------|
| 69  | wound healing                                   | GO                                | 18 | up   | 4.5E-12 | 5  | 8.2E-01 | 0  |      | 0       |    |         |
| 70  | Predicted Gene Targets for miR-330              | TargetScan miRNA targets DB       | 37 | down | 5.6E-12 | 9  | 6.3E-01 | 9  | down | 1.5E-01 | 5  | 9.4E-01 |
| 71  | cell projection part                            | GO                                | 37 | down | 5.8E-12 | 6  | 9.1E-01 | 10 | down | 2.5E-02 | 7  | 1.8E-01 |
| 72  | Immunoglobulin-like                             | InterPro                          | 36 | up   | 6E-12   | 14 | 5.5E-01 | 20 | up   | 5.9E-06 | 7  | 3.9E-01 |
| 73  | regulation of cell size                         | GO                                | 18 | up   | 7.9E-12 | 12 | 2.6E-01 | 8  | up   | 6.4E-02 | 3  | 7.2E-01 |
| 74  | cell growth                                     | GO                                | 17 | up   | 8.7E-12 | 12 | 1.9E-01 | 8  | up   | 4.2E-02 | 3  | 6.6E-01 |
| 75  | positive regulation of programmed cell death    | GO                                | 33 | up   | 1E-11   | 23 | 3.1E-02 | 17 | up   | 4.8E-08 | 6  | 6.3E-01 |
| 76  | cell junction                                   | GO                                | 48 | down | 1.1E-11 | 21 | 5.0E-04 | 22 | up   | 1.2E-05 | 10 | 9.5E-02 |
| 77  | CREBP1CJUN binding site geneset 1               | Broad MSigDB - Regulatory Motifs  | 27 | down | 1.4E-11 | 6  | 5.0E-01 | 6  | down | 7.2E-02 |    | 0       |
| 78  | hemopoiesis                                     | GO                                | 26 | up   | 1.9E-11 | 9  | 3.8E-01 | 14 | up   | 4.0E-04 | 5  | 3.0E-01 |
| 79  | learning or memory                              | GO                                | 18 | down | 1.9E-11 | 1  | 6.6E-01 | 6  | down | 2.8E-03 | 5  | 4.7E-02 |
| 80  | Predicted Gene Targets for miR-181              | TargetScan miRNA targets DB       | 49 | down | 2E-11   | 20 | 5.3E-02 | 14 | down | 1.1E-01 | 12 | 6.4E-01 |
| 81  | Predicted Gene Targets for miR-539              | TargetScan miRNA targets DB       | 33 | down | 2E-11   | 10 | 2.7E-01 | 12 | down | 2.8E-03 | 5  | 4.6E-01 |
| 82  | cell activation                                 | GO                                | 31 | up   | 2.1E-11 | 17 | 3.0E-03 | 17 | up   | 5.0E-04 | 9  | 2.7E-01 |
| 83  | activation of immune response                   | GO                                | 18 | up   | 2.2E-11 | 3  | 3.2E-01 | 0  |      |         |    | 0       |
| 84  | cell migration                                  | GO                                | 31 | up   | 2.2E-11 | 29 | 1.1E-03 | 16 | up   | 1.2E-03 | 11 | 1.9E-01 |
| 85  | hemopoietic or lymphoid organ development       | GO                                | 27 | up   | 2.2E-11 | 9  | 4.0E-01 | 16 | up   | 2.0E-04 | 6  | 1.9E-01 |
| 86  | Complement Pathway                              | Broad MSigDB - Canonical Pathways | 6  | up   | 2.4E-11 | 0  |         | 0  |      |         |    | 0       |
| 87  | NRSF binding site geneset 1                     | Broad MSigDB - Regulatory Motifs  | 16 | down | 2.4E-11 | 0  |         | 3  | up   | 2.2E-01 | 1  | 5.8E-01 |
| 88  | regulation of neurological system process       | GO                                | 20 | down | 3E-11   | 4  | 5.7E-01 | 4  | down | 1.2E-01 | 5  | 3.9E-01 |
| 89  | regulation of angiogenesis                      | GO                                | 13 | up   | 3E-11   | 3  | 4.6E-01 | 0  |      |         |    | 0       |
| 90  | ATF binding site geneset 2                      | Broad MSigDB - Regulatory Motifs  | 23 | down | 3.3E-11 | 4  | 7.0E-01 | 4  | down | 1.4E-01 |    | 0       |
| 91  | Smooth Muscle Contraction                       | Broad MSigDB - Canonical Pathways | 22 | down | 3.4E-11 | 6  | 1.5E-01 | 5  | down | 2.7E-03 | 7  | 3.4E-02 |
| 92  | membrane raft                                   | GO                                | 18 | up   | 3.5E-11 | 9  | 1.1E-01 | 5  | up   | 5.3E-02 | 4  | 2.9E-01 |
| 93  | vesicle                                         | GO                                | 62 | down | 3.8E-11 | 29 | 4.0E-04 | 19 | up   | 3.0E-04 | 13 | 2.6E-01 |
| 94  | positive regulation of immune response          | GO                                | 21 | up   | 4E-11   | 3  | 5.5E-01 | 11 | up   | 1.3E-05 | 1  | 6.0E-01 |
| 95  | behavior                                        | GO                                | 41 | down | 4.1E-11 | 22 | 4.0E-04 | 16 | down | 9.5E-03 | 14 | 1.6E-02 |
| 96  | cellular response to stimulus                   | GO                                | 50 | up   | 4.3E-11 | 47 | 8.6E-03 | 21 | up   | 2.8E-02 | 9  | 9.7E-01 |
| 97  | MYOD binding site geneset 4                     | Broad MSigDB - Regulatory Motifs  | 64 | down | 4.6E-11 | 32 | 2.2E-02 | 23 | down | 1.1E-03 | 28 | 2.4E-03 |
| 98  | Predicted Gene Targets for miR-25               | TargetScan miRNA targets DB       | 42 | down | 5.4E-11 | 13 | 6.7E-01 | 19 | up   | 8.3E-05 | 11 | 4.2E-02 |
| 99  | Gamma-aminobutyric acid A receptor              | InterPro                          | 6  | down | 5.6E-11 | 0  |         | 1  | down | 3.5E-03 |    | 0       |
| 100 | immunoglobulin production                       | GO                                | 8  | up   | 5.9E-11 | 3  | 3.1E-01 | 0  |      |         |    | 0       |
| 101 | transporter activity                            | GO                                | 71 | down | 7.1E-11 | 29 | 1.3E-01 | 19 | down | 2.0E-02 | 20 | 2.9E-01 |
| 102 | regulation of neurotransmitter levels           | GO                                | 14 | down | 8.1E-11 | 0  |         | 4  | down | 5.3E-02 | 3  | 2.0E-01 |
| 103 | regulation of transmission of nerve impulse     | GO                                | 19 | down | 8.4E-11 | 4  | 5.3E-01 | 4  | down | 9.1E-02 | 4  | 4.1E-01 |
| 104 | cytoplasmic vesicle                             | GO                                | 60 | down | 1.1E-10 | 28 | 4.0E-04 | 17 | up   | 1.3E-03 | 13 | 1.8E-01 |
| 105 | regulation of peptidyl-tyrosine phosphorylation | GO                                | 8  | up   | 1.1E-10 | 2  | 1.8E-01 | 4  | up   | 5.4E-02 | 1  | 4.5E-01 |
| 106 | calmodulin binding                              | GO                                | 18 | down | 1.2E-10 | 5  | 5.5E-01 | 6  | up   | 8.0E-04 | 4  | 3.8E-03 |

|                                                            |                                   |     |      |         |    |         |    |      |         |    |         |
|------------------------------------------------------------|-----------------------------------|-----|------|---------|----|---------|----|------|---------|----|---------|
| 107 localization of cell                                   | GO                                | 31  | up   | 1.3E-10 | 30 | 1.6E-03 | 16 | up   | 2.5E-03 | 12 | 1.6E-01 |
| 108 Interferon-induced transmembrane protein               | InterPro                          | 3   | up   | 1.5E-10 | 0  |         | 0  |      |         | 0  |         |
| 109 membrane-bounded vesicle                               | GO                                | 57  | down | 1.5E-10 | 29 | 9.1E-05 | 10 | up   | 3.0E-02 | 10 | 1.5E-01 |
| 110 locomotion                                             | GO                                | 37  | up   | 1.7E-10 | 35 | 4.0E-04 | 17 | up   | 6.2E-03 | 12 | 3.1E-01 |
| 111 cytokine production                                    | GO                                | 21  | up   | 1.9E-10 | 5  | 7.4E-01 | 11 | up   | 2.0E-04 | 4  | 9.1E-03 |
| 112 receptor binding                                       | GO                                | 63  | down | 2.4E-10 | 46 | 5.3E-09 | 18 | up   | 1.2E-03 | 20 | 3.9E-03 |
| 113 complement activation                                  | GO                                | 10  | up   | 2.5E-10 | 0  |         | 0  |      |         | 0  |         |
| 114 Predicted Gene Targets for miR-26                      | TargetScan miRNA targets DB       | 47  | down | 2.6E-10 | 17 | 1.7E-01 | 0  |      |         | 0  |         |
| 115 response to bacterium                                  | GO                                | 20  | up   | 2.7E-10 | 6  | 3.1E-01 | 4  | up   | 1.5E-01 | 1  | 4.9E-01 |
| 116 cytoplasmic membrane-bounded vesicle                   | GO                                | 56  | down | 3E-10   | 28 | 1.0E-04 | 10 | down | 1.1E-01 | 8  | 1.2E-01 |
| 117 regulation of immune effector process                  | GO                                | 13  | up   | 3E-10   | 2  | 9.4E-01 | 5  | up   | 5.9E-02 | 1  | 4.7E-01 |
| 118 NFAT binding site geneset 3                            | Broad MSigDB – Regulatory Motifs  | 110 | down | 4.3E-10 | 64 | 1.7E-05 | 48 | down | 2.0E-04 | 44 | 3.0E-02 |
| 119 FOXO4 binding site geneset 3                           | Broad MSigDB – Regulatory Motifs  | 121 | down | 4.4E-10 | 75 | 1.6E-06 | 50 | down | 1.2E-03 | 34 | 5.7E-01 |
| 120 regulation of cellular component movement              | GO                                | 22  | up   | 4.9E-10 | 17 | 1.4E-02 | 0  |      |         | 0  |         |
| 121 response to steroid hormone stimulus                   | GO                                | 21  | up   | 5.2E-10 | 13 | 1.0E-01 | 4  | down | 2.7E-02 | 4  | 1.3E-01 |
| 122 ATF binding site geneset 1                             | Broad MSigDB – Regulatory Motifs  | 26  | down | 5.2E-10 | 4  | 7.7E-01 | 5  | down | 5.4E-03 | 3  | 5.7E-01 |
| 123 site of polarized growth                               | GO                                | 12  | down | 5.3E-10 | 1  | 7.9E-01 | 4  | up   | 8.0E-04 | 2  | 5.1E-01 |
| 124 axon                                                   | GO                                | 25  | down | 5.4E-10 | 4  | 8.1E-01 | 8  | down | 7.6E-02 | 4  | 8.4E-01 |
| 125 positive regulation of developmental process           | GO                                | 28  | up   | 5.8E-10 | 12 | 6.8E-01 | 22 | up   | 5.7E-09 | 16 | 1.0E-04 |
| 126 axon part                                              | GO                                | 17  | down | 5.9E-10 | 8  | 6.1E-10 | 5  | down | 3.6E-02 | 0  |         |
| 127 positive regulation of cellular component movement     | GO                                | 16  | up   | 7.3E-10 | 10 | 3.1E-02 | 5  | up   | 7.9E-02 | 3  | 1.0E-01 |
| 128 morphogenesis of a branching structure                 | GO                                | 13  | up   | 7.3E-10 | 2  | 9.9E-01 | 8  | up   | 3.0E-04 | 5  | 4.7E-02 |
| 129 leukocyte activation                                   | GO                                | 27  | up   | 7.7E-10 | 14 | 2.8E-03 | 16 | up   | 5.0E-04 | 8  | 3.2E-01 |
| 130 MAPK Signaling Pathway                                 | Broad MSigDB – Canonical Pathways | 26  | down | 8.2E-10 | 16 | 2.4E-03 | 16 | up   | 3.1E-06 | 5  | 6.5E-01 |
| 131 negative regulation of developmental process           | GO                                | 22  | up   | 9.1E-10 | 14 | 1.9E-01 | 14 | down | 7.0E-04 | 12 | 3.2E-02 |
| 132 ATF3 binding site geneset 2                            | Broad MSigDB – Regulatory Motifs  | 24  | down | 9.6E-10 | 4  | 7.8E-01 | 6  | down | 3.0E-02 | 0  |         |
| 133 myeloid cell differentiation                           | GO                                | 16  | up   | 9.7E-10 | 4  | 7.9E-01 | 11 | up   | 4.3E-06 | 2  | 1.2E-01 |
| 134 neuronal cell body                                     | GO                                | 24  | down | 9.9E-10 | 4  | 7.9E-01 | 19 | up   | 9.0E-10 | 9  | 2.6E-02 |
| 135 response to organic cyclic substance                   | GO                                | 13  | up   | 9.9E-10 | 9  | 2.6E-02 | 0  |      |         | 0  |         |
| 136 Predicted Gene Targets for miR-1                       | TargetScan miRNA targets DB       | 40  | down | 9.9E-10 | 10 | 7.0E-01 | 11 | down | 6.5E-02 | 6  | 2.8E-01 |
| 137 cell surface                                           | GO                                | 23  | up   | 1.0E-09 | 13 | 5.3E-01 | 15 | up   | 1.1E-07 | 9  | 7.3E-02 |
| 138 CD44 antigen                                           | InterPro                          | 1   | up   | 1.1E-09 | 0  |         | 0  |      |         | 0  |         |
| 139 CREB binding site geneset 4                            | Broad MSigDB – Regulatory Motifs  | 28  | down | 1.1E-09 | 7  | 5.2E-01 | 5  | up   | 3.1E-02 | 8  | 8.2E-02 |
| 140 generation of a signal involved in cell-cell signaling | GO                                | 18  | down | 1.2E-09 | 4  | 7.0E-01 | 11 | down | 2.1E-03 | 10 | 6.0E-03 |

BA10, Brodmann Area 10; PFC, prefrontal cortex; GO, the Gene Ontology.

“Biogroup name”: A collection of genes that are associated with a specific biological function, pathway, or similar criteria.

“Source”: Data source from which the biogroups are derived as follows:

Gene Ontology (biological processes, cellular components, molecular functions)

MSigDB (canonical pathways, positional gene sets, regulatory motif gene sets)

InterPro (protein families)

TargetScan (predicted miRNA targets)

"Common genes": Number of overlapping genes in the bioset and the biogroup

"Direction": direction of expression for each gene in the biosets (up-regulated or down-regulated)

"p-value": Probability that such an overlap would occur by chance assuming that there is no biological link between the bioset and the biogroup

"Common genes (opposite direction)": Number of overlapping genes between the bioset and the biogroup, but the direction of the expression change was different from each other

Biogroups related to inflammation

- up up-regulated genes expressed in each bioset
- down down-regulated genes expressed in each bioset

Bioset vs Biogroups record downloaded from NextBio(2012/03/08 21:37:19)

Bioset: Brain BA10 from all schizophrenic samples \_vs\_ controls above control group mean pH6.5

Study: Post-mortem tissue from brain BA10 region of schizophrenic and control patients

Bioset vs Biogroups record downloaded from NextBio(2012/04/06 17:12:16)

Bioset: Prefrontal cortex from Shn2 KO mice \_vs\_ wildtype mice

Study: Shn2\_PFC

<https://www.nextbio.com/b/search/bg/?type=bioset&id=101611>
