# Supplementary material for: Deficiency of Schnurri-2, an MHC Enhancer Binding Protein, Induces Mild Chronic Inflammation in the Brain and Confers Molecular, Neuronal, and Behavioral Phenotypes Related to Schizophrenia
Source: PubMed Central journal article supplement — Neuropsychopharmacology. 2013 Mar 6;38(8):1409–25. doi: 10.1038/npp.2013.38 (PMC3682135; doi:10.1038/npp.2013.38), 2013-03-06
Supplement: npp201338x4.pdf [file npp201338x4.pdf]

Supplementary Table 4. Genes differentially expressed in the dentate gyrus of Shn-2 KO mice.

| Symbol        | Description                                                         | Probe ID     | Fold Change | P value  | Rank |
|---------------|---------------------------------------------------------------------|--------------|-------------|----------|------|
| Tdo2          | tryptophan 2,3-dioxygenase                                          | 1419093_at   | -13.69      | 3.60E-06 | 1    |
| Capn3         | calpain 3                                                           | 1426043_a_at | -8.22       | 3.90E-08 | 2    |
| 1441102_at    |                                                                     | 1441102_at   | 7.84        | 5.20E-06 | 3    |
| Capn3         | calpain 3                                                           | 1433681_x_at | -6.74       | 1.20E-07 | 4    |
| Rgs13         | regulator of G-protein signaling 13                                 | 1442263_at   | 6.62        | 0.0010   | 5    |
| Ifi205        | interferon activated gene 205                                       | 1452348_s_at | 6.28        | 6.50E-07 | 6    |
| Wnk4          | WNK lysine deficient protein kinase 4                               | 1427196_at   | 5.82        | 6.60E-05 | 7    |
| 1426906_at    |                                                                     | 1426906_at   | 5.63        | 3.60E-07 | 8    |
| Gpr115        | G protein-coupled receptor 115                                      | 1429460_at   | 5.50        | 0.0005   | 9    |
| Calb1         | calbindin 1                                                         | 1448738_at   | -5.36       | 0.0010   | 10   |
| Acvr1c        | activin A receptor, type IC                                         | 1443225_at   | 5.30        | 8.00E-10 | 11   |
| Mm.132167     |                                                                     | 1460043_at   | -5.25       | 0.0004   | 12   |
| Fxyd7         | FXFD domain-containing ion transport regulator 7                    | 1419200_at   | 5.23        | 0.0001   | 13   |
| Prlr          | prolactin receptor                                                  | 1437397_at   | 5.22        | 3.70E-05 | 14   |
| Batf3         | basic leucine zipper transcription factor, ATF-like 3               | 1453076_at   | 5.16        | 0.0037   | 15   |
| 1456934_at    |                                                                     | 1456934_at   | -5.13       | 0.0003   | 16   |
| Ifi205        | interferon activated gene 205                                       | 1452231_x_at | 5.09        | 1.30E-06 | 17   |
| Ntf3          | neurotrophin 3                                                      | 1434802_s_at | -4.91       | 0.0149   | 18   |
| 1438309_at    |                                                                     | 1438309_at   | 4.73        | 1.30E-09 | 19   |
| Pcdh21        | protocadherin 21                                                    | 1418304_at   | -4.72       | 0.0001   | 20   |
| Gfra2         | glial cell line derived neurotrophic factor family receptor alpha 2 | 1433716_x_at | -4.64       | 4.30E-05 | 21   |
| 1458836_at    |                                                                     | 1458836_at   | -4.61       | 0.0003   | 22   |
| Zcchc5        | zinc finger, CCHC domain containing 5                               | 1437355_at   | -4.56       | 7.00E-05 | 23   |
| 6130401L20Rik | RIKEN cDNA 6130401L20 gene                                          | 1459246_at   | -4.53       | 8.30E-06 | 24   |
| Ryr1          | ryanodine receptor 1, skeletal muscle                               | 1427306_at   | -4.48       | 8.20E-06 | 25   |

|              |                                                        |              |       |          |    |
|--------------|--------------------------------------------------------|--------------|-------|----------|----|
| 1449337_at   |                                                        | 1449337_at   | -4.44 | 1.60E-08 | 26 |
| Aldh1a3      | aldehyde dehydrogenase family 1, subfamily A3          | 1448789_at   | 4.35  | 0.0003   | 27 |
| 1457558_at   |                                                        | 1457558_at   | -4.35 | 1.30E-05 | 28 |
| Gpr12        | G-protein coupled receptor 12                          | 1457702_at   | -4.19 | 0.0005   | 29 |
| Ifi203       | interferon activated gene 203                          | 1448775_at   | 4.16  | 3.40E-05 | 30 |
| 1442613_at   |                                                        | 1442613_at   | -4.11 | 2.40E-05 | 31 |
| Wnt9a        | wingless-type MMTV integration site 9A                 | 1436978_at   | -4.11 | 0.0057   | 32 |
| Fam160a1     | family with sequence similarity 160, member A1         | 1437371_at   | -4.10 | 1.80E-05 | 33 |
| Tdo2         | tryptophan 2,3-dioxygenase                             | 1455770_at   | -4.05 | 1.50E-07 | 34 |
| Nhlh1        | nescient helix loop helix 1                            | 1419533_at   | 4.04  | 0.0183   | 35 |
| Necab3       | N-terminal EF-hand calcium binding protein 3           | 1431946_a_at | 4.00  | 0.0008   | 36 |
| Igsf1        | immunoglobulin superfamily, member 1                   | 1433652_at   | -3.93 | 9.60E-06 | 37 |
| Fbln2        | fibulin 2                                              | 1423407_a_at | 3.91  | 0.0122   | 38 |
| Kcnf1        | potassium voltage-gated channel, subfamily F, member 1 | 1454768_at   | -3.85 | 0.0003   | 39 |
| Gm4658       | predicted gene 4658                                    | 1443888_at   | -3.84 | 4.10E-08 | 40 |
| Spon1        | spondin 1, (f-spondin) extracellular matrix protein    | 1451342_at   | -3.80 | 2.50E-06 | 41 |
| Ogn          | osteoglycin                                            | 1419663_at   | -3.79 | 0.0013   | 42 |
| 1452107_s_at |                                                        | 1452107_s_at | -3.73 | 0.0032   | 43 |
| Calb1        | calbindin 1                                            | 1417504_at   | -3.70 | 0.0004   | 44 |
| Ntf3         | neurotrophin 3                                         | 1450803_at   | -3.69 | 0.0097   | 45 |
| Mm.293522    |                                                        | 1457729_at   | -3.69 | 0.0004   | 46 |
| Sulf1        | sulfatase 1                                            | 1438200_at   | 3.66  | 0.0021   | 47 |
| 1424415_s_at |                                                        | 1424415_s_at | -3.60 | 8.10E-06 | 48 |
| Nrxn3        | neurexin III                                           | 1445217_at   | 3.60  | 2.10E-05 | 49 |
| AW547468     |                                                        | 1440657_at   | -3.59 | 0.0004   | 50 |
| 1429313_at   |                                                        | 1429313_at   | -3.59 | 1.10E-08 | 51 |
| 1452106_at   |                                                        | 1452106_at   | -3.58 | 0.0023   | 52 |

|               |                                                             |              |       |          |    |
|---------------|-------------------------------------------------------------|--------------|-------|----------|----|
| Chst9         | carbohydrate (N-acetylgalactosamine 4-0) sulfotransferase 9 | 1431897_at   | -3.56 | 0.0003   | 53 |
| Grp           | gastrin releasing peptide                                   | 1424525_at   | 3.56  | 0.0009   | 54 |
| Nrxn3         | neurexin III                                                | 1460101_at   | 3.51  | 8.00E-07 | 55 |
| Tox3          | TOX high mobility group box family member 3                 | 1436600_at   | -3.48 | 0.0004   | 56 |
| Spink10       | serine peptidase inhibitor, Kazal type 10                   | 1438444_at   | -3.44 | 1.20E-07 | 57 |
| Pmepa1        | prostate transmembrane protein, androgen induced 1          | 1422706_at   | 3.42  | 0.0053   | 58 |
| Mm.91794      |                                                             | 1443322_at   | -3.41 | 0.0001   | 59 |
| A930035E12Rik | RIKEN cDNA A930035E12 gene                                  | 1429906_at   | 3.40  | 1.60E-06 | 60 |
| AK220484      | cDNA sequence AK220484                                      | 1439341_at   | -3.40 | 6.50E-05 | 61 |
| Cntn3         | contactin 3                                                 | 1438628_x_at | -3.38 | 8.00E-07 | 62 |
| Dsp           | desmoplakin                                                 | 1435493_at   | -3.37 | 0.0060   | 63 |
| Tgfa          | transforming growth factor alpha                            | 1421943_at   | -3.37 | 1.40E-08 | 64 |
| Dsp           | desmoplakin                                                 | 1435494_s_at | -3.36 | 0.0043   | 65 |
| Pmepa1        | prostate transmembrane protein, androgen induced 1          | 1422705_at   | 3.33  | 0.0037   | 66 |
| A930041H05Rik | RIKEN cDNA A930041H05 gene                                  | 1442157_at   | 3.33  | 4.00E-06 | 67 |
| Slc27a2       | solute carrier family 27 (fatty acid transporter), member 2 | 1416316_at   | -3.30 | 0.0001   | 68 |
| Cpne9         | copine family member IX                                     | 1454653_at   | 3.30  | 0.0016   | 69 |
| Prlr          | prolactin receptor                                          | 1448556_at   | 3.27  | 0.0001   | 70 |
| Nrxn3         | neurexin III                                                | 1432931_at   | 3.21  | 8.10E-07 | 71 |
| Npy2r         | neuropeptide Y receptor Y2                                  | 1417489_at   | -3.21 | 0.0014   | 72 |
| AU042950      | expressed sequence AU042950                                 | 1458648_at   | -3.17 | 7.40E-05 | 73 |
| 5930433N17Rik | RIKEN cDNA 5930433N17 gene                                  | 1440721_at   | 3.17  | 2.40E-06 | 74 |
| Cst12         | cystatin 12                                                 | 1424627_at   | 3.13  | 0.0073   | 75 |
| 1436319_at    |                                                             | 1436319_at   | 3.13  | 0.0029   | 76 |
| Ryr1          | ryanodine receptor 1, skeletal muscle                       | 1457347_at   | -3.13 | 2.80E-06 | 77 |
| 6330417G04Rik | RIKEN cDNA 6330417G04 gene                                  | 1440849_at   | -3.12 | 8.70E-06 | 78 |
| Klf10         | Kruppel-like factor 10                                      | 1416029_at   | 3.09  | 0.0093   | 79 |

|               |                                                                     |              |       |          |     |
|---------------|---------------------------------------------------------------------|--------------|-------|----------|-----|
| Clec1a        | C-type lectin domain family 1, member a                             | 1460039_at   | -3.07 | 2.40E-06 | 80  |
| A330050F15Rik | RIKEN cDNA A330050F15 gene                                          | 1441166_at   | -3.07 | 3.10E-06 | 81  |
| Pmepa1        | prostate transmembrane protein, androgen induced 1                  | 1452295_at   | 3.07  | 0.0017   | 82  |
| Tagln         | transgelin                                                          | 1423505_at   | 3.06  | 0.0200   | 83  |
| Gpr12         | G-protein coupled receptor 12                                       | 1449472_at   | -3.01 | 0.0007   | 84  |
| Tesc          | tescalcin                                                           | 1418743_a_at | 2.96  | 9.10E-08 | 85  |
| Iyd           | iodotyrosine deiodinase                                             | 1451547_at   | -2.94 | 2.20E-07 | 86  |
| Itga4         | integrin alpha 4                                                    | 1436037_at   | -2.94 | 0.0003   | 87  |
| Bcl6          | B-cell leukemia/lymphoma 6                                          | 1421818_at   | -2.94 | 5.60E-06 | 88  |
| 9030425E11Rik | RIKEN cDNA 9030425E11 gene                                          | 1448250_at   | 2.93  | 1.70E-05 | 89  |
| Rspo3         | R-spondin 3 homolog (Xenopus laevis)                                | 1455607_at   | -2.92 | 0.0004   | 90  |
| Col3a1        | collagen, type III, alpha 1                                         | 1427883_a_at | 2.91  | 0.0205   | 91  |
| Rgs2          | regulator of G-protein signaling 2                                  | 1447830_s_at | 2.90  | 0.0200   | 92  |
| 1448251_at    |                                                                     | 1448251_at   | 2.90  | 2.90E-06 | 93  |
| Fat4          | FAT tumor suppressor homolog 4 (Drosophila)                         | 1460574_at   | -2.89 | 0.0014   | 94  |
| Necab3        | N-terminal EF-hand calcium binding protein 3                        | 1447907_x_at | 2.87  | 0.0004   | 95  |
| 6130401L20Rik | RIKEN cDNA 6130401L20 gene                                          | 1430430_at   | -2.86 | 1.10E-05 | 96  |
| Fat4          | FAT tumor suppressor homolog 4 (Drosophila)                         | 1459749_s_at | -2.86 | 0.0025   | 97  |
| Cnih3         | cornichon homolog 3 (Drosophila)                                    | 1419517_at   | -2.85 | 0.0115   | 98  |
| Ifi203        | interferon activated gene 203                                       | 1419858_at   | 2.84  | 0.0048   | 99  |
| Tspan18       | tetraspanin 18                                                      | 1442174_at   | -2.84 | 5.60E-05 | 100 |
| Gfra2         | glial cell line derived neurotrophic factor family receptor alpha 2 | 1459847_x_at | -2.84 | 0.0002   | 101 |
| 1429905_at    |                                                                     | 1429905_at   | -2.84 | 0.0054   | 102 |
| Ogn           | osteoglycin                                                         | 1419662_at   | -2.83 | 0.0005   | 103 |
| P2rx7         | purinergic receptor P2X, ligand-gated ion channel, 7                | 1439787_at   | 2.83  | 0.0002   | 104 |
| Trhr          | thyrotropin releasing hormone receptor                              | 1449571_at   | -2.83 | 0.0015   | 105 |
| Hrk           | harakiri, BCL2 interacting protein (contains only BH3 domain)       | 1439854_at   | -2.82 | 0.0010   | 106 |

|            |                                                                     |              |       |          |     |
|------------|---------------------------------------------------------------------|--------------|-------|----------|-----|
| Rasgrp1    | RAS guanyl releasing protein 1                                      | 1431749_a_at | 2.81  | 0.0009   | 107 |
| 1438375_at |                                                                     | 1438375_at   | 2.80  | 0.0179   | 108 |
| Arl4d      | ADP-ribosylation factor-like 4D                                     | 1418250_at   | 2.80  | 0.0474   | 109 |
| Col22a1    | collagen, type XXII, alpha 1                                        | 1453084_s_at | -2.78 | 5.50E-06 | 110 |
| Ctgf       | connective tissue growth factor                                     | 1416953_at   | 2.77  | 0.0262   | 111 |
| Gfap       | glial fibrillary acidic protein                                     | 1426509_s_at | 2.75  | 0.0126   | 112 |
| BI076661   |                                                                     | 1443253_at   | -2.74 | 3.10E-05 | 113 |
| Gfap       | glial fibrillary acidic protein                                     | 1426508_at   | 2.72  | 0.0150   | 114 |
| H2-Aa      | histocompatibility 2, class II antigen A, alpha                     | 1435290_x_at | 2.71  | 0.0026   | 115 |
| Rreb1      | ras responsive element binding protein 1                            | 1428657_at   | -2.70 | 1.20E-05 | 116 |
| Parp8      | poly (ADP-ribose) polymerase family, member 8                       | 1451474_a_at | 2.70  | 2.00E-05 | 117 |
| Gsg1l      | GSG1-like                                                           | 1436013_at   | 2.68  | 0.0020   | 118 |
| Grb14      | growth factor receptor bound protein 14                             | 1417673_at   | -2.68 | 0.0009   | 119 |
| Fmod       | fibromodulin                                                        | 1456084_x_at | 2.68  | 0.0160   | 120 |
| Rgs2       | regulator of G-protein signaling 2                                  | 1419247_at   | 2.67  | 0.0137   | 121 |
| Tesc       | tescalcin                                                           | 1418744_s_at | 2.67  | 4.80E-08 | 122 |
| Tmsb10     | thymosin, beta 10                                                   | 1417219_s_at | 2.66  | 1.10E-06 | 123 |
| Tmsb10     | thymosin, beta 10                                                   | 1436902_x_at | 2.64  | 1.50E-07 | 124 |
| Vwf        | Von Willebrand factor homolog                                       | 1435386_at   | 2.63  | 0.0077   | 125 |
| Frmd4b     | FERM domain containing 4B                                           | 1452123_s_at | -2.63 | 0.0014   | 126 |
| Orc4l      | origin recognition complex, subunit 4-like ( <i>S. cerevisiae</i> ) | 1439643_at   | -2.62 | 7.70E-05 | 127 |
| Pla2g4e    | phospholipase A2, group IVE                                         | 1429862_at   | -2.62 | 0.0001   | 128 |
| Stc1       | stanniocalcin 1                                                     | 1450448_at   | -2.62 | 0.0001   | 129 |
| Htr1a      | 5-hydroxytryptamine (serotonin) receptor 1A                         | 1438710_at   | -2.62 | 2.20E-07 | 130 |
| Clec1a     | C-type lectin domain family 1, member a                             | 1456318_at   | -2.61 | 3.20E-07 | 131 |
| Pip5k1b    | phosphatidylinositol-4-phosphate 5-kinase, type 1 beta              | 1450389_s_at | -2.61 | 0.0005   | 132 |
| Gprc5c     | G protein-coupled receptor, family C, group 5, member C             | 1452947_at   | 2.61  | 0.0055   | 133 |

|               |                                                        |              |       |          |     |
|---------------|--------------------------------------------------------|--------------|-------|----------|-----|
| Unc5d         | unc-5 homolog D (C. elegans)                           | 1440484_at   | 2.61  | 9.20E-05 | 134 |
| 1441823_at    |                                                        | 1441823_at   | 2.58  | 0.0018   | 135 |
| Gal           | galanin                                                | 1460668_at   | 2.58  | 0.0369   | 136 |
| Ccdc88c       | coiled-coil domain containing 88C                      | 1427138_at   | 2.57  | 0.0036   | 137 |
| Rgs2          | regulator of G-protein signaling 2                     | 1419248_at   | 2.56  | 0.0142   | 138 |
| Frmd4b        | FERM domain containing 4B                              | 1438169_a_at | -2.56 | 0.0046   | 139 |
| Cdkn1a        | cyclin-dependent kinase inhibitor 1A (P21)             | 1421679_a_at | 2.54  | 0.0254   | 140 |
| Fam129b       | family with sequence similarity 129, member B          | 1426812_a_at | 2.53  | 0.0010   | 141 |
| Il20rb        | interleukin 20 receptor beta                           | 1437876_at   | -2.53 | 0.0045   | 142 |
| Rasgrp1       | RAS guanyl releasing protein 1                         | 1450143_at   | 2.49  | 0.0027   | 143 |
| Gstm7         | glutathione S-transferase, mu 7                        | 1419072_at   | -2.49 | 0.0002   | 144 |
| 1435311_s_at  |                                                        | 1435311_s_at | 2.48  | 1.20E-05 | 145 |
| 4930578M01Rik | RIKEN cDNA 4930578M01 gene                             | 1456421_at   | -2.48 | 9.30E-05 | 146 |
| Pdzrn4        | PDZ domain containing RING finger 4                    | 1456512_at   | -2.48 | 3.70E-07 | 147 |
| Cdkn1a        | cyclin-dependent kinase inhibitor 1A (P21)             | 1424638_at   | 2.48  | 0.0147   | 148 |
| Cd83          | CD83 antigen                                           | 1416111_at   | -2.47 | 2.90E-05 | 149 |
| Rwdd3         | RWD domain containing 3                                | 1430167_a_at | -2.47 | 1.00E-06 | 150 |
| Pip5k1b       | phosphatidylinositol-4-phosphate 5-kinase, type 1 beta | 1421834_at   | -2.47 | 0.0006   | 151 |
| Itga4         | integrin alpha 4                                       | 1456498_at   | -2.46 | 8.10E-05 | 152 |
| 1435771_at    |                                                        | 1435771_at   | 2.46  | 0.0014   | 153 |
| Lhx9          | LIM homeobox protein 9                                 | 1441313_x_at | -2.46 | 0.0010   | 154 |
| Ifi203        | interferon activated gene 203                          | 1451567_a_at | 2.46  | 4.10E-06 | 155 |
| C4b           | complement component 4B (Childo blood group)           | 1418021_at   | 2.46  | 0.0028   | 156 |
| Ahcy12        | S-adenosylhomocysteine hydrolase-like 2                | 1443468_at   | -2.45 | 0.0011   | 157 |
| 6030442H21Rik | RIKEN cDNA 6030442H21 gene                             | 1432746_at   | -2.45 | 1.90E-06 | 158 |
| Spata13       | spermatogenesis associated 13                          | 1437865_at   | 2.44  | 0.0018   | 159 |
| Matn2         | matrilin 2                                             | 1419442_at   | -2.44 | 0.0072   | 160 |

|            |                                                                      |              |       |          |     |
|------------|----------------------------------------------------------------------|--------------|-------|----------|-----|
| Ap1s3      | adaptor-related protein complex AP-1, sigma 3                        | 1455735_at   | -2.44 | 1.40E-06 | 161 |
| Nrxn3      | neurexin III                                                         | 1457212_at   | 2.44  | 2.70E-06 | 162 |
| Grik3      | glutamate receptor, ionotropic, kainate 3                            | 1440177_at   | -2.43 | 0.0157   | 163 |
| Slc39a6    | solute carrier family 39 (metal ion transporter), member 6           | 1424674_at   | -2.43 | 1.40E-09 | 164 |
| Ccbe1      | collagen and calcium binding EGF domains 1                           | 1440053_at   | -2.42 | 6.90E-07 | 165 |
| Fst        | follistatin                                                          | 1434458_at   | -2.42 | 0.0016   | 166 |
| Ccbe1      | collagen and calcium binding EGF domains 1                           | 1437385_at   | -2.42 | 5.20E-07 | 167 |
| 1455179_at |                                                                      | 1455179_at   | 2.42  | 0.0215   | 168 |
| Slc39a6    | solute carrier family 39 (metal ion transporter), member 6           | 1441949_x_at | -2.41 | 1.20E-05 | 169 |
| Scn9a      | sodium channel, voltage-gated, type IX, alpha                        | 1442810_x_at | -2.40 | 0.0013   | 170 |
| Tgfb3      | transforming growth factor, beta 3                                   | 1417455_at   | 2.40  | 0.0048   | 171 |
| Pik3r1     | phosphatidylinositol 3-kinase, regulatory subunit, polypeptide 1 (p8 | 1425514_at   | 2.40  | 0.0085   | 172 |
| Gm715      | predicted gene 715                                                   | 1445503_at   | 2.39  | 0.0029   | 173 |
| Sv2c       | synaptic vesicle glycoprotein 2c                                     | 1453715_at   | 2.39  | 0.0001   | 174 |
| BG061080   |                                                                      | 1453841_at   | 2.39  | 3.40E-05 | 175 |
| AW551984   | expressed sequence AW551984                                          | 1433434_at   | 2.39  | 0.0116   | 176 |
| Slc39a6    | solute carrier family 39 (metal ion transporter), member 6           | 1424675_at   | -2.39 | 3.90E-05 | 177 |
| Il16       | interleukin 16                                                       | 1448686_at   | -2.38 | 0.0008   | 178 |
| Ror1       | receptor tyrosine kinase-like orphan receptor 1                      | 1442067_at   | -2.38 | 5.00E-05 | 179 |
| Pcolce     | procollagen C-endopeptidase enhancer protein                         | 1437165_a_at | 2.38  | 0.0129   | 180 |
| 1439665_at |                                                                      | 1439665_at   | -2.37 | 3.20E-05 | 181 |
| Mgp        | matrix Gla protein                                                   | 1448416_at   | 2.37  | 0.0055   | 182 |
| Matn2      | matrilin 2                                                           | 1455978_a_at | -2.37 | 0.0030   | 183 |
| Col27a1    | collagen, type XXVII, alpha 1                                        | 1429549_at   | 2.36  | 0.0096   | 184 |
| Col27a1    | collagen, type XXVII, alpha 1                                        | 1453191_at   | 2.36  | 0.0091   | 185 |
| Tmsb10     | thymosin, beta 10                                                    | 1437185_s_at | 2.35  | 6.50E-08 | 186 |
| Cp         | ceruloplasmin                                                        | 1448734_at   | 2.35  | 0.0044   | 187 |

|            |                                                          |              |       |          |     |
|------------|----------------------------------------------------------|--------------|-------|----------|-----|
| Plcb4      | phospholipase C, beta 4                                  | 1425338_at   | 2.35  | 0.0014   | 188 |
| Acvr1c     | activin A receptor, type IC                              | 1428032_at   | 2.35  | 1.80E-05 | 189 |
| Ddit4l     | DNA-damage-inducible transcript 4-like                   | 1439332_at   | -2.34 | 1.60E-06 | 190 |
| Rreb1      | ras responsive element binding protein 1                 | 1438216_at   | -2.34 | 4.30E-05 | 191 |
| 1436329_at |                                                          | 1436329_at   | 2.33  | 0.0006   | 192 |
| Gng4       | guanine nucleotide binding protein (G protein), gamma 4  | 1447669_s_at | -2.32 | 0.0027   | 193 |
| Pip5k1b    | phosphatidylinositol-4-phosphate 5-kinase, type 1 beta   | 1421833_at   | -2.32 | 0.0004   | 194 |
| Nid1       | nidogen 1                                                | 1416808_at   | 2.30  | 0.0081   | 195 |
| Wisp1      | WNT1 inducible signaling pathway protein 1               | 1448594_at   | 2.29  | 0.0218   | 196 |
| 1421595_at |                                                          | 1421595_at   | -2.29 | 0.0018   | 197 |
| Bcl6       | B-cell leukemia/lymphoma 6                               | 1450381_a_at | -2.28 | 3.30E-06 | 198 |
| Stard13    | StAR-related lipid transfer (START) domain containing 13 | 1452604_at   | -2.28 | 1.10E-06 | 199 |
| Spata13    | spermatogenesis associated 13                            | 1454656_at   | 2.28  | 0.0019   | 200 |
| Ccnd1      | cyclin D1                                                | 1417419_at   | 2.28  | 6.50E-05 | 201 |
| Rwdd3      | RWD domain containing 3                                  | 1451809_s_at | -2.27 | 1.10E-05 | 202 |
| Crym       | crystallin, mu                                           | 1416776_at   | -2.27 | 0.0067   | 203 |
| Acvr1      | activin A receptor, type 1                               | 1448460_at   | 2.26  | 0.0027   | 204 |
| Ddit4l     | DNA-damage-inducible transcript 4-like                   | 1444139_at   | -2.26 | 5.30E-07 | 205 |
| Il16       | interleukin 16                                           | 1417391_a_at | -2.24 | 0.0001   | 206 |
| Fndc1      | fibronectin type III domain containing 1                 | 1453321_at   | -2.24 | 0.0029   | 207 |
| Acvr1      | activin A receptor, type 1                               | 1416786_at   | 2.24  | 0.0122   | 208 |
| 1437382_at |                                                          | 1437382_at   | -2.24 | 6.50E-05 | 209 |
| Lhx9       | LIM homeobox protein 9                                   | 1419324_at   | -2.24 | 0.0065   | 210 |
| Fxyd5      | FXDY domain-containing ion transport regulator 5         | 1418296_at   | 2.24  | 0.0030   | 211 |
| Itga8      | integrin alpha 8                                         | 1454966_at   | -2.24 | 0.0072   | 212 |
| Aff3       | AF4/FMR2 family, member 3                                | 1441172_at   | 2.24  | 0.0003   | 213 |
| Col1a2     | collagen, type I, alpha 2                                | 1450857_a_at | 2.24  | 0.0114   | 214 |



|                |                                                                  |              |       |          |     |
|----------------|------------------------------------------------------------------|--------------|-------|----------|-----|
| Rasgrp1        | RAS guanyl releasing protein 1                                   | 1421176_at   | 2.23  | 0.0099   | 215 |
| Pnck           | pregnancy upregulated non-ubiquitously expressed CaM kinase      | 1422711_a_at | -2.23 | 0.0081   | 216 |
| Lrrc6          | leucine rich repeat containing 6 (testis)                        | 1420660_at   | 2.23  | 2.90E-05 | 217 |
| Aplnr          | apelin receptor                                                  | 1438651_a_at | 2.22  | 0.0229   | 218 |
| ENSMUSG0000006 | predicted gene, ENSMUSG00000068790                               | 1452731_x_at | -2.22 | 3.80E-07 | 219 |
| Dusp14         | dual specificity phosphatase 14                                  | 1431422_a_at | 2.22  | 0.0251   | 220 |
| 1443187_at     |                                                                  | 1443187_at   | -2.21 | 0.0002   | 221 |
| Spp1           | secreted phosphoprotein 1                                        | 1449254_at   | 2.21  | 0.0465   | 222 |
| Kcnk2          | potassium channel, subfamily K, member 2                         | 1449158_at   | -2.21 | 0.0010   | 223 |
| AI663975       | expressed sequence AI663975                                      | 1440084_at   | -2.21 | 0.0013   | 224 |
| P2rx7          | purinergic receptor P2X, ligand-gated ion channel, 7             | 1419853_a_at | 2.21  | 0.0170   | 225 |
| Mkx            | mohawk homeobox                                                  | 1437492_at   | -2.21 | 0.0002   | 226 |
| Slc4a4         | solute carrier family 4 (anion exchanger), member 4              | 1421225_a_at | -2.20 | 2.00E-06 | 227 |
| Pacsin2        | protein kinase C and casein kinase substrate in neurons 2        | 1417810_a_at | -2.20 | 1.50E-05 | 228 |
| Trdn           | triadin                                                          | 1451801_at   | -2.20 | 9.90E-05 | 229 |
| 1435261_at     |                                                                  | 1435261_at   | -2.20 | 0.0041   | 230 |
| Epha10         | Eph receptor A10                                                 | 1436093_at   | -2.20 | 0.0011   | 231 |
| 1435310_at     |                                                                  | 1435310_at   | 2.19  | 7.10E-06 | 232 |
| Rbm24          | RNA binding motif protein 24                                     | 1454752_at   | -2.19 | 9.70E-05 | 233 |
| B3galt5        | UDP-Gal:betaGlcNAc beta 1,3-galactosyltransferase, polypeptide 5 | 1428397_at   | -2.19 | 0.0048   | 234 |
| 1456214_at     |                                                                  | 1456214_at   | 2.18  | 1.80E-05 | 235 |
| Pmepa1         | prostate transmembrane protein, androgen induced 1               | 1438783_at   | 2.18  | 0.0002   | 236 |
| 1460009_at     |                                                                  | 1460009_at   | 2.18  | 0.0098   | 237 |
| EG240055       | predicted gene, EG240055                                         | 1435564_at   | -2.18 | 0.0017   | 238 |
| Frzb           | frizzled-related protein                                         | 1448424_at   | -2.17 | 0.0009   | 239 |
| 1458240_at     |                                                                  | 1458240_at   | -2.17 | 0.0008   | 240 |
| Cp             | ceruloplasmin                                                    | 1455393_at   | 2.17  | 0.0146   | 241 |

|                |                                                                        |              |       |          |     |
|----------------|------------------------------------------------------------------------|--------------|-------|----------|-----|
| Osmr           | oncostatin M receptor                                                  | 1418674_at   | 2.17  | 0.0334   | 242 |
| Mn1            | meningioma 1                                                           | 1454867_at   | -2.17 | 0.0345   | 243 |
| Nrxn3          | neurexin III                                                           | 1438193_at   | 2.17  | 5.60E-05 | 244 |
| Gda            | guanine deaminase                                                      | 1422868_s_at | -2.17 | 0.0063   | 245 |
| Ccnd1          | cyclin D1                                                              | 1417420_at   | 2.16  | 1.40E-05 | 246 |
| BB557941       | expressed sequence BB557941                                            | 1443368_at   | -2.16 | 4.40E-05 | 247 |
| Cda            | cytidine deaminase                                                     | 1427357_at   | 2.16  | 0.0003   | 248 |
| 1440918_at     |                                                                        | 1440918_at   | -2.16 | 0.0002   | 249 |
| Gpr68          | G protein-coupled receptor 68                                          | 1455000_at   | 2.15  | 0.0053   | 250 |
| Rhoj           | ras homolog gene family, member J                                      | 1418892_at   | 2.14  | 0.0201   | 251 |
| Frmd4b         | FERM domain containing 4B                                              | 1426594_at   | -2.14 | 0.0008   | 252 |
| Mm.385139      |                                                                        | 1440291_at   | 2.14  | 5.00E-06 | 253 |
| Ccnd1          | cyclin D1                                                              | 1448698_at   | 2.14  | 5.70E-05 | 254 |
| Igfbp5         | insulin-like growth factor binding protein 5                           | 1452114_s_at | -2.14 | 0.0023   | 255 |
| Ecm2           | extracellular matrix protein 2, female organ and adipocyte specific    | 1440096_at   | -2.14 | 0.0498   | 256 |
| ENSMUSG0000006 | predicted gene, ENSMUSG00000068790                                     | 1428301_at   | -2.14 | 1.40E-08 | 257 |
| Pik3r1         | phosphatidylinositol 3-kinase, regulatory subunit, polypeptide 1 (p8   | 1451737_at   | 2.13  | 0.0071   | 258 |
| Trpm3          | transient receptor potential cation channel, subfamily M, member 3     | 1445555_at   | -2.13 | 0.0012   | 259 |
| Lor            | loricrin                                                               | 1448745_s_at | -2.13 | 3.10E-05 | 260 |
| Gdf10          | growth differentiation factor 10                                       | 1424007_at   | -2.13 | 0.0019   | 261 |
| Fnip2          | folliculin interacting protein 2                                       | 1439189_at   | -2.12 | 0.0002   | 262 |
| 1110002E22Rik  | RIKEN cDNA 1110002E22 gene                                             | 1447870_x_at | -2.12 | 0.0023   | 263 |
| Cp             | ceruloplasmin                                                          | 1417494_a_at | 2.12  | 0.0133   | 264 |
| Vwa3b          | von Willebrand factor A domain containing 3B                           | 1453250_at   | -2.12 | 3.80E-05 | 265 |
| Grem2          | gremlin 2 homolog, cysteine knot superfamily ( <i>Xenopus laevis</i> ) | 1418492_at   | -2.11 | 8.10E-05 | 266 |
| Parp3          | poly (ADP-ribose) polymerase family, member 3                          | 1451969_s_at | 2.11  | 0.0208   | 267 |
| Kcna5          | potassium voltage-gated channel, shaker-related subfamily, memb        | 1417680_at   | -2.10 | 0.0012   | 268 |

|               |                                                                    |              |       |          |     |
|---------------|--------------------------------------------------------------------|--------------|-------|----------|-----|
| Anxa2         | annexin A2                                                         | 1419091_a_at | 2.10  | 0.0273   | 269 |
| Smpdl3b       | sphingomyelin phosphodiesterase, acid-like 3B                      | 1417300_at   | -2.10 | 0.0002   | 270 |
| Mm.326876     |                                                                    | 1442556_at   | -2.10 | 0.0106   | 271 |
| 1455137_at    |                                                                    | 1455137_at   | -2.10 | 8.30E-05 | 272 |
| Glra2         | glycine receptor, alpha 2 subunit                                  | 1434098_at   | -2.09 | 2.90E-05 | 273 |
| 1437442_at    |                                                                    | 1437442_at   | 2.09  | 1.80E-05 | 274 |
| Aldh1a2       | aldehyde dehydrogenase family 1, subfamily A2                      | 1422789_at   | 2.09  | 0.0118   | 275 |
| Rasgrp1       | RAS guanyl releasing protein 1                                     | 1434295_at   | 2.09  | 0.0022   | 276 |
| Cebpb         | CCAAT/enhancer binding protein (C/EBP), beta                       | 1418901_at   | 2.09  | 0.0005   | 277 |
| Rfx3          | regulatory factor X, 3 (influences HLA class II expression)        | 1441702_at   | -2.09 | 0.0024   | 278 |
| Trpm3         | transient receptor potential cation channel, subfamily M, member 3 | 1430268_at   | -2.08 | 0.0011   | 279 |
| Ddit4l        | DNA-damage-inducible transcript 4-like                             | 1451751_at   | -2.08 | 5.50E-05 | 280 |
| Cebpb         | CCAAT/enhancer binding protein (C/EBP), beta                       | 1427844_a_at | 2.08  | 0.0016   | 281 |
| 2900017F05Rik | RIKEN cDNA 2900017F05 gene                                         | 1430096_at   | -2.07 | 1.30E-05 | 282 |
| Mm.313328     |                                                                    | 1443157_at   | -2.07 | 4.20E-05 | 283 |
| Gda           | guanine deaminase                                                  | 1435748_at   | -2.07 | 0.0067   | 284 |
| 1453424_at    |                                                                    | 1453424_at   | -2.07 | 0.0092   | 285 |
| Fbxo7         | F-box protein 7                                                    | 1443006_at   | 2.07  | 0.0011   | 286 |
| 1447040_at    |                                                                    | 1447040_at   | -2.07 | 9.70E-05 | 287 |
| 1456923_at    |                                                                    | 1456923_at   | -2.07 | 7.00E-05 | 288 |
| Glis3         | GLIS family zinc finger 3                                          | 1430353_at   | -2.07 | 0.0047   | 289 |
| Zbtb16        | zinc finger and BTB domain containing 16                           | 1459557_at   | -2.06 | 0.0188   | 290 |
| Socs2         | suppressor of cytokine signaling 2                                 | 1449109_at   | 2.06  | 0.0015   | 291 |
| D16Ert472e    | DNA segment, Chr 16, ERATO Doi 472, expressed                      | 1429897_a_at | -2.06 | 0.0364   | 292 |
| Rapgef5       | Rap guanine nucleotide exchange factor (GEF) 5                     | 1455840_at   | -2.05 | 0.0002   | 293 |
| Mycn          | v-myc myelocytomatosis viral related oncogene, neuroblastoma de    | 1417155_at   | -2.05 | 0.0070   | 294 |
| Onecut2       | one cut domain, family member 2                                    | 1444980_at   | -2.05 | 0.0006   | 295 |

|               |                                                                  |              |       |          |     |
|---------------|------------------------------------------------------------------|--------------|-------|----------|-----|
| Lmna          | lamin A                                                          | 1457670_s_at | 2.05  | 0.0056   | 296 |
| 1436125_at    |                                                                  | 1436125_at   | -2.05 | 0.0413   | 297 |
| 4933427G17Rik | RIKEN cDNA 4933427G17 gene                                       | 1431905_s_at | -2.05 | 0.0079   | 298 |
| 1456137_at    |                                                                  | 1456137_at   | 2.05  | 7.10E-05 | 299 |
| Rgnef         | Rho-guanine nucleotide exchange factor                           | 1419457_at   | -2.05 | 0.0007   | 300 |
| Arsj          | arylsulfatase J                                                  | 1457827_at   | 2.05  | 0.0148   | 301 |
| Ifitm3        | interferon induced transmembrane protein 3                       | 1423754_at   | 2.04  | 0.0134   | 302 |
| 2610027H17Rik | RIKEN cDNA 2610027H17 gene                                       | 1442445_at   | -2.04 | 0.0074   | 303 |
| Ier5          | immediate early response 5                                       | 1417612_at   | 2.04  | 0.0201   | 304 |
| Homer2        | homer homolog 2 (Drosophila)                                     | 1424367_a_at | -2.04 | 1.60E-06 | 305 |
| Miat          | myocardial infarction associated transcript (non-protein coding) | 1455325_at   | -2.03 | 0.0139   | 306 |
| Marcks11      | MARCKS-like 1                                                    | 1437226_x_at | -2.03 | 0.0057   | 307 |
| Frzb          | frizzled-related protein                                         | 1416658_at   | -2.03 | 0.0010   | 308 |
| Itga8         | integrin alpha 8                                                 | 1427489_at   | -2.03 | 0.0086   | 309 |
| 1433788_at    |                                                                  | 1433788_at   | 2.03  | 3.40E-06 | 310 |
| Ahcyl2        | S-adenosylhomocysteine hydrolase-like 2                          | 1459537_at   | -2.03 | 0.0020   | 311 |
| 1418507_s_at  |                                                                  | 1418507_s_at | 2.03  | 0.0063   | 312 |
| Cacng5        | calcium channel, voltage-dependent, gamma subunit 5              | 1434785_at   | -2.03 | 0.0003   | 313 |
| Ppp1r14c      | protein phosphatase 1, regulatory (inhibitor) subunit 14c        | 1443799_at   | -2.02 | 0.0011   | 314 |
|               | 11-Mar membrane-associated ring finger (C3HC4) 11                | 1455947_at   | 2.02  | 0.0468   | 315 |
| Sidt1         | SID1 transmembrane family, member 1                              | 1426550_at   | -2.02 | 0.0002   | 316 |
| Fbln5         | fibulin 5                                                        | 1416164_at   | 2.01  | 0.0002   | 317 |
| Kcnq3         | potassium voltage-gated channel, subfamily Q, member 3           | 1458421_at   | 2.01  | 0.0056   | 318 |
| Acvr1         | activin A receptor, type 1                                       | 1457551_at   | 2.01  | 0.0015   | 319 |
| Rbm24         | RNA binding motif protein 24                                     | 1456180_at   | -2.01 | 5.60E-05 | 320 |
| 1419730_at    |                                                                  | 1419730_at   | -2.01 | 0.0015   | 321 |
| Cyp11a1       | cytochrome P450, family 11, subfamily a, polypeptide 1           | 1448804_at   | 2.01  | 0.0212   | 322 |

|               |                                                                   |              |       |          |     |
|---------------|-------------------------------------------------------------------|--------------|-------|----------|-----|
| Lamb1-1       | laminin B1 subunit 1                                              | 1424114_s_at | -2.01 | 1.80E-06 | 323 |
| Aff3          | AF4/FMR2 family, member 3                                         | 1433939_at   | 2.01  | 0.0002   | 324 |
| Inha          | inhibin alpha                                                     | 1422728_at   | -2.01 | 0.0230   | 325 |
| Rgnef         | Rho-guanine nucleotide exchange factor                            | 1419458_at   | -2.00 | 0.0011   | 326 |
| Gda           | guanine deaminase                                                 | 1435749_at   | -2.00 | 0.0084   | 327 |
| 1110002E22Rik | RIKEN cDNA 1110002E22 gene                                        | 1430786_at   | -2.00 | 0.0016   | 328 |
| Myh14         | myosin, heavy polypeptide 14                                      | 1428835_at   | 2.00  | 0.0315   | 329 |
| 1438824_at    |                                                                   | 1438824_at   | 2.00  | 0.0071   | 330 |
| Ifi205        | interferon activated gene 205                                     | 1452349_x_at | 2.00  | 0.0002   | 331 |
| Slc6a15       | solute carrier family 6 (neurotransmitter transporter), member 15 | 1426712_at   | -1.99 | 4.60E-06 | 332 |
| Prdm8         | PR domain containing 8                                            | 1455925_at   | -1.99 | 0.0012   | 333 |
| Lphn3         | latrophilin 3                                                     | 1459295_at   | 1.99  | 0.0154   | 334 |
| 1439899_at    |                                                                   | 1439899_at   | -1.99 | 0.0263   | 335 |
| Scn4b         | sodium channel, type IV, beta                                     | 1434008_at   | 1.99  | 0.0254   | 336 |
| Rhou          | ras homolog gene family, member U                                 | 1449027_at   | -1.98 | 8.20E-07 | 337 |
| 1700011I03Rik | RIKEN cDNA 1700011I03 gene                                        | 1438059_at   | 1.98  | 0.0025   | 338 |
| LOC626082     | hypothetical protein LOC626082                                    | 1446282_at   | -1.98 | 0.0023   | 339 |
| Rfx3          | regulatory factor X, 3 (influences HLA class II expression)       | 1441253_at   | -1.98 | 0.0014   | 340 |
| BM115624      |                                                                   | 1441746_at   | 1.98  | 0.0049   | 341 |
| Kl            | klotho                                                            | 1423400_at   | -1.98 | 0.0001   | 342 |
| 1446224_at    |                                                                   | 1446224_at   | -1.97 | 0.0332   | 343 |
| Wisp1         | WNT1 inducible signaling pathway protein 1                        | 1448593_at   | 1.97  | 0.0226   | 344 |
| Rasgrf1       | RAS protein-specific guanine nucleotide-releasing factor 1        | 1424734_at   | -1.97 | 0.0037   | 345 |
| Fmod          | fibromodulin                                                      | 1437718_x_at | 1.97  | 0.0316   | 346 |
| BC048546      | cDNA sequence BC048546                                            | 1436503_at   | -1.97 | 3.40E-06 | 347 |
| 1458140_at    |                                                                   | 1458140_at   | -1.96 | 0.0011   | 348 |
| Map2k6        | mitogen-activated protein kinase kinase 6                         | 1441482_at   | -1.96 | 0.0454   | 349 |

|               |                                                                    |              |       |          |     |
|---------------|--------------------------------------------------------------------|--------------|-------|----------|-----|
| 6430597G12Rik | RIKEN cDNA 6430597G12 gene                                         | 1431153_at   | 1.96  | 0.0008   | 350 |
| Lpar4         | lysophosphatidic acid receptor 4                                   | 1452424_at   | -1.96 | 0.0003   | 351 |
| Bgn           | biglycan                                                           | 1416405_at   | 1.95  | 0.0257   | 352 |
| Bgn           | biglycan                                                           | 1448323_a_at | 1.95  | 0.0182   | 353 |
| Fmod          | fibromodulin                                                       | 1437685_x_at | 1.95  | 0.0192   | 354 |
| AU023617      | expressed sequence AU023617                                        | 1444974_at   | -1.95 | 0.0169   | 355 |
| Baiap3        | BAI1-associated protein 3                                          | 1427509_at   | -1.95 | 0.0016   | 356 |
| Plcb4         | phospholipase C, beta 4                                            | 1425339_at   | 1.94  | 0.0002   | 357 |
| Itpr1         | inositol 1,4,5-triphosphate receptor 1                             | 1460203_at   | -1.94 | 0.0004   | 358 |
| Adcy1         | adenylate cyclase 1                                                | 1445359_at   | -1.94 | 6.50E-06 | 359 |
| 5830456J23Rik | RIKEN cDNA 5830456J23 gene                                         | 1433169_at   | -1.93 | 0.0003   | 360 |
| 1435424_x_at  |                                                                    | 1435424_x_at | -1.93 | 0.0057   | 361 |
| 1460038_at    |                                                                    | 1460038_at   | -1.93 | 0.0059   | 362 |
| 9330120H11Rik | RIKEN cDNA 9330120H11 gene                                         | 1457671_at   | -1.93 | 1.50E-06 | 363 |
| Cdh13         | cadherin 13                                                        | 1423551_at   | -1.92 | 0.0002   | 364 |
| 1457440_at    |                                                                    | 1457440_at   | -1.92 | 0.0004   | 365 |
| Slc16a10      | solute carrier family 16 (monocarboxylic acid transporters), membe | 1457851_at   | -1.92 | 0.0004   | 366 |
| Mm.381253     |                                                                    | 1441430_at   | 1.92  | 0.0030   | 367 |
| BM247146      |                                                                    | 1438295_at   | 1.92  | 0.0013   | 368 |
| Npnt          | nephronectin                                                       | 1426560_a_at | -1.92 | 0.0008   | 369 |
| Cp            | ceruloplasmin                                                      | 1417495_x_at | 1.92  | 0.0296   | 370 |
| Lphn3         | latrophilin 3                                                      | 1427809_at   | 1.91  | 0.0115   | 371 |
| 1428891_at    |                                                                    | 1428891_at   | -1.91 | 0.0004   | 372 |
| 9830166K06Rik | RIKEN cDNA 9830166K06 gene                                         | 1457389_at   | -1.91 | 0.0064   | 373 |
| Iigp1         | interferon inducible GTPase 1                                      | 1419043_a_at | -1.91 | 0.0030   | 374 |
| Pdzn3         | PDZ domain containing RING finger 3                                | 1416846_a_at | -1.91 | 0.0007   | 375 |
| Gadd45a       | growth arrest and DNA-damage-inducible 45 alpha                    | 1449519_at   | 1.91  | 0.0311   | 376 |

|               |                                                             |              |       |          |     |
|---------------|-------------------------------------------------------------|--------------|-------|----------|-----|
| 1436996_x_at  |                                                             | 1436996_x_at | 1.91  | 0.0260   | 377 |
| Serpinf1      | serine (or cysteine) peptidase inhibitor, clade F, member 1 | 1416168_at   | 1.91  | 0.0315   | 378 |
| Isoc1         | isochorismatase domain containing 1                         | 1425050_at   | -1.90 | 0.0016   | 379 |
| Rabgap1l      | RAB GTPase activating protein 1-like                        | 1429196_at   | 1.90  | 0.0001   | 380 |
| Zfp521        | zinc finger protein 521                                     | 1451332_at   | 1.90  | 0.0001   | 381 |
| 1300014I06Rik | RIKEN cDNA 1300014I06 gene                                  | 1428851_at   | -1.90 | 7.40E-06 | 382 |
| Usp29         | ubiquitin specific peptidase 29                             | 1419237_at   | 1.90  | 6.60E-06 | 383 |
| Epha3         | Eph receptor A3                                             | 1443273_at   | 1.90  | 0.0003   | 384 |
| Ifitm1        | interferon induced transmembrane protein 1                  | 1424254_at   | 1.90  | 0.0215   | 385 |
| Cobl          | cordon-bleu                                                 | 1434917_at   | 1.90  | 0.0083   | 386 |
| Gpc3          | glypican 3                                                  | 1450990_at   | -1.90 | 0.0455   | 387 |
| Srl           | sarcalumenin                                                | 1436867_at   | -1.90 | 0.0021   | 388 |
| Adcy2         | adenylate cyclase 2                                         | 1444633_at   | 1.90  | 0.0002   | 389 |
| AK220484      | cDNA sequence AK220484                                      | 1442703_at   | -1.89 | 1.60E-05 | 390 |
| 9330154F10Rik | RIKEN cDNA 9330154F10 gene                                  | 1433325_at   | 1.89  | 0.0056   | 391 |
| 1437574_at    |                                                             | 1437574_at   | 1.89  | 0.0124   | 392 |
| Igfbp7        | insulin-like growth factor binding protein 7                | 1423584_at   | 1.89  | 0.0162   | 393 |
| Itpr1         | inositol 1,4,5-triphosphate receptor 1                      | 1417279_at   | -1.89 | 5.40E-05 | 394 |
| C230098O21Rik | RIKEN cDNA C230098O21 gene                                  | 1433988_s_at | -1.89 | 0.0009   | 395 |
| Cntn3         | contactin 3                                                 | 1420739_at   | -1.89 | 1.40E-05 | 396 |
| Chn2          | chimerin (chimaerin) 2                                      | 1428573_at   | -1.89 | 0.0069   | 397 |
| Otop2         | otopetrin 2                                                 | 1443043_at   | 1.88  | 0.0389   | 398 |
| Synm          | synemin, intermediate filament protein                      | 1457275_at   | -1.88 | 0.0003   | 399 |
| Zfhx4         | zinc finger homeodomain 4                                   | 1437556_at   | -1.88 | 0.0002   | 400 |
| Ccbe1         | collagen and calcium binding EGF domains 1                  | 1439327_at   | -1.88 | 8.90E-05 | 401 |
| Klhl32        | kelch-like 32 (Drosophila)                                  | 1458375_at   | -1.88 | 0.0010   | 402 |
| Smo           | smoothened homolog (Drosophila)                             | 1427048_at   | -1.88 | 0.0012   | 403 |

|               |                                                                     |              |       |          |     |
|---------------|---------------------------------------------------------------------|--------------|-------|----------|-----|
| C230034O21Rik | RIKEN cDNA C230034O21 gene                                          | 1439707_at   | -1.88 | 0.0011   | 404 |
| Isoc1         | isochorismatase domain containing 1                                 | 1425052_at   | -1.88 | 0.0040   | 405 |
| 1435458_at    |                                                                     | 1435458_at   | 1.88  | 0.0233   | 406 |
| 1431402_at    |                                                                     | 1431402_at   | -1.88 | 0.0034   | 407 |
| Postn         | periostin, osteoblast specific factor                               | 1423606_at   | 1.87  | 0.0031   | 408 |
| Gfra1         | glial cell line derived neurotrophic factor family receptor alpha 1 | 1450440_at   | -1.87 | 0.0144   | 409 |
| Rbm24         | RNA binding motif protein 24                                        | 1458624_at   | -1.87 | 0.0008   | 410 |
| Rasgrf2       | RAS protein-specific guanine nucleotide-releasing factor 2          | 1421621_at   | -1.87 | 0.0020   | 411 |
| 1440555_at    |                                                                     | 1440555_at   | 1.87  | 0.0029   | 412 |
| Foxd1         | forkhead box D1                                                     | 1418876_at   | 1.87  | 0.0206   | 413 |
| Mm.381347     |                                                                     | 1445207_at   | -1.87 | 0.0003   | 414 |
| Thbd          | thrombomodulin                                                      | 1448529_at   | 1.87  | 0.0064   | 415 |
| Lamb1-1       | laminin B1 subunit 1                                                | 1424113_at   | -1.87 | 0.0005   | 416 |
| Stat3         | signal transducer and activator of transcription 3                  | 1426587_a_at | 1.87  | 1.80E-05 | 417 |
| 1700086L19Rik | RIKEN cDNA 1700086L19 gene                                          | 1455085_at   | -1.87 | 0.0069   | 418 |
| Mrc1          | mannose receptor, C type 1                                          | 1450430_at   | 1.87  | 0.0064   | 419 |
| Syt10         | synaptotagmin X                                                     | 1450347_at   | -1.87 | 1.10E-05 | 420 |
| AW146388      |                                                                     | 1454388_at   | -1.86 | 0.0026   | 421 |
| Fst           | follistatin                                                         | 1421365_at   | -1.86 | 0.0011   | 422 |
| Fbln1         | fibulin 1                                                           | 1422540_at   | -1.86 | 4.80E-05 | 423 |
| Tgfb1         | transforming growth factor, beta induced                            | 1448123_s_at | 1.86  | 0.0226   | 424 |
| 1438470_at    |                                                                     | 1438470_at   | 1.86  | 0.0058   | 425 |
| 1443086_at    |                                                                     | 1443086_at   | -1.86 | 6.50E-05 | 426 |
| Fmod          | fibromodulin                                                        | 1415939_at   | 1.86  | 0.0209   | 427 |
| D16Ert472e    | DNA segment, Chr 16, ERATO Doi 472, expressed                       | 1451466_at   | -1.86 | 0.0466   | 428 |
| Slc20a1       | solute carrier family 20, member 1                                  | 1448568_a_at | 1.86  | 1.10E-05 | 429 |
| Chst15        | carbohydrate (N-acetylgalactosamine 4-sulfate 6-O) sulfotransferase | 1452092_at   | -1.86 | 0.0038   | 430 |



|               |                                                       |              |       |          |     |
|---------------|-------------------------------------------------------|--------------|-------|----------|-----|
| Agxt211       | alanine-glyoxylate aminotransferase 2-like 1          | 1452975_at   | 1.86  | 0.0266   | 431 |
| BC046404      | cDNA sequence BC046404                                | 1436195_at   | 1.85  | 6.70E-06 | 432 |
| Kcns2         | K <sup>+</sup> voltage-gated channel, subfamily S, 2  | 1421342_at   | 1.85  | 0.0002   | 433 |
| Slc30a3       | solute carrier family 30 (zinc transporter), member 3 | 1460654_at   | 1.85  | 4.90E-05 | 434 |
| Lrrtm1        | leucine rich repeat transmembrane neuronal 1          | 1455883_a_at | -1.85 | 4.40E-05 | 435 |
| Apod          | apolipoprotein D                                      | 1416371_at   | 1.85  | 0.0229   | 436 |
| Marcks11      | MARCKS-like 1                                         | 1435627_x_at | -1.85 | 0.0058   | 437 |
| 1444275_at    |                                                       | 1444275_at   | -1.85 | 1.50E-05 | 438 |
| Rab26         | RAB26, member RAS oncogene family                     | 1435500_at   | -1.85 | 0.0115   | 439 |
| Ncapg         | non-SMC condensin I complex, subunit G                | 1455686_at   | -1.85 | 0.0250   | 440 |
| Trdn          | triadin                                               | 1426143_at   | -1.84 | 0.0025   | 441 |
| Kcnt2         | potassium channel, subfamily T, member 2              | 1440030_at   | 1.84  | 0.0013   | 442 |
| 1441127_at    |                                                       | 1441127_at   | -1.84 | 3.00E-05 | 443 |
| Lyz2          | lysozyme 2                                            | 1423547_at   | 1.84  | 0.0135   | 444 |
| AI663975      | expressed sequence AI663975                           | 1442725_at   | -1.84 | 0.0033   | 445 |
| Fibcd1        | fibrinogen C domain containing 1                      | 1435482_at   | -1.84 | 0.0427   | 446 |
| 6330406I15Rik | RIKEN cDNA 6330406I15 gene                            | 1426937_at   | 1.84  | 0.0005   | 447 |
| 1438724_at    |                                                       | 1438724_at   | -1.84 | 0.0034   | 448 |
| 5330423I11Rik | RIKEN cDNA 5330423I11 gene                            | 1431473_at   | -1.84 | 0.0109   | 449 |
| Plscr2        | phospholipid scramblase 2                             | 1448961_at   | 1.84  | 0.0168   | 450 |
| Fmod          | fibromodulin                                          | 1437324_x_at | 1.84  | 0.0190   | 451 |
| Ccdc3         | coiled-coil domain containing 3                       | 1428549_at   | 1.84  | 0.0197   | 452 |
| F13a1         | coagulation factor XIII, A1 subunit                   | 1448929_at   | 1.84  | 0.0169   | 453 |
| Marcks11      | MARCKS-like 1                                         | 1435415_x_at | -1.83 | 0.0039   | 454 |
| Col22a1       | collagen, type XXII, alpha 1                          | 1429280_at   | -1.83 | 0.0004   | 455 |
| Slit2         | slit homolog 2 (Drosophila)                           | 1440650_at   | -1.83 | 0.0005   | 456 |
| Dpyd          | dihydropyrimidine dehydrogenase                       | 1427946_s_at | -1.83 | 1.10E-05 | 457 |

|               |                                                                      |              |       |          |     |
|---------------|----------------------------------------------------------------------|--------------|-------|----------|-----|
| Col1a2        | collagen, type I, alpha 2                                            | 1423110_at   | 1.83  | 0.0054   | 458 |
| Onecut2       | one cut domain, family member 2                                      | 1460044_at   | -1.83 | 0.0003   | 459 |
| Fbn1          | fibrillin 1                                                          | 1460208_at   | -1.83 | 0.0003   | 460 |
|               | 3-Mar membrane-associated ring finger (C3HC4) 3                      | 1436614_at   | 1.83  | 0.0208   | 461 |
| Zfp703        | zinc finger protein 703                                              | 1436026_at   | 1.82  | 0.0208   | 462 |
| Hrasls        | HRAS-like suppressor                                                 | 1428991_at   | 1.82  | 0.0108   | 463 |
| Mkx           | mohawk homeobox                                                      | 1446811_at   | -1.82 | 0.0102   | 464 |
| 9130213B05Rik | RIKEN cDNA 9130213B05 gene                                           | 1424214_at   | -1.82 | 0.0003   | 465 |
| Kcnt2         | potassium channel, subfamily T, member 2                             | 1459971_at   | 1.82  | 0.0002   | 466 |
| Lcorl         | ligand dependent nuclear receptor corepressor-like                   | 1446571_at   | -1.82 | 0.0419   | 467 |
| BB637274      |                                                                      | 1431248_at   | -1.82 | 0.0046   | 468 |
| 1427086_at    |                                                                      | 1427086_at   | -1.82 | 1.00E-04 | 469 |
| Slit2         | slit homolog 2 (Drosophila)                                          | 1424659_at   | -1.82 | 0.0005   | 470 |
| 1439709_at    |                                                                      | 1439709_at   | -1.82 | 0.0343   | 471 |
| Sphkap        | SPHK1 interactor, AKAP domain containing                             | 1446364_at   | -1.81 | 0.0011   | 472 |
| Olfml2b       | olfactomedin-like 2B                                                 | 1423915_at   | -1.81 | 0.0339   | 473 |
| Kndc1         | kinase non-catalytic C-lobe domain (KIND) containing 1               | 1428599_at   | 1.81  | 2.30E-07 | 474 |
| Il11ra1       | interleukin 11 receptor, alpha chain 1                               | 1417505_s_at | -1.81 | 7.20E-07 | 475 |
| Plcb4         | phospholipase C, beta 4                                              | 1441531_at   | 1.81  | 0.0036   | 476 |
| 2900064F13Rik | RIKEN cDNA 2900064F13 gene                                           | 1432813_at   | 1.81  | 0.0038   | 477 |
| 1439947_at    |                                                                      | 1439947_at   | 1.81  | 0.0249   | 478 |
| Crtac1        | cartilage acidic protein 1                                           | 1426606_at   | 1.81  | 8.00E-05 | 479 |
| Mpzl2         | myelin protein zero-like 2                                           | 1416236_a_at | 1.80  | 0.0262   | 480 |
| A230067G21Rik | RIKEN cDNA A230067G21 gene                                           | 1455750_at   | -1.80 | 0.0039   | 481 |
| Adamts3       | a disintegrin-like and metallopeptidase (reprolysin type) with throm | 1441693_at   | -1.80 | 0.0018   | 482 |
| Actn2         | actinin alpha 2                                                      | 1456968_at   | -1.80 | 0.0007   | 483 |
| Rassf3        | Ras association (RalGDS/AF-6) domain family member 3                 | 1448546_at   | 1.80  | 0.0024   | 484 |

|            |                                                                  |              |       |          |     |
|------------|------------------------------------------------------------------|--------------|-------|----------|-----|
| Aff3       | AF4/FMR2 family, member 3                                        | 1453395_at   | 1.80  | 0.0025   | 485 |
| Nrxn3      | neurexin III                                                     | 1444700_at   | 1.80  | 4.60E-05 | 486 |
| Slc27a3    | solute carrier family 27 (fatty acid transporter), member 3      | 1427180_at   | 1.80  | 0.0310   | 487 |
| 1458479_at |                                                                  | 1458479_at   | -1.80 | 0.0103   | 488 |
| AW554440   |                                                                  | 1446596_at   | -1.80 | 0.0076   | 489 |
| Popdc3     | popeye domain containing 3                                       | 1423856_at   | -1.79 | 0.0091   | 490 |
| 1451430_at |                                                                  | 1451430_at   | -1.79 | 0.0113   | 491 |
| 1441499_at |                                                                  | 1441499_at   | -1.79 | 2.80E-05 | 492 |
| Txnrd3     | thioredoxin reductase 3                                          | 1449623_at   | 1.79  | 0.0391   | 493 |
| B3galt5    | UDP-Gal:betaGlcNAc beta 1,3-galactosyltransferase, polypeptide 5 | 1428398_at   | -1.79 | 0.0056   | 494 |
| Bcl6       | B-cell leukemia/lymphoma 6                                       | 1453595_at   | -1.79 | 0.0005   | 495 |
| D5Ert505e  | DNA segment, Chr 5, ERATO Doi 505, expressed                     | 1458934_at   | -1.79 | 0.0007   | 496 |
| Rhou       | ras homolog gene family, member U                                | 1449028_at   | -1.79 | 9.00E-07 | 497 |
| Gm266      | predicted gene 266                                               | 1436115_at   | -1.78 | 0.0100   | 498 |
| Fgfbp1     | fibroblast growth factor binding protein 1                       | 1419086_at   | 1.78  | 0.0298   | 499 |
| S100a11    | S100 calcium binding protein A11 (calgizzarin)                   | 1460351_at   | 1.78  | 0.0289   | 500 |
| 1455200_at |                                                                  | 1455200_at   | -1.78 | 4.00E-06 | 501 |
| Mm.19314   |                                                                  | 1455528_at   | -1.78 | 0.0069   | 502 |
| C78859     | expressed sequence C78859                                        | 1420048_at   | -1.78 | 0.0003   | 503 |
| Cp         | ceruloplasmin                                                    | 1417496_at   | 1.78  | 0.0128   | 504 |
| Mapk4      | mitogen-activated protein kinase 4                               | 1435367_at   | 1.78  | 0.0217   | 505 |
| Inpp4b     | inositol polyphosphate-4-phosphatase, type II                    | 1441416_at   | -1.78 | 0.0004   | 506 |
| Mcm6       | minichromosome maintenance deficient 6 (MIS5 homolog, S. pombe)  | 1438852_x_at | -1.78 | 0.0003   | 507 |
| Lcorl      | ligand dependent nuclear receptor corepressor-like               | 1439272_at   | -1.77 | 0.0304   | 508 |
| Lrig1      | leucine-rich repeats and immunoglobulin-like domains 1           | 1449893_a_at | 1.77  | 0.0016   | 509 |
| Tgfb1      | transforming growth factor, beta induced                         | 1456250_x_at | 1.77  | 0.0255   | 510 |
| Cd55       | CD55 antigen                                                     | 1418762_at   | 1.77  | 0.0075   | 511 |

|               |                                                                                |              |       |          |     |
|---------------|--------------------------------------------------------------------------------|--------------|-------|----------|-----|
| Smo           | smoothened homolog (Drosophila)                                                | 1427049_s_at | -1.77 | 0.0038   | 512 |
| Lrp1b         | low density lipoprotein-related protein 1B (deleted in tumors)                 | 1450211_at   | -1.77 | 5.90E-06 | 513 |
| Efcab1        | EF hand calcium binding domain 1                                               | 1454198_a_at | -1.77 | 0.0022   | 514 |
| Lrrtm1        | leucine rich repeat transmembrane neuronal 1                                   | 1452624_at   | -1.77 | 1.10E-05 | 515 |
| Chst15        | carbohydrate (N-acetylgalactosamine 4-sulfate 6-O) sulfotransferase            | 1426514_at   | -1.77 | 0.0059   | 516 |
| Cdh13         | cadherin 13                                                                    | 1434115_at   | -1.77 | 0.0005   | 517 |
| D030041H20Rik | RIKEN cDNA D030041H20 gene                                                     | 1458126_at   | 1.77  | 0.0125   | 518 |
| LOC553091     | hypothetical LOC553091                                                         | 1456130_at   | -1.77 | 0.0003   | 519 |
| AI852580      | expressed sequence AI852580                                                    | 1459723_at   | 1.77  | 0.0065   | 520 |
| Dclk3         | doublecortin-like kinase 3                                                     | 1436532_at   | -1.77 | 0.0355   | 521 |
| Lphn3         | latrophilin 3                                                                  | 1446197_at   | 1.77  | 0.0323   | 522 |
| Insm1         | insulinoma-associated 1                                                        | 1455865_at   | 1.77  | 0.0006   | 523 |
| Rabgap1l      | RAB GTPase activating protein 1-like                                           | 1453365_at   | 1.77  | 0.0120   | 524 |
| Aox3          | aldehyde oxidase 3                                                             | 1418858_at   | 1.77  | 0.0088   | 525 |
| Lpp           | LIM domain containing preferred translocation partner in lipoma                | 1425673_at   | -1.77 | 0.0004   | 526 |
| Rbpj          | recombination signal binding protein for immunoglobulin kappa J region         | 1448957_at   | 1.77  | 0.0229   | 527 |
| Fam107b       | family with sequence similarity 107, member B                                  | 1447242_at   | -1.77 | 0.0005   | 528 |
| Serpine3      | serpin peptidase inhibitor, clade E (nexin, plasminogen activator inhibitor 1) | 1455697_at   | 1.77  | 0.0007   | 529 |
| Mm.381834     |                                                                                | 1446286_at   | -1.77 | 0.0060   | 530 |
| Tgm2          | transglutaminase 2, C polypeptide                                              | 1455900_x_at | 1.76  | 0.0056   | 531 |
| Gm10643       | predicted gene 10643                                                           | 1457115_at   | -1.76 | 0.0001   | 532 |
| Tmem47        | transmembrane protein 47                                                       | 1446150_at   | 1.76  | 0.0095   | 533 |
| Serping1      | serine (or cysteine) peptidase inhibitor, clade G, member 1                    | 1416625_at   | 1.76  | 0.0093   | 534 |
| Nt5dc2        | 5'-nucleotidase domain containing 2                                            | 1424882_a_at | -1.76 | 0.0021   | 535 |
| Entpd3        | ectonucleoside triphosphate diphosphohydrolase 3                               | 1434049_at   | -1.76 | 1.00E-05 | 536 |
| 1448735_at    |                                                                                | 1448735_at   | 1.76  | 0.0152   | 537 |
| Myo5b         | myosin VB                                                                      | 1437698_at   | -1.76 | 0.0106   | 538 |

|               |                                                         |              |       |          |     |
|---------------|---------------------------------------------------------|--------------|-------|----------|-----|
| Prlr          | prolactin receptor                                      | 1425853_s_at | 1.76  | 0.0017   | 539 |
| 4932441J04Rik | RIKEN cDNA 4932441J04 gene                              | 1436563_at   | 1.76  | 0.0060   | 540 |
| 2700045P11Rik | RIKEN cDNA 2700045P11 gene                              | 1453428_at   | -1.75 | 0.0009   | 541 |
| Gng4          | guanine nucleotide binding protein (G protein), gamma 4 | 1417943_at   | -1.75 | 0.0004   | 542 |
| Cdkl1         | cyclin-dependent kinase-like 1 (CDC2-related kinase)    | 1453231_at   | -1.75 | 0.0012   | 543 |
| Isoc1         | isochorismatase domain containing 1                     | 1425053_at   | -1.75 | 0.0045   | 544 |
| Marcks1l      | MARCKS-like 1                                           | 1415922_s_at | -1.75 | 0.0091   | 545 |
| 1446847_at    |                                                         | 1446847_at   | 1.75  | 0.0340   | 546 |
| BC017612      | cDNA sequence BC017612                                  | 1419403_at   | -1.75 | 0.0008   | 547 |
| 6330406I15Rik | RIKEN cDNA 6330406I15 gene                              | 1452244_at   | 1.75  | 0.0027   | 548 |
| Umodl1        | uromodulin-like 1                                       | 1439211_at   | -1.75 | 0.0006   | 549 |
| Kcns2         | K <sup>+</sup> voltage-gated channel, subfamily S, 2    | 1457325_at   | 1.75  | 0.0023   | 550 |
| C430045I18Rik | RIKEN cDNA C430045I18 gene                              | 1430633_s_at | -1.75 | 0.0009   | 551 |
| Upp1          | uridine phosphorylase 1                                 | 1448562_at   | -1.75 | 0.0053   | 552 |
| Itih3         | inter-alpha trypsin inhibitor, heavy chain 3            | 1449123_at   | 1.75  | 0.0234   | 553 |
| Rimbp2        | RIMS binding protein 2                                  | 1441625_at   | 1.74  | 0.0143   | 554 |
| Lphn3         | latrophilin 3                                           | 1458772_at   | 1.74  | 0.0295   | 555 |
| Acot5         | acyl-CoA thioesterase 5                                 | 1425257_at   | -1.74 | 0.0191   | 556 |
| Pdgfc         | platelet-derived growth factor, C polypeptide           | 1449351_s_at | -1.74 | 0.0240   | 557 |
| 1439026_at    |                                                         | 1439026_at   | -1.74 | 8.70E-05 | 558 |
| Col6a3        | collagen, type VI, alpha 3                              | 1424131_at   | 1.74  | 0.0006   | 559 |
| BB310408      |                                                         | 1441936_x_at | -1.74 | 0.0010   | 560 |
| Cdh7          | cadherin 7, type 2                                      | 1456970_at   | 1.74  | 0.0363   | 561 |
| Sox11         | SRY-box containing gene 11                              | 1453125_at   | 1.74  | 0.0005   | 562 |
| Ahcy12        | S-adenosylhomocysteine hydrolase-like 2                 | 1452703_at   | -1.74 | 0.0003   | 563 |
| 1437466_at    |                                                         | 1437466_at   | -1.74 | 7.90E-05 | 564 |
| 1422445_at    |                                                         | 1422445_at   | 1.74  | 0.0100   | 565 |

|            |                                            |              |       |          |     |
|------------|--------------------------------------------|--------------|-------|----------|-----|
| Anxa1      | annexin A1                                 | 1448213_at   | 1.74  | 0.0023   | 566 |
| Aldh3b1    | aldehyde dehydrogenase 3 family, member B1 | 1452301_at   | 1.74  | 0.0027   | 567 |
| Ddn        | dendrin                                    | 1436268_at   | -1.74 | 6.80E-05 | 568 |
| Emp3       | epithelial membrane protein 3              | 1417104_at   | 1.74  | 0.0285   | 569 |
| Fras1      | Fraser syndrome 1 homolog (human)          | 1439019_at   | -1.74 | 0.0049   | 570 |
| AV024133   |                                            | 1436786_at   | -1.74 | 5.90E-05 | 571 |
| Acvr2a     | activin receptor IIA                       | 1451004_at   | -1.74 | 8.50E-07 | 572 |
| Panx1      | pannexin 1                                 | 1416379_at   | 1.74  | 0.0037   | 573 |
| Rnf19b     | ring finger protein 19B                    | 1432478_a_at | 1.74  | 0.0012   | 574 |
| Esrrg      | estrogen-related receptor gamma            | 1455267_at   | -1.73 | 0.0055   | 575 |
| Mfge8      | milk fat globule-EGF factor 8 protein      | 1420911_a_at | -1.73 | 0.0116   | 576 |
| BB454746   |                                            | 1446338_at   | -1.73 | 0.0224   | 577 |
| Lphn3      | latrophilin 3                              | 1445108_at   | 1.73  | 0.0339   | 578 |
| Col4a5     | collagen, type IV, alpha 5                 | 1425476_at   | 1.73  | 0.0159   | 579 |
| Arhgap15   | Rho GTPase activating protein 15           | 1435959_at   | -1.73 | 6.10E-06 | 580 |
| Ust        | uronyl-2-sulfotransferase                  | 1439218_at   | -1.73 | 0.0017   | 581 |
| Isoc1      | isochorismatase domain containing 1        | 1425051_at   | -1.73 | 0.0030   | 582 |
| Gpc1       | glypican 1                                 | 1417389_at   | 1.73  | 0.0187   | 583 |
| 1440455_at |                                            | 1440455_at   | 1.73  | 0.0025   | 584 |
| 1431367_at |                                            | 1431367_at   | -1.73 | 0.0128   | 585 |
| Ly6h       | lymphocyte antigen 6 complex, locus H      | 1422625_at   | -1.73 | 0.0063   | 586 |
| 1457896_at |                                            | 1457896_at   | -1.73 | 0.0018   | 587 |
| Gss        | glutathione synthetase                     | 1448273_at   | -1.73 | 1.20E-06 | 588 |
| 1436356_at |                                            | 1436356_at   | 1.73  | 0.0010   | 589 |
| BB532898   |                                            | 1444432_at   | -1.72 | 0.0002   | 590 |
| Nt5e       | 5' nucleotidase, ecto                      | 1428547_at   | -1.72 | 0.0016   | 591 |
| Adcy8      | adenylate cyclase 8                        | 1418754_at   | -1.72 | 5.90E-05 | 592 |

|               |                                                                                   |              |       |          |     |
|---------------|-----------------------------------------------------------------------------------|--------------|-------|----------|-----|
| Il33          | interleukin 33                                                                    | 1416200_at   | -1.72 | 1.70E-05 | 593 |
| AI506816      | expressed sequence AI506816                                                       | 1439483_at   | -1.72 | 2.30E-06 | 594 |
| A830018L16Rik | RIKEN cDNA A830018L16 gene                                                        | 1445819_at   | -1.72 | 0.0370   | 595 |
| Lrrc6         | leucine rich repeat containing 6 (testis)                                         | 1440798_x_at | 1.72  | 0.0012   | 596 |
| Vwa1          | von Willebrand factor A domain containing 1                                       | 1426399_at   | 1.72  | 0.0071   | 597 |
| Itga6         | integrin alpha 6                                                                  | 1422444_at   | 1.72  | 0.0103   | 598 |
| Capg          | capping protein (actin filament), gelsolin-like                                   | 1450355_a_at | 1.72  | 0.0493   | 599 |
| Gpr153        | G protein-coupled receptor 153                                                    | 1426973_at   | 1.72  | 0.0269   | 600 |
| P4ha1         | procollagen-proline, 2-oxoglutarate 4-dioxygenase (proline 4-hydroxylase)         | 1426519_at   | 1.71  | 0.0268   | 601 |
| 1441548_at    |                                                                                   | 1441548_at   | -1.71 | 0.0049   | 602 |
| Tpd52l1       | tumor protein D52-like 1                                                          | 1418412_at   | -1.71 | 2.10E-07 | 603 |
| Vstm2b        | V-set and transmembrane domain containing 2B                                      | 1419118_at   | -1.71 | 0.0089   | 604 |
| Gm13889       | predicted gene 13889                                                              | 1455271_at   | -1.71 | 0.0048   | 605 |
| Nupr1         | nuclear protein 1                                                                 | 1419666_x_at | 1.71  | 0.0387   | 606 |
| Necab2        | N-terminal EF-hand calcium binding protein 2                                      | 1418881_at   | 1.71  | 0.0010   | 607 |
| Alcam         | activated leukocyte cell adhesion molecule                                        | 1446720_at   | -1.71 | 4.10E-05 | 608 |
| Pls1          | plastin 1 (I-isoform)                                                             | 1460406_at   | -1.71 | 1.70E-05 | 609 |
| Fyco1         | FYVE and coiled-coil domain containing 1                                          | 1427177_at   | -1.71 | 0.0058   | 610 |
| BC068157      | cDNA sequence BC068157                                                            | 1429269_at   | -1.71 | 0.0195   | 611 |
| Gjd2          | gap junction protein, delta 2                                                     | 1435297_at   | 1.71  | 0.0334   | 612 |
| Camk1d        | calcium/calmodulin-dependent protein kinase ID                                    | 1426389_at   | 1.71  | 0.0061   | 613 |
| Kcng2         | potassium voltage-gated channel, subfamily G, member 2                            | 1434838_at   | -1.71 | 0.0020   | 614 |
| Rab27a        | RAB27A, member RAS oncogene family                                                | 1429123_at   | -1.71 | 0.0064   | 615 |
| Scn9a         | sodium channel, voltage-gated, type IX, alpha                                     | 1442809_at   | -1.71 | 0.0013   | 616 |
| Pcolce        | procollagen C-endopeptidase enhancer protein                                      | 1448433_a_at | 1.70  | 0.0182   | 617 |
| Pde1b         | phosphodiesterase 1B, Ca <sup>2+</sup> -calmodulin dependent                      | 1449420_at   | -1.70 | 0.0275   | 618 |
| Galnt13       | UDP-N-acetyl-alpha-D-galactosamine:polypeptide N-acetylglucosaminyltransferase 13 | 1457045_at   | -1.70 | 0.0413   | 619 |

|            |                                                             |              |       |          |     |
|------------|-------------------------------------------------------------|--------------|-------|----------|-----|
| Prune2     | prune homolog 2 (Drosophila)                                | 1439274_at   | -1.70 | 0.0090   | 620 |
| Asb11      | ankyrin repeat and SOCS box-containing 11                   | 1422153_a_at | -1.70 | 0.0366   | 621 |
| Elmod1     | ELMO domain containing 1                                    | 1457223_at   | -1.70 | 0.0249   | 622 |
| Sox11      | SRY-box containing gene 11                                  | 1436790_a_at | 1.70  | 0.0014   | 623 |
| Pfkfb3     | 6-phosphofructo-2-kinase/fructose-2,6-biphosphatase 3       | 1416432_at   | 1.70  | 0.0019   | 624 |
| Bmp6       | bone morphogenetic protein 6                                | 1450759_at   | 1.70  | 0.0033   | 625 |
| Tmtc1      | transmembrane and tetratricopeptide repeat containing 1     | 1439855_at   | -1.70 | 0.0089   | 626 |
| Lor        | loricrin                                                    | 1420183_at   | -1.70 | 7.90E-05 | 627 |
| Tbc1d8b    | TBC1 domain family, member 8B                               | 1430133_at   | -1.70 | 0.0038   | 628 |
| Lrg1       | leucine-rich alpha-2-glycoprotein 1                         | 1417290_at   | 1.70  | 0.0434   | 629 |
| Rasgrf1    | RAS protein-specific guanine nucleotide-releasing factor 1  | 1459056_at   | -1.70 | 0.0071   | 630 |
| Mm.406713  |                                                             | 1444109_at   | -1.69 | 0.0024   | 631 |
| Camk1d     | calcium/calmodulin-dependent protein kinase ID              | 1452050_at   | 1.69  | 0.0034   | 632 |
| 1440311_at |                                                             | 1440311_at   | -1.69 | 0.0011   | 633 |
| 1433945_at |                                                             | 1433945_at   | -1.69 | 0.0002   | 634 |
| Il1r1      | interleukin 1 receptor, type I                              | 1448950_at   | -1.69 | 0.0065   | 635 |
| Lepr       | leptin receptor                                             | 1456156_at   | 1.69  | 0.0229   | 636 |
| Rfx3       | regulatory factor X, 3 (influences HLA class II expression) | 1437375_at   | -1.69 | 0.0008   | 637 |
| Smc2       | structural maintenance of chromosomes 2                     | 1429660_s_at | -1.69 | 0.0047   | 638 |
| Stard5     | StAR-related lipid transfer (START) domain containing 5     | 1450769_s_at | -1.69 | 0.0002   | 639 |
| Lmna       | lamin A                                                     | 1421654_a_at | 1.69  | 0.0197   | 640 |
| Lypd6      | LY6/PLAUR domain containing 6                               | 1454969_at   | -1.69 | 0.0089   | 641 |
| Gng7       | guanine nucleotide binding protein (G protein), gamma 7     | 1455190_at   | -1.69 | 0.0059   | 642 |
| Adamtsl2   | ADAMTS-like 2                                               | 1429214_at   | -1.69 | 0.0009   | 643 |
| H2-Ea      | histocompatibility 2, class II antigen E alpha              | 1422892_s_at | 1.69  | 0.0191   | 644 |
|            | 228712                                                      | 1457966_at   | -1.69 | 0.0040   | 645 |
| Sftpc      | surfactant associated protein C                             | 1418639_at   | -1.69 | 0.0003   | 646 |



|               |                                                                             |              |       |          |     |
|---------------|-----------------------------------------------------------------------------|--------------|-------|----------|-----|
| Rgs17         | regulator of G-protein signaling 17                                         | 1450693_at   | 1.68  | 0.0039   | 647 |
| Mcm6          | minichromosome maintenance deficient 6 (MIS5 homolog, <i>S. pombe</i> )     | 1416251_at   | -1.68 | 0.0005   | 648 |
| Cdkl4         | cyclin-dependent kinase-like 4                                              | 1433969_at   | -1.68 | 3.90E-05 | 649 |
| 1443906_at    |                                                                             | 1443906_at   | 1.68  | 0.0019   | 650 |
| Efcab1        | EF hand calcium binding domain 1                                            | 1455074_at   | -1.68 | 0.0006   | 651 |
| Gimap6        | GTPase, IMAP family member 6                                                | 1427891_at   | -1.68 | 0.0014   | 652 |
| 1439015_at    |                                                                             | 1439015_at   | -1.68 | 0.0080   | 653 |
| Car4          | carbonic anhydrase 4                                                        | 1448949_at   | -1.68 | 0.0042   | 654 |
| Gbp2          | guanylate binding protein 2                                                 | 1435906_x_at | 1.68  | 0.0291   | 655 |
| Neu2          | neuraminidase 2                                                             | 1431936_a_at | 1.68  | 0.0339   | 656 |
| B830012L14Rik | RIKEN cDNA B830012L14 gene                                                  | 1439311_at   | 1.68  | 0.0449   | 657 |
| Cish          | cytokine inducible SH2-containing protein                                   | 1448724_at   | 1.67  | 0.0067   | 658 |
| BB762344      |                                                                             | 1458711_at   | 1.67  | 0.0050   | 659 |
| Pgam2         | phosphoglycerate mutase 2                                                   | 1418373_at   | -1.67 | 0.0187   | 660 |
| Bambi         | BMP and activin membrane-bound inhibitor, homolog ( <i>Xenopus laevis</i> ) | 1423753_at   | -1.67 | 0.0076   | 661 |
| Gpr124        | G protein-coupled receptor 124                                              | 1418379_s_at | 1.67  | 0.0008   | 662 |
| Fzd7          | frizzled homolog 7 ( <i>Drosophila</i> )                                    | 1450044_at   | 1.67  | 0.0179   | 663 |
| Serpinf1      | serine (or cysteine) peptidase inhibitor, clade F, member 1                 | 1453724_a_at | 1.67  | 0.0392   | 664 |
| Fzd5          | frizzled homolog 5 ( <i>Drosophila</i> )                                    | 1455604_at   | -1.67 | 0.0003   | 665 |
| Mapk6         | mitogen-activated protein kinase 6                                          | 1419169_at   | 1.67  | 0.0237   | 666 |
| 2700045P11Rik | RIKEN cDNA 2700045P11 gene                                                  | 1456995_at   | -1.67 | 0.0054   | 667 |
| Tmem200a      | transmembrane protein 200A                                                  | 1436304_at   | 1.67  | 0.0135   | 668 |
| Btg3          | B-cell translocation gene 3                                                 | 1449007_at   | -1.67 | 0.0007   | 669 |
| Zbtb16        | zinc finger and BTB domain containing 16                                    | 1439163_at   | -1.67 | 0.0490   | 670 |
| 1445550_at    |                                                                             | 1445550_at   | -1.67 | 0.0013   | 671 |
| Slc35f3       | solute carrier family 35, member F3                                         | 1456764_at   | 1.67  | 0.0006   | 672 |
| Hmox1         | heme oxygenase (decycling) 1                                                | 1448239_at   | 1.67  | 6.00E-05 | 673 |

|               |                                                         |              |       |          |     |
|---------------|---------------------------------------------------------|--------------|-------|----------|-----|
| Pthlh         | parathyroid hormone-like peptide                        | 1422324_a_at | 1.67  | 0.0001   | 674 |
| Tmtc4         | transmembrane and tetratricopeptide repeat containing 4 | 1428113_at   | -1.67 | 0.0058   | 675 |
| 1427045_at    |                                                         | 1427045_at   | 1.66  | 0.0132   | 676 |
| 1429783_at    |                                                         | 1429783_at   | -1.66 | 0.0106   | 677 |
| Sez6          | seizure related gene 6                                  | 1427674_a_at | 1.66  | 0.0240   | 678 |
| Rreb1         | ras responsive element binding protein 1                | 1452862_at   | -1.66 | 6.50E-05 | 679 |
| A230055J12Rik | RIKEN cDNA A230055J12 gene                              | 1443457_at   | 1.66  | 0.0259   | 680 |
| Myo5b         | myosin VB                                               | 1452298_a_at | -1.66 | 0.0105   | 681 |
| Mm.89400      |                                                         | 1447490_at   | -1.66 | 0.0017   | 682 |
| Myo1d         | myosin ID                                               | 1435046_at   | -1.66 | 0.0011   | 683 |
| Efhc2         | EF-hand domain (C-terminal) containing 2                | 1428638_at   | -1.66 | 0.0023   | 684 |
| Arhgap15      | Rho GTPase activating protein 15                        | 1429881_at   | -1.66 | 4.60E-05 | 685 |
| Cd34          | CD34 antigen                                            | 1416072_at   | 1.66  | 0.0032   | 686 |
| Arhgap26      | Rho GTPase activating protein 26                        | 1435694_at   | -1.66 | 4.20E-05 | 687 |
| Car4          | carbonic anhydrase 4                                    | 1418094_s_at | -1.66 | 0.0025   | 688 |
| Lin7a         | lin-7 homolog A (C. elegans)                            | 1438450_at   | 1.66  | 2.90E-05 | 689 |
| Synm          | synemin, intermediate filament protein                  | 1455610_at   | -1.65 | 8.50E-05 | 690 |
| Zfp64         | zinc finger protein 64                                  | 1440251_s_at | -1.65 | 0.0069   | 691 |
| 1110018H23Rik | RIKEN cDNA 1110018H23 gene                              | 1430194_at   | -1.65 | 0.0006   | 692 |
| 3830431G21Rik | RIKEN cDNA 3830431G21 gene                              | 1436035_at   | -1.65 | 0.0002   | 693 |
| Ankrd50       | ankyrin repeat domain 50                                | 1435880_at   | 1.65  | 0.0100   | 694 |
| Alcam         | activated leukocyte cell adhesion molecule              | 1426301_at   | -1.65 | 0.0003   | 695 |
| Mm.133499     |                                                         | 1440103_at   | -1.65 | 0.0019   | 696 |
| Atf3          | activating transcription factor 3                       | 1449363_at   | 1.65  | 0.0325   | 697 |
| 1110012J17Rik | RIKEN cDNA 1110012J17 gene                              | 1429053_at   | 1.65  | 0.0130   | 698 |
| Grid1         | glutamate receptor, ionotropic, delta 1                 | 1445779_at   | -1.65 | 0.0007   | 699 |
| Ifitm2        | interferon induced transmembrane protein 2              | 1417460_at   | 1.65  | 0.0024   | 700 |

|               |                                                                     |              |       |          |     |
|---------------|---------------------------------------------------------------------|--------------|-------|----------|-----|
| Olfm2         | olfactomedin 2                                                      | 1435790_at   | 1.65  | 0.0379   | 701 |
| 1455145_at    |                                                                     | 1455145_at   | -1.65 | 0.0081   | 702 |
| Dleu2         | deleted in lymphocytic leukemia, 2                                  | 1427411_s_at | 1.65  | 0.0053   | 703 |
| Shmt1         | serine hydroxymethyltransferase 1 (soluble)                         | 1425179_at   | -1.65 | 0.0100   | 704 |
| 1439779_at    |                                                                     | 1439779_at   | 1.65  | 0.0049   | 705 |
| Dpyd          | dihydropyrimidine dehydrogenase                                     | 1427945_at   | -1.65 | 4.70E-05 | 706 |
| 1456633_at    |                                                                     | 1456633_at   | -1.65 | 0.0015   | 707 |
| 1444778_at    |                                                                     | 1444778_at   | -1.65 | 0.0062   | 708 |
| 1460630_at    |                                                                     | 1460630_at   | -1.65 | 0.0012   | 709 |
| Tanc1         | tetratricopeptide repeat, ankyrin repeat and coiled-coil containing | 1446029_at   | 1.65  | 0.0164   | 710 |
| Fgl2          | fibrinogen-like protein 2                                           | 1421855_at   | 1.65  | 0.0258   | 711 |
| Magi1         | membrane associated guanylate kinase, WW and PDZ domain containing  | 1451893_s_at | -1.65 | 9.90E-05 | 712 |
| Cdkl1         | cyclin-dependent kinase-like 1 (CDC2-related kinase)                | 1429664_at   | -1.65 | 0.0093   | 713 |
| 4933427G17Rik | RIKEN cDNA 4933427G17 gene                                          | 1431904_at   | -1.64 | 0.0013   | 714 |
| Insm1         | insulinoma-associated 1                                             | 1421399_at   | 1.64  | 0.0079   | 715 |
| Gm12824       | predicted gene 12824                                                | 1459183_at   | -1.64 | 3.10E-05 | 716 |
| Btbd17        | BTB (POZ) domain containing 17                                      | 1428303_at   | 1.64  | 0.0024   | 717 |
| Cpne4         | copine IV                                                           | 1429443_at   | -1.64 | 0.0066   | 718 |
| Sncaip        | synuclein, alpha interacting protein (synphilin)                    | 1423499_at   | -1.64 | 0.0027   | 719 |
| Mm.372774     |                                                                     | 1442025_a_at | -1.64 | 0.0438   | 720 |
| Thsd7a        | thrombospondin, type I, domain containing 7A                        | 1456721_at   | -1.64 | 2.70E-05 | 721 |
| Foxk1         | forkhead box K1                                                     | 1434655_at   | -1.64 | 0.0038   | 722 |
| Rbp1          | retinol binding protein 1, cellular                                 | 1448754_at   | 1.64  | 0.0269   | 723 |
| Agrn          | agrin                                                               | 1426670_at   | 1.64  | 0.0002   | 724 |
| Fam101b       | family with sequence similarity 101, member B                       | 1456603_at   | 1.64  | 0.0068   | 725 |
| Gypc          | glycophorin C                                                       | 1423878_at   | -1.64 | 0.0002   | 726 |
| Socs3         | suppressor of cytokine signaling 3                                  | 1416576_at   | 1.64  | 0.0393   | 727 |

|               |                                                         |              |       |          |     |
|---------------|---------------------------------------------------------|--------------|-------|----------|-----|
| Rgs14         | regulator of G-protein signaling 14                     | 1419221_a_at | -1.64 | 8.00E-07 | 728 |
| Krt12         | keratin 12                                              | 1419231_s_at | -1.64 | 0.0394   | 729 |
| Pknox1        | Pbx/knotted 1 homeobox                                  | 1450172_at   | 1.64  | 0.0078   | 730 |
| Abcb10        | ATP-binding cassette, sub-family B (MDR/TAP), member 10 | 1416402_at   | -1.64 | 0.0090   | 731 |
| Gjb2          | gap junction protein, beta 2                            | 1423271_at   | 1.64  | 0.0462   | 732 |
| Lrrc16a       | leucine rich repeat containing 16A                      | 1451804_a_at | -1.64 | 0.0006   | 733 |
| Zcchc12       | zinc finger, CCHC domain containing 12                  | 1428434_at   | -1.64 | 0.0012   | 734 |
| Lpar4         | lysophosphatidic acid receptor 4                        | 1434186_at   | -1.64 | 0.0001   | 735 |
| 1457133_at    |                                                         | 1457133_at   | -1.64 | 0.0046   | 736 |
| 1435338_at    |                                                         | 1435338_at   | 1.64  | 0.0100   | 737 |
| 1437485_at    |                                                         | 1437485_at   | -1.64 | 0.0037   | 738 |
| Stat3         | signal transducer and activator of transcription 3      | 1460700_at   | 1.64  | 1.40E-05 | 739 |
| Ssbp3         | single-stranded DNA binding protein 3                   | 1425940_a_at | 1.64  | 0.0016   | 740 |
| Trdn          | triadin                                                 | 1426144_x_at | -1.64 | 1.00E-06 | 741 |
| Echdc2        | enoyl Coenzyme A hydratase domain containing 2          | 1425788_a_at | -1.63 | 1.60E-05 | 742 |
| Dkk3          | dickkopf homolog 3 ( <i>Xenopus laevis</i> )            | 1448669_at   | 1.63  | 0.0039   | 743 |
| 6330416G13Rik | RIKEN cDNA 6330416G13 gene                              | 1426315_a_at | 1.63  | 0.0022   | 744 |
| 1419874_x_at  |                                                         | 1419874_x_at | -1.63 | 0.0233   | 745 |
| 1455287_at    |                                                         | 1455287_at   | 1.63  | 0.0085   | 746 |
| Nfic          | nuclear factor I/C                                      | 1435527_at   | 1.63  | 0.0024   | 747 |
| 1424594_at    |                                                         | 1424594_at   | 1.63  | 0.0054   | 748 |
| Dtna          | dystrobrevin alpha                                      | 1425292_at   | 1.63  | 0.0001   | 749 |
| Foxc1         | forkhead box C1                                         | 1419486_at   | 1.63  | 0.0063   | 750 |
| Lamc2         | laminin, gamma 2                                        | 1421279_at   | 1.63  | 0.0034   | 751 |
| 1437759_at    |                                                         | 1437759_at   | 1.63  | 0.0027   | 752 |
| Pde4dip       | phosphodiesterase 4D interacting protein (myomegalin)   | 1433761_at   | 1.63  | 0.0026   | 753 |
| 5730409N24Rik | RIKEN cDNA 5730409N24 gene                              | 1430362_at   | -1.63 | 0.0371   | 754 |

|               |                                                         |              |       |          |     |
|---------------|---------------------------------------------------------|--------------|-------|----------|-----|
| C1ql2         | complement component 1, q subcomponent-like 2           | 1444687_at   | 1.63  | 0.0088   | 755 |
| Cav1          | caveolin 1, caveolae protein                            | 1449145_a_at | 1.63  | 0.0229   | 756 |
| Itpr1         | inositol 1,4,5-triphosphate receptor 1                  | 1457189_at   | -1.63 | 0.0025   | 757 |
| Inpp5a        | inositol polyphosphate-5-phosphatase A                  | 1433605_at   | 1.63  | 0.0002   | 758 |
| 3110035E14Rik | RIKEN cDNA 3110035E14 gene                              | 1428184_at   | -1.63 | 0.0107   | 759 |
| Egfl6         | EGF-like-domain, multiple 6                             | 1419332_at   | -1.63 | 0.0013   | 760 |
| Parva         | parvin, alpha                                           | 1431375_s_at | 1.63  | 0.0120   | 761 |
| Tgm2          | transglutaminase 2, C polypeptide                       | 1437277_x_at | 1.63  | 0.0132   | 762 |
| AV365231      |                                                         | 1442276_at   | 1.63  | 0.0006   | 763 |
| Ahnak         | AHNAK nucleoprotein (desmoyokin)                        | 1452217_at   | 1.62  | 0.0048   | 764 |
| 4922501L14Rik | RIKEN cDNA 4922501L14 gene                              | 1427501_at   | -1.62 | 0.0261   | 765 |
| Mdfic         | MyoD family inhibitor domain containing                 | 1427040_at   | 1.62  | 0.0066   | 766 |
| Mm.381420     |                                                         | 1435579_at   | -1.62 | 0.0027   | 767 |
| Zfx4          | zinc finger homeodomain 4                               | 1421433_at   | -1.62 | 0.0005   | 768 |
| 1441536_at    |                                                         | 1441536_at   | 1.62  | 0.0185   | 769 |
| 1438558_x_at  |                                                         | 1438558_x_at | -1.62 | 4.10E-05 | 770 |
| H2-Aa         | histocompatibility 2, class II antigen A, alpha         | 1438858_x_at | 1.62  | 0.0045   | 771 |
| Mm.381104     |                                                         | 1443744_at   | -1.62 | 0.0253   | 772 |
| Mm.270409     |                                                         | 1444616_x_at | -1.62 | 0.0096   | 773 |
| Camk1         | calcium/calmodulin-dependent protein kinase I           | 1417605_s_at | 1.62  | 5.30E-05 | 774 |
| 1429974_at    |                                                         | 1429974_at   | 1.62  | 0.0194   | 775 |
| Rasd2         | RASD family, member 2                                   | 1427344_s_at | 1.62  | 0.0222   | 776 |
| Abcc8         | ATP-binding cassette, sub-family C (CFTR/MRP), member 8 | 1455765_a_at | -1.62 | 0.0009   | 777 |
| Mm.132104     |                                                         | 1442551_at   | 1.62  | 0.0315   | 778 |
| Hist2h2bb     | histone cluster 2, H2bb                                 | 1425868_at   | -1.62 | 0.0007   | 779 |
| Nbl1          | neuroblastoma, suppression of tumorigenicity 1          | 1448428_at   | 1.62  | 0.0173   | 780 |
| Foxq1         | forkhead box Q1                                         | 1445572_at   | -1.62 | 0.0011   | 781 |

|               |                                                         |              |       |          |     |
|---------------|---------------------------------------------------------|--------------|-------|----------|-----|
| Clmn          | calmin                                                  | 1439117_at   | -1.62 | 0.0220   | 782 |
| Lrig1         | leucine-rich repeats and immunoglobulin-like domains 1  | 1434210_s_at | 1.61  | 0.0060   | 783 |
| Ablim3        | actin binding LIM protein family, member 3              | 1434013_at   | -1.61 | 0.0051   | 784 |
| Mme           | membrane metallo endopeptidase                          | 1455961_at   | -1.61 | 0.0451   | 785 |
| A230067G21Rik | RIKEN cDNA A230067G21 gene                              | 1445001_at   | -1.61 | 0.0254   | 786 |
| 1810031K17Rik | RIKEN cDNA 1810031K17 gene                              | 1427879_at   | 1.61  | 0.0461   | 787 |
| Abcb10        | ATP-binding cassette, sub-family B (MDR/TAP), member 10 | 1416403_at   | -1.61 | 0.0061   | 788 |
| Lin7a         | lin-7 homolog A (C. elegans)                            | 1456656_at   | 1.61  | 0.0006   | 789 |
| Hsph1         | heat shock 105kDa/110kDa protein 1                      | 1423566_a_at | 1.61  | 0.0391   | 790 |
| 1457708_at    |                                                         | 1457708_at   | -1.61 | 0.0056   | 791 |
| Kctd12        | potassium channel tetramerisation domain containing 12  | 1434881_s_at | -1.61 | 4.00E-06 | 792 |
| Fam101b       | family with sequence similarity 101, member B           | 1429764_at   | 1.61  | 0.0194   | 793 |
| Klhdc8a       | kelch domain containing 8A                              | 1424885_at   | -1.61 | 1.70E-06 | 794 |
| 1436279_at    |                                                         | 1436279_at   | 1.61  | 0.0342   | 795 |
| P2ry6         | pyrimidinergic receptor P2Y, G-protein coupled, 6       | 1425214_at   | 1.61  | 0.0025   | 796 |
| Crtac1        | cartilage acidic protein 1                              | 1452936_at   | 1.61  | 3.60E-06 | 797 |
| Lhfp12        | lipoma HMGIC fusion partner-like 2                      | 1434129_s_at | -1.61 | 0.0288   | 798 |
| Mm.376308     |                                                         | 1458967_at   | -1.61 | 0.0042   | 799 |
| Dgki          | diacylglycerol kinase, iota                             | 1439986_at   | 1.61  | 0.0079   | 800 |
| BB075541      |                                                         | 1459321_at   | 1.61  | 0.0450   | 801 |
| Gss           | glutathione synthetase                                  | 1441931_x_at | -1.61 | 3.10E-05 | 802 |
| Epha3         | Eph receptor A3                                         | 1425575_at   | 1.61  | 0.0027   | 803 |
| Prune2        | prune homolog 2 (Drosophila)                            | 1432198_at   | -1.60 | 0.0044   | 804 |
| Clmn          | calmin                                                  | 1429166_s_at | -1.60 | 0.0314   | 805 |
| Lrrc16a       | leucine rich repeat containing 16A                      | 1446892_at   | -1.60 | 0.0024   | 806 |
| Nrsn2         | neurensin 2                                             | 1434640_at   | -1.60 | 0.0008   | 807 |
| Lypd6         | LY6/PLAUR domain containing 6                           | 1456138_at   | -1.60 | 0.0139   | 808 |

|               |                                                                   |              |       |          |     |
|---------------|-------------------------------------------------------------------|--------------|-------|----------|-----|
| Aspg          | asparaginase homolog ( <i>S. cerevisiae</i> )                     | 1435036_at   | 1.60  | 0.0383   | 809 |
| Meig1         | meiosis expressed gene 1                                          | 1423410_at   | -1.60 | 8.50E-05 | 810 |
| Pcdh19        | protocadherin 19                                                  | 1437360_at   | -1.60 | 0.0091   | 811 |
| 1460440_at    |                                                                   | 1460440_at   | 1.60  | 0.0103   | 812 |
| Expi          | extracellular proteinase inhibitor                                | 1417160_s_at | -1.60 | 4.60E-05 | 813 |
| 5033430I15Rik | RIKEN cDNA 5033430I15 gene                                        | 1432509_at   | -1.60 | 9.10E-05 | 814 |
| Rspo1         | R-spondin homolog ( <i>Xenopus laevis</i> )                       | 1449319_at   | -1.60 | 2.90E-05 | 815 |
| Tmem158       | transmembrane protein 158                                         | 1428074_at   | 1.60  | 0.0008   | 816 |
| Tnnt2         | troponin T2, cardiac                                              | 1418726_a_at | -1.60 | 0.0006   | 817 |
| Ccdc74a       | coiled-coil domain containing 74A                                 | 1436104_a_at | -1.60 | 0.0058   | 818 |
| Tgm2          | transglutaminase 2, C polypeptide                                 | 1433428_x_at | 1.60  | 0.0134   | 819 |
| Krt12         | keratin 12                                                        | 1419230_at   | -1.60 | 0.0083   | 820 |
| BB291417      |                                                                   | 1458099_at   | -1.60 | 0.0238   | 821 |
| Khdrbs2       | KH domain containing, RNA binding, signal transduction associated | 1422117_s_at | -1.60 | 5.20E-08 | 822 |
| 1430460_at    |                                                                   | 1430460_at   | -1.60 | 0.0033   | 823 |
| 1700066D14Rik | RIKEN cDNA 1700066D14 gene                                        | 1439525_at   | 1.59  | 0.0127   | 824 |
| 4833432E10Rik | RIKEN cDNA 4833432E10 gene                                        | 1453387_at   | 1.59  | 0.0209   | 825 |
| Lhfp12        | lipoma HMGIC fusion partner-like 2                                | 1434130_at   | -1.59 | 0.0069   | 826 |
| Jag1          | jagged 1                                                          | 1434070_at   | -1.59 | 0.0003   | 827 |
| Fmod          | fibromodulin                                                      | 1438966_x_at | 1.59  | 0.0287   | 828 |
| 1441476_at    |                                                                   | 1441476_at   | 1.59  | 0.0010   | 829 |
| Flywch2       | FLYWCH family member 2                                            | 1438982_s_at | 1.59  | 0.0012   | 830 |
| Ppp1r14c      | protein phosphatase 1, regulatory (inhibitor) subunit 14c         | 1417701_at   | -1.59 | 0.0008   | 831 |
| Prox1         | prospero-related homeobox 1                                       | 1436464_at   | -1.59 | 0.0051   | 832 |
| Pcdh19        | protocadherin 19                                                  | 1444422_at   | -1.59 | 0.0063   | 833 |
| Dgkh          | diacylglycerol kinase, eta                                        | 1459906_at   | -1.59 | 0.0047   | 834 |
| Rragd         | Ras-related GTP binding D                                         | 1434909_at   | 1.59  | 0.0078   | 835 |

|               |                                                                    |              |       |          |     |
|---------------|--------------------------------------------------------------------|--------------|-------|----------|-----|
| Fstl4         | follistatin-like 4                                                 | 1440155_at   | 1.59  | 0.0006   | 836 |
| 5330409N07Rik | RIKEN cDNA 5330409N07 gene                                         | 1446643_at   | -1.59 | 0.0342   | 837 |
| Acta2         | actin, alpha 2, smooth muscle, aorta                               | 1416454_s_at | 1.59  | 0.0156   | 838 |
| Sparc         | secreted acidic cysteine rich glycoprotein                         | 1416589_at   | 1.59  | 0.0069   | 839 |
| Grasp         | GRP1 (general receptor for phosphoinositides 1)-associated scaffc  | 1460206_at   | 1.59  | 0.0403   | 840 |
| 1444235_at    |                                                                    | 1444235_at   | -1.59 | 9.30E-05 | 841 |
| BB229969      |                                                                    | 1457141_at   | -1.59 | 0.0247   | 842 |
| Malat1        | metastasis associated lung adenocarcinoma transcript 1 (non-codi   | 1436202_at   | 1.58  | 0.0101   | 843 |
| Cacng3        | calcium channel, voltage-dependent, gamma subunit 3                | 1450520_at   | 1.58  | 0.0002   | 844 |
| 1439313_at    |                                                                    | 1439313_at   | 1.58  | 0.0179   | 845 |
| Rgs10         | regulator of G-protein signalling 10                               | 1416882_at   | 1.58  | 0.0021   | 846 |
| Lpl           | lipoprotein lipase                                                 | 1431056_a_at | 1.58  | 0.0012   | 847 |
| Sorbs1        | sorbin and SH3 domain containing 1                                 | 1443983_at   | -1.58 | 0.0057   | 848 |
| Zfp462        | zinc finger protein 462                                            | 1456789_at   | -1.58 | 0.0010   | 849 |
| Cryz          | crystallin, zeta                                                   | 1438610_a_at | -1.58 | 8.90E-05 | 850 |
| BM120619      |                                                                    | 1459376_at   | 1.58  | 0.0096   | 851 |
| Serpinh1      | serine (or cysteine) peptidase inhibitor, clade H, member 1        | 1450843_a_at | 1.58  | 0.0352   | 852 |
| 1439153_at    |                                                                    | 1439153_at   | -1.58 | 0.0030   | 853 |
| Tmem159       | transmembrane protein 159                                          | 1426436_at   | -1.58 | 0.0016   | 854 |
| Rnf128        | ring finger protein 128                                            | 1449036_at   | -1.58 | 0.0002   | 855 |
| Ptgr1         | prostaglandin reductase 1                                          | 1417777_at   | -1.58 | 0.0076   | 856 |
| Mcm5          | minichromosome maintenance deficient 5, cell division cycle 46 (S. | 1436808_x_at | 1.58  | 0.0234   | 857 |
| 1455720_at    |                                                                    | 1455720_at   | 1.58  | 0.0175   | 858 |
| 6720460K10Rik | RIKEN cDNA 6720460K10 gene                                         | 1433338_at   | 1.58  | 0.0017   | 859 |
| Mm.365751     |                                                                    | 1447421_at   | -1.58 | 0.0096   | 860 |
| Ccdc85c       | coiled-coil domain containing 85C                                  | 1442999_at   | -1.58 | 0.0036   | 861 |
| Card6         | caspase recruitment domain family, member 6                        | 1436395_at   | -1.58 | 0.0074   | 862 |



|            |                                                                    |              |       |        |     |
|------------|--------------------------------------------------------------------|--------------|-------|--------|-----|
| Crabp2     | cellular retinoic acid binding protein II                          | 1451191_at   | 1.58  | 0.0198 | 863 |
| Rragd      | Ras-related GTP binding D                                          | 1431164_at   | 1.58  | 0.0147 | 864 |
| Ms4a6b     | membrane-spanning 4-domains, subfamily A, member 6B                | 1418826_at   | 1.58  | 0.0011 | 865 |
| Zfp804a    | zinc finger protein 804A                                           | 1457361_at   | 1.58  | 0.0359 | 866 |
| Dmd        | dystrophin, muscular dystrophy                                     | 1446156_at   | 1.57  | 0.0094 | 867 |
| Mm.381818  |                                                                    | 1446540_at   | -1.57 | 0.0006 | 868 |
| 1443315_at |                                                                    | 1443315_at   | 1.57  | 0.0191 | 869 |
| Sema4a     | sema domain, immunoglobulin domain (Ig), transmembrane domain (    | 1448110_at   | 1.57  | 0.0285 | 870 |
| Mm.89591   |                                                                    | 1438310_at   | -1.57 | 0.0052 | 871 |
| Itga4      | integrin alpha 4                                                   | 1457376_at   | -1.57 | 0.0012 | 872 |
| Ahcy12     | S-adenosylhomocysteine hydrolase-like 2                            | 1428195_at   | -1.57 | 0.0049 | 873 |
| Dnm3       | dynamamin 3                                                        | 1436875_at   | -1.57 | 0.0104 | 874 |
| Bbs12      | Bardet-Biedl syndrome 12 (human)                                   | 1447275_at   | -1.57 | 0.0021 | 875 |
| 1439629_at |                                                                    | 1439629_at   | 1.57  | 0.0003 | 876 |
| Bst2       | bone marrow stromal cell antigen 2                                 | 1424921_at   | 1.57  | 0.0167 | 877 |
| Rbpj       | recombination signal binding protein for immunoglobulin kappa J re | 1454896_at   | 1.57  | 0.0243 | 878 |
| Rasa1      | RAS p21 protein activator 1                                        | 1426478_at   | -1.57 | 0.0008 | 879 |
| Cacng2     | calcium channel, voltage-dependent, gamma subunit 2                | 1420596_at   | 1.57  | 0.0002 | 880 |
| Tubgcp2    | tubulin, gamma complex associated protein 2                        | 1455868_a_at | -1.57 | 0.0122 | 881 |
| Nrgn       | neurogranin                                                        | 1423231_at   | 1.57  | 0.0007 | 882 |
| Ccdc88c    | coiled-coil domain containing 88C                                  | 1442862_at   | 1.57  | 0.0014 | 883 |
| 1458742_at |                                                                    | 1458742_at   | 1.57  | 0.0220 | 884 |
| 1443554_at |                                                                    | 1443554_at   | 1.57  | 0.0051 | 885 |
| Cfh        | complement component factor h                                      | 1423153_x_at | 1.57  | 0.0081 | 886 |
| Mm.39691   |                                                                    | 1436449_at   | -1.57 | 0.0018 | 887 |
| Camkk2     | calcium/calmodulin-dependent protein kinase kinase 2, beta         | 1424475_at   | 1.57  | 0.0026 | 888 |
| Cd1d1      | CD1d1 antigen                                                      | 1449131_s_at | 1.57  | 0.0333 | 889 |

|               |                                                                      |              |       |          |     |
|---------------|----------------------------------------------------------------------|--------------|-------|----------|-----|
| Cyth1         | cytohesin 1                                                          | 1448997_at   | -1.57 | 0.0006   | 890 |
| 2900072G11Rik | RIKEN cDNA 2900072G11 gene                                           | 1429702_at   | -1.57 | 0.0283   | 891 |
| 1442039_at    |                                                                      | 1442039_at   | -1.57 | 0.0008   | 892 |
| Rnf128        | ring finger protein 128                                              | 1418318_at   | -1.57 | 0.0001   | 893 |
| Golm1         | golgi membrane protein 1                                             | 1415698_at   | -1.57 | 0.0001   | 894 |
| Ephb6         | Eph receptor B6                                                      | 1418051_at   | 1.57  | 0.0004   | 895 |
| Sox11         | SRY-box containing gene 11                                           | 1429051_s_at | 1.57  | 0.0004   | 896 |
| Frmd3         | FERM domain containing 3                                             | 1437075_at   | 1.57  | 0.0107   | 897 |
| Tagln3        | transgelin 3                                                         | 1450683_at   | 1.57  | 0.0040   | 898 |
| Kctd15        | potassium channel tetramerisation domain containing 15               | 1435339_at   | 1.57  | 0.0056   | 899 |
| 1437842_at    |                                                                      | 1437842_at   | 1.56  | 0.0336   | 900 |
| Rabgap1l      | RAB GTPase activating protein 1-like                                 | 1429197_s_at | 1.56  | 0.0216   | 901 |
| Sorcs2        | sortilin-related VPS10 domain containing receptor 2                  | 1419358_at   | -1.56 | 4.60E-08 | 902 |
| P2rx5         | purinergic receptor P2X, ligand-gated ion channel, 5                 | 1449433_at   | -1.56 | 0.0012   | 903 |
| 1440441_at    |                                                                      | 1440441_at   | -1.56 | 0.0109   | 904 |
| Ascl1         | achaete-scute complex homolog 1 (Drosophila)                         | 1437086_at   | -1.56 | 0.0011   | 905 |
| Magi1         | membrane associated guanylate kinase, WW and PDZ domain containing 1 | 1452369_at   | -1.56 | 0.0009   | 906 |
| Gstm6         | glutathione S-transferase, mu 6                                      | 1422072_a_at | -1.56 | 2.50E-05 | 907 |
| Npnt          | nephronectin                                                         | 1421429_a_at | -1.56 | 0.0124   | 908 |
| Faim          | Fas apoptotic inhibitory molecule                                    | 1418029_at   | -1.56 | 0.0001   | 909 |
| 1441966_at    |                                                                      | 1441966_at   | -1.56 | 0.0019   | 910 |
| Dkk3          | dickkopf homolog 3 (Xenopus laevis)                                  | 1417312_at   | 1.56  | 0.0097   | 911 |
| Col5a2        | collagen, type V, alpha 2                                            | 1422437_at   | 1.56  | 0.0109   | 912 |
| 1442586_at    |                                                                      | 1442586_at   | 1.56  | 7.70E-05 | 913 |
| Il1rapl2      | interleukin 1 receptor accessory protein-like 2                      | 1420462_at   | -1.56 | 0.0032   | 914 |
| Glce          | glucuronyl C5-epimerase                                              | 1428374_at   | 1.56  | 0.0107   | 915 |
| Pdzd3         | PDZ domain containing 3                                              | 1449330_at   | -1.56 | 0.0057   | 916 |

|            |                                                                       |              |       |          |     |
|------------|-----------------------------------------------------------------------|--------------|-------|----------|-----|
| Dnm3       | dynamamin 3                                                           | 1438801_at   | -1.56 | 0.0026   | 917 |
| 1426551_at |                                                                       | 1426551_at   | -1.56 | 0.0003   | 918 |
| Mirg       | miRNA containing gene                                                 | 1457030_at   | 1.56  | 0.0091   | 919 |
| Gnal       | guanine nucleotide binding protein, alpha stimulating, olfactory type | 1442021_at   | -1.56 | 0.0052   | 920 |
| Fn1        | fibronectin 1                                                         | 1426642_at   | 1.56  | 0.0373   | 921 |
| Unc5c      | unc-5 homolog C (C. elegans)                                          | 1419592_at   | 1.56  | 0.0478   | 922 |
| Slc29a4    | solute carrier family 29 (nucleoside transporters), member 4          | 1424900_at   | -1.56 | 0.0283   | 923 |
| Pnma2      | paraneoplastic antigen MA2                                            | 1435618_at   | -1.56 | 0.0015   | 924 |
| Mbd4       | methyl-CpG binding domain protein 4                                   | 1449490_at   | -1.56 | 0.0144   | 925 |
| 1455342_at |                                                                       | 1455342_at   | -1.56 | 0.0023   | 926 |
| Cfh        | complement component factor h                                         | 1450876_at   | 1.56  | 0.0081   | 927 |
| BM115786   |                                                                       | 1457324_at   | -1.56 | 0.0058   | 928 |
| Map3k4     | mitogen-activated protein kinase kinase kinase 4                      | 1459800_s_at | -1.56 | 0.0123   | 929 |
| 1435162_at |                                                                       | 1435162_at   | -1.55 | 0.0027   | 930 |
| 1437467_at |                                                                       | 1437467_at   | -1.55 | 0.0002   | 931 |
| Dpp6       | dipeptidylpeptidase 6                                                 | 1441538_at   | -1.55 | 0.0304   | 932 |
| Mm.371841  |                                                                       | 1441623_at   | 1.55  | 0.0068   | 933 |
| LOC552873  | hypothetical LOC552873                                                | 1457886_at   | -1.55 | 0.0292   | 934 |
| Lamb3      | laminin, beta 3                                                       | 1417812_a_at | -1.55 | 0.0004   | 935 |
| 1434832_at |                                                                       | 1434832_at   | 1.55  | 6.60E-05 | 936 |
| Mm.205593  |                                                                       | 1457512_at   | -1.55 | 0.0008   | 937 |
| Sparc      | secreted acidic cysteine rich glycoprotein                            | 1448392_at   | 1.55  | 0.0064   | 938 |
| Galns      | galactosamine (N-acetyl)-6-sulfate sulfatase                          | 1448744_at   | -1.55 | 0.0006   | 939 |
| Lrp1b      | low density lipoprotein-related protein 1B (deleted in tumors)        | 1447478_at   | -1.55 | 0.0001   | 940 |
| Lrp1b      | low density lipoprotein-related protein 1B (deleted in tumors)        | 1443131_at   | -1.55 | 0.0006   | 941 |
| Smc2       | structural maintenance of chromosomes 2                               | 1448635_at   | -1.55 | 0.0018   | 942 |
| 1455851_at |                                                                       | 1455851_at   | 1.55  | 0.0102   | 943 |

|               |                                                               |              |       |          |     |
|---------------|---------------------------------------------------------------|--------------|-------|----------|-----|
| 1441380_at    |                                                               | 1441380_at   | -1.55 | 5.00E-05 | 944 |
| Lepr          | leptin receptor                                               | 1425875_a_at | 1.55  | 0.0024   | 945 |
| Chi3l1        | chitinase 3-like 1                                            | 1451537_at   | 1.55  | 0.0350   | 946 |
| Flt3          | FMS-like tyrosine kinase 3                                    | 1419538_at   | -1.55 | 0.0070   | 947 |
| Adcy1         | adenylate cyclase 1                                           | 1456487_at   | -1.55 | 0.0019   | 948 |
| 1455214_at    |                                                               | 1455214_at   | -1.55 | 0.0070   | 949 |
| BB257461      |                                                               | 1459388_at   | -1.55 | 0.0274   | 950 |
| Fgf10         | fibroblast growth factor 10                                   | 1444344_at   | -1.55 | 0.0300   | 951 |
| D17H6S56E-5   | DNA segment, Chr 17, human D6S56E 5                           | 1417821_at   | 1.55  | 0.0204   | 952 |
| Cat           | catalase                                                      | 1416430_at   | 1.55  | 0.0143   | 953 |
| 1435763_at    |                                                               | 1435763_at   | -1.55 | 0.0027   | 954 |
| Adm           | adrenomedullin                                                | 1416077_at   | 1.55  | 0.0112   | 955 |
| Loxl1         | lysyl oxidase-like 1                                          | 1451978_at   | 1.55  | 2.80E-05 | 956 |
| 1700080G18Rik | RIKEN cDNA 1700080G18 gene                                    | 1430055_at   | 1.54  | 0.0047   | 957 |
| Snca          | synuclein, alpha                                              | 1446391_at   | -1.54 | 0.0094   | 958 |
| Flywch2       | FLYWCH family member 2                                        | 1424494_s_at | 1.54  | 0.0019   | 959 |
| A330008L17Rik | RIKEN cDNA A330008L17 gene                                    | 1439870_at   | -1.54 | 4.10E-05 | 960 |
| Tmem90b       | transmembrane protein 90B                                     | 1437392_at   | 1.54  | 0.0345   | 961 |
| Eif4ebp1      | eukaryotic translation initiation factor 4E binding protein 1 | 1434976_x_at | 1.54  | 0.0149   | 962 |
| AV024133      |                                                               | 1436787_x_at | -1.54 | 0.0003   | 963 |
| Hs3st1        | heparan sulfate (glucosamine) 3-O-sulfotransferase 1          | 1423450_a_at | -1.54 | 0.0010   | 964 |
| Prkab2        | protein kinase, AMP-activated, beta 2 non-catalytic subunit   | 1435875_at   | 1.54  | 0.0149   | 965 |
| Dleu7         | deleted in lymphocytic leukemia, 7                            | 1442180_at   | -1.54 | 0.0172   | 966 |
| Kntc1         | kinetochore associated 1                                      | 1435575_at   | -1.54 | 0.0027   | 967 |
| 1455967_at    |                                                               | 1455967_at   | -1.54 | 0.0043   | 968 |
| Zfp2          | zinc finger protein 2                                         | 1452025_a_at | -1.54 | 0.0098   | 969 |
| Grik4         | glutamate receptor, ionotropic, kainate 4                     | 1437681_at   | 1.54  | 9.30E-05 | 970 |

|            |                                                                      |              |       |          |     |
|------------|----------------------------------------------------------------------|--------------|-------|----------|-----|
| Unc5c      | unc-5 homolog C (C. elegans)                                         | 1439174_at   | 1.54  | 0.0428   | 971 |
| X99384     | cDNA sequence X99384                                                 | 1448134_at   | -1.54 | 0.0005   | 972 |
| Ppfia4     | protein tyrosine phosphatase, receptor type, f polypeptide (PTPRF    | 1428578_s_at | 1.54  | 0.0002   | 973 |
| 1455401_at |                                                                      | 1455401_at   | 1.54  | 0.0029   | 974 |
| Me3        | malic enzyme 3, NADP(+)-dependent, mitochondrial                     | 1429071_at   | -1.54 | 0.0002   | 975 |
| Oprd1      | opioid receptor, delta 1                                             | 1422121_at   | 1.54  | 0.0007   | 976 |
| Rnf19b     | ring finger protein 19B                                              | 1435226_at   | 1.54  | 0.0071   | 977 |
| Npnt       | nephronectin                                                         | 1426561_a_at | -1.54 | 0.0004   | 978 |
| Spsb1      | splA/ryanodine receptor domain and SOCS box containing 1             | 1420150_at   | 1.54  | 0.0086   | 979 |
| Camk1      | calcium/calmodulin-dependent protein kinase I                        | 1417604_at   | 1.54  | 0.0014   | 980 |
| Igsf9      | immunoglobulin superfamily, member 9                                 | 1420518_a_at | 1.54  | 0.0105   | 981 |
| Fam19a2    | family with sequence similarity 19, member A2                        | 1438007_at   | -1.54 | 0.0050   | 982 |
| Aff3       | AF4/FMR2 family, member 3                                            | 1430435_at   | 1.53  | 0.0013   | 983 |
| Rian       | RNA imprinted and accumulated in nucleus                             | 1428055_at   | 1.53  | 0.0234   | 984 |
| Cat        | catalase                                                             | 1416429_a_at | 1.53  | 0.0086   | 985 |
| Ccdc74a    | coiled-coil domain containing 74A                                    | 1436105_at   | -1.53 | 0.0035   | 986 |
| Tspan18    | tetraspanin 18                                                       | 1429856_at   | -1.53 | 0.0068   | 987 |
| 1440209_at |                                                                      | 1440209_at   | -1.53 | 0.0093   | 988 |
| Prkd1      | protein kinase D1                                                    | 1447623_s_at | -1.53 | 2.80E-06 | 989 |
| Pik3r1     | phosphatidylinositol 3-kinase, regulatory subunit, polypeptide 1 (p8 | 1425515_at   | 1.53  | 0.0360   | 990 |
| Ccdc21     | coiled-coil domain containing 21                                     | 1451212_at   | 1.53  | 2.80E-05 | 991 |
| Faim2      | Fas apoptotic inhibitory molecule 2                                  | 1455410_at   | -1.53 | 0.0266   | 992 |
| Meg3       | maternally expressed 3                                               | 1426758_s_at | 1.53  | 0.0032   | 993 |
| Mtrr       | 5-methyltetrahydrofolate-homocysteine methyltransferase reducta      | 1452110_at   | -1.53 | 0.0021   | 994 |
| Pla2g4a    | phospholipase A2, group IVA (cytosolic, calcium-dependent)           | 1448558_a_at | 1.53  | 0.0372   | 995 |
| Atp11c     | ATPase, class VI, type 11C                                           | 1445379_at   | 1.53  | 0.0075   | 996 |
| Hpcal1     | hippocalcin-like 1                                                   | 1448812_at   | -1.53 | 0.0009   | 997 |

|               |                                                         |              |       |          |      |
|---------------|---------------------------------------------------------|--------------|-------|----------|------|
| Hpca          | hippocalcin                                             | 1425833_a_at | 1.53  | 0.0194   | 998  |
| Numbl         | numb-like                                               | 1416491_at   | 1.53  | 0.0093   | 999  |
| Rasa1         | RAS p21 protein activator 1                             | 1426477_at   | -1.53 | 2.20E-06 | 1000 |
| Lgals8        | lectin, galactose binding, soluble 8                    | 1422662_at   | 1.53  | 0.0015   | 1001 |
| 1453994_at    |                                                         | 1453994_at   | -1.53 | 0.0032   | 1002 |
| Ppic          | peptidylprolyl isomerase C                              | 1416498_at   | -1.53 | 0.0030   | 1003 |
| Smc2          | structural maintenance of chromosomes 2                 | 1429658_a_at | -1.53 | 0.0183   | 1004 |
| 1700016K19Rik | RIKEN cDNA 1700016K19 gene                              | 1436593_at   | 1.53  | 0.0008   | 1005 |
| Mageb16       | melanoma antigen family B, 16                           | 1429701_at   | -1.53 | 0.0027   | 1006 |
| 1435787_at    |                                                         | 1435787_at   | -1.53 | 0.0006   | 1007 |
| Esyt3         | extended synaptotagmin-like protein 3                   | 1456481_at   | -1.53 | 0.0083   | 1008 |
| Lin7a         | lin-7 homolog A (C. elegans)                            | 1435805_at   | 1.53  | 2.40E-06 | 1009 |
| Ccne2         | cyclin E2                                               | 1422535_at   | -1.53 | 2.40E-06 | 1010 |
| Sv2c          | synaptic vesicle glycoprotein 2c                        | 1460142_at   | 1.53  | 0.0186   | 1011 |
| Map2k6        | mitogen-activated protein kinase kinase 6               | 1426850_a_at | -1.53 | 0.0005   | 1012 |
| Gprc5b        | G protein-coupled receptor, family C, group 5, member B | 1424613_at   | 1.53  | 2.20E-05 | 1013 |
| Gm3837        | predicted gene 3837                                     | 1445929_at   | -1.53 | 0.0013   | 1014 |
| 1452819_at    |                                                         | 1452819_at   | 1.53  | 0.0041   | 1015 |
| Onecut2       | one cut domain, family member 2                         | 1440005_at   | -1.53 | 0.0049   | 1016 |
| 1438540_at    |                                                         | 1438540_at   | -1.53 | 0.0184   | 1017 |
| Itih2         | inter-alpha trypsin inhibitor, heavy chain 2            | 1417618_at   | 1.52  | 0.0239   | 1018 |
| Dgkh          | diacylglycerol kinase, eta                              | 1457213_a_at | -1.52 | 0.0072   | 1019 |
| Hspa1b        | heat shock protein 1B                                   | 1427126_at   | -1.52 | 0.0269   | 1020 |
| Hsph1         | heat shock 105kDa/110kDa protein 1                      | 1425993_a_at | 1.52  | 0.0362   | 1021 |
| Tac2          | tachykinin 2                                            | 1419411_at   | 1.52  | 0.0041   | 1022 |
| Ctsh          | cathepsin H                                             | 1443814_x_at | 1.52  | 0.0363   | 1023 |
| Dnm3          | dynamamin 3                                             | 1436624_at   | -1.52 | 0.0073   | 1024 |

|            |                                                                    |              |       |          |      |
|------------|--------------------------------------------------------------------|--------------|-------|----------|------|
| Rgag4      | retrotransposon gag domain containing 4                            | 1435419_at   | 1.52  | 0.0027   | 1025 |
| Cidea      | cell death-inducing DNA fragmentation factor, alpha subunit-like e | 1417956_at   | -1.52 | 0.0006   | 1026 |
| Galnt3     | UDP-N-acetyl-alpha-D-galactosamine:polypeptide N-acetyl-galact     | 1417588_at   | -1.52 | 0.0015   | 1027 |
| Pnma2      | paraneoplastic antigen MA2                                         | 1437018_at   | -1.52 | 0.0011   | 1028 |
| Prtn3      | proteinase 3                                                       | 1419669_at   | 1.52  | 0.0197   | 1029 |
| Trpc5      | transient receptor potential cation channel, subfamily C, member 5 | 1422048_at   | -1.52 | 0.0012   | 1030 |
| Tox        | thymocyte selection-associated high mobility group box             | 1458974_at   | -1.52 | 0.0098   | 1031 |
| Myh3       | myosin, heavy polypeptide 3, skeletal muscle, embryonic            | 1427115_at   | -1.52 | 0.0121   | 1032 |
| Zfand2b    | zinc finger, AN1 type domain 2B                                    | 1424521_at   | 1.52  | 0.0030   | 1033 |
| Pcsk2      | proprotein convertase subtilisin/kexin type 2                      | 1448312_at   | 1.52  | 0.0048   | 1034 |
| Filip1l    | filamin A interacting protein 1-like                               | 1428861_at   | 1.52  | 0.0028   | 1035 |
| 1437401_at |                                                                    | 1437401_at   | 1.52  | 9.00E-05 | 1036 |
| Mgat5b     | mannoside acetylglucosaminyltransferase 5, isoenzyme B             | 1434531_at   | -1.52 | 0.0234   | 1037 |
| 1426476_at |                                                                    | 1426476_at   | -1.52 | 3.60E-05 | 1038 |
| Sdk2       | sidekick homolog 2 (chicken)                                       | 1430425_at   | -1.52 | 0.0003   | 1039 |
| Osbpl3     | oxysterol binding protein-like 3                                   | 1428484_at   | -1.52 | 0.0073   | 1040 |
| AV324524   |                                                                    | 1458180_at   | 1.52  | 0.0120   | 1041 |
| Pfkp       | phosphofructokinase, platelet                                      | 1416069_at   | 1.52  | 0.0013   | 1042 |
| Anxa4      | annexin A4                                                         | 1421223_a_at | 1.52  | 0.0357   | 1043 |
| Hspa1b     | heat shock protein 1B                                              | 1452318_a_at | -1.52 | 0.0084   | 1044 |
| 1455555_at |                                                                    | 1455555_at   | -1.52 | 0.0114   | 1045 |
| 1459791_at |                                                                    | 1459791_at   | 1.51  | 0.0030   | 1046 |
| Map3k4     | mitogen-activated protein kinase kinase kinase 4                   | 1421450_a_at | -1.51 | 0.0198   | 1047 |
| Slc24a4    | solute carrier family 24 (sodium/potassium/calcium exchanger), m   | 1435206_at   | 1.51  | 0.0026   | 1048 |
| Mm.443802  |                                                                    | 1440148_at   | -1.51 | 0.0227   | 1049 |
| Pros1      | protein S (alpha)                                                  | 1426246_at   | 1.51  | 0.0114   | 1050 |
| 1457235_at |                                                                    | 1457235_at   | -1.51 | 0.0057   | 1051 |

|               |                                                                     |              |       |          |      |
|---------------|---------------------------------------------------------------------|--------------|-------|----------|------|
| Pde2a         | phosphodiesterase 2A, cGMP-stimulated                               | 1452202_at   | 1.51  | 3.30E-05 | 1052 |
| Dab2          | disabled homolog 2 (Drosophila)                                     | 1420498_a_at | 1.51  | 0.0057   | 1053 |
| Tanc1         | tetratricopeptide repeat, ankyrin repeat and coiled-coil containing | 1452714_at   | 1.51  | 0.0080   | 1054 |
| Camkk2        | calcium/calmodulin-dependent protein kinase kinase 2, beta          | 1424474_a_at | 1.51  | 0.0057   | 1055 |
| Jag1          | jagged 1                                                            | 1421106_at   | -1.51 | 0.0050   | 1056 |
| Gm9853        | predicted gene 9853                                                 | 1434337_at   | -1.51 | 0.0365   | 1057 |
| Elmod1        | ELMO domain containing 1                                            | 1434083_a_at | -1.51 | 0.0105   | 1058 |
| Apod          | apolipoprotein D                                                    | 1444564_at   | 1.51  | 0.0418   | 1059 |
| Kcnd2         | potassium voltage-gated channel, Shal-related family, member 2      | 1446065_at   | -1.51 | 0.0135   | 1060 |
| Tgif2         | TGFB-induced factor homeobox 2                                      | 1434400_at   | 1.51  | 0.0387   | 1061 |
| 9330182L06Rik | RIKEN cDNA 9330182L06 gene                                          | 1435583_at   | -1.51 | 9.80E-05 | 1062 |
| Sox11         | SRY-box containing gene 11                                          | 1429372_at   | 1.51  | 0.0004   | 1063 |
| 1424476_at    |                                                                     | 1424476_at   | 1.51  | 0.0017   | 1064 |
| Lingo3        | leucine rich repeat and Ig domain containing 3                      | 1456838_at   | 1.51  | 0.0112   | 1065 |
| Pfkp          | phosphofructokinase, platelet                                       | 1430634_a_at | 1.51  | 0.0031   | 1066 |
| Matn4         | matrilin 4                                                          | 1418464_at   | -1.51 | 0.0008   | 1067 |
| Mm.381592     |                                                                     | 1443270_at   | -1.51 | 0.0152   | 1068 |
| 1439848_at    |                                                                     | 1439848_at   | -1.51 | 0.0029   | 1069 |
| Col18a1       | collagen, type XVIII, alpha 1                                       | 1426955_at   | 1.51  | 3.60E-05 | 1070 |
| Marveld2      | MARVEL (membrane-associating) domain containing 2                   | 1426914_at   | -1.51 | 0.0002   | 1071 |
| Iqsec3        | IQ motif and Sec7 domain 3                                          | 1437912_at   | 1.51  | 2.30E-05 | 1072 |
| Ogt           | O-linked N-acetylglucosamine (GlcNAc) transferase (UDP-N-acetyl     | 1436780_at   | 1.51  | 0.0029   | 1073 |
| 1434283_at    |                                                                     | 1434283_at   | -1.51 | 0.0215   | 1074 |
| Mm.375324     |                                                                     | 1443728_at   | -1.51 | 0.0136   | 1075 |
| Pde4d         | phosphodiesterase 4D, cAMP specific                                 | 1459311_at   | 1.51  | 0.0125   | 1076 |
| Fam123c       | family with sequence similarity 123, member C                       | 1436407_at   | -1.51 | 0.0007   | 1077 |
| Ccdc28b       | coiled coil domain containing 28B                                   | 1452937_s_at | -1.51 | 0.0002   | 1078 |



|              |                                                                      |              |       |          |      |
|--------------|----------------------------------------------------------------------|--------------|-------|----------|------|
| Gabra5       | gamma-aminobutyric acid (GABA) A receptor, subunit alpha 5           | 1433602_at   | -1.51 | 0.0341   | 1079 |
| Lrrn3        | leucine rich repeat protein 3, neuronal                              | 1434539_at   | -1.51 | 0.0110   | 1080 |
| Iigp1        | interferon inducible GTPase 1                                        | 1419042_at   | -1.51 | 0.0345   | 1081 |
| 1443982_at   |                                                                      | 1443982_at   | -1.51 | 0.0109   | 1082 |
| Trhr         | thyrotropin releasing hormone receptor                               | 1449572_at   | -1.50 | 0.0054   | 1083 |
| Col4a1       | collagen, type IV, alpha 1                                           | 1426348_at   | 1.50  | 0.0300   | 1084 |
| Ptger2       | prostaglandin E receptor 2 (subtype EP2)                             | 1449310_at   | -1.50 | 0.0257   | 1085 |
| 1455426_at   |                                                                      | 1455426_at   | 1.50  | 0.0009   | 1086 |
| Iqca         | IQ motif containing with AAA domain                                  | 1435992_at   | -1.50 | 0.0003   | 1087 |
| Kcnj10       | potassium inwardly-rectifying channel, subfamily J, member 10        | 1419601_at   | 1.50  | 0.0078   | 1088 |
| Grm3         | glutamate receptor, metabotropic 3                                   | 1430136_at   | -1.50 | 0.0003   | 1089 |
| Prr15        | proline rich 15                                                      | 1452473_at   | -1.50 | 0.0042   | 1090 |
| 1430303_at   |                                                                      | 1430303_at   | 1.50  | 0.0011   | 1091 |
| Mm.308721    |                                                                      | 1459675_at   | -1.50 | 0.0062   | 1092 |
| 1440845_at   |                                                                      | 1440845_at   | -1.50 | 0.0031   | 1093 |
| Prkcc        | protein kinase C, gamma                                              | 1421446_at   | 1.50  | 9.40E-05 | 1094 |
| 1435874_at   |                                                                      | 1435874_at   | 1.50  | 0.0202   | 1095 |
| Ier3         | immediate early response 3                                           | 1419647_a_at | 1.50  | 0.0361   | 1096 |
| Lck          | lymphocyte protein tyrosine kinase                                   | 1425396_a_at | -1.50 | 0.0037   | 1097 |
| Adamts15     | a disintegrin-like and metallopeptidase (reprolysin type) with throm | 1427056_at   | -1.50 | 0.0005   | 1098 |
| Pdlim5       | PDZ and LIM domain 5                                                 | 1421413_a_at | -1.50 | 0.0078   | 1099 |
| Fkbp7        | FK506 binding protein 7                                              | 1416803_at   | 1.50  | 0.0066   | 1100 |
| Pter         | phosphotriesterase related                                           | 1453578_at   | -1.50 | 0.0004   | 1101 |
| Foxp2        | forkhead box P2                                                      | 1438231_at   | 1.50  | 0.0047   | 1102 |
| 1455452_x_at |                                                                      | 1455452_x_at | -1.50 | 0.0090   | 1103 |
| Pxdn         | peroxidasin homolog (Drosophila)                                     | 1428259_at   | 1.50  | 2.60E-05 | 1104 |
| Ccdc67       | coiled-coil domain containing 67                                     | 1456555_at   | -1.50 | 0.0001   | 1105 |

|               |                                                                                |              |       |        |      |
|---------------|--------------------------------------------------------------------------------|--------------|-------|--------|------|
| Pcdh7         | protocadherin 7                                                                | 1449249_at   | 1.50  | 0.0070 | 1106 |
| Lrfn5         | leucine rich repeat and fibronectin type III domain containing 5               | 1454687_at   | -1.50 | 0.0038 | 1107 |
| Unc13c        | unc-13 homolog C (C. elegans)                                                  | 1437319_at   | 1.50  | 0.0209 | 1108 |
| E030049G20Rik | RIKEN cDNA E030049G20 gene                                                     | 1444086_at   | -1.50 | 0.0094 | 1109 |
| P4ha1         | procollagen-proline, 2-oxoglutarate 4-dioxygenase (proline 4-hydroxylase)      | 1452094_at   | 1.50  | 0.0163 | 1110 |
| Emilin1       | elastin microfibril interfacier 1                                              | 1416414_at   | 1.50  | 0.0007 | 1111 |
| 1430286_s_at  |                                                                                | 1430286_s_at | -1.49 | 0.0009 | 1112 |
| Pvt1          | plasmacytoma variant translocation 1                                           | 1452324_at   | -1.49 | 0.0001 | 1113 |
| Ms4a6d        | membrane-spanning 4-domains, subfamily A, member 6D                            | 1419599_s_at | 1.49  | 0.0265 | 1114 |
| Upk1b         | uroplakin 1B                                                                   | 1455464_x_at | -1.49 | 0.0016 | 1115 |
| 1453002_at    |                                                                                | 1453002_at   | 1.49  | 0.0007 | 1116 |
| Pdyn          | prodynorphin                                                                   | 1416266_at   | 1.49  | 0.0040 | 1117 |
| Mpp7          | membrane protein, palmitoylated 7 (MAGUK p55 subfamily member)                 | 1454158_at   | 1.49  | 0.0310 | 1118 |
| Fjx1          | four jointed box 1 (Drosophila)                                                | 1422733_at   | -1.49 | 0.0095 | 1119 |
| Krt2          | keratin 2                                                                      | 1427154_at   | 1.49  | 0.0363 | 1120 |
| 9930013L23Rik | RIKEN cDNA 9930013L23 gene                                                     | 1429987_at   | -1.49 | 0.0195 | 1121 |
| Fgf10         | fibroblast growth factor 10                                                    | 1420690_at   | -1.49 | 0.0288 | 1122 |
| Ifit1         | interferon-induced protein with tetratricopeptide repeats 1                    | 1450783_at   | 1.49  | 0.0456 | 1123 |
| Sox8          | SRY-box containing gene 8                                                      | 1435438_at   | -1.49 | 0.0079 | 1124 |
| Vav3          | vav 3 oncogene                                                                 | 1448600_s_at | -1.49 | 0.0016 | 1125 |
| Phlda1        | pleckstrin homology-like domain, family A, member 1                            | 1418835_at   | 1.49  | 0.0013 | 1126 |
| Snhg11        | small nucleolar RNA host gene 11 (non-protein coding)                          | 1434292_at   | 1.49  | 0.0373 | 1127 |
| Mm.379455     |                                                                                | 1437621_x_at | -1.49 | 0.0084 | 1128 |
| Grasp         | GRP1 (general receptor for phosphoinositides 1)-associated scaffolding protein | 1441894_s_at | 1.49  | 0.0223 | 1129 |
| Capn5         | calpain 5                                                                      | 1418671_at   | -1.49 | 0.0191 | 1130 |
| Lepr          | leptin receptor                                                                | 1425644_at   | 1.49  | 0.0384 | 1131 |
| BB354954      |                                                                                | 1444359_at   | 1.49  | 0.0001 | 1132 |

|               |                                                                         |              |       |          |      |
|---------------|-------------------------------------------------------------------------|--------------|-------|----------|------|
| Slc25a29      | solute carrier family 25 (mitochondrial carrier, palmitoylcarnitine tra | 1423980_at   | -1.49 | 0.0384   | 1133 |
| Actn2         | actinin alpha 2                                                         | 1448327_at   | -1.49 | 3.60E-05 | 1134 |
| Sulf1         | sulfatase 1                                                             | 1457402_at   | 1.49  | 0.0005   | 1135 |
| C1ql3         | C1q-like 3                                                              | 1425176_at   | -1.48 | 0.0151   | 1136 |
| Kras          | v-Ki-ras2 Kirsten rat sarcoma viral oncogene homolog                    | 1426229_s_at | 1.48  | 0.0003   | 1137 |
| Tspan18       | tetraspanin 18                                                          | 1437095_at   | -1.48 | 0.0043   | 1138 |
| 1436582_at    |                                                                         | 1436582_at   | -1.48 | 0.0176   | 1139 |
| Tnfaip3       | tumor necrosis factor, alpha-induced protein 3                          | 1433699_at   | 1.48  | 0.0019   | 1140 |
| Mm.202577     |                                                                         | 1457973_at   | -1.48 | 0.0096   | 1141 |
| Cd163         | CD163 antigen                                                           | 1419144_at   | 1.48  | 0.0344   | 1142 |
| Sema4a        | sema domain, immunoglobulin domain (Ig), transmembrane domain (         | 1438934_x_at | 1.48  | 0.0467   | 1143 |
| Dnm3          | dynamamin 3                                                             | 1445540_at   | -1.48 | 0.0032   | 1144 |
| Gls           | glutaminase                                                             | 1436299_at   | 1.48  | 1.50E-05 | 1145 |
| Adamts9       | a disintegrin-like and metallopeptidase (reprolysin type) with throm    | 1437785_at   | -1.48 | 0.0004   | 1146 |
| Limch1        | LIM and calponin homology domains 1                                     | 1435106_at   | -1.48 | 5.60E-07 | 1147 |
| Garnl4        | GTPase activating RANGAP domain-like 4                                  | 1434754_at   | -1.48 | 0.0329   | 1148 |
| Mmd           | monocyte to macrophage differentiation-associated                       | 1435645_at   | 1.48  | 0.0062   | 1149 |
| 1447551_x_at  |                                                                         | 1447551_x_at | 1.48  | 0.0287   | 1150 |
| Hes6          | hairy and enhancer of split 6 (Drosophila)                              | 1436050_x_at | -1.48 | 0.0430   | 1151 |
| C030005H24Rik | RIKEN cDNA C030005H24 gene                                              | 1432547_at   | -1.48 | 0.0181   | 1152 |
| Ccnt2         | cyclin T2                                                               | 1427088_at   | 1.48  | 0.0408   | 1153 |
| 1438428_at    |                                                                         | 1438428_at   | -1.48 | 0.0349   | 1154 |
| Bgn           | biglycan                                                                | 1437889_x_at | 1.48  | 0.0109   | 1155 |
| Grk5          | G protein-coupled receptor kinase 5                                     | 1449514_at   | -1.48 | 0.0107   | 1156 |
| 1439773_at    |                                                                         | 1439773_at   | -1.48 | 0.0299   | 1157 |
| Ust           | uronyl-2-sulfotransferase                                               | 1458897_at   | -1.48 | 0.0042   | 1158 |
| D8Ert82e      | DNA segment, Chr 8, ERATO Doi 82, expressed                             | 1442434_at   | 1.48  | 0.0145   | 1159 |

|               |                                                            |              |       |          |      |
|---------------|------------------------------------------------------------|--------------|-------|----------|------|
| Nptxr         | neuronal pentraxin receptor                                | 1434270_at   | 1.48  | 0.0001   | 1160 |
| Pcdhb3        | protocadherin beta 3                                       | 1420429_at   | 1.48  | 0.0002   | 1161 |
| Dbc1          | deleted in bladder cancer 1 (human)                        | 1417318_at   | 1.48  | 0.0044   | 1162 |
| Notch1        | Notch gene homolog 1 (Drosophila)                          | 1418634_at   | 1.48  | 0.0005   | 1163 |
| BB120334      |                                                            | 1446264_at   | -1.48 | 0.0007   | 1164 |
| 6430520M22Rik | RIKEN cDNA 6430520M22 gene                                 | 1457096_at   | 1.48  | 0.0197   | 1165 |
| Slc14a1       | solute carrier family 14 (urea transporter), member 1      | 1428114_at   | 1.48  | 0.0344   | 1166 |
| Map3k4        | mitogen-activated protein kinase kinase kinase 4           | 1447667_x_at | -1.48 | 0.0022   | 1167 |
| Cmya5         | cardiomyopathy associated 5                                | 1427312_at   | -1.48 | 9.40E-06 | 1168 |
| 1441087_at    |                                                            | 1441087_at   | -1.47 | 0.0012   | 1169 |
| Acer2         | alkaline ceramidase 2                                      | 1451355_at   | 1.47  | 0.0065   | 1170 |
| Ablim3        | actin binding LIM protein family, member 3                 | 1446069_at   | -1.47 | 0.0172   | 1171 |
| Scara5        | scavenger receptor class A, member 5 (putative)            | 1451204_at   | 1.47  | 0.0113   | 1172 |
| H2-D1         | histocompatibility 2, D region locus 1                     | 1427651_x_at | 1.47  | 0.0434   | 1173 |
| Hmgb3         | high mobility group box 3                                  | 1416155_at   | 1.47  | 0.0066   | 1174 |
| 1429400_at    |                                                            | 1429400_at   | 1.47  | 0.0011   | 1175 |
| Stmn1         | stathmin 1                                                 | 1415849_s_at | -1.47 | 0.0215   | 1176 |
| 1446144_at    |                                                            | 1446144_at   | -1.47 | 0.0054   | 1177 |
| BC023969      | cDNA sequence BC023969                                     | 1445226_at   | -1.47 | 0.0003   | 1178 |
| 1441914_x_at  |                                                            | 1441914_x_at | 1.47  | 0.0495   | 1179 |
| Obfc2a        | oligonucleotide/oligosaccharide-binding fold containing 2A | 1452203_at   | -1.47 | 0.0031   | 1180 |
| Hist3h2a      | histone cluster 3, H2a                                     | 1435866_s_at | -1.47 | 9.40E-05 | 1181 |
| 1448079_at    |                                                            | 1448079_at   | 1.47  | 0.0058   | 1182 |
| Tmem132a      | transmembrane protein 132A                                 | 1416845_at   | -1.47 | 0.0018   | 1183 |
| Stmn1         | stathmin 1                                                 | 1448113_at   | -1.47 | 0.0432   | 1184 |
| Gm10397       | predicted gene 10397                                       | 1435740_at   | 1.47  | 0.0017   | 1185 |
| Sntb2         | syntrophin, basic 2                                        | 1449840_at   | 1.47  | 0.0399   | 1186 |

|              |                                                 |              |       |          |      |
|--------------|-------------------------------------------------|--------------|-------|----------|------|
| 1446769_at   |                                                 | 1446769_at   | -1.47 | 9.60E-05 | 1187 |
| Itga7        | integrin alpha 7                                | 1418393_a_at | -1.47 | 8.80E-05 | 1188 |
| Ccdc28b      | coiled coil domain containing 28B               | 1459840_s_at | -1.47 | 0.0001   | 1189 |
| Tmsb10       | thymosin, beta 10                               | 1455946_x_at | 1.47  | 0.0049   | 1190 |
| Lrrn1        | leucine rich repeat protein 1, neuronal         | 1416053_at   | -1.47 | 0.0001   | 1191 |
| Ssbp3        | single-stranded DNA binding protein 3           | 1439136_at   | 1.47  | 0.0146   | 1192 |
| Chd3         | chromodomain helicase DNA binding protein 3     | 1428466_at   | -1.47 | 0.0040   | 1193 |
| Six6os1      | Six6 opposite strand transcript 1               | 1431393_at   | -1.47 | 0.0475   | 1194 |
| Cebpa        | CCAAT/enhancer binding protein (C/EBP), alpha   | 1418982_at   | 1.47  | 0.0019   | 1195 |
| Fam181b      | family with sequence similarity 181, member B   | 1442800_x_at | -1.47 | 0.0001   | 1196 |
| BG065719     |                                                 | 1456319_at   | 1.47  | 0.0102   | 1197 |
| Mm.39691     |                                                 | 1438889_at   | -1.47 | 0.0004   | 1198 |
| Unc13c       | unc-13 homolog C (C. elegans)                   | 1455304_at   | 1.47  | 0.0281   | 1199 |
| Dleu2        | deleted in lymphocytic leukemia, 2              | 1445831_at   | 1.47  | 0.0011   | 1200 |
| Zfp37        | zinc finger protein 37                          | 1449391_at   | -1.47 | 0.0004   | 1201 |
| Slitrk2      | SLIT and NTRK-like family, member 2             | 1441483_at   | -1.47 | 0.0006   | 1202 |
| 1434831_a_at |                                                 | 1434831_a_at | 1.47  | 3.60E-05 | 1203 |
|              | 1-Mar membrane-associated ring finger (C3HC4) 1 | 1434955_at   | -1.46 | 0.0164   | 1204 |
| Siae         | sialic acid acetyltransferase                   | 1416538_at   | 1.46  | 0.0218   | 1205 |
| Hdac1        | histone deacetylase 1                           | 1448246_at   | -1.46 | 2.40E-06 | 1206 |
| Ano3         | anoctamin 3                                     | 1443612_at   | 1.46  | 0.0005   | 1207 |
| 1431225_at   |                                                 | 1431225_at   | 1.46  | 0.0012   | 1208 |
| Limch1       | LIM and calponin homology domains 1             | 1445398_at   | -1.46 | 0.0131   | 1209 |
| 1446228_at   |                                                 | 1446228_at   | -1.46 | 0.0331   | 1210 |
| Dcbld1       | discoidin, CUB and LCCL domain containing 1     | 1418966_a_at | -1.46 | 0.0141   | 1211 |
| Cyth1        | cytohesin 1                                     | 1418183_a_at | -1.46 | 0.0212   | 1212 |
| 1456722_at   |                                                 | 1456722_at   | -1.46 | 0.0031   | 1213 |

|            |                                                                    |              |       |        |      |
|------------|--------------------------------------------------------------------|--------------|-------|--------|------|
| Itga1      | integrin alpha 1                                                   | 1455251_at   | 1.46  | 0.0447 | 1214 |
| 1442828_at |                                                                    | 1442828_at   | 1.46  | 0.0181 | 1215 |
| Pknox1     | Pbx/knotted 1 homeobox                                             | 1421233_at   | 1.46  | 0.0037 | 1216 |
| AI785329   |                                                                    | 1449602_at   | -1.46 | 0.0345 | 1217 |
| Mamdc2     | MAM domain containing 2                                            | 1453152_at   | 1.46  | 0.0226 | 1218 |
| Ecm1       | extracellular matrix protein 1                                     | 1448613_at   | 1.46  | 0.0359 | 1219 |
| 1434564_at |                                                                    | 1434564_at   | 1.46  | 0.0448 | 1220 |
| Abcc8      | ATP-binding cassette, sub-family C (CFTR/MRP), member 8            | 1457066_at   | -1.46 | 0.0037 | 1221 |
| Rasd2      | RASD family, member 2                                              | 1427343_at   | 1.46  | 0.0105 | 1222 |
| Twist1     | twist homolog 1 (Drosophila)                                       | 1418733_at   | -1.46 | 0.0006 | 1223 |
| Mm.434948  |                                                                    | 1445880_at   | -1.46 | 0.0308 | 1224 |
| Serpinh1   | serine (or cysteine) peptidase inhibitor, clade H, member 1        | 1456733_x_at | 1.46  | 0.0434 | 1225 |
| Gpr182     | G protein-coupled receptor 182                                     | 1418554_at   | 1.46  | 0.0154 | 1226 |
| Rapgef2    | Rap guanine nucleotide exchange factor (GEF) 2                     | 1459219_at   | -1.46 | 0.0069 | 1227 |
| Jak2       | Janus kinase 2                                                     | 1421065_at   | 1.46  | 0.0002 | 1228 |
| 1458550_at |                                                                    | 1458550_at   | -1.46 | 0.0131 | 1229 |
| Gm1337     | predicted gene 1337                                                | 1443287_at   | -1.46 | 0.0046 | 1230 |
| 1457061_at |                                                                    | 1457061_at   | 1.46  | 0.0004 | 1231 |
| Syce2      | synaptonemal complex central element protein 2                     | 1429270_a_at | -1.46 | 0.0171 | 1232 |
| Trp63      | transformation related protein 63                                  | 1418158_at   | -1.46 | 0.0263 | 1233 |
| Atp6v1c2   | ATPase, H <sup>+</sup> transporting, lysosomal V1 subunit C2       | 1430306_a_at | -1.46 | 0.0110 | 1234 |
| BB131963   |                                                                    | 1439265_at   | 1.46  | 0.0030 | 1235 |
| Col4a1     | collagen, type IV, alpha 1                                         | 1452035_at   | 1.46  | 0.0352 | 1236 |
| 1435926_at |                                                                    | 1435926_at   | 1.46  | 0.0242 | 1237 |
| Apol8      | apolipoprotein L 8                                                 | 1441054_at   | -1.45 | 0.0110 | 1238 |
| Trpa1      | transient receptor potential cation channel, subfamily A, member 1 | 1457164_at   | -1.45 | 0.0006 | 1239 |
| Itga1      | integrin alpha 1                                                   | 1441972_at   | 1.45  | 0.0252 | 1240 |

|            |                                                                       |              |       |        |      |
|------------|-----------------------------------------------------------------------|--------------|-------|--------|------|
| Slit3      | slit homolog 3 (Drosophila)                                           | 1440561_at   | -1.45 | 0.0013 | 1241 |
| Stx2       | syntaxin 2                                                            | 1418164_at   | -1.45 | 0.0029 | 1242 |
| Tm4sf1     | transmembrane 4 superfamily member 1                                  | 1450958_at   | 1.45  | 0.0085 | 1243 |
| Gnal       | guanine nucleotide binding protein, alpha stimulating, olfactory type | 1439957_at   | -1.45 | 0.0039 | 1244 |
| Kif21b     | kinesin family member 21B                                             | 1435772_at   | 1.45  | 0.0030 | 1245 |
| Zmat4      | zinc finger, matrin type 4                                            | 1433959_at   | -1.45 | 0.0131 | 1246 |
| 1435703_at |                                                                       | 1435703_at   | 1.45  | 0.0185 | 1247 |
| Gm2149     | predicted gene 2149                                                   | 1439657_at   | -1.45 | 0.0051 | 1248 |
| Mas1       | MAS1 oncogene                                                         | 1422936_at   | -1.45 | 0.0020 | 1249 |
| Gatsl2     | GATS protein-like 2                                                   | 1437252_at   | -1.45 | 0.0069 | 1250 |
| Aqp11      | aquaporin 11                                                          | 1455411_at   | -1.45 | 0.0159 | 1251 |
| Filip1     | filamin A interacting protein 1                                       | 1436650_at   | -1.45 | 0.0114 | 1252 |
| Cdh13      | cadherin 13                                                           | 1454015_a_at | -1.45 | 0.0046 | 1253 |
| Slc13a3    | solute carrier family 13 (sodium-dependent dicarboxylate transport    | 1438377_x_at | 1.45  | 0.0336 | 1254 |
| Mm.48676   |                                                                       | 1435120_at   | -1.45 | 0.0003 | 1255 |
| Rps6ka3    | ribosomal protein S6 kinase polypeptide 3                             | 1427299_at   | 1.45  | 0.0076 | 1256 |
| Sh3d19     | SH3 domain protein D19                                                | 1445781_at   | -1.45 | 0.0356 | 1257 |
| Acta1      | actin, alpha 1, skeletal muscle                                       | 1427735_a_at | 1.45  | 0.0448 | 1258 |
| Palm2      | paralemmin 2                                                          | 1441055_at   | -1.45 | 0.0007 | 1259 |
| Lgi1       | leucine-rich repeat LGI family, member 1                              | 1423183_at   | -1.45 | 0.0003 | 1260 |
| Elmo2      | engulfment and cell motility 2, ced-12 homolog (C. elegans)           | 1436011_at   | -1.45 | 0.0007 | 1261 |
| Dazl       | deleted in azoospermia-like                                           | 1449502_at   | -1.45 | 0.0059 | 1262 |
| Kremen1    | kringle containing transmembrane protein 1                            | 1435472_at   | 1.45  | 0.0134 | 1263 |
| 1458413_at |                                                                       | 1458413_at   | 1.45  | 0.0385 | 1264 |
| Mm.39155   |                                                                       | 1440056_at   | -1.45 | 0.0023 | 1265 |
| Rlbp1l2    | retinaldehyde binding protein 1-like 2                                | 1446157_at   | -1.45 | 0.0229 | 1266 |
| Tub        | tubby candidate gene                                                  | 1420925_at   | -1.45 | 0.0046 | 1267 |

|            |                                                                      |              |       |          |      |
|------------|----------------------------------------------------------------------|--------------|-------|----------|------|
| Limch1     | LIM and calponin homology domains 1                                  | 1435321_at   | -1.45 | 1.10E-05 | 1268 |
| 1433909_at |                                                                      | 1433909_at   | -1.45 | 0.0278   | 1269 |
| 1420836_at |                                                                      | 1420836_at   | 1.45  | 0.0394   | 1270 |
| Dot1l      | DOT1-like, histone H3 methyltransferase ( <i>S. cerevisiae</i> )     | 1457268_at   | 1.45  | 0.0036   | 1271 |
| Lgi2       | leucine-rich repeat LGI family, member 2                             | 1457040_at   | -1.45 | 0.0226   | 1272 |
| Sept3      | septin 3                                                             | 1439833_at   | -1.45 | 4.00E-06 | 1273 |
| L3mbtl3    | l(3)mbt-like 3 ( <i>Drosophila</i> )                                 | 1454882_at   | 1.45  | 0.0036   | 1274 |
| Tex9       | testis expressed gene 9                                              | 1453360_a_at | 1.45  | 0.0050   | 1275 |
| Mm.428426  |                                                                      | 1442406_at   | 1.44  | 0.0041   | 1276 |
| Gbp1       | guanylate binding protein 1                                          | 1420549_at   | 1.44  | 0.0450   | 1277 |
| Adm        | adrenomedullin                                                       | 1447839_x_at | 1.44  | 0.0047   | 1278 |
| Ctdspl     | CTD (carboxy-terminal domain, RNA polymerase II, polypeptide A)      | 1422510_at   | -1.44 | 0.0494   | 1279 |
| Cyth4      | cytohesin 4                                                          | 1460437_at   | -1.44 | 0.0001   | 1280 |
| Zfand2b    | zinc finger, AN1 type domain 2B                                      | 1451390_s_at | 1.44  | 0.0047   | 1281 |
| 1458183_at |                                                                      | 1458183_at   | -1.44 | 0.0212   | 1282 |
| Smoc2      | SPARC related modular calcium binding 2                              | 1431362_a_at | -1.44 | 0.0205   | 1283 |
| Prkar2b    | protein kinase, cAMP dependent regulatory, type II beta              | 1456475_s_at | 1.44  | 0.0002   | 1284 |
| Apcdd1     | adenomatosis polyposis coli down-regulated 1                         | 1449070_x_at | -1.44 | 0.0077   | 1285 |
| Cc2d2a     | coiled-coil and C2 domain containing 2A                              | 1436426_at   | -1.44 | 0.0183   | 1286 |
| Meg3       | maternally expressed 3                                               | 1452183_a_at | 1.44  | 0.0010   | 1287 |
| Serpib8    | serine (or cysteine) peptidase inhibitor, clade B, member 8          | 1458882_at   | 1.44  | 0.0479   | 1288 |
| Adamts9    | a disintegrin-like and metallopeptidase (reprolysin type) with throm | 1430352_at   | -1.44 | 0.0275   | 1289 |
| BB457124   |                                                                      | 1441220_at   | -1.44 | 0.0116   | 1290 |
| BG797916   |                                                                      | 1429977_at   | -1.44 | 0.0190   | 1291 |
| Nck2       | non-catalytic region of tyrosine kinase adaptor protein 2            | 1458432_at   | -1.44 | 0.0108   | 1292 |
| Lpl        | lipoprotein lipase                                                   | 1415904_at   | 1.44  | 0.0037   | 1293 |
| 1434211_at |                                                                      | 1434211_at   | -1.44 | 0.0157   | 1294 |



|               |                                                              |              |       |          |      |
|---------------|--------------------------------------------------------------|--------------|-------|----------|------|
| Samd12        | sterile alpha motif domain containing 12                     | 1458114_at   | 1.44  | 0.0274   | 1295 |
| Npm3          | nucleoplasmin 3                                              | 1423522_at   | -1.44 | 0.0020   | 1296 |
| Slit2         | slit homolog 2 (Drosophila)                                  | 1446392_at   | -1.44 | 0.0011   | 1297 |
| Agfg1         | ArfGAP with FG repeats 1                                     | 1452237_at   | 1.44  | 0.0093   | 1298 |
| Magi1         | membrane associated guanylate kinase, WW and PDZ domain cont | 1427246_at   | -1.44 | 0.0014   | 1299 |
| Rbm20         | RNA binding motif protein 20                                 | 1429024_at   | -1.44 | 0.0138   | 1300 |
| H2-Aa         | histocompatibility 2, class II antigen A, alpha              | 1452431_s_at | 1.44  | 0.0396   | 1301 |
| Rabgap1l      | RAB GTPase activating protein 1-like                         | 1434062_at   | 1.44  | 6.50E-06 | 1302 |
| B230120H23Rik | RIKEN cDNA B230120H23 gene                                   | 1435029_at   | -1.44 | 0.0052   | 1303 |
| 3100003M19Rik | RIKEN cDNA 3100003M19 gene                                   | 1431880_at   | -1.44 | 0.0034   | 1304 |
| 1459801_at    |                                                              | 1459801_at   | -1.44 | 0.0011   | 1305 |
| 2310051F07Rik | RIKEN cDNA 2310051F07 gene                                   | 1435636_at   | 1.44  | 0.0064   | 1306 |
| Mm.31331      |                                                              | 1436630_at   | -1.44 | 0.0320   | 1307 |
| Smoc1         | SPARC related modular calcium binding 1                      | 1448321_at   | 1.44  | 0.0132   | 1308 |
| Fam102b       | family with sequence similarity 102, member B                | 1455033_at   | -1.44 | 4.70E-06 | 1309 |
| Fam53b        | family with sequence similarity 53, member B                 | 1447176_at   | 1.44  | 0.0103   | 1310 |
| Rasgrf1       | RAS protein-specific guanine nucleotide-releasing factor 1   | 1422600_at   | -1.44 | 1.50E-05 | 1311 |
| Cat           | catalase                                                     | 1441413_at   | 1.44  | 0.0115   | 1312 |
| Ccl27a        | chemokine (C-C motif) ligand 27A                             | 1430375_a_at | -1.44 | 2.10E-08 | 1313 |
| Phgdh         | 3-phosphoglycerate dehydrogenase                             | 1426657_s_at | -1.44 | 0.0022   | 1314 |
| Zfp462        | zinc finger protein 462                                      | 1439106_at   | -1.44 | 0.0011   | 1315 |
| Aff1          | AF4/FMR2 family, member 1                                    | 1418135_at   | -1.44 | 0.0210   | 1316 |
| Fam65b        | family with sequence similarity 65, member B                 | 1438995_at   | -1.44 | 0.0167   | 1317 |
| Gas7          | growth arrest specific 7                                     | 1417859_at   | 1.44  | 0.0117   | 1318 |
| Lmo4          | LIM domain only 4                                            | 1439651_at   | 1.44  | 0.0027   | 1319 |
| Ssbp3         | single-stranded DNA binding protein 3                        | 1427917_s_at | 1.44  | 0.0015   | 1320 |
| Plbd2         | phospholipase B domain containing 2                          | 1423425_at   | 1.44  | 0.0462   | 1321 |

|               |                                                               |              |       |          |      |
|---------------|---------------------------------------------------------------|--------------|-------|----------|------|
| Cd38          | CD38 antigen                                                  | 1433741_at   | 1.44  | 0.0042   | 1322 |
| 1436239_at    |                                                               | 1436239_at   | 1.44  | 0.0103   | 1323 |
| 1700012A16Rik | RIKEN cDNA 1700012A16 gene                                    | 1429324_at   | -1.44 | 0.0493   | 1324 |
| Sgk1          | serum/glucocorticoid regulated kinase 1                       | 1416041_at   | 1.43  | 0.0315   | 1325 |
| 1439488_at    |                                                               | 1439488_at   | 1.43  | 0.0090   | 1326 |
| Lphn3         | latrophilin 3                                                 | 1428523_at   | 1.43  | 0.0368   | 1327 |
| Tgfb1         | transforming growth factor, beta induced                      | 1437463_x_at | 1.43  | 0.0096   | 1328 |
| Chsy3         | chondroitin sulfatase 3                                       | 1429417_at   | 1.43  | 0.0258   | 1329 |
| 1453330_at    |                                                               | 1453330_at   | 1.43  | 0.0011   | 1330 |
| Cald1         | caldesmon 1                                                   | 1445965_at   | -1.43 | 0.0070   | 1331 |
| Apcdd1        | adenomatosis polyposis coli down-regulated 1                  | 1454822_x_at | -1.43 | 0.0092   | 1332 |
| 9430091N11Rik | RIKEN cDNA 9430091N11 gene                                    | 1442352_at   | -1.43 | 0.0061   | 1333 |
| LOC626082     | hypothetical protein LOC626082                                | 1446181_at   | -1.43 | 0.0075   | 1334 |
| Ttyh1         | tweety homolog 1 (Drosophila)                                 | 1426617_a_at | 1.43  | 0.0015   | 1335 |
| Itga4         | integrin alpha 4                                              | 1421194_at   | -1.43 | 0.0006   | 1336 |
| Ppm1l         | protein phosphatase 1 (formerly 2C)-like                      | 1438012_at   | -1.43 | 0.0037   | 1337 |
| Slc9a5        | solute carrier family 9 (sodium/hydrogen exchanger), member 5 | 1455760_at   | -1.43 | 0.0083   | 1338 |
| Lphn2         | latrophilin 2                                                 | 1434111_at   | 1.43  | 0.0263   | 1339 |
| Hist3h2a      | histone cluster 3, H2a                                        | 1455712_at   | -1.43 | 3.60E-06 | 1340 |
| C77406        | expressed sequence C77406                                     | 1442500_at   | 1.43  | 0.0470   | 1341 |
| Prkg2         | protein kinase, cGMP-dependent, type II                       | 1435460_at   | -1.43 | 0.0104   | 1342 |
| Samd14        | sterile alpha motif domain containing 14                      | 1454630_at   | -1.43 | 0.0111   | 1343 |
| Gm7420        | predicted gene 7420                                           | 1444993_at   | -1.43 | 0.0444   | 1344 |
| Pdlim5        | PDZ and LIM domain 5                                          | 1442710_at   | -1.43 | 0.0012   | 1345 |
| BB271581      |                                                               | 1439888_at   | 1.43  | 0.0066   | 1346 |
| Rlbp1l2       | retinaldehyde binding protein 1-like 2                        | 1437292_at   | -1.43 | 0.0004   | 1347 |
| Ddo           | D-aspartate oxidase                                           | 1439096_at   | 1.43  | 0.0088   | 1348 |

|               |                                                                    |              |       |          |      |
|---------------|--------------------------------------------------------------------|--------------|-------|----------|------|
| Kcnp4         | Kv channel interacting protein 4                                   | 1437631_at   | -1.43 | 0.0210   | 1349 |
| Mm.83593      |                                                                    | 1441037_at   | -1.43 | 0.0169   | 1350 |
| Dusp15        | dual specificity phosphatase-like 15                               | 1426189_at   | 1.43  | 0.0021   | 1351 |
| Nos1ap        | nitric oxide synthase 1 (neuronal) adaptor protein                 | 1430442_at   | -1.43 | 0.0026   | 1352 |
| Upk1b         | uroplakin 1B                                                       | 1439760_x_at | -1.43 | 8.70E-05 | 1353 |
| C030009J22Rik | RIKEN cDNA C030009J22 gene                                         | 1458386_at   | 1.43  | 0.0099   | 1354 |
| AV254043      |                                                                    | 1439944_at   | -1.43 | 0.0055   | 1355 |
| Slit2         | slit homolog 2 (Drosophila)                                        | 1442322_at   | -1.43 | 0.0053   | 1356 |
| 1700019E19Rik | RIKEN cDNA 1700019E19 gene                                         | 1432494_a_at | 1.43  | 0.0038   | 1357 |
| Gm8350        | predicted gene 8350                                                | 1447550_at   | -1.43 | 0.0005   | 1358 |
| Alcam         | activated leukocyte cell adhesion molecule                         | 1426300_at   | -1.43 | 0.0031   | 1359 |
| Mpzl2         | myelin protein zero-like 2                                         | 1448265_x_at | 1.43  | 0.0126   | 1360 |
| Ctsc          | cathepsin C                                                        | 1416382_at   | 1.43  | 0.0446   | 1361 |
| Gmpr          | guanosine monophosphate reductase                                  | 1448530_at   | -1.43 | 6.00E-07 | 1362 |
| Gm4988        | predicted gene 4988                                                | 1446174_at   | -1.43 | 0.0499   | 1363 |
| Hace1         | HECT domain and ankyrin repeat containing, E3 ubiquitin protein li | 1452278_a_at | -1.43 | 0.0013   | 1364 |
| Nptxr         | neuronal pentraxin receptor                                        | 1421181_at   | 1.43  | 4.90E-05 | 1365 |
| Rgl1          | ral guanine nucleotide dissociation stimulator,-like 1             | 1440662_at   | -1.43 | 0.0057   | 1366 |
| Hpca          | hippocalcin                                                        | 1450930_at   | 1.43  | 0.0157   | 1367 |
| 1458469_at    |                                                                    | 1458469_at   | -1.43 | 0.0359   | 1368 |
| Map3k4        | mitogen-activated protein kinase kinase kinase 4                   | 1450253_a_at | -1.43 | 0.0072   | 1369 |
| Phgdh         | 3-phosphoglycerate dehydrogenase                                   | 1454714_x_at | -1.43 | 0.0062   | 1370 |
| Prkd1         | protein kinase D1                                                  | 1422673_at   | -1.43 | 0.0003   | 1371 |
| Kcnf1         | potassium voltage-gated channel, subfamily F, member 1             | 1441300_at   | -1.43 | 0.0021   | 1372 |
| 1446511_at    |                                                                    | 1446511_at   | -1.43 | 0.0081   | 1373 |
| Bin3          | bridging integrator 3                                              | 1417691_at   | 1.43  | 0.0040   | 1374 |
| Tox           | thymocyte selection-associated high mobility group box             | 1425484_at   | -1.43 | 0.0010   | 1375 |

|              |                                                 |              |       |          |      |
|--------------|-------------------------------------------------|--------------|-------|----------|------|
| Cxcr7        | chemokine (C-X-C motif) receptor 7              | 1417625_s_at | -1.42 | 0.0030   | 1376 |
| Gls2         | glutaminase 2 (liver, mitochondrial)            | 1435245_at   | 1.42  | 0.0126   | 1377 |
| Ptpnc        | protein tyrosine phosphatase, receptor type, C  | 1422124_a_at | 1.42  | 0.0483   | 1378 |
| Phf13        | PHD finger protein 13                           | 1455175_at   | 1.42  | 0.0101   | 1379 |
| Col18a1      | collagen, type XVIII, alpha 1                   | 1418237_s_at | 1.42  | 0.0004   | 1380 |
| 1459961_a_at |                                                 | 1459961_a_at | 1.42  | 0.0086   | 1381 |
| Itpk1        | inositol 1,3,4-triphosphate 5/6 kinase          | 1426733_at   | 1.42  | 0.0053   | 1382 |
| Pde2a        | phosphodiesterase 2A, cGMP-stimulated           | 1447707_s_at | 1.42  | 1.90E-06 | 1383 |
| Irgm1        | immunity-related GTPase family M member 1       | 1418825_at   | 1.42  | 0.0268   | 1384 |
| Arpp19       | cAMP-regulated phosphoprotein 19                | 1450685_at   | 1.42  | 1.10E-06 | 1385 |
| Susd4        | sushi domain containing 4                       | 1424221_at   | 1.42  | 0.0093   | 1386 |
| Hrasls       | HRAS-like suppressor                            | 1422919_at   | 1.42  | 0.0014   | 1387 |
| Pdgfd        | platelet-derived growth factor, D polypeptide   | 1456532_at   | 1.42  | 0.0053   | 1388 |
| Mm.449687    |                                                 | 1446565_at   | 1.42  | 0.0010   | 1389 |
| Rtn4r1       | reticulon 4 receptor-like 1                     | 1455664_at   | 1.42  | 0.0127   | 1390 |
| 1427162_a_at |                                                 | 1427162_a_at | 1.42  | 0.0141   | 1391 |
| Kirrel3      | kin of IRRE like 3 (Drosophila)                 | 1452728_at   | -1.42 | 0.0003   | 1392 |
| Tmcc3        | transmembrane and coiled coil domains 3         | 1451794_at   | 1.42  | 0.0016   | 1393 |
| Nsg2         | neuron specific gene family member 2            | 1416107_at   | -1.42 | 0.0020   | 1394 |
| 1452544_x_at |                                                 | 1452544_x_at | 1.42  | 0.0284   | 1395 |
| D7Ert558e    | DNA segment, Chr 7, ERATO Doi 558, expressed    | 1458769_at   | -1.42 | 0.0002   | 1396 |
| Ache         | acetylcholinesterase                            | 1422635_at   | 1.42  | 0.0102   | 1397 |
| Nr3c2        | nuclear receptor subfamily 3, group C, member 2 | 1435991_at   | -1.42 | 0.0131   | 1398 |
| Stxbp3a      | syntaxin binding protein 3A                     | 1416653_at   | 1.42  | 0.0010   | 1399 |
| Car10        | carbonic anhydrase 10                           | 1424547_at   | 1.42  | 0.0220   | 1400 |
| 1429918_at   |                                                 | 1429918_at   | -1.42 | 5.30E-06 | 1401 |
| Ctsh         | cathepsin H                                     | 1418365_at   | 1.42  | 0.0390   | 1402 |

|               |                                                               |              |       |        |      |
|---------------|---------------------------------------------------------------|--------------|-------|--------|------|
| 1435940_at    |                                                               | 1435940_at   | -1.42 | 0.0334 | 1403 |
| Ccl5          | chemokine (C-C motif) ligand 5                                | 1418126_at   | 1.42  | 0.0032 | 1404 |
| BG076014      |                                                               | 1445214_at   | 1.42  | 0.0111 | 1405 |
| Tnfrsf1a      | tumor necrosis factor receptor superfamily, member 1a         | 1417291_at   | 1.42  | 0.0454 | 1406 |
| Nuf2          | NUF2, NDC80 kinetochore complex component, homolog (S. cerevi | 1430811_a_at | -1.42 | 0.0073 | 1407 |
| Slco5a1       | solute carrier organic anion transporter family, member 5A1   | 1440874_at   | 1.42  | 0.0075 | 1408 |
| Timp3         | tissue inhibitor of metalloproteinase 3                       | 1449334_at   | 1.42  | 0.0049 | 1409 |
| 1810041L15Rik | RIKEN cDNA 1810041L15 gene                                    | 1429440_at   | -1.42 | 0.0039 | 1410 |
| Srgn          | serglycin                                                     | 1417426_at   | 1.42  | 0.0229 | 1411 |
| Crtac1        | cartilage acidic protein 1                                    | 1457474_at   | 1.42  | 0.0004 | 1412 |
| Susd4         | sushi domain containing 4                                     | 1444540_at   | 1.42  | 0.0366 | 1413 |
| Pde4b         | phosphodiesterase 4B, cAMP specific                           | 1422474_at   | 1.41  | 0.0012 | 1414 |
| 1434592_at    |                                                               | 1434592_at   | -1.41 | 0.0051 | 1415 |
| Acbd7         | acyl-Coenzyme A binding domain containing 7                   | 1430107_at   | -1.41 | 0.0283 | 1416 |
| Phgdh         | 3-phosphoglycerate dehydrogenase                              | 1456471_x_at | -1.41 | 0.0154 | 1417 |
| Lsm11         | U7 snRNP-specific Sm-like protein LSM11                       | 1439578_at   | 1.41  | 0.0256 | 1418 |
| Sept6         | septin 6                                                      | 1420876_a_at | 1.41  | 0.0009 | 1419 |
| Nptxr         | neuronal pentraxin receptor                                   | 1450147_at   | 1.41  | 0.0002 | 1420 |
| Sh3bgr        | SH3-binding domain glutamic acid-rich protein                 | 1422644_at   | 1.41  | 0.0223 | 1421 |
| 2010300C02Rik | RIKEN cDNA 2010300C02 gene                                    | 1452861_at   | -1.41 | 0.0030 | 1422 |
| Mm.385245     |                                                               | 1458697_at   | -1.41 | 0.0270 | 1423 |
| Hist2h2be     | histone cluster 2, H2be                                       | 1447854_s_at | -1.41 | 0.0315 | 1424 |
| Slc25a30      | solute carrier family 25, member 30                           | 1420835_at   | 1.41  | 0.0212 | 1425 |
| Btbd3         | BTB (POZ) domain containing 3                                 | 1425660_at   | -1.41 | 0.0387 | 1426 |
| 1455688_at    |                                                               | 1455688_at   | 1.41  | 0.0041 | 1427 |
| Tiam2         | T-cell lymphoma invasion and metastasis 2                     | 1420146_at   | -1.41 | 0.0042 | 1428 |
| Notch1        | Notch gene homolog 1 (Drosophila)                             | 1418633_at   | 1.41  | 0.0008 | 1429 |

|               |                                                         |              |       |          |      |
|---------------|---------------------------------------------------------|--------------|-------|----------|------|
| NM_133929     |                                                         | 1449056_at   | 1.41  | 5.70E-06 | 1430 |
| Nmb           | neuromedin B                                            | 1419405_at   | -1.41 | 0.0047   | 1431 |
| 1429688_at    |                                                         | 1429688_at   | -1.41 | 0.0193   | 1432 |
| Klf9          | Kruppel-like factor 9                                   | 1436763_a_at | 1.41  | 0.0002   | 1433 |
| 1449553_at    |                                                         | 1449553_at   | -1.41 | 1.50E-06 | 1434 |
| AV165624      |                                                         | 1430279_at   | -1.41 | 0.0317   | 1435 |
| Itga1         | integrin alpha 1                                        | 1453188_at   | 1.41  | 0.0034   | 1436 |
| 1441079_at    |                                                         | 1441079_at   | -1.41 | 0.0080   | 1437 |
| Tmtc4         | transmembrane and tetratricopeptide repeat containing 4 | 1432360_a_at | -1.41 | 0.0005   | 1438 |
| Mm.82621      |                                                         | 1441066_at   | -1.41 | 0.0007   | 1439 |
| Dhx40         | DEAH (Asp-Glu-Ala-His) box polypeptide 40               | 1428267_at   | -1.41 | 0.0012   | 1440 |
| Dusp26        | dual specificity phosphatase 26 (putative)              | 1425848_a_at | 1.41  | 0.0001   | 1441 |
| Sbno2         | strawberry notch homolog 2 (Drosophila)                 | 1443721_x_at | 1.41  | 0.0291   | 1442 |
| Tcfcp2l1      | transcription factor CP2-like 1                         | 1418091_at   | 1.41  | 0.0113   | 1443 |
| 1444701_at    |                                                         | 1444701_at   | 1.41  | 0.0021   | 1444 |
| 9030224M15Rik | RIKEN cDNA 9030224M15 gene                              | 1439689_at   | 1.41  | 0.0307   | 1445 |
| Tpm2          | tropomyosin 2, beta                                     | 1419738_a_at | 1.41  | 0.0077   | 1446 |
| Spg21         | spastic paraplegia 21 homolog (human)                   | 1451036_at   | 1.41  | 0.0018   | 1447 |
| Dtd1          | D-tyrosyl-tRNA deacylase 1 homolog (S. cerevisiae)      | 1451040_at   | -1.41 | 0.0014   | 1448 |
| Ccnb1ip1      | cyclin B1 interacting protein 1                         | 1435998_at   | 1.41  | 0.0068   | 1449 |
| Pvrl1         | poliovirus receptor-related 1                           | 1440131_at   | 1.41  | 0.0083   | 1450 |
| Ensa          | endosulfine alpha                                       | 1428620_at   | 1.41  | 0.0052   | 1451 |
| Cks1b         | CDC28 protein kinase 1b                                 | 1416698_a_at | 1.41  | 0.0079   | 1452 |
| 6430547I21Rik | RIKEN cDNA 6430547I21 gene                              | 1455537_at   | -1.41 | 0.0245   | 1453 |
| Sfxn2         | sideroflexin 2                                          | 1435896_at   | -1.41 | 0.0312   | 1454 |
| Mm.288015     |                                                         | 1442068_at   | 1.41  | 0.0008   | 1455 |
| Bzw2          | basic leucine zipper and W2 domains 2                   | 1443227_at   | -1.41 | 0.0100   | 1456 |

|               |                                                                    |              |       |          |      |
|---------------|--------------------------------------------------------------------|--------------|-------|----------|------|
| Mm.355811     |                                                                    | 1446474_at   | -1.41 | 0.0177   | 1457 |
| C230057M02Rik | RIKEN cDNA C230057M02 gene                                         | 1456364_at   | -1.41 | 0.0235   | 1458 |
| Slc16a2       | solute carrier family 16 (monocarboxylic acid transporters), membe | 1418445_at   | -1.41 | 0.0075   | 1459 |
| Sema3c        | sema domain, immunoglobulin domain (Ig), short basic domain, secr  | 1429348_at   | 1.41  | 6.70E-05 | 1460 |
| 1433854_at    |                                                                    | 1433854_at   | 1.41  | 0.0139   | 1461 |
| Sntb2         | syntrophin, basic 2                                                | 1436986_at   | 1.41  | 0.0454   | 1462 |
| BB046190      |                                                                    | 1458045_at   | 1.41  | 0.0424   | 1463 |
| 1810041L15Rik | RIKEN cDNA 1810041L15 gene                                         | 1455515_at   | -1.41 | 0.0005   | 1464 |
| A430108G06Rik | RIKEN cDNA A430108G06 gene                                         | 1444137_at   | 1.41  | 0.0287   | 1465 |
| Pde4b         | phosphodiesterase 4B, cAMP specific                                | 1422473_at   | 1.41  | 0.0006   | 1466 |
| 1437579_at    |                                                                    | 1437579_at   | -1.41 | 0.0191   | 1467 |
| Extl2         | exostoses (multiple)-like 2                                        | 1422539_at   | -1.41 | 0.0021   | 1468 |
| Jak2          | Janus kinase 2                                                     | 1421066_at   | 1.41  | 4.70E-05 | 1469 |
| Sgtb          | small glutamine-rich tetratricopeptide repeat (TPR)-containing, be | 1451529_at   | 1.41  | 0.0023   | 1470 |
| Ust           | uronyl-2-sulfotransferase                                          | 1437293_x_at | -1.41 | 4.10E-06 | 1471 |
| Paqr6         | progesterin and adipoQ receptor family member VI                   | 1455216_at   | 1.41  | 0.0005   | 1472 |
| 1419827_s_at  |                                                                    | 1419827_s_at | 1.40  | 0.0395   | 1473 |
| Msh3          | mutS homolog 3 (E. coli)                                           | 1424166_at   | -1.40 | 2.60E-05 | 1474 |
| D7Wsu130e     | DNA segment, Chr 7, Wayne State University 130, expressed          | 1458040_at   | -1.40 | 0.0122   | 1475 |
| Asap1         | ArfGAP with SH# domain, ankyrin repeat and PH domain1              | 1425572_a_at | 1.40  | 0.0003   | 1476 |
| Hrsp12        | heat-responsive protein 12                                         | 1428326_s_at | 1.40  | 0.0270   | 1477 |
| 1459253_at    |                                                                    | 1459253_at   | 1.40  | 0.0453   | 1478 |
| Dnaja4        | DnaJ (Hsp40) homolog, subfamily A, member 4                        | 1418591_at   | 1.40  | 0.0008   | 1479 |
| Bcor          | BCL6 interacting corepressor                                       | 1429438_at   | 1.40  | 0.0489   | 1480 |
| Rilpl1        | Rab interacting lysosomal protein-like 1                           | 1447852_x_at | 1.40  | 0.0124   | 1481 |
| Limd2         | LIM domain containing 2                                            | 1460738_at   | -1.40 | 0.0033   | 1482 |
| Cela1         | chymotrypsin-like elastase family, member 1                        | 1423693_at   | 1.40  | 0.0399   | 1483 |

|               |                                                                    |              |       |          |      |
|---------------|--------------------------------------------------------------------|--------------|-------|----------|------|
| Ankrd57       | ankyrin repeat domain 57                                           | 1454736_at   | -1.40 | 1.00E-06 | 1484 |
| Klf15         | Kruppel-like factor 15                                             | 1448181_at   | -1.40 | 0.0487   | 1485 |
| Napa          | N-ethylmaleimide sensitive fusion protein attachment protein alpha | 1448243_at   | 1.40  | 0.0025   | 1486 |
| Foxp2         | forkhead box P2                                                    | 1438232_at   | 1.40  | 0.0038   | 1487 |
| Rnf182        | ring finger protein 182                                            | 1440086_at   | -1.40 | 0.0202   | 1488 |
| Lgi1          | leucine-rich repeat LGI family, member 1                           | 1435851_at   | -1.40 | 3.40E-05 | 1489 |
| Usp18         | ubiquitin specific peptidase 18                                    | 1418191_at   | 1.40  | 0.0474   | 1490 |
| 1435136_at    |                                                                    | 1435136_at   | 1.40  | 0.0005   | 1491 |
| Cdh8          | cadherin 8                                                         | 1455365_at   | -1.40 | 0.0090   | 1492 |
| Atp13a5       | ATPase type 13A5                                                   | 1436411_at   | -1.40 | 0.0204   | 1493 |
| Stat6         | signal transducer and activator of transcription 6                 | 1426353_at   | 1.40  | 0.0129   | 1494 |
| Csf1          | colony stimulating factor 1 (macrophage)                           | 1460220_a_at | -1.40 | 0.0068   | 1495 |
| Cdc40         | cell division cycle 40 homolog (yeast)                             | 1453342_at   | -1.40 | 6.10E-07 | 1496 |
| Ppp1r3g       | protein phosphatase 1, regulatory (inhibitor) subunit 3G           | 1428923_at   | -1.40 | 0.0390   | 1497 |
| Nlk           | nemo like kinase                                                   | 1445427_at   | 1.40  | 0.0470   | 1498 |
| Adra1d        | adrenergic receptor, alpha 1d                                      | 1445424_at   | -1.40 | 0.0036   | 1499 |
| BB396283      |                                                                    | 1446524_at   | -1.40 | 0.0343   | 1500 |
| Tmcc2         | transmembrane and coiled-coil domains 2                            | 1452666_a_at | -1.40 | 0.0005   | 1501 |
| Nr3c2         | nuclear receptor subfamily 3, group C, member 2                    | 1440306_at   | -1.40 | 0.0013   | 1502 |
| A130001G05Rik | RIKEN cDNA A130001G05 gene                                         | 1441068_at   | -1.40 | 0.0380   | 1503 |
| Klf12         | Kruppel-like factor 12                                             | 1439847_s_at | -1.40 | 0.0485   | 1504 |
| Dnajc1        | DnaJ (Hsp40) homolog, subfamily C, member 1                        | 1447649_x_at | 1.40  | 0.0046   | 1505 |
| Nelf          | nasal embryonic LHRH factor                                        | 1449474_a_at | -1.40 | 0.0007   | 1506 |
| 1447452_at    |                                                                    | 1447452_at   | 1.40  | 0.0076   | 1507 |
| Igsf8         | immunoglobulin superfamily, member 8                               | 1460675_at   | -1.40 | 0.0027   | 1508 |
| Tspo          | translocator protein                                               | 1456251_x_at | 1.40  | 0.0148   | 1509 |
| Sphkap        | SPHK1 interactor, AKAP domain containing                           | 1454926_at   | -1.40 | 1.00E-05 | 1510 |



|               |                                                                    |              |       |          |      |
|---------------|--------------------------------------------------------------------|--------------|-------|----------|------|
| Sdccag8       | serologically defined colon cancer antigen 8                       | 1443222_at   | -1.40 | 0.0336   | 1511 |
| Slc29a4       | solute carrier family 29 (nucleoside transporters), member 4       | 1441902_x_at | -1.40 | 0.0221   | 1512 |
| 1440468_at    |                                                                    | 1440468_at   | -1.40 | 0.0381   | 1513 |
| Apcdd1        | adenomatosis polyposis coli down-regulated 1                       | 1418383_at   | -1.40 | 0.0166   | 1514 |
| Pcp4          | Purkinje cell protein 4                                            | 1460214_at   | -1.40 | 2.00E-08 | 1515 |
| Gatsl2        | GATS protein-like 2                                                | 1451589_at   | -1.40 | 0.0139   | 1516 |
| 1443281_at    |                                                                    | 1443281_at   | -1.40 | 0.0052   | 1517 |
| 9130208E07Rik | RIKEN cDNA 9130208E07 gene                                         | 1427425_at   | 1.40  | 0.0052   | 1518 |
| 1442616_at    |                                                                    | 1442616_at   | 1.40  | 0.0161   | 1519 |
| Fam188a       | family with sequence similarity 188, member A                      | 1418963_at   | -1.40 | 1.10E-05 | 1520 |
| Cacnb2        | calcium channel, voltage-dependent, beta 2 subunit                 | 1446632_at   | -1.40 | 0.0204   | 1521 |
| 1440210_at    |                                                                    | 1440210_at   | 1.40  | 0.0014   | 1522 |
| 1438643_at    |                                                                    | 1438643_at   | 1.40  | 0.0175   | 1523 |
| 1436672_at    |                                                                    | 1436672_at   | -1.40 | 0.0005   | 1524 |
| Lrp4          | low density lipoprotein receptor-related protein 4                 | 1426288_at   | -1.40 | 0.0023   | 1525 |
| 2310051F07Rik | RIKEN cDNA 2310051F07 gene                                         | 1455389_s_at | 1.39  | 0.0167   | 1526 |
| Ophn1         | oligophrenin 1                                                     | 1419108_at   | 1.39  | 7.70E-05 | 1527 |
| 1422665_a_at  |                                                                    | 1422665_a_at | 1.39  | 0.0007   | 1528 |
| Trp53inp2     | transformation related protein 53 inducible nuclear protein 2      | 1452646_at   | 1.39  | 0.0458   | 1529 |
| Rilpl1        | Rab interacting lysosomal protein-like 1                           | 1450449_a_at | 1.39  | 0.0158   | 1530 |
| 6530418L21Rik | RIKEN cDNA 6530418L21 gene                                         | 1459051_at   | 1.39  | 0.0128   | 1531 |
| Pknox1        | Pbx/knotted 1 homeobox                                             | 1437470_at   | 1.39  | 0.0122   | 1532 |
| Sema5a        | sema domain, seven thrombospondin repeats (type 1 and type 1-like) | 1422167_at   | -1.39 | 0.0052   | 1533 |
| Spag6         | sperm associated antigen 6                                         | 1417528_at   | -1.39 | 0.0038   | 1534 |
| Diras2        | DIRAS family, GTP-binding RAS-like 2                               | 1445473_at   | 1.39  | 0.0005   | 1535 |
| Hic2          | hypermethylated in cancer 2                                        | 1454944_at   | 1.39  | 0.0031   | 1536 |
| Rbm46         | RNA binding motif protein 46                                       | 1443437_at   | -1.39 | 0.0006   | 1537 |

|               |                                                                  |              |       |          |      |
|---------------|------------------------------------------------------------------|--------------|-------|----------|------|
| Dio2          | deiodinase, iodothyronine, type II                               | 1418937_at   | -1.39 | 0.0017   | 1538 |
| Mm.117965     |                                                                  | 1444923_at   | 1.39  | 0.0350   | 1539 |
| 1435699_at    |                                                                  | 1435699_at   | -1.39 | 0.0145   | 1540 |
| 1460593_at    |                                                                  | 1460593_at   | 1.39  | 0.0058   | 1541 |
| Vat1          | vesicle amine transport protein 1 homolog (T californica)        | 1438165_x_at | 1.39  | 0.0397   | 1542 |
| D630045J12Rik | RIKEN cDNA D630045J12 gene                                       | 1455419_at   | 1.39  | 0.0007   | 1543 |
| Mm.467571     |                                                                  | 1456584_x_at | -1.39 | 0.0139   | 1544 |
| 1436796_at    |                                                                  | 1436796_at   | -1.39 | 0.0009   | 1545 |
| Fabp7         | fatty acid binding protein 7, brain                              | 1450779_at   | -1.39 | 0.0454   | 1546 |
| Nfib          | nuclear factor I/B                                               | 1438072_at   | -1.39 | 0.0281   | 1547 |
| Lgals8        | lectin, galactose binding, soluble 8                             | 1422661_at   | 1.39  | 0.0141   | 1548 |
| Acaa2         | acetyl-Coenzyme A acyltransferase 2 (mitochondrial 3-oxoacyl-CoA | 1455061_a_at | -1.39 | 0.0148   | 1549 |
| 4930434J08Rik | RIKEN cDNA 4930434J08 gene                                       | 1430557_at   | 1.39  | 0.0088   | 1550 |
| Gmeb2         | glucocorticoid modulatory element binding protein 2              | 1454818_at   | 1.39  | 0.0194   | 1551 |
| Ccl27a        | chemokine (C-C motif) ligand 27A                                 | 1419188_s_at | -1.39 | 4.10E-05 | 1552 |
| Clec18a       | C-type lectin domain family 18, member A                         | 1436474_at   | 1.39  | 0.0082   | 1553 |
| 1457374_at    |                                                                  | 1457374_at   | -1.39 | 0.0148   | 1554 |
| Pcsk2         | proprotein convertase subtilisin/kexin type 2                    | 1447992_s_at | 1.39  | 0.0354   | 1555 |
| Ltk           | leukocyte tyrosine kinase                                        | 1460300_a_at | -1.39 | 0.0279   | 1556 |
| Rogdi         | rogdi homolog (Drosophila)                                       | 1451421_a_at | -1.39 | 0.0001   | 1557 |
| Rian          | RNA imprinted and accumulated in nucleus                         | 1440001_at   | 1.39  | 0.0325   | 1558 |
| Rlbp1l2       | retinaldehyde binding protein 1-like 2                           | 1445029_at   | -1.39 | 0.0307   | 1559 |
| 6430571L13Rik | RIKEN cDNA 6430571L13 gene                                       | 1439669_at   | 1.39  | 0.0230   | 1560 |
| Spnb2         | spectrin beta 2                                                  | 1451830_a_at | -1.39 | 0.0016   | 1561 |
| Ier5          | immediate early response 5                                       | 1417613_at   | 1.39  | 0.0187   | 1562 |
| Tbr1          | T-box brain gene 1                                               | 1416711_at   | -1.39 | 0.0173   | 1563 |
| Cryz          | crystallin, zeta                                                 | 1451848_a_at | -1.39 | 0.0005   | 1564 |

|               |                                                              |              |       |          |      |
|---------------|--------------------------------------------------------------|--------------|-------|----------|------|
| 1444466_at    |                                                              | 1444466_at   | -1.39 | 0.0002   | 1565 |
| Kras          | v-Ki-ras2 Kirsten rat sarcoma viral oncogene homolog         | 1451979_at   | 1.39  | 0.0119   | 1566 |
| Nacc2         | nucleus accumbens associated 2, BEN and BTB (POZ) domain con | 1417153_at   | 1.39  | 0.0038   | 1567 |
| Slitrk5       | SLIT and NTRK-like family, member 5                          | 1429718_at   | -1.39 | 0.0010   | 1568 |
| 2810025M15Rik | RIKEN cDNA 2810025M15 gene                                   | 1428452_at   | -1.39 | 0.0226   | 1569 |
| 6720469N11Rik | RIKEN cDNA 6720469N11 gene                                   | 1434797_at   | 1.38  | 0.0002   | 1570 |
| Sept3         | septin 3                                                     | 1417414_at   | -1.38 | 5.70E-05 | 1571 |
| Dhtkd1        | dehydrogenase E1 and transketolase domain containing 1       | 1457027_at   | -1.38 | 0.0313   | 1572 |
| Fam134a       | family with sequence similarity 134, member A                | 1452164_at   | 1.38  | 0.0120   | 1573 |
| Parva         | parvin, alpha                                                | 1416818_at   | 1.38  | 0.0008   | 1574 |
| BG072149      |                                                              | 1446947_at   | 1.38  | 0.0073   | 1575 |
| Mm.80674      |                                                              | 1443306_at   | 1.38  | 0.0042   | 1576 |
| Col12a1       | collagen, type XII, alpha 1                                  | 1434411_at   | 1.38  | 0.0214   | 1577 |
| Shcbp1        | Shc SH2-domain binding protein 1                             | 1416299_at   | 1.38  | 9.90E-05 | 1578 |
| Haus6         | HAUS augmin-like complex, subunit 6                          | 1455488_at   | 1.38  | 0.0158   | 1579 |
| Hspa2         | heat shock protein 2                                         | 1417101_at   | -1.38 | 0.0350   | 1580 |
| Txnrd3        | thioredoxin reductase 3                                      | 1423868_at   | 1.38  | 0.0365   | 1581 |
| Mm.207732     |                                                              | 1458900_at   | -1.38 | 0.0369   | 1582 |
| Rcn1          | reticulocalbin 1                                             | 1417090_at   | -1.38 | 0.0083   | 1583 |
| Eif2c2        | eukaryotic translation initiation factor 2C, 2               | 1426366_at   | 1.38  | 0.0094   | 1584 |
| Pcsk2         | proprotein convertase subtilisin/kexin type 2                | 1428305_at   | 1.38  | 0.0407   | 1585 |
| Hist3h2a      | histone cluster 3, H2a                                       | 1435865_at   | -1.38 | 3.30E-05 | 1586 |
| Fam176b       | family with sequence similarity 176, member B                | 1454933_at   | 1.38  | 0.0172   | 1587 |
| Ccdc136       | coiled-coil domain containing 136                            | 1424699_at   | -1.38 | 0.0010   | 1588 |
| Mm.101960     |                                                              | 1445010_at   | -1.38 | 0.0033   | 1589 |
| Xbp1          | X-box binding protein 1                                      | 1420886_a_at | 1.38  | 0.0053   | 1590 |
| Nhsl1         | NHS-like 1                                                   | 1426934_at   | -1.38 | 0.0130   | 1591 |

|               |                                                                       |              |       |          |      |
|---------------|-----------------------------------------------------------------------|--------------|-------|----------|------|
| Dera          | 2-deoxyribose-5-phosphate aldolase homolog ( <i>C. elegans</i> )      | 1424047_at   | 1.38  | 0.0136   | 1592 |
| Napa          | N-ethylmaleimide sensitive fusion protein attachment protein alpha    | 1416192_at   | 1.38  | 0.0320   | 1593 |
| 1438399_at    |                                                                       | 1438399_at   | -1.38 | 3.40E-07 | 1594 |
| Sept6         | septin 6                                                              | 1420877_at   | 1.38  | 0.0019   | 1595 |
| Moxd1         | monooxygenase, DBH-like 1                                             | 1422643_at   | -1.38 | 0.0078   | 1596 |
| Cxx1c         | CAAX box 1 homolog C (human)                                          | 1450080_at   | 1.38  | 0.0007   | 1597 |
| 2900064K03Rik | RIKEN cDNA 2900064K03 gene                                            | 1433032_at   | -1.38 | 0.0128   | 1598 |
| Poli          | polymerase (DNA directed), iota                                       | 1449098_a_at | -1.38 | 0.0023   | 1599 |
| Pde4dip       | phosphodiesterase 4D interacting protein (myomegalin)                 | 1460426_at   | 1.38  | 0.0246   | 1600 |
| B4galt4       | UDP-Gal:betaGlcNAc beta 1,4-galactosyltransferase, polypeptide 4      | 1425934_a_at | -1.38 | 0.0061   | 1601 |
| Cdh22         | cadherin 22                                                           | 1424767_at   | 1.38  | 0.0265   | 1602 |
| Vav3          | vav 3 oncogene                                                        | 1417122_at   | -1.38 | 0.0042   | 1603 |
| Stab1         | stabilin 1                                                            | 1450199_a_at | 1.38  | 0.0027   | 1604 |
| Ncrna00085    | non-protein coding RNA 85                                             | 1453713_s_at | 1.38  | 0.0021   | 1605 |
| Ccl27a        | chemokine (C-C motif) ligand 27A                                      | 1434962_x_at | -1.38 | 9.60E-06 | 1606 |
| D17H6S56E-5   | DNA segment, Chr 17, human D6S56E 5                                   | 1417822_at   | 1.38  | 0.0082   | 1607 |
| 5730455O13Rik | RIKEN cDNA 5730455O13 gene                                            | 1435810_at   | -1.38 | 0.0085   | 1608 |
| Aldh1a3       | aldehyde dehydrogenase family 1, subfamily A3                         | 1427395_a_at | 1.38  | 0.0285   | 1609 |
| BG067696      |                                                                       | 1446601_at   | -1.38 | 0.0044   | 1610 |
| Zmiz1         | zinc finger, MIZ-type containing 1                                    | 1459305_at   | 1.38  | 0.0060   | 1611 |
| Dll3          | delta-like 3 ( <i>Drosophila</i> )                                    | 1449236_at   | -1.38 | 0.0002   | 1612 |
| Nfia          | nuclear factor I/A                                                    | 1441547_at   | -1.38 | 0.0047   | 1613 |
| Tmpo          | thymopoietin                                                          | 1452036_a_at | 1.38  | 0.0198   | 1614 |
| Serp1b1a      | serine (or cysteine) peptidase inhibitor, clade B, member 1a          | 1416318_at   | -1.38 | 0.0311   | 1615 |
| Slc37a1       | solute carrier family 37 (glycerol-3-phosphate transporter), member 1 | 1426601_at   | 1.38  | 0.0128   | 1616 |
| Mm.380503     |                                                                       | 1436459_at   | 1.38  | 0.0055   | 1617 |
| Dsel          | dermatan sulfate epimerase-like                                       | 1438407_at   | 1.38  | 0.0116   | 1618 |

|               |                                                                    |              |       |        |      |
|---------------|--------------------------------------------------------------------|--------------|-------|--------|------|
| Prkra         | protein kinase, interferon inducible double stranded RNA dependen  | 1448923_at   | -1.38 | 0.0065 | 1619 |
| Asb2          | ankyrin repeat and SOCS box-containing 2                           | 1428444_at   | 1.38  | 0.0067 | 1620 |
| Zfx3          | zinc finger homeobox 3                                             | 1420649_at   | 1.38  | 0.0005 | 1621 |
| D16Ert472e    | DNA segment, Chr 16, ERATO Doi 472, expressed                      | 1424724_a_at | -1.38 | 0.0436 | 1622 |
| Smoc2         | SPARC related modular calcium binding 2                            | 1415935_at   | -1.38 | 0.0127 | 1623 |
| Mm.91327      |                                                                    | 1436110_at   | -1.38 | 0.0146 | 1624 |
| Bhlhe22       | basic helix-loop-helix family, member e22                          | 1418271_at   | -1.38 | 0.0029 | 1625 |
| Fgfbp3        | fibroblast growth factor binding protein 3                         | 1453006_at   | -1.38 | 0.0266 | 1626 |
| 1110006E14Rik | RIKEN cDNA 1110006E14 gene                                         | 1431094_at   | 1.38  | 0.0067 | 1627 |
| Vasn          | vasorin                                                            | 1455812_x_at | 1.37  | 0.0247 | 1628 |
| 1458932_at    |                                                                    | 1458932_at   | -1.37 | 0.0011 | 1629 |
| Ogt           | O-linked N-acetylglucosamine (GlcNAc) transferase (UDP-N-acetyl    | 1425517_s_at | 1.37  | 0.0023 | 1630 |
| Afap111       | actin filament associated protein 1-like 1                         | 1454727_at   | 1.37  | 0.0033 | 1631 |
| Olfm3         | olfactomedin 3                                                     | 1425898_x_at | 1.37  | 0.0026 | 1632 |
| Klhl13        | kelch-like 13 (Drosophila)                                         | 1448269_a_at | -1.37 | 0.0001 | 1633 |
| Dock11        | dedicator of cytokinesis 11                                        | 1429028_at   | -1.37 | 0.0211 | 1634 |
| Tmpo          | thymopoietin                                                       | 1426349_s_at | 1.37  | 0.0001 | 1635 |
| Mm.351378     |                                                                    | 1438885_at   | 1.37  | 0.0083 | 1636 |
| 1453372_at    |                                                                    | 1453372_at   | 1.37  | 0.0064 | 1637 |
| C230094A16Rik | RIKEN cDNA C230094A16 gene                                         | 1425825_at   | -1.37 | 0.0026 | 1638 |
| Zfyve28       | zinc finger, FYVE domain containing 28                             | 1434504_at   | -1.37 | 0.0007 | 1639 |
| Bahd1         | bromo adjacent homology domain containing 1                        | 1433703_s_at | 1.37  | 0.0024 | 1640 |
| Plcz1         | phospholipase C, zeta 1                                            | 1422658_at   | -1.37 | 0.0012 | 1641 |
| Cited2        | Cbp/p300-interacting transactivator, with Glu/Asp-rich carboxy-ter | 1452207_at   | -1.37 | 0.0016 | 1642 |
| Tmem97        | transmembrane protein 97                                           | 1416376_at   | 1.37  | 0.0020 | 1643 |
| Sez6l2        | seizure related 6 homolog like 2                                   | 1434641_x_at | -1.37 | 0.0014 | 1644 |
| Peli1         | pellino 1                                                          | 1444017_at   | -1.37 | 0.0350 | 1645 |

|               |                                                                        |              |       |          |      |
|---------------|------------------------------------------------------------------------|--------------|-------|----------|------|
| Fxn           | frataxin                                                               | 1427282_a_at | -1.37 | 0.0019   | 1646 |
| 1700025G04Rik | RIKEN cDNA 1700025G04 gene                                             | 1455732_at   | -1.37 | 0.0013   | 1647 |
| Mm.163591     |                                                                        | 1457137_at   | 1.37  | 0.0419   | 1648 |
| Man1c1        | mannosidase, alpha, class 1C, member 1                                 | 1436193_at   | -1.37 | 0.0002   | 1649 |
| Dgat2         | diacylglycerol O-acyltransferase 2                                     | 1422678_at   | -1.37 | 0.0235   | 1650 |
| Trdn          | triadin                                                                | 1426142_a_at | -1.37 | 0.0018   | 1651 |
| Mm.413301     |                                                                        | 1440551_at   | 1.37  | 0.0180   | 1652 |
| Ramp1         | receptor (calcitonin) activity modifying protein 1                     | 1431413_at   | -1.37 | 0.0097   | 1653 |
| Myh11         | myosin, heavy polypeptide 11, smooth muscle                            | 1448962_at   | 1.37  | 0.0082   | 1654 |
| Slc25a24      | solute carrier family 25 (mitochondrial carrier, phosphate carrier), n | 1452717_at   | -1.37 | 0.0141   | 1655 |
| Oprm1         | opioid receptor, mu 1                                                  | 1451709_at   | -1.37 | 0.0044   | 1656 |
|               | 228712                                                                 | 1446967_at   | -1.37 | 0.0014   | 1657 |
| AW553412      |                                                                        | 1447013_at   | -1.37 | 0.0075   | 1658 |
| 1440429_at    |                                                                        | 1440429_at   | -1.37 | 0.0443   | 1659 |
| Klhdc8b       | kelch domain containing 8B                                             | 1428221_at   | 1.37  | 0.0215   | 1660 |
| Qpct          | glutaminyl-peptide cyclotransferase (glutaminyl cyclase)               | 1426622_a_at | 1.37  | 0.0079   | 1661 |
| Efhd1         | EF hand domain containing 1                                            | 1448507_at   | -1.37 | 0.0157   | 1662 |
| 1437480_at    |                                                                        | 1437480_at   | -1.37 | 0.0053   | 1663 |
| 1459104_at    |                                                                        | 1459104_at   | 1.37  | 0.0202   | 1664 |
| Foxred2       | FAD-dependent oxidoreductase domain containing 2                       | 1434414_at   | 1.37  | 0.0088   | 1665 |
| Ngef          | neuronal guanine nucleotide exchange factor                            | 1448978_at   | 1.37  | 0.0105   | 1666 |
| AI836003      | expressed sequence AI836003                                            | 1436099_at   | 1.37  | 0.0005   | 1667 |
| 1419652_s_at  |                                                                        | 1419652_s_at | -1.37 | 0.0011   | 1668 |
| Pak6          | p21 protein (Cdc42/Rac)-activated kinase 6                             | 1445475_at   | -1.37 | 5.40E-06 | 1669 |
| Ehd2          | EH-domain containing 2                                                 | 1459823_at   | 1.37  | 0.0177   | 1670 |
| Gcnt2         | glucosaminyl (N-acetyl) transferase 2, I-branching enzyme              | 1425503_at   | -1.37 | 0.0097   | 1671 |
| Mm.138000     |                                                                        | 1459544_at   | -1.37 | 0.0031   | 1672 |

|               |                                                                         |              |       |          |      |
|---------------|-------------------------------------------------------------------------|--------------|-------|----------|------|
| 1454984_at    |                                                                         | 1454984_at   | -1.37 | 0.0020   | 1673 |
| Cit           | citron                                                                  | 1426028_a_at | 1.37  | 0.0488   | 1674 |
| 9230114K14Rik | RIKEN cDNA 9230114K14 gene                                              | 1456643_at   | -1.37 | 0.0114   | 1675 |
| Camkk1        | calcium/calmodulin-dependent protein kinase kinase 1, alpha             | 1418954_at   | 1.37  | 0.0038   | 1676 |
| Odz4          | odd Oz/ten-m homolog 4 (Drosophila)                                     | 1455993_at   | 1.37  | 0.0040   | 1677 |
| Top1mt        | DNA topoisomerase 1, mitochondrial                                      | 1460370_at   | -1.37 | 0.0007   | 1678 |
| Col11a1       | collagen, type XI, alpha 1                                              | 1418599_at   | 1.37  | 0.0441   | 1679 |
| Emid1         | EMI domain containing 1                                                 | 1449581_at   | 1.37  | 0.0084   | 1680 |
| Slc25a29      | solute carrier family 25 (mitochondrial carrier, palmitoylcarnitine tra | 1438188_x_at | -1.37 | 0.0126   | 1681 |
| Aldh1b1       | aldehyde dehydrogenase 1 family, member B1                              | 1451260_at   | 1.37  | 0.0209   | 1682 |
| Ndfip2        | Nedd4 family interacting protein 2                                      | 1452066_a_at | 1.37  | 0.0302   | 1683 |
| Pgm5          | phosphoglucomutase 5                                                    | 1437871_at   | -1.37 | 0.0007   | 1684 |
| Cd163l1       | CD163 molecule-like 1                                                   | 1440808_x_at | -1.37 | 0.0146   | 1685 |
| Bcl10         | B-cell leukemia/lymphoma 10                                             | 1418972_at   | 1.37  | 0.0497   | 1686 |
| 5033414K04Rik | RIKEN cDNA 5033414K04 gene                                              | 1436999_at   | 1.37  | 0.0030   | 1687 |
| Hkdc1         | hexokinase domain containing 1                                          | 1425900_at   | 1.37  | 0.0006   | 1688 |
| Ttl1          | tubulin tyrosine ligase-like 1                                          | 1436833_x_at | -1.37 | 0.0091   | 1689 |
| Lin54         | lin-54 homolog (C. elegans)                                             | 1435181_at   | 1.37  | 0.0261   | 1690 |
| Dazl          | deleted in azoospermia-like                                             | 1419542_at   | -1.37 | 0.0065   | 1691 |
| 1500009C09Rik | RIKEN cDNA 1500009C09 gene                                              | 1452827_at   | -1.37 | 0.0209   | 1692 |
| Tmem164       | transmembrane protein 164                                               | 1454741_s_at | 1.37  | 0.0029   | 1693 |
| Crtac1        | cartilage acidic protein 1                                              | 1459858_x_at | 1.37  | 6.20E-05 | 1694 |
| Lhfp12        | lipoma HMGIC fusion partner-like 2                                      | 1454847_at   | -1.37 | 0.0204   | 1695 |
| 1441974_at    |                                                                         | 1441974_at   | -1.37 | 0.0245   | 1696 |
| Gm12824       | predicted gene 12824                                                    | 1443939_at   | -1.37 | 4.80E-05 | 1697 |
| Fhad1         | forkhead-associated (FHA) phosphopeptide binding domain 1               | 1439190_at   | 1.37  | 0.0159   | 1698 |
| Tmem109       | transmembrane protein 109                                               | 1437008_x_at | -1.37 | 0.0180   | 1699 |

|              |                                                                      |              |       |        |      |
|--------------|----------------------------------------------------------------------|--------------|-------|--------|------|
| 1435914_at   |                                                                      | 1435914_at   | 1.37  | 0.0005 | 1700 |
| Tmem47       | transmembrane protein 47                                             | 1449885_at   | 1.37  | 0.0294 | 1701 |
| LOC100042207 | hypothetical protein LOC100042207                                    | 1460500_at   | -1.37 | 0.0067 | 1702 |
| Prkcc        | protein kinase C, gamma                                              | 1455758_at   | 1.37  | 0.0050 | 1703 |
| Amdhd2       | amidohydrolase domain containing 2                                   | 1434855_at   | -1.37 | 0.0086 | 1704 |
| Rftn1        | raftlin lipid raft linker 1                                          | 1428696_at   | -1.37 | 0.0021 | 1705 |
| Olfm3        | olfactomedin 3                                                       | 1452090_a_at | 1.36  | 0.0023 | 1706 |
| 1424714_at   |                                                                      | 1424714_at   | 1.36  | 0.0035 | 1707 |
| Foxq1        | forkhead box Q1                                                      | 1422735_at   | -1.36 | 0.0014 | 1708 |
| Pvt1         | plasmacytoma variant translocation 1                                 | 1427140_at   | -1.36 | 0.0085 | 1709 |
| Bckdhb       | branched chain ketoacid dehydrogenase E1, beta polypeptide           | 1427153_at   | -1.36 | 0.0024 | 1710 |
| Parvb        | parvin, beta                                                         | 1438672_at   | -1.36 | 0.0044 | 1711 |
| Cdh11        | cadherin 11                                                          | 1450757_at   | -1.36 | 0.0005 | 1712 |
| Bcl10        | B-cell leukemia/lymphoma 10                                          | 1418970_a_at | 1.36  | 0.0246 | 1713 |
| 1457366_at   |                                                                      | 1457366_at   | -1.36 | 0.0055 | 1714 |
| Wnt4         | wingless-related MMTV integration site 4                             | 1450782_at   | -1.36 | 0.0018 | 1715 |
| Ccl8         | chemokine (C-C motif) ligand 8                                       | 1419684_at   | 1.36  | 0.0012 | 1716 |
| Dbt          | dihydrolipoamide branched chain transacylase E2                      | 1440016_at   | -1.36 | 0.0471 | 1717 |
| D3Bwg0562e   | DNA segment, Chr 3, Brigham & Women's Genetics 0562 expressed        | 1427247_at   | -1.36 | 0.0001 | 1718 |
| Abhd2        | abhydrolase domain containing 2                                      | 1435653_at   | 1.36  | 0.0410 | 1719 |
| Zfx3         | zinc finger homeobox 3                                               | 1420650_at   | 1.36  | 0.0245 | 1720 |
| Cth          | cystathionase (cystathionine gamma-lyase)                            | 1426243_at   | -1.36 | 0.0003 | 1721 |
| Nptx1        | neuronal pentraxin 1                                                 | 1422130_at   | 1.36  | 0.0029 | 1722 |
| Galnt3       | UDP-N-acetyl-alpha-D-galactosamine:polypeptide N-acetyltransferase 3 | 1427749_at   | -1.36 | 0.0101 | 1723 |
| 1439204_at   |                                                                      | 1439204_at   | -1.36 | 0.0012 | 1724 |
| Fbn2         | fibrillin 2                                                          | 1422831_at   | -1.36 | 0.0031 | 1725 |
| Hist2h2be    | histone cluster 2, H2be                                              | 1455095_at   | -1.36 | 0.0278 | 1726 |



|            |                                                                 |              |       |          |      |
|------------|-----------------------------------------------------------------|--------------|-------|----------|------|
| Tmpo       | thymopoietin                                                    | 1426020_at   | 1.36  | 0.0050   | 1727 |
| Pbx2       | pre B-cell leukemia transcription factor 2                      | 1418894_s_at | -1.36 | 0.0152   | 1728 |
| B4galt1    | UDP-Gal:betaGlcNAc beta 1,4- galactosyltransferase, polypeptide | 1418014_a_at | 1.36  | 0.0057   | 1729 |
| E2f3       | E2F transcription factor 3                                      | 1427462_at   | 1.36  | 0.0078   | 1730 |
| Ptpm       | protein tyrosine phosphatase, receptor type, M                  | 1422541_at   | 1.36  | 0.0405   | 1731 |
| Mccc2      | methylcrotonoyl-Coenzyme A carboxylase 2 (beta)                 | 1428021_at   | -1.36 | 0.0031   | 1732 |
| Kcnd2      | potassium voltage-gated channel, Shal-related family, member 2  | 1422834_at   | -1.36 | 0.0137   | 1733 |
| AV313111   |                                                                 | 1459868_x_at | -1.36 | 0.0002   | 1734 |
| Kcnn2      | potassium intermediate/small conductance calcium-activated char | 1445676_at   | 1.36  | 0.0005   | 1735 |
| Bok        | BCL2-related ovarian killer protein                             | 1417040_a_at | 1.36  | 0.0172   | 1736 |
| Thrb       | thyroid hormone receptor beta                                   | 1443100_at   | -1.36 | 0.0257   | 1737 |
| Raly1      | RALY RNA binding protein-like                                   | 1454715_at   | -1.36 | 0.0140   | 1738 |
| 1434413_at |                                                                 | 1434413_at   | 1.36  | 0.0002   | 1739 |
| 1431114_at |                                                                 | 1431114_at   | -1.36 | 0.0019   | 1740 |
| Gm1476     | gene model 1476, (NCBI)                                         | 1439992_at   | -1.36 | 0.0105   | 1741 |
| Rian       | RNA imprinted and accumulated in nucleus                        | 1427580_a_at | 1.36  | 0.0036   | 1742 |
| Gm4980     | predicted gene 4980                                             | 1455739_at   | -1.36 | 0.0011   | 1743 |
| Agfg1      | ArfGAP with FG repeats 1                                        | 1442489_at   | 1.36  | 0.0071   | 1744 |
| 1445391_at |                                                                 | 1445391_at   | -1.36 | 0.0375   | 1745 |
| Rimklb     | ribosomal modification protein rimK-like family member B        | 1429982_at   | -1.36 | 9.50E-06 | 1746 |
| Shh        | sonic hedgehog                                                  | 1436869_at   | 1.36  | 0.0498   | 1747 |
| Tbkbp1     | TBK1 binding protein 1                                          | 1435183_at   | -1.36 | 0.0248   | 1748 |
| D5Wsu178e  | DNA segment, Chr 5, Wayne State University 178, expressed       | 1431802_a_at | 1.36  | 0.0173   | 1749 |
| Dlgap4     | discs, large homolog-associated protein 4 (Drosophila)          | 1426465_at   | 1.36  | 0.0020   | 1750 |
| Chia       | chitinase, acidic                                               | 1416456_a_at | -1.36 | 0.0071   | 1751 |
| 1442330_at |                                                                 | 1442330_at   | 1.36  | 0.0206   | 1752 |
| Sgip1      | SH3-domain GRB2-like (endophilin) interacting protein 1         | 1458328_x_at | -1.36 | 0.0061   | 1753 |

|            |                                                                     |              |       |        |      |
|------------|---------------------------------------------------------------------|--------------|-------|--------|------|
| Cobll1     | Cobl-like 1                                                         | 1454795_at   | -1.36 | 0.0005 | 1754 |
| Adcy7      | adenylate cyclase 7                                                 | 1456307_s_at | 1.36  | 0.0015 | 1755 |
| Lmo1       | LIM domain only 1                                                   | 1418478_at   | -1.36 | 0.0097 | 1756 |
| Atp2b2     | ATPase, Ca <sup>++</sup> transporting, plasma membrane 2            | 1420403_at   | 1.36  | 0.0014 | 1757 |
| Socs2      | suppressor of cytokine signaling 2                                  | 1446085_at   | 1.35  | 0.0016 | 1758 |
| Zfp36      | zinc finger protein 36                                              | 1452519_a_at | 1.35  | 0.0361 | 1759 |
| Jarid2     | jumonji, AT rich interactive domain 2                               | 1456661_at   | -1.35 | 0.0180 | 1760 |
| Tmem47     | transmembrane protein 47                                            | 1420514_at   | 1.35  | 0.0072 | 1761 |
| Sfrp4      | secreted frizzled-related protein 4                                 | 1451031_at   | 1.35  | 0.0253 | 1762 |
| Taf5       | TAF5 RNA polymerase II, TATA box binding protein (TBP)-associa      | 1435474_at   | 1.35  | 0.0199 | 1763 |
| Ubtf       | upstream binding transcription factor, RNA polymerase I             | 1460304_a_at | 1.35  | 0.0056 | 1764 |
| Mcee       | methylmalonyl CoA epimerase                                         | 1438477_a_at | -1.35 | 0.0281 | 1765 |
| 1448843_at |                                                                     | 1448843_at   | 1.35  | 0.0087 | 1766 |
| Zfx3       | zinc finger homeobox 3                                              | 1460006_at   | 1.35  | 0.0127 | 1767 |
| Rps6ka3    | ribosomal protein S6 kinase polypeptide 3                           | 1441360_at   | 1.35  | 0.0077 | 1768 |
| Cxx1a      | CAAX box 1 homolog A (human)                                        | 1423816_at   | 1.35  | 0.0028 | 1769 |
| Tradd      | TNFRSF1A-associated via death domain                                | 1452622_a_at | -1.35 | 0.0042 | 1770 |
| Epha4      | Eph receptor A4                                                     | 1439757_s_at | 1.35  | 0.0448 | 1771 |
| Fam126a    | family with sequence similarity 126, member A                       | 1450724_at   | -1.35 | 0.0001 | 1772 |
| Sh3bp4     | SH3-domain binding protein 4                                        | 1416305_at   | -1.35 | 0.0001 | 1773 |
| Ogt        | O-linked N-acetylglucosamine (GlcNAc) transferase (UDP-N-acet       | 1425516_at   | 1.35  | 0.0009 | 1774 |
| Dcakd      | dephospho-CoA kinase domain containing                              | 1460205_at   | -1.35 | 0.0004 | 1775 |
| Pim3       | proviral integration site 3                                         | 1451069_at   | 1.35  | 0.0262 | 1776 |
| Clybl      | citrate lyase beta like                                             | 1421014_a_at | -1.35 | 0.0066 | 1777 |
| Slc6a3     | solute carrier family 6 (neurotransmitter transporter, dopamine), m | 1417415_at   | -1.35 | 0.0006 | 1778 |
| Inpp5f     | inositol polyphosphate-5-phosphatase F                              | 1433542_at   | 1.35  | 0.0288 | 1779 |
| Ttyh1      | tweety homolog 1 (Drosophila)                                       | 1422694_at   | 1.35  | 0.0008 | 1780 |

|            |                                                                     |              |       |          |      |
|------------|---------------------------------------------------------------------|--------------|-------|----------|------|
| Mm.323004  |                                                                     | 1440325_at   | -1.35 | 0.0446   | 1781 |
| D3Bwg0562e | DNA segment, Chr 3, Brigham & Women's Genetics 0562 expressed       | 1434685_at   | -1.35 | 0.0018   | 1782 |
| Serpina1b  | serine (or cysteine) peptidase inhibitor, clade A, member 1B        | 1418282_x_at | 1.35  | 0.0309   | 1783 |
| Porcn      | porcupine homolog (Drosophila)                                      | 1424220_a_at | -1.35 | 1.40E-06 | 1784 |
| 1449839_at |                                                                     | 1449839_at   | -1.35 | 2.70E-05 | 1785 |
| Pex5l      | peroxisomal biogenesis factor 5-like                                | 1451062_a_at | -1.35 | 0.0022   | 1786 |
| Lmo2       | LIM domain only 2                                                   | 1454086_a_at | -1.35 | 0.0002   | 1787 |
| Man1a2     | mannosidase, alpha, class 1A, member 2                              | 1440259_at   | 1.35  | 0.0038   | 1788 |
| Rcan1      | regulator of calcineurin 1                                          | 1416601_a_at | 1.35  | 0.0072   | 1789 |
| Nfib       | nuclear factor I/B                                                  | 1438245_at   | -1.35 | 0.0274   | 1790 |
| Dfna5      | deafness, autosomal dominant 5 (human)                              | 1417903_at   | -1.35 | 0.0080   | 1791 |
| Fam102b    | family with sequence similarity 102, member B                       | 1434828_at   | -1.35 | 3.50E-06 | 1792 |
| Ctsb       | cathepsin B                                                         | 1459497_at   | 1.35  | 0.0288   | 1793 |
| Klk6       | kallikrein related-peptidase 6                                      | 1448982_at   | 1.35  | 0.0090   | 1794 |
| Lrrn4      | leucine rich repeat neuronal 4                                      | 1435648_at   | -1.35 | 0.0146   | 1795 |
| Slc16a2    | solute carrier family 16 (monocarboxylic acid transporters), member | 1418446_at   | -1.35 | 0.0325   | 1796 |
| Ctps2      | cytidine 5'-triphosphate synthase 2                                 | 1448111_at   | 1.35  | 0.0071   | 1797 |
| Armc10     | armadillo repeat containing 10                                      | 1417062_at   | 1.35  | 0.0251   | 1798 |
| Plb1       | phospholipase B1                                                    | 1437893_at   | -1.35 | 0.0246   | 1799 |
| Spnb2      | spectrin beta 2                                                     | 1419255_at   | -1.35 | 0.0261   | 1800 |
| 1457834_at |                                                                     | 1457834_at   | 1.35  | 0.0017   | 1801 |
| Chrdl2     | chordin-like 2                                                      | 1420539_a_at | -1.35 | 0.0079   | 1802 |
| Gpsm1      | G-protein signalling modulator 1 (AGS3-like, C. elegans)            | 1423689_a_at | 1.35  | 0.0010   | 1803 |
| Rep15      | RAB15 effector protein                                              | 1420328_at   | -1.35 | 0.0018   | 1804 |
| Fbxo6      | F-box protein 6                                                     | 1417501_at   | 1.35  | 0.0003   | 1805 |
| Rnf157     | ring finger protein 157                                             | 1434902_at   | 1.35  | 0.0004   | 1806 |
| Hic2       | hypermethylated in cancer 2                                         | 1437571_at   | 1.35  | 0.0004   | 1807 |

|               |                                                                      |              |       |          |      |
|---------------|----------------------------------------------------------------------|--------------|-------|----------|------|
| BB182297      | expressed sequence BB182297                                          | 1436585_at   | -1.35 | 0.0486   | 1808 |
| Nck2          | non-catalytic region of tyrosine kinase adaptor protein 2            | 1416796_at   | -1.35 | 0.0062   | 1809 |
| Slc7a3        | solute carrier family 7 (cationic amino acid transporter, y+ system) | 1417022_at   | -1.35 | 0.0370   | 1810 |
| Mertk         | c-mer proto-oncogene tyrosine kinase                                 | 1422869_at   | -1.35 | 0.0267   | 1811 |
| Klf13         | Kruppel-like factor 13                                               | 1432543_a_at | 1.35  | 0.0145   | 1812 |
| Smg5          | Smg-5 homolog, nonsense mediated mRNA decay factor (C. elegar        | 1434546_at   | 1.35  | 0.0004   | 1813 |
| AV165800      |                                                                      | 1430952_at   | -1.35 | 0.0263   | 1814 |
| Ddt           | D-dopachrome tautomerase                                             | 1417103_at   | -1.35 | 0.0365   | 1815 |
| 2010204K13Rik | RIKEN cDNA 2010204K13 gene                                           | 1421498_a_at | -1.35 | 0.0329   | 1816 |
| Shmt1         | serine hydroxymethyltransferase 1 (soluble)                          | 1425178_s_at | -1.35 | 0.0039   | 1817 |
| Syt12         | synaptotagmin XII                                                    | 1422878_at   | 1.35  | 0.0194   | 1818 |
| 1457451_at    |                                                                      | 1457451_at   | 1.35  | 0.0011   | 1819 |
| Gmds          | GDP-mannose 4, 6-dehydratase                                         | 1442178_at   | -1.35 | 0.0277   | 1820 |
| 1430636_at    |                                                                      | 1430636_at   | -1.35 | 0.0268   | 1821 |
| Rcan1         | regulator of calcineurin 1                                           | 1416600_a_at | 1.35  | 0.0005   | 1822 |
| BC006779      | cDNA sequence BC006779                                               | 1435454_a_at | 1.35  | 0.0135   | 1823 |
| 1456816_at    |                                                                      | 1456816_at   | 1.35  | 0.0060   | 1824 |
| Fjx1          | four jointed box 1 (Drosophila)                                      | 1450728_at   | -1.35 | 0.0110   | 1825 |
| 1457146_at    |                                                                      | 1457146_at   | -1.35 | 0.0039   | 1826 |
| Mal2          | mal, T-cell differentiation protein 2                                | 1427042_at   | -1.35 | 0.0048   | 1827 |
| Fmo1          | flavin containing monooxygenase 1                                    | 1417429_at   | 1.35  | 0.0072   | 1828 |
| AI854703      | expressed sequence AI854703                                          | 1435048_at   | -1.35 | 0.0294   | 1829 |
| Sgsm2         | small G protein signaling modulator 2                                | 1455178_at   | 1.35  | 0.0081   | 1830 |
| Rcan3         | regulator of calcineurin 3                                           | 1434027_at   | -1.35 | 4.70E-05 | 1831 |
| Asap1         | ArfGAP with SH# domain, ankyrin repeat and PH domain1                | 1435059_at   | 1.34  | 0.0008   | 1832 |
| Siae          | sialic acid acetylerase                                              | 1460387_a_at | 1.34  | 0.0492   | 1833 |
| Lhx9          | LIM homeobox protein 9                                               | 1431598_a_at | -1.34 | 0.0087   | 1834 |

|               |                                                                         |              |       |          |      |
|---------------|-------------------------------------------------------------------------|--------------|-------|----------|------|
| Sdad1         | SDA1 domain containing 1                                                | 1452454_at   | 1.34  | 0.0299   | 1835 |
| Ncapg         | non-SMC condensin I complex, subunit G                                  | 1445552_at   | -1.34 | 0.0337   | 1836 |
| 1442325_at    |                                                                         | 1442325_at   | -1.34 | 0.0099   | 1837 |
| Mm.124147     |                                                                         | 1435931_at   | -1.34 | 0.0211   | 1838 |
| Ptpnb         | protein tyrosine phosphatase, receptor type, B                          | 1427486_at   | 1.34  | 0.0255   | 1839 |
| Slc24a3       | solute carrier family 24 (sodium/potassium/calcium exchanger), member 3 | 1424308_at   | -1.34 | 0.0159   | 1840 |
| 1431004_at    |                                                                         | 1431004_at   | 1.34  | 0.0079   | 1841 |
| 4930539E08Rik | RIKEN cDNA 4930539E08 gene                                              | 1437918_at   | 1.34  | 0.0026   | 1842 |
| Cacnb1        | calcium channel, voltage-dependent, beta 1 subunit                      | 1426108_s_at | 1.34  | 0.0133   | 1843 |
| 5730478J17Rik | RIKEN cDNA 5730478J17 gene                                              | 1433050_at   | -1.34 | 0.0288   | 1844 |
| Rasgrf1       | RAS protein-specific guanine nucleotide-releasing factor 1              | 1435614_s_at | -1.34 | 7.80E-08 | 1845 |
| Gm11818       | predicted gene 11818                                                    | 1440215_at   | -1.34 | 0.0092   | 1846 |
| E130014H10Rik | RIKEN cDNA E130014H10 gene                                              | 1443977_at   | -1.34 | 0.0117   | 1847 |
| Tmem109       | transmembrane protein 109                                               | 1456057_x_at | -1.34 | 0.0466   | 1848 |
| Ube2g1        | ubiquitin-conjugating enzyme E2G 1 (UBC7 homolog, C. elegans)           | 1455094_s_at | 1.34  | 0.0341   | 1849 |
| Gabpb1        | GA repeat binding protein, beta 1                                       | 1436232_a_at | 1.34  | 0.0179   | 1850 |
| 1441462_at    |                                                                         | 1441462_at   | -1.34 | 0.0015   | 1851 |
| Krt77         | keratin 77                                                              | 1433923_at   | -1.34 | 0.0334   | 1852 |
| 1455228_at    |                                                                         | 1455228_at   | 1.34  | 0.0005   | 1853 |
| Mccc2         | methylcrotonoyl-Coenzyme A carboxylase 2 (beta)                         | 1432472_a_at | -1.34 | 0.0013   | 1854 |
| 1446441_at    |                                                                         | 1446441_at   | 1.34  | 0.0076   | 1855 |
| Sergef        | secretion regulating guanine nucleotide exchange factor                 | 1442221_at   | 1.34  | 0.0072   | 1856 |
| 1447063_at    |                                                                         | 1447063_at   | -1.34 | 0.0063   | 1857 |
| Magi1         | membrane associated guanylate kinase, WW and PDZ domain containing 1    | 1440871_at   | -1.34 | 0.0005   | 1858 |
| Prkar2b       | protein kinase, cAMP dependent regulatory, type II beta                 | 1430640_a_at | 1.34  | 0.0035   | 1859 |
| Dlgap4        | discs, large homolog-associated protein 4 (Drosophila)                  | 1455548_at   | 1.34  | 0.0006   | 1860 |
| Mrap2         | melanocortin 2 receptor accessory protein 2                             | 1436274_at   | -1.34 | 0.0406   | 1861 |

|            |                                                                |              |       |          |      |
|------------|----------------------------------------------------------------|--------------|-------|----------|------|
| Btbd3      | BTB (POZ) domain containing 3                                  | 1433868_at   | -1.34 | 0.0040   | 1862 |
| 1459398_at |                                                                | 1459398_at   | -1.34 | 0.0166   | 1863 |
| Nab2       | Ngfi-A binding protein 2                                       | 1417930_at   | 1.34  | 0.0003   | 1864 |
| Dpf3       | D4, zinc and double PHD fingers, family 3                      | 1450162_at   | 1.34  | 0.0160   | 1865 |
| Kcnd2      | potassium voltage-gated channel, Shal-related family, member 2 | 1458167_at   | -1.34 | 0.0175   | 1866 |
| Nat13      | N-acetyltransferase 13                                         | 1428409_at   | 1.34  | 0.0005   | 1867 |
| 1439080_at |                                                                | 1439080_at   | 1.34  | 0.0235   | 1868 |
| Adcy2      | adenylate cyclase 2                                            | 1455462_at   | 1.34  | 1.50E-05 | 1869 |
| Vrk1       | vaccinia related kinase 1                                      | 1425006_a_at | -1.34 | 0.0030   | 1870 |
| Rin1       | Ras and Rab interactor 1                                       | 1424507_at   | -1.34 | 0.0016   | 1871 |
| 1433205_at |                                                                | 1433205_at   | 1.34  | 0.0052   | 1872 |
| Pim3       | proviral integration site 3                                    | 1437100_x_at | 1.34  | 0.0078   | 1873 |
| Irs2       | insulin receptor substrate 2                                   | 1443969_at   | -1.34 | 0.0112   | 1874 |
| Cbr2       | carbonyl reductase 2                                           | 1418509_at   | 1.34  | 0.0022   | 1875 |
| Car2       | carbonic anhydrase 2                                           | 1448752_at   | -1.34 | 0.0137   | 1876 |
| 1423585_at |                                                                | 1423585_at   | 1.34  | 0.0135   | 1877 |
| Cdh11      | cadherin 11                                                    | 1446048_at   | -1.34 | 0.0373   | 1878 |
| Ano3       | anoctamin 3                                                    | 1445631_at   | 1.34  | 0.0134   | 1879 |
| Aif1l      | allograft inflammatory factor 1-like                           | 1451287_s_at | -1.34 | 0.0234   | 1880 |
| Rbms1      | RNA binding motif, single stranded interacting protein 1       | 1418703_at   | 1.34  | 0.0472   | 1881 |
| Mkl1       | MKL (megakaryoblastic leukemia)/myocardin-like 1               | 1434900_at   | -1.34 | 1.90E-06 | 1882 |
| 1455521_at |                                                                | 1455521_at   | -1.34 | 0.0449   | 1883 |
| Rab9b      | RAB9B, member RAS oncogene family                              | 1433791_at   | -1.34 | 0.0086   | 1884 |
| Mm.458630  |                                                                | 1436406_at   | -1.34 | 0.0154   | 1885 |
| Grhpr      | glyoxylate reductase/hydroxypyruvate reductase                 | 1417772_at   | -1.34 | 0.0099   | 1886 |
| 1438660_at |                                                                | 1438660_at   | -1.34 | 0.0191   | 1887 |
| 434398     |                                                                | 1447047_at   | 1.34  | 0.0376   | 1888 |

|               |                                                          |              |       |        |      |
|---------------|----------------------------------------------------------|--------------|-------|--------|------|
| Tgm2          | transglutaminase 2, C polypeptide                        | 1417500_a_at | 1.34  | 0.0319 | 1889 |
| 1110029L17Rik | RIKEN cDNA 1110029L17 gene                               | 1455294_at   | 1.34  | 0.0124 | 1890 |
| Rhoq          | ras homolog gene family, member Q                        | 1427918_a_at | 1.34  | 0.0402 | 1891 |
| Rnf144a       | ring finger protein 144A                                 | 1438404_at   | 1.34  | 0.0065 | 1892 |
| LOC552876     | hypothetical LOC552876                                   | 1442041_at   | -1.34 | 0.0084 | 1893 |
| Dbpht2        | DNA binding protein with his-thr domain                  | 1456998_at   | -1.34 | 0.0239 | 1894 |
| Cdh8          | cadherin 8                                               | 1422052_at   | -1.34 | 0.0288 | 1895 |
| 1435260_at    |                                                          | 1435260_at   | -1.34 | 0.0027 | 1896 |
| Spata2        | spermatogenesis associated 2                             | 1434107_at   | -1.34 | 0.0050 | 1897 |
| Polr3g        | polymerase (RNA) III (DNA directed) polypeptide G        | 1449155_at   | 1.34  | 0.0136 | 1898 |
| Nfasc         | neurofascin                                              | 1456068_at   | 1.34  | 0.0004 | 1899 |
| Eya1          | eyes absent 1 homolog (Drosophila)                       | 1457424_at   | -1.34 | 0.0042 | 1900 |
| 1431717_at    |                                                          | 1431717_at   | 1.34  | 0.0332 | 1901 |
| Pcdh9         | protocadherin 9                                          | 1442659_at   | -1.34 | 0.0024 | 1902 |
| Mm.54198      |                                                          | 1458535_at   | 1.34  | 0.0189 | 1903 |
| Uchl1         | ubiquitin carboxy-terminal hydrolase L1                  | 1448260_at   | 1.34  | 0.0237 | 1904 |
| Bai1          | brain-specific angiogenesis inhibitor 1                  | 1455363_at   | 1.33  | 0.0008 | 1905 |
| 1448671_at    |                                                          | 1448671_at   | 1.33  | 0.0028 | 1906 |
| Asb5          | ankyrin repeat and SOCs box-containing 5                 | 1449356_at   | 1.33  | 0.0385 | 1907 |
| Spin2         | spindlin family, member 2                                | 1455297_at   | -1.33 | 0.0432 | 1908 |
| Bach1         | BTB and CNC homology 1                                   | 1440831_at   | 1.33  | 0.0041 | 1909 |
| Akap2         | A kinase (PRKA) anchor protein 2                         | 1455870_at   | -1.33 | 0.0035 | 1910 |
| Mccc2         | methylcrotonoyl-Coenzyme A carboxylase 2 (beta)          | 1454840_at   | -1.33 | 0.0238 | 1911 |
| St5           | suppression of tumorigenicity 5                          | 1428372_at   | -1.33 | 0.0228 | 1912 |
| Mbp           | myelin basic protein                                     | 1425264_s_at | -1.33 | 0.0204 | 1913 |
| Cd151         | CD151 antigen                                            | 1437670_x_at | 1.33  | 0.0373 | 1914 |
| Txndc12       | thioredoxin domain containing 12 (endoplasmic reticulum) | 1415738_at   | 1.33  | 0.0004 | 1915 |

|            |                                                                        |              |       |          |      |
|------------|------------------------------------------------------------------------|--------------|-------|----------|------|
| Miat       | myocardial infarction associated transcript (non-protein coding)       | 1458903_at   | -1.33 | 0.0179   | 1916 |
| C130094E24 | hypothetical protein C130094E24                                        | 1436367_at   | 1.33  | 0.0229   | 1917 |
| D7Wsu130e  | DNA segment, Chr 7, Wayne State University 130, expressed              | 1447462_at   | -1.33 | 8.10E-06 | 1918 |
| 1448028_at |                                                                        | 1448028_at   | -1.33 | 0.0003   | 1919 |
| Slc39a10   | solute carrier family 39 (zinc transporter), member 10                 | 1439041_at   | 1.33  | 0.0133   | 1920 |
| Gucy1b3    | guanylate cyclase 1, soluble, beta 3                                   | 1420871_at   | -1.33 | 2.90E-05 | 1921 |
| Abcb1b     | ATP-binding cassette, sub-family B (MDR/TAP), member 1B                | 1418872_at   | -1.33 | 0.0024   | 1922 |
| Zfp318     | zinc finger protein 318                                                | 1421479_at   | 1.33  | 0.0044   | 1923 |
| Stat5b     | signal transducer and activator of transcription 5B                    | 1422103_a_at | 1.33  | 0.0036   | 1924 |
| Tbc1d15    | TBC1 domain family, member 15                                          | 1416062_at   | 1.33  | 0.0040   | 1925 |
| Tmem181a   | transmembrane protein 181A                                             | 1440862_at   | 1.33  | 0.0005   | 1926 |
| Map2k6     | mitogen-activated protein kinase kinase 6                              | 1459292_at   | -1.33 | 0.0346   | 1927 |
| 1446539_at |                                                                        | 1446539_at   | -1.33 | 0.0038   | 1928 |
| Tmem109    | transmembrane protein 109                                              | 1416032_at   | -1.33 | 0.0240   | 1929 |
| Spag1      | sperm associated antigen 1                                             | 1419588_at   | -1.33 | 0.0163   | 1930 |
| Them4      | thioesterase superfamily member 4                                      | 1427055_at   | -1.33 | 0.0257   | 1931 |
| Pafah1b3   | platelet-activating factor acetylhydrolase, isoform 1b, subunit 3      | 1416410_at   | 1.33  | 0.0039   | 1932 |
| Unc13b     | unc-13 homolog B (C. elegans)                                          | 1417757_at   | 1.33  | 0.0080   | 1933 |
| 1439843_at |                                                                        | 1439843_at   | -1.33 | 0.0155   | 1934 |
| Ptger4     | prostaglandin E receptor 4 (subtype EP4)                               | 1421073_a_at | 1.33  | 0.0448   | 1935 |
| Sult1a1    | sulfotransferase family 1A, phenol-preferring, member 1                | 1427345_a_at | 1.33  | 0.0109   | 1936 |
| 1452238_at |                                                                        | 1452238_at   | 1.33  | 0.0172   | 1937 |
| Mgst1      | microsomal glutathione S-transferase 1                                 | 1415897_a_at | 1.33  | 0.0154   | 1938 |
| 1456885_at |                                                                        | 1456885_at   | -1.33 | 0.0076   | 1939 |
| B830032F12 | hypothetical protein B830032F12                                        | 1435957_at   | 1.33  | 0.0003   | 1940 |
| Slc25a26   | solute carrier family 25 (mitochondrial carrier, phosphate carrier), n | 1441375_at   | 1.33  | 0.0298   | 1941 |
| Klf9       | Kruppel-like factor 9                                                  | 1422264_s_at | 1.33  | 0.0004   | 1942 |



|               |                                                               |              |       |        |      |
|---------------|---------------------------------------------------------------|--------------|-------|--------|------|
| D630023F18Rik | RIKEN cDNA D630023F18 gene                                    | 1439880_at   | -1.33 | 0.0050 | 1943 |
| C78859        | expressed sequence C78859                                     | 1445502_at   | -1.33 | 0.0028 | 1944 |
| Col8a2        | collagen, type VIII, alpha 2                                  | 1434667_at   | 1.33  | 0.0253 | 1945 |
| Pcnx          | pecanex homolog (Drosophila)                                  | 1419049_at   | 1.33  | 0.0030 | 1946 |
| 2610007B07Rik | RIKEN cDNA 2610007B07 gene                                    | 1453542_at   | -1.33 | 0.0393 | 1947 |
| Mm.460817     |                                                               | 1447939_a_at | -1.33 | 0.0031 | 1948 |
| Foxn3         | forkhead box N3                                               | 1438255_at   | -1.33 | 0.0003 | 1949 |
| Dpy19l3       | dpy-19-like 3 (C. elegans)                                    | 1437858_at   | 1.33  | 0.0421 | 1950 |
| Sept6         | septin 6                                                      | 1460286_at   | 1.33  | 0.0019 | 1951 |
| Trp53i13      | transformation related protein 53 inducible protein 13        | 1455315_at   | -1.33 | 0.0014 | 1952 |
| Mm.102129     |                                                               | 1444724_at   | -1.33 | 0.0315 | 1953 |
| Hrk           | harakiri, BCL2 interacting protein (contains only BH3 domain) | 1450366_at   | -1.33 | 0.0052 | 1954 |
| C1qc          | complement component 1, q subcomponent, C chain               | 1449401_at   | 1.33  | 0.0239 | 1955 |
| C77370        | expressed sequence C77370                                     | 1440910_at   | -1.33 | 0.0005 | 1956 |
| Chn2          | chimerin (chimaerin) 2                                        | 1428574_a_at | -1.33 | 0.0417 | 1957 |
| Diap1         | diaphanous homolog 1 (Drosophila)                             | 1454979_at   | -1.33 | 0.0178 | 1958 |
| C1ql3         | C1q-like 3                                                    | 1451620_at   | -1.33 | 0.0029 | 1959 |
| Scn1b         | sodium channel, voltage-gated, type I, beta                   | 1418738_at   | 1.33  | 0.0227 | 1960 |
| Mreg          | melanoregulin                                                 | 1437250_at   | 1.33  | 0.0032 | 1961 |
| 1431896_at    |                                                               | 1431896_at   | -1.33 | 0.0311 | 1962 |
| Syt3          | synaptotagmin III                                             | 1417708_at   | -1.33 | 0.0117 | 1963 |
| 1439607_at    |                                                               | 1439607_at   | 1.33  | 0.0082 | 1964 |
| Samd4         | sterile alpha motif domain containing 4                       | 1429449_at   | 1.33  | 0.0015 | 1965 |
| Mtx3          | metaxin 3                                                     | 1434806_at   | -1.33 | 0.0174 | 1966 |
| Sh3bgrl3      | SH3 domain binding glutamic acid-rich protein-like 3          | 1416528_at   | 1.33  | 0.0001 | 1967 |
| 1452297_at    |                                                               | 1452297_at   | 1.33  | 0.0495 | 1968 |
| Galt          | galactose-1-phosphate uridyl transferase                      | 1450187_a_at | -1.33 | 0.0010 | 1969 |

|               |                                                                          |              |       |          |      |
|---------------|--------------------------------------------------------------------------|--------------|-------|----------|------|
| Dnahc1        | dynein, axonemal, heavy chain 1                                          | 1444208_at   | 1.33  | 0.0097   | 1970 |
| Ppp3r1        | protein phosphatase 3, regulatory subunit B, alpha isoform (calcine      | 1421786_at   | 1.33  | 0.0067   | 1971 |
| Atp11c        | ATPase, class VI, type 11C                                               | 1455083_at   | 1.33  | 0.0004   | 1972 |
| Kcnip4        | Kv channel interacting protein 4                                         | 1450370_a_at | -1.33 | 0.0164   | 1973 |
| Sez6l2        | seizure related 6 homolog like 2                                         | 1423983_at   | -1.33 | 0.0004   | 1974 |
| 1437303_at    |                                                                          | 1437303_at   | 1.33  | 0.0272   | 1975 |
| 1435621_at    |                                                                          | 1435621_at   | -1.33 | 0.0015   | 1976 |
| Atp1b3        | ATPase, Na <sup>+</sup> /K <sup>+</sup> transporting, beta 3 polypeptide | 1423126_at   | 1.33  | 0.0125   | 1977 |
| Zfp286        | zinc finger protein 286                                                  | 1425081_at   | -1.33 | 0.0024   | 1978 |
| Vldlr         | very low density lipoprotein receptor                                    | 1434465_x_at | -1.33 | 0.0103   | 1979 |
| 1455609_at    |                                                                          | 1455609_at   | 1.33  | 0.0359   | 1980 |
| Sh3rf3        | SH3 domain containing ring finger 3                                      | 1456946_at   | -1.33 | 0.0162   | 1981 |
| Jund          | Jun proto-oncogene related gene d                                        | 1449117_at   | 1.33  | 0.0031   | 1982 |
| 1442667_at    |                                                                          | 1442667_at   | -1.33 | 0.0039   | 1983 |
| Prokr2        | prokineticin receptor 2                                                  | 1437695_at   | -1.33 | 0.0293   | 1984 |
| Clip1         | CAP-GLY domain containing linker protein 1                               | 1450351_a_at | -1.33 | 0.0023   | 1985 |
| Mm.375362     |                                                                          | 1440587_at   | -1.33 | 0.0402   | 1986 |
| 1700008O03Rik | RIKEN cDNA 1700008O03 gene                                               | 1454009_at   | -1.32 | 0.0008   | 1987 |
| Dbt           | dihydrolipoamide branched chain transacylase E2                          | 1449118_at   | -1.32 | 0.0089   | 1988 |
| Dnahc9        | dynein, axonemal, heavy chain 9                                          | 1457401_at   | -1.32 | 0.0123   | 1989 |
| Pnma1         | paraneoplastic antigen MA1                                               | 1429224_at   | -1.32 | 0.0191   | 1990 |
| Krt10         | keratin 10                                                               | 1452166_a_at | -1.32 | 0.0166   | 1991 |
| Gnb4          | guanine nucleotide binding protein (G protein), beta 4                   | 1419470_at   | -1.32 | 5.10E-05 | 1992 |
| Ogt           | O-linked N-acetylglucosamine (GlcNAc) transferase (UDP-N-acet            | 1451738_at   | 1.32  | 5.30E-05 | 1993 |
| Sec63         | SEC63-like ( <i>S. cerevisiae</i> )                                      | 1419819_s_at | 1.32  | 0.0186   | 1994 |
| Vamp5         | vesicle-associated membrane protein 5                                    | 1430522_a_at | 1.32  | 0.0242   | 1995 |
| Ldb3          | LIM domain binding 3                                                     | 1433783_at   | -1.32 | 0.0009   | 1996 |

|               |                                                                  |              |       |        |      |
|---------------|------------------------------------------------------------------|--------------|-------|--------|------|
| Osbpl1a       | oxysterol binding protein-like 1A                                | 1416823_a_at | -1.32 | 0.0366 | 1997 |
| Fam181b       | family with sequence similarity 181, member B                    | 1417862_at   | -1.32 | 0.0003 | 1998 |
| Tnnt2         | troponin T2, cardiac                                             | 1424967_x_at | -1.32 | 0.0017 | 1999 |
| Acaa2         | acetyl-Coenzyme A acyltransferase 2 (mitochondrial 3-oxoacyl-CoA | 1428146_s_at | -1.32 | 0.0227 | 2000 |
| Slit3         | slit homolog 3 (Drosophila)                                      | 1452296_at   | -1.32 | 0.0050 | 2001 |
| Vrk1          | vaccinia related kinase 1                                        | 1458951_at   | -1.32 | 0.0061 | 2002 |
| Gabra1        | gamma-aminobutyric acid (GABA) A receptor, subunit alpha 1       | 1421281_at   | -1.32 | 0.0117 | 2003 |
| BE991564      |                                                                  | 1459563_x_at | -1.32 | 0.0117 | 2004 |
| Klc3          | kinesin light chain 3                                            | 1425558_at   | 1.32  | 0.0072 | 2005 |
| Siva1         | SIVA1, apoptosis-inducing factor                                 | 1452020_a_at | -1.32 | 0.0307 | 2006 |
| Dnajc1        | DnaJ (Hsp40) homolog, subfamily C, member 1                      | 1420500_at   | 1.32  | 0.0017 | 2007 |
| Gm10001       | predicted gene 10001                                             | 1440534_at   | -1.32 | 0.0008 | 2008 |
| Tmem20        | transmembrane protein 20                                         | 1435452_at   | -1.32 | 0.0001 | 2009 |
| Apcdd1        | adenomatosis polyposis coli down-regulated 1                     | 1418382_at   | -1.32 | 0.0043 | 2010 |
| Gpr123        | G protein-coupled receptor 123                                   | 1459750_s_at | -1.32 | 0.0112 | 2011 |
| Cblb          | Casitas B-lineage lymphoma b                                     | 1455082_at   | -1.32 | 0.0179 | 2012 |
| Lmo4          | LIM domain only 4                                                | 1420981_a_at | 1.32  | 0.0375 | 2013 |
| Sdc4          | syndecan 4                                                       | 1448793_a_at | 1.32  | 0.0409 | 2014 |
| 3110082D06Rik | RIKEN cDNA 3110082D06 gene                                       | 1441559_at   | 1.32  | 0.0249 | 2015 |
| Mapk8ip1      | mitogen-activated protein kinase 8 interacting protein 1         | 1425679_a_at | 1.32  | 0.0055 | 2016 |
| 2810002D19Rik | RIKEN cDNA 2810002D19 gene                                       | 1452312_at   | -1.32 | 0.0058 | 2017 |
| B430203I24Rik | RIKEN cDNA B430203I24 gene                                       | 1440586_at   | -1.32 | 0.0353 | 2018 |
| Slc4a4        | solute carrier family 4 (anion exchanger), member 4              | 1426432_a_at | -1.32 | 0.0028 | 2019 |
| A930025H08Rik | RIKEN cDNA A930025H08 gene                                       | 1457261_at   | 1.32  | 0.0384 | 2020 |
| Wdr6          | WD repeat domain 6                                               | 1455940_x_at | -1.32 | 0.0366 | 2021 |
| Snx25         | sorting nexin 25                                                 | 1455020_at   | -1.32 | 0.0070 | 2022 |
| Mrpl54        | mitochondrial ribosomal protein L54                              | 1457378_at   | -1.32 | 0.0081 | 2023 |

|               |                                                                |              |       |          |      |
|---------------|----------------------------------------------------------------|--------------|-------|----------|------|
| Sox2ot        | SOX2 overlapping transcript (non-protein coding)               | 1460587_at   | -1.32 | 0.0036   | 2024 |
| Aim1l         | absent in melanoma 1-like                                      | 1437813_at   | 1.32  | 0.0392   | 2025 |
| Ppp1r13b      | protein phosphatase 1, regulatory (inhibitor) subunit 13B      | 1434895_s_at | -1.32 | 0.0067   | 2026 |
| 1446771_at    |                                                                | 1446771_at   | 1.32  | 0.0353   | 2027 |
| 1455250_at    |                                                                | 1455250_at   | -1.32 | 0.0012   | 2028 |
| A730035I17Rik | RIKEN cDNA A730035I17 gene                                     | 1431852_at   | 1.32  | 0.0449   | 2029 |
| AI843755      | expressed sequence AI843755                                    | 1457227_at   | -1.32 | 0.0119   | 2030 |
| Adap2         | ArfGAP with dual PH domains 2                                  | 1425638_at   | 1.32  | 0.0127   | 2031 |
| Mm.472852     |                                                                | 1435948_at   | 1.32  | 4.00E-05 | 2032 |
| Dcc           | deleted in colorectal carcinoma                                | 1441572_at   | -1.32 | 0.0386   | 2033 |
| 1434336_s_at  |                                                                | 1434336_s_at | 1.32  | 4.80E-05 | 2034 |
| 1440359_at    |                                                                | 1440359_at   | -1.32 | 0.0009   | 2035 |
| Fbxl7         | F-box and leucine-rich repeat protein 7                        | 1456220_at   | -1.32 | 0.0114   | 2036 |
| Atp2b2        | ATPase, Ca <sup>++</sup> transporting, plasma membrane 2       | 1433888_at   | 1.32  | 0.0064   | 2037 |
| 1442742_at    |                                                                | 1442742_at   | -1.32 | 0.0007   | 2038 |
| Upk1b         | uroplakin 1B                                                   | 1435831_at   | -1.32 | 0.0085   | 2039 |
| Maf           | avian musculoaponeurotic fibrosarcoma (v-maf) AS42 oncogene hc | 1437473_at   | 1.32  | 0.0246   | 2040 |
| Stxbp3a       | syntaxin binding protein 3A                                    | 1435058_x_at | 1.32  | 0.0048   | 2041 |
| Kcnv1         | potassium channel, subfamily V, member 1                       | 1429741_at   | 1.32  | 0.0456   | 2042 |
| Msn           | moesin                                                         | 1450379_at   | 1.32  | 0.0045   | 2043 |
| Mm.434851     |                                                                | 1444174_at   | -1.32 | 0.0021   | 2044 |
| St6gal2       | beta galactoside alpha 2,6 sialyltransferase 2                 | 1434819_at   | -1.32 | 0.0109   | 2045 |
| Ccdc69        | coiled-coil domain containing 69                               | 1419985_s_at | -1.32 | 0.0326   | 2046 |
| Shmt1         | serine hydroxymethyltransferase 1 (soluble)                    | 1425177_at   | -1.32 | 0.0418   | 2047 |
| Rad51l1       | RAD51-like 1 (S. cerevisiae)                                   | 1442531_at   | -1.32 | 0.0003   | 2048 |
| Gas1          | growth arrest specific 1                                       | 1416855_at   | -1.32 | 0.0005   | 2049 |
| 1455277_at    |                                                                | 1455277_at   | -1.32 | 0.0206   | 2050 |

|               |                                                                 |              |       |        |      |
|---------------|-----------------------------------------------------------------|--------------|-------|--------|------|
| B4galt1       | UDP-Gal:betaGlcNAc beta 1,4- galactosyltransferase, polypeptide | 1458616_at   | 1.32  | 0.0014 | 2051 |
| Itpkb         | inositol 1,4,5-trisphosphate 3-kinase B                         | 1435272_at   | 1.32  | 0.0154 | 2052 |
| Pxk           | PX domain containing serine/threonine kinase                    | 1451253_at   | 1.32  | 0.0025 | 2053 |
| Nanos1        | nanos homolog 1 (Drosophila)                                    | 1455877_a_at | -1.32 | 0.0110 | 2054 |
| Chdh          | choline dehydrogenase                                           | 1455435_s_at | -1.32 | 0.0171 | 2055 |
| 1441956_s_at  |                                                                 | 1441956_s_at | 1.32  | 0.0022 | 2056 |
| Tmem176a      | transmembrane protein 176A                                      | 1425603_at   | 1.32  | 0.0355 | 2057 |
| Serpina3g     | serine (or cysteine) peptidase inhibitor, clade A, member 3G    | 1424923_at   | 1.32  | 0.0221 | 2058 |
| Fam83d        | family with sequence similarity 83, member D                    | 1452924_at   | -1.32 | 0.0018 | 2059 |
| Spata1        | spermatogenesis associated 1                                    | 1429662_at   | -1.32 | 0.0223 | 2060 |
| Crip1         | cysteine-rich protein 1 (intestinal)                            | 1416326_at   | 1.32  | 0.0096 | 2061 |
| 1428623_at    |                                                                 | 1428623_at   | 1.32  | 0.0061 | 2062 |
| Mm.428316     |                                                                 | 1458184_at   | -1.32 | 0.0002 | 2063 |
| Arhgap20      | Rho GTPase activating protein 20                                | 1427522_at   | -1.32 | 0.0007 | 2064 |
| Angptl2       | angiopoietin-like 2                                             | 1455090_at   | 1.32  | 0.0095 | 2065 |
| Thsd7b        | thrombospondin, type I, domain containing 7B                    | 1460627_at   | 1.32  | 0.0095 | 2066 |
| Arhgef2       | rho/rac guanine nucleotide exchange factor (GEF) 2              | 1421042_at   | 1.32  | 0.0067 | 2067 |
| Arid3b        | AT rich interactive domain 3B (BRIGHT-like)                     | 1423526_at   | 1.32  | 0.0053 | 2068 |
| Dtna          | dystrobrevin alpha                                              | 1426066_a_at | 1.32  | 0.0045 | 2069 |
| Pacrg         | PARK2 co-regulated                                              | 1428751_at   | -1.32 | 0.0090 | 2070 |
| Phf2011       | PHD finger protein 20-like 1                                    | 1456871_a_at | 1.32  | 0.0036 | 2071 |
| BB233292      |                                                                 | 1441847_at   | 1.32  | 0.0297 | 2072 |
| Sgip1         | SH3-domain GRB2-like (endophilin) interacting protein 1         | 1435894_at   | -1.32 | 0.0011 | 2073 |
| Mett5d1       | methyltransferase 5 domain containing 1                         | 1452950_at   | 1.32  | 0.0434 | 2074 |
| Raph1         | Ras association (RalGDS/AF-6) and pleckstrin homology domains   | 1434302_at   | 1.32  | 0.0008 | 2075 |
| 1456922_at    |                                                                 | 1456922_at   | -1.32 | 0.0339 | 2076 |
| D630045J12Rik | RIKEN cDNA D630045J12 gene                                      | 1440116_at   | 1.32  | 0.0332 | 2077 |

|               |                                                                 |              |       |        |      |
|---------------|-----------------------------------------------------------------|--------------|-------|--------|------|
| 2610316D01Rik | RIKEN cDNA 2610316D01 gene                                      | 1458702_at   | -1.32 | 0.0021 | 2078 |
| Phf20I1       | PHD finger protein 20-like 1                                    | 1437563_at   | 1.32  | 0.0014 | 2079 |
| 3010001F23Rik | RIKEN cDNA 3010001F23 gene                                      | 1457010_at   | -1.32 | 0.0014 | 2080 |
| Limd2         | LIM domain containing 2                                         | 1456377_x_at | -1.32 | 0.0312 | 2081 |
| Baiap2        | brain-specific angiogenesis inhibitor 1-associated protein 2    | 1451027_at   | 1.32  | 0.0030 | 2082 |
| Slc22a4       | solute carrier family 22 (organic cation transporter), member 4 | 1417639_at   | 1.32  | 0.0042 | 2083 |
| 1421574_at    |                                                                 | 1421574_at   | -1.32 | 0.0070 | 2084 |
| 4933412E12Rik | RIKEN cDNA 4933412E12 gene                                      | 1447711_x_at | -1.32 | 0.0004 | 2085 |
| Dlg5          | discs, large homolog 5 (Drosophila)                             | 1424198_at   | -1.32 | 0.0097 | 2086 |
| Mm.375426     |                                                                 | 1443067_at   | 1.32  | 0.0096 | 2087 |
| Klf9          | Kruppel-like factor 9                                           | 1436952_at   | 1.32  | 0.0058 | 2088 |
| Mm.383825     |                                                                 | 1442262_at   | -1.32 | 0.0325 | 2089 |
| 1439753_x_at  |                                                                 | 1439753_x_at | -1.32 | 0.0115 | 2090 |
| Tmcc2         | transmembrane and coiled-coil domains 2                         | 1428108_x_at | -1.32 | 0.0024 | 2091 |
| Smc4          | structural maintenance of chromosomes 4                         | 1452197_at   | -1.31 | 0.0020 | 2092 |
| 1428814_at    |                                                                 | 1428814_at   | -1.31 | 0.0065 | 2093 |
| B3galnt2      | UDP-GalNAc:betaGlcNAc beta 1,3-galactosaminyltransferase, poly  | 1454842_a_at | 1.31  | 0.0488 | 2094 |
| 6720489N17Rik | RIKEN cDNA 6720489N17 gene                                      | 1457278_at   | -1.31 | 0.0329 | 2095 |
| Plcd3         | phospholipase C, delta 3                                        | 1431892_a_at | 1.31  | 0.0009 | 2096 |
| Cryl1         | crystallin, lambda 1                                            | 1416795_at   | -1.31 | 0.0019 | 2097 |
| 1440932_at    |                                                                 | 1440932_at   | -1.31 | 0.0101 | 2098 |
| Mm.40343      |                                                                 | 1438780_at   | 1.31  | 0.0181 | 2099 |
| Gm2612        | predicted gene 2612                                             | 1455460_at   | -1.31 | 0.0423 | 2100 |
| Ctnn          | cortactin                                                       | 1421315_s_at | -1.31 | 0.0015 | 2101 |
| Minpp1        | multiple inositol polyphosphate histidine phosphatase 1         | 1455787_x_at | -1.31 | 0.0253 | 2102 |
| Antxr2        | anthrax toxin receptor 2                                        | 1426708_at   | -1.31 | 0.0019 | 2103 |
| Tpm2          | tropomyosin 2, beta                                             | 1425028_a_at | 1.31  | 0.0037 | 2104 |

|               |                                                                     |              |       |        |      |
|---------------|---------------------------------------------------------------------|--------------|-------|--------|------|
| 1455766_at    |                                                                     | 1455766_at   | -1.31 | 0.0118 | 2105 |
| Ptprf         | protein tyrosine phosphatase, receptor type, F                      | 1420841_at   | 1.31  | 0.0326 | 2106 |
| Lgr6          | leucine-rich repeat-containing G protein-coupled receptor 6         | 1436218_at   | -1.31 | 0.0014 | 2107 |
| Il17d         | interleukin 17D                                                     | 1435714_x_at | -1.31 | 0.0047 | 2108 |
| Fam131a       | family with sequence similarity 131, member A                       | 1426729_at   | -1.31 | 0.0044 | 2109 |
| Pdgfa         | platelet derived growth factor, alpha                               | 1418711_at   | -1.31 | 0.0002 | 2110 |
| Taf7          | TAF7 RNA polymerase II, TATA box binding protein (TBP)-associa      | 1423170_at   | 1.31  | 0.0049 | 2111 |
| 6030422H21Rik | RIKEN cDNA 6030422H21 gene                                          | 1441799_at   | 1.31  | 0.0408 | 2112 |
| Slc25a30      | solute carrier family 25, member 30                                 | 1425948_a_at | 1.31  | 0.0026 | 2113 |
| Wif1          | Wnt inhibitory factor 1                                             | 1425425_a_at | 1.31  | 0.0008 | 2114 |
| 1446409_at    |                                                                     | 1446409_at   | -1.31 | 0.0377 | 2115 |
| Camk2d        | calcium/calmodulin-dependent protein kinase II, delta               | 1422659_at   | -1.31 | 0.0265 | 2116 |
| Sreb2         | sterol regulatory element binding factor 2                          | 1452174_at   | 1.31  | 0.0488 | 2117 |
| 1441047_at    |                                                                     | 1441047_at   | -1.31 | 0.0078 | 2118 |
| Usp50         | ubiquitin specific peptidase 50                                     | 1453670_at   | -1.31 | 0.0215 | 2119 |
| Ppp3r1        | protein phosphatase 3, regulatory subunit B, alpha isoform (calcine | 1450368_a_at | 1.31  | 0.0030 | 2120 |
| Gria4         | glutamate receptor, ionotropic, AMPA4 (alpha 4)                     | 1443285_at   | -1.31 | 0.0082 | 2121 |
| D930015E06Rik | RIKEN cDNA D930015E06 gene                                          | 1426834_s_at | -1.31 | 0.0261 | 2122 |
| Ttl8          | tubulin tyrosine ligase-like family, member 8                       | 1439140_at   | 1.31  | 0.0238 | 2123 |
| Rtn4r1        | reticulon 4 receptor-like 1                                         | 1436868_at   | 1.31  | 0.0135 | 2124 |
| Rnf166        | ring finger protein 166                                             | 1436906_at   | 1.31  | 0.0124 | 2125 |
| Laptm4b       | lysosomal-associated protein transmembrane 4B                       | 1416148_at   | -1.31 | 0.0043 | 2126 |
| Ifnar2        | interferon (alpha and beta) receptor 2                              | 1451462_a_at | 1.31  | 0.0009 | 2127 |
| 1452929_at    |                                                                     | 1452929_at   | -1.31 | 0.0008 | 2128 |
| BB078680      |                                                                     | 1459802_at   | -1.31 | 0.0282 | 2129 |
| Syt14         | synaptotagmin-like 4                                                | 1417336_a_at | 1.31  | 0.0353 | 2130 |
| Ehhadh        | enoyl-Coenzyme A, hydratase/3-hydroxyacyl Coenzyme A dehydr         | 1448382_at   | -1.31 | 0.0287 | 2131 |

|            |                                                              |              |       |          |      |
|------------|--------------------------------------------------------------|--------------|-------|----------|------|
| Zfp286     | zinc finger protein 286                                      | 1425080_at   | -1.31 | 0.0116   | 2132 |
| 1443620_at |                                                              | 1443620_at   | -1.31 | 0.0168   | 2133 |
| Igf1       | insulin-like growth factor 1                                 | 1419519_at   | 1.31  | 0.0096   | 2134 |
| H2-D1      | histocompatibility 2, D region locus 1                       | 1451683_x_at | 1.31  | 0.0072   | 2135 |
| Mast3      | microtubule associated serine/threonine kinase 3             | 1435666_at   | 1.31  | 0.0022   | 2136 |
| Mm.274839  |                                                              | 1434982_at   | -1.31 | 0.0009   | 2137 |
| Tfdp2      | transcription factor Dp 2                                    | 1437174_at   | 1.31  | 0.0062   | 2138 |
| Bex4       | brain expressed gene 4                                       | 1428209_at   | -1.31 | 0.0123   | 2139 |
| BB376947   |                                                              | 1438577_at   | -1.31 | 0.0317   | 2140 |
| Gucy1b3    | guanylate cyclase 1, soluble, beta 3                         | 1420872_at   | -1.31 | 0.0032   | 2141 |
| Prkar2b    | protein kinase, cAMP dependent regulatory, type II beta      | 1438664_at   | 1.31  | 0.0043   | 2142 |
| Igsf3      | immunoglobulin superfamily, member 3                         | 1455048_at   | 1.31  | 0.0018   | 2143 |
| Xkr8       | X Kell blood group precursor related family member 8 homolog | 1439590_at   | -1.31 | 0.0105   | 2144 |
| 1439515_at |                                                              | 1439515_at   | 1.31  | 0.0260   | 2145 |
| Hes6       | hairy and enhancer of split 6 (Drosophila)                   | 1452021_a_at | -1.31 | 0.0027   | 2146 |
| Agfg1      | ArfGAP with FG repeats 1                                     | 1426922_s_at | 1.31  | 0.0144   | 2147 |
| BB427458   |                                                              | 1446327_at   | -1.31 | 0.0012   | 2148 |
| Pdgfra     | platelet derived growth factor receptor, alpha polypeptide   | 1421917_at   | -1.31 | 2.90E-05 | 2149 |
| Cytip      | cytohesin 1 interacting protein                              | 1435697_a_at | 1.31  | 0.0172   | 2150 |
| Cspg5      | chondroitin sulfate proteoglycan 5                           | 1450713_at   | -1.31 | 0.0064   | 2151 |
| Slc12a7    | solute carrier family 12, member 7                           | 1418257_at   | -1.31 | 0.0016   | 2152 |
| Obfc2a     | oligonucleotide/oligosaccharide-binding fold containing 2A   | 1430623_s_at | -1.31 | 0.0173   | 2153 |
| Gm12371    | predicted gene 12371                                         | 1440361_at   | -1.31 | 0.0065   | 2154 |
| Bnc2       | basonuclin 2                                                 | 1438861_at   | 1.31  | 0.0043   | 2155 |
| Mta3       | metastasis associated 3                                      | 1421402_at   | -1.31 | 0.0024   | 2156 |
| Cxxc5      | CXXC finger 5                                                | 1448960_at   | 1.31  | 0.0408   | 2157 |
| Coro1a     | coronin, actin binding protein 1A                            | 1455269_a_at | -1.31 | 0.0182   | 2158 |



|               |                                                                         |              |       |        |      |
|---------------|-------------------------------------------------------------------------|--------------|-------|--------|------|
| Tgfb1         | transforming growth factor, beta induced                                | 1415871_at   | 1.31  | 0.0062 | 2159 |
| Mm.400368     |                                                                         | 1440388_at   | -1.31 | 0.0128 | 2160 |
| 2010109N14Rik | RIKEN cDNA 2010109N14 gene                                              | 1435524_at   | -1.31 | 0.0034 | 2161 |
| 1423825_at    |                                                                         | 1423825_at   | 1.31  | 0.0377 | 2162 |
| Vwa3a         | von Willebrand factor A domain containing 3A                            | 1456129_at   | -1.31 | 0.0408 | 2163 |
| Adcy6         | adenylate cyclase 6                                                     | 1418128_at   | -1.31 | 0.0006 | 2164 |
| Dtx4          | deltex 4 homolog (Drosophila)                                           | 1436545_at   | 1.31  | 0.0265 | 2165 |
| Gpr123        | G protein-coupled receptor 123                                          | 1429696_at   | -1.31 | 0.0046 | 2166 |
| Rab27a        | RAB27A, member RAS oncogene family                                      | 1425284_a_at | -1.31 | 0.0192 | 2167 |
| Atp10d        | ATPase, class V, type 10D                                               | 1436544_at   | -1.31 | 0.0283 | 2168 |
| D11Bwg0517e   | DNA segment, Chr 11, Brigham & Women's Genetics 0517 expressed          | 1427286_at   | 1.31  | 0.0049 | 2169 |
| Pnmt          | phenylethanolamine-N-methyltransferase                                  | 1450606_at   | 1.31  | 0.0436 | 2170 |
| 1430307_a_at  |                                                                         | 1430307_a_at | 1.31  | 0.0161 | 2171 |
| Thbs3         | thrombospondin 3                                                        | 1416623_at   | -1.31 | 0.0019 | 2172 |
| Ttll1         | tubulin tyrosine ligase-like 1                                          | 1426427_at   | -1.31 | 0.0038 | 2173 |
| Tyrp1         | tyrosinase-related protein 1                                            | 1439409_x_at | -1.31 | 0.0088 | 2174 |
| Haus4         | HAUS augmin-like complex, subunit 4                                     | 1451103_at   | -1.31 | 0.0054 | 2175 |
| Baiap2        | brain-specific angiogenesis inhibitor 1-associated protein 2            | 1425656_a_at | 1.31  | 0.0020 | 2176 |
| Nppc          | natriuretic peptide precursor type C                                    | 1422790_at   | -1.31 | 0.0016 | 2177 |
| Prkdc         | protein kinase, DNA activated, catalytic polypeptide                    | 1451576_at   | -1.31 | 0.0347 | 2178 |
| Shisa6        | shisa homolog 6 (Xenopus laevis)                                        | 1455512_at   | 1.31  | 0.0022 | 2179 |
| Mm.382088     |                                                                         | 1447365_at   | -1.31 | 0.0034 | 2180 |
| Ubash3b       | ubiquitin associated and SH3 domain containing, B                       | 1429475_at   | 1.31  | 0.0397 | 2181 |
| Slc25a29      | solute carrier family 25 (mitochondrial carrier, palmitoylcarnitine tra | 1423979_a_at | -1.31 | 0.0007 | 2182 |
| 1452342_at    |                                                                         | 1452342_at   | 1.31  | 0.0022 | 2183 |
| 1435445_at    |                                                                         | 1435445_at   | 1.31  | 0.0207 | 2184 |
| 1440975_at    |                                                                         | 1440975_at   | -1.31 | 0.0010 | 2185 |

|               |                                                                      |              |       |        |      |
|---------------|----------------------------------------------------------------------|--------------|-------|--------|------|
| Vat1l         | vesicle amine transport protein 1 homolog-like (T. californica)      | 1433551_at   | 1.31  | 0.0262 | 2186 |
| 1455451_at    |                                                                      | 1455451_at   | -1.31 | 0.0372 | 2187 |
| 1453363_at    |                                                                      | 1453363_at   | 1.31  | 0.0016 | 2188 |
| Ppp4r1        | protein phosphatase 4, regulatory subunit 1                          | 1424294_at   | 1.31  | 0.0003 | 2189 |
| 1810011O10Rik | RIKEN cDNA 1810011O10 gene                                           | 1451415_at   | 1.31  | 0.0393 | 2190 |
| 4933427D14Rik | RIKEN cDNA 4933427D14 gene                                           | 1433998_at   | 1.31  | 0.0165 | 2191 |
| Mab21l2       | mab-21-like 2 (C. elegans)                                           | 1443739_at   | -1.30 | 0.0130 | 2192 |
| Sclt1         | sodium channel and clathrin linker 1                                 | 1455608_at   | 1.30  | 0.0253 | 2193 |
| 6430537K16Rik | RIKEN cDNA 6430537K16 gene                                           | 1438878_at   | -1.30 | 0.0464 | 2194 |
| Twf2          | twinfilin, actin-binding protein, homolog 2 (Drosophila)             | 1431292_a_at | 1.30  | 0.0468 | 2195 |
| Lrrtm1        | leucine rich repeat transmembrane neuronal 1                         | 1437746_at   | -1.30 | 0.0034 | 2196 |
| Slc16a4       | solute carrier family 16 (monocarboxylic acid transporters), membe   | 1426082_a_at | 1.30  | 0.0087 | 2197 |
| Emx2os        | empty spiracles homolog 2 (Drosophila) opposite strand               | 1456559_at   | -1.30 | 0.0163 | 2198 |
| Adamts18      | a disintegrin-like and metallopeptidase (reprolysin type) with throm | 1444253_at   | 1.30  | 0.0002 | 2199 |
| Brwd1         | bromodomain and WD repeat domain containing 1                        | 1433955_at   | 1.30  | 0.0419 | 2200 |
| Spire1        | spire homolog 1 (Drosophila)                                         | 1459548_at   | 1.30  | 0.0005 | 2201 |
| 6430411K18Rik | RIKEN cDNA 6430411K18 gene                                           | 1453446_at   | 1.30  | 0.0327 | 2202 |
| Clstn2        | calsyntenin 2                                                        | 1422158_at   | 1.30  | 0.0119 | 2203 |
| Rit2          | Ras-like without CAAX 2                                              | 1460166_at   | -1.30 | 0.0188 | 2204 |
| Igdcc4        | immunoglobulin superfamily, DCC subclass, member 4                   | 1416474_at   | -1.30 | 0.0334 | 2205 |
| 1457526_at    |                                                                      | 1457526_at   | -1.30 | 0.0213 | 2206 |
| Taf13         | TAF13 RNA polymerase II, TATA box binding protein (TBP)-associ       | 1448707_at   | 1.30  | 0.0397 | 2207 |
| 1434859_at    |                                                                      | 1434859_at   | -1.30 | 0.0003 | 2208 |
| LOC553095     | hypothetical LOC553095                                               | 1455557_at   | -1.30 | 0.0073 | 2209 |
| Hn1           | hematological and neurological expressed sequence 1                  | 1416028_a_at | 1.30  | 0.0005 | 2210 |
| 1434758_at    |                                                                      | 1434758_at   | 1.30  | 0.0263 | 2211 |
| Palm2         | paralemmin 2                                                         | 1459377_at   | -1.30 | 0.0396 | 2212 |

|               |                                                                  |              |       |          |      |
|---------------|------------------------------------------------------------------|--------------|-------|----------|------|
| Ncrna00085    | non-protein coding RNA 85                                        | 1430959_at   | 1.30  | 0.0035   | 2213 |
| Scn3b         | sodium channel, voltage-gated, type III, beta                    | 1435767_at   | -1.30 | 0.0468   | 2214 |
| 2810416A17Rik | RIKEN cDNA 2810416A17 gene                                       | 1433266_at   | -1.30 | 0.0329   | 2215 |
| Usp27x        | ubiquitin specific peptidase 27, X chromosome                    | 1436004_at   | 1.30  | 0.0093   | 2216 |
| Fgf18         | fibroblast growth factor 18                                      | 1449545_at   | -1.30 | 0.0030   | 2217 |
| Dagla         | diacylglycerol lipase, alpha                                     | 1455448_at   | 1.30  | 0.0265   | 2218 |
| Dhodh         | dihydroorotate dehydrogenase                                     | 1417582_s_at | -1.30 | 0.0024   | 2219 |
| Rcor2         | REST corepressor 2                                               | 1417302_at   | -1.30 | 0.0008   | 2220 |
| Ift20         | intraflagellar transport 20 homolog (Chlamydomonas)              | 1451412_a_at | 1.30  | 0.0152   | 2221 |
| Ctsb          | cathepsin B                                                      | 1448732_at   | 1.30  | 0.0163   | 2222 |
| Mkrn1         | makorin, ring finger protein, 1                                  | 1455504_a_at | 1.30  | 0.0318   | 2223 |
| Xbp1          | X-box binding protein 1                                          | 1420011_s_at | 1.30  | 0.0218   | 2224 |
| Rimklb        | ribosomal modification protein rimK-like family member B         | 1429981_a_at | -1.30 | 0.0306   | 2225 |
| Zfp652        | zinc finger protein 652                                          | 1456520_at   | 1.30  | 0.0421   | 2226 |
| Stxbp1        | syntaxin binding protein 1                                       | 1420506_a_at | 1.30  | 0.0221   | 2227 |
| Mylk          | myosin, light polypeptide kinase                                 | 1425505_at   | 1.30  | 0.0188   | 2228 |
| Gabra1        | gamma-aminobutyric acid (GABA) A receptor, subunit alpha 1       | 1421280_at   | -1.30 | 0.0255   | 2229 |
| 1500009L16Rik | RIKEN cDNA 1500009L16 gene                                       | 1452840_at   | -1.30 | 0.0009   | 2230 |
| 1449187_at    |                                                                  | 1449187_at   | -1.30 | 8.00E-05 | 2231 |
| Ttl           | tubulin tyrosine ligase                                          | 1451630_at   | 1.30  | 0.0007   | 2232 |
| Taf4a         | TAF4A RNA polymerase II, TATA box binding protein (TBP)-associ   | 1452438_s_at | 1.30  | 0.0040   | 2233 |
| Dci           | dodecenoyl-Coenzyme A delta isomerase (3,2 trans-enoyl-Coenyn    | 1418321_at   | -1.30 | 0.0107   | 2234 |
| Unkl          | unkempt-like (Drosophila)                                        | 1428565_at   | -1.30 | 0.0157   | 2235 |
| Mm.372000     |                                                                  | 1457494_at   | -1.30 | 0.0112   | 2236 |
| Arl5b         | ADP-ribosylation factor-like 5B                                  | 1453590_at   | 1.30  | 0.0165   | 2237 |
| Accn1         | amiloride-sensitive cation channel 1, neuronal (degenerin)       | 1417994_a_at | -1.30 | 0.0024   | 2238 |
| Malat1        | metastasis associated lung adenocarcinoma transcript 1 (non-codi | 1429060_at   | 1.30  | 0.0220   | 2239 |

|               |                                                                    |              |       |          |      |
|---------------|--------------------------------------------------------------------|--------------|-------|----------|------|
| Sst           | somatostatin                                                       | 1417954_at   | -1.30 | 0.0047   | 2240 |
| Prkd2         | protein kinase D2                                                  | 1436589_x_at | 1.30  | 0.0079   | 2241 |
| Dock7         | dedicator of cytokinesis 7                                         | 1440895_at   | 1.30  | 0.0004   | 2242 |
| E230008O15Rik | RIKEN cDNA E230008O15 gene                                         | 1439673_at   | -1.30 | 0.0332   | 2243 |
| Trpc7         | transient receptor potential cation channel, subfamily C, member 7 | 1420561_at   | -1.30 | 0.0226   | 2244 |
| Atp2b3        | ATPase, Ca <sup>++</sup> transporting, plasma membrane 3           | 1442645_at   | 1.30  | 0.0016   | 2245 |
| Rcor1         | REST corepressor 1                                                 | 1437545_at   | 1.30  | 0.0027   | 2246 |
| Gpr177        | G protein-coupled receptor 177                                     | 1437434_a_at | 1.30  | 0.0181   | 2247 |
| Vps37a        | vacuolar protein sorting 37A (yeast)                               | 1429363_at   | 1.30  | 0.0481   | 2248 |
| Siva1         | SIVA1, apoptosis-inducing factor                                   | 1426323_x_at | -1.30 | 0.0287   | 2249 |
| Atxn7         | ataxin 7                                                           | 1442946_at   | -1.30 | 0.0216   | 2250 |
| Cdk6          | cyclin-dependent kinase 6                                          | 1440040_at   | 1.30  | 0.0155   | 2251 |
| 1456685_at    |                                                                    | 1456685_at   | -1.30 | 0.0015   | 2252 |
| Fam100a       | family with sequence similarity 100, member A                      | 1424871_s_at | 1.30  | 1.40E-05 | 2253 |
| Gramd4        | GRAM domain containing 4                                           | 1452151_at   | 1.30  | 0.0003   | 2254 |
| Enpp1         | ectonucleotide pyrophosphatase/phosphodiesterase 1                 | 1419276_at   | 1.30  | 0.0407   | 2255 |
| A330102K18Rik | RIKEN cDNA A330102K18 gene                                         | 1433257_at   | 1.30  | 0.0402   | 2256 |
| Twf2          | twinfilin, actin-binding protein, homolog 2 (Drosophila)           | 1439440_x_at | 1.30  | 0.0415   | 2257 |
| Slc35f4       | solute carrier family 35, member F4                                | 1452263_at   | -1.30 | 0.0174   | 2258 |
| Gm10421       | predicted gene 10421                                               | 1442558_at   | -1.30 | 0.0323   | 2259 |
| 1454735_at    |                                                                    | 1454735_at   | -1.30 | 0.0073   | 2260 |
| 5930409G06Rik | RIKEN cDNA 5930409G06 gene                                         | 1430745_at   | -1.30 | 0.0041   | 2261 |
| BB040139      |                                                                    | 1444828_at   | 1.30  | 0.0048   | 2262 |
| 1433423_at    |                                                                    | 1433423_at   | -1.30 | 0.0128   | 2263 |
| Parp1         | poly (ADP-ribose) polymerase family, member 1                      | 1435368_a_at | -1.30 | 0.0129   | 2264 |
| Limd2         | LIM domain containing 2                                            | 1447766_x_at | -1.30 | 0.0349   | 2265 |
| BB223643      |                                                                    | 1436692_at   | -1.30 | 0.0331   | 2266 |

|               |                                                                    |              |       |          |      |
|---------------|--------------------------------------------------------------------|--------------|-------|----------|------|
| 5033414D02Rik | RIKEN cDNA 5033414D02 gene                                         | 1460361_at   | 1.30  | 0.0147   | 2267 |
| Ntng1         | netrin G1                                                          | 1426338_a_at | -1.30 | 0.0174   | 2268 |
| Med8          | mediator of RNA polymerase II transcription, subunit 8 homolog (ye | 1431423_a_at | 1.30  | 0.0038   | 2269 |
| Slc40a1       | solute carrier family 40 (iron-regulated transporter), member 1    | 1448566_at   | -1.30 | 0.0010   | 2270 |
| Tmem108       | transmembrane protein 108                                          | 1454729_at   | 1.30  | 0.0273   | 2271 |
| Kcnj6         | potassium inwardly-rectifying channel, subfamily J, member 6       | 1450294_a_at | 1.30  | 0.0165   | 2272 |
| Nat13         | N-acetyltransferase 13                                             | 1428410_at   | 1.29  | 0.0061   | 2273 |
| Far1          | fatty acyl CoA reductase 1                                         | 1426369_at   | 1.29  | 0.0045   | 2274 |
| Mtch2         | mitochondrial carrier homolog 2 (C. elegans)                       | 1448654_at   | -1.29 | 0.0027   | 2275 |
| 1454932_at    |                                                                    | 1454932_at   | 1.29  | 5.20E-05 | 2276 |
| Meg3          | maternally expressed 3                                             | 1436057_at   | 1.29  | 0.0182   | 2277 |
| AI504432      | expressed sequence AI504432                                        | 1455161_at   | -1.29 | 0.0011   | 2278 |
| 4930534B04Rik | RIKEN cDNA 4930534B04 gene                                         | 1441867_x_at | -1.29 | 0.0324   | 2279 |
| Kcnip4        | Kv channel interacting protein 4                                   | 1451840_at   | -1.29 | 0.0197   | 2280 |
| 1442811_at    |                                                                    | 1442811_at   | -1.29 | 0.0080   | 2281 |
| 1439079_a_at  |                                                                    | 1439079_a_at | 1.29  | 0.0222   | 2282 |
| 1450541_at    |                                                                    | 1450541_at   | -1.29 | 0.0052   | 2283 |
| 1434005_at    |                                                                    | 1434005_at   | 1.29  | 0.0475   | 2284 |
| Meg3          | maternally expressed 3                                             | 1439380_x_at | 1.29  | 0.0008   | 2285 |
| 1444317_at    |                                                                    | 1444317_at   | -1.29 | 0.0132   | 2286 |
| Anp32e        | acidic (leucine-rich) nuclear phosphoprotein 32 family, member E   | 1451356_at   | 1.29  | 0.0104   | 2287 |
| Kcnd2         | potassium voltage-gated channel, Shal-related family, member 2     | 1450773_at   | -1.29 | 0.0012   | 2288 |
| Tmem176a      | transmembrane protein 176A                                         | 1423909_at   | 1.29  | 0.0239   | 2289 |
| Oma1          | OMA1 homolog, zinc metallopeptidase (S. cerevisiae)                | 1424299_at   | -1.29 | 6.90E-05 | 2290 |
| Gpr116        | G protein-coupled receptor 116                                     | 1440830_at   | 1.29  | 0.0072   | 2291 |
| Cited2        | Cbp/p300-interacting transactivator, with Glu/Asp-rich carboxy-t   | 1421267_a_at | -1.29 | 0.0146   | 2292 |
| Agfg1         | ArfGAP with FG repeats 1                                           | 1426923_at   | 1.29  | 0.0237   | 2293 |

|              |                                                         |              |       |          |      |
|--------------|---------------------------------------------------------|--------------|-------|----------|------|
| 1455314_at   |                                                         | 1455314_at   | -1.29 | 0.0039   | 2294 |
| 1436070_at   |                                                         | 1436070_at   | -1.29 | 0.0002   | 2295 |
| Arrdc2       | arrestin domain containing 2                            | 1428352_at   | 1.29  | 0.0125   | 2296 |
| Shisa6       | shisa homolog 6 ( <i>Xenopus laevis</i> )               | 1441785_at   | 1.29  | 0.0060   | 2297 |
| Ubtf         | upstream binding transcription factor, RNA polymerase I | 1453097_a_at | 1.29  | 0.0001   | 2298 |
| Ammecr1l     | AMME chromosomal region gene 1-like                     | 1428904_at   | 1.29  | 0.0138   | 2299 |
| 1434150_a_at |                                                         | 1434150_a_at | -1.29 | 0.0452   | 2300 |
| Rims2        | regulating synaptic membrane exocytosis 2               | 1450761_s_at | 1.29  | 0.0089   | 2301 |
| Selm         | selenoprotein M                                         | 1424394_at   | -1.29 | 0.0002   | 2302 |
| Fxyd2        | FXD domain-containing ion transport regulator 2         | 1419378_a_at | 1.29  | 0.0497   | 2303 |
| Mkrn1        | makorin, ring finger protein, 1                         | 1451425_a_at | 1.29  | 0.0319   | 2304 |
| 1435043_at   |                                                         | 1435043_at   | 1.29  | 0.0029   | 2305 |
| Ptpn         | protein tyrosine phosphatase, receptor type, N          | 1416588_at   | 1.29  | 0.0415   | 2306 |
| Rfx7         | regulatory factor X, 7                                  | 1460567_at   | 1.29  | 0.0017   | 2307 |
| Mageh1       | melanoma antigen, family H, 1                           | 1422498_at   | -1.29 | 9.40E-07 | 2308 |
| Phgdh        | 3-phosphoglycerate dehydrogenase                        | 1426658_x_at | -1.29 | 0.0210   | 2309 |
| Ipcef1       | interaction protein for cytohesin exchange factors 1    | 1441791_at   | -1.29 | 0.0395   | 2310 |
| Cks1b        | CDC28 protein kinase 1b                                 | 1448441_at   | 1.29  | 0.0080   | 2311 |
| Rps6ka3      | ribosomal protein S6 kinase polypeptide 3               | 1455206_at   | 1.29  | 0.0016   | 2312 |
| Zfp385b      | zinc finger protein 385B                                | 1436731_at   | 1.29  | 0.0242   | 2313 |
| Trim8        | tripartite motif protein 8                              | 1418577_at   | -1.29 | 9.90E-05 | 2314 |
| Epha3        | Eph receptor A3                                         | 1425574_at   | 1.29  | 0.0030   | 2315 |
| 1460007_at   |                                                         | 1460007_at   | -1.29 | 0.0094   | 2316 |
| Cdk9         | cyclin-dependent kinase 9 (CDC2-related kinase)         | 1417269_at   | 1.29  | 0.0002   | 2317 |
| Timp3        | tissue inhibitor of metalloproteinase 3                 | 1449335_at   | 1.29  | 0.0326   | 2318 |
| Shb          | src homology 2 domain-containing transforming protein B | 1434153_at   | 1.29  | 0.0193   | 2319 |
| Fam101a      | family with sequence similarity 101, member A           | 1453192_at   | 1.29  | 0.0328   | 2320 |

|               |                                                                   |              |       |        |      |
|---------------|-------------------------------------------------------------------|--------------|-------|--------|------|
| C2            | complement component 2 (within H-2S)                              | 1457664_x_at | 1.29  | 0.0223 | 2321 |
| Xbp1          | X-box binding protein 1                                           | 1437223_s_at | 1.29  | 0.0106 | 2322 |
| Nfya          | nuclear transcription factor-Y alpha                              | 1452560_a_at | 1.29  | 0.0065 | 2323 |
| 1446712_at    |                                                                   | 1446712_at   | -1.29 | 0.0427 | 2324 |
| Gabra2        | gamma-aminobutyric acid (GABA) A receptor, subunit alpha 2        | 1421738_at   | -1.29 | 0.0306 | 2325 |
| 1700013G23Rik | RIKEN cDNA 1700013G23 gene                                        | 1438378_at   | 1.29  | 0.0080 | 2326 |
| 2410024N18Rik | RIKEN cDNA 2410024N18 gene                                        | 1452914_at   | -1.29 | 0.0087 | 2327 |
| C2            | complement component 2 (within H-2S)                              | 1441912_x_at | 1.29  | 0.0058 | 2328 |
| Lilrb4        | leukocyte immunoglobulin-like receptor, subfamily B, member 4     | 1420394_s_at | 1.29  | 0.0423 | 2329 |
| D130037M23Rik | RIKEN cDNA D130037M23 gene                                        | 1457321_at   | 1.29  | 0.0391 | 2330 |
| 1440147_at    |                                                                   | 1440147_at   | -1.29 | 0.0138 | 2331 |
| 1435126_at    |                                                                   | 1435126_at   | 1.29  | 0.0006 | 2332 |
| Rwdd2a        | RWD domain containing 2A                                          | 1428963_at   | -1.29 | 0.0051 | 2333 |
| Rpap3         | RNA polymerase II associated protein 3                            | 1448555_at   | 1.29  | 0.0005 | 2334 |
| Zbtb34        | zinc finger and BTB domain containing 34                          | 1436085_at   | -1.29 | 0.0108 | 2335 |
| Dcaf10        | DDB1 and CUL4 associated factor 10                                | 1438727_at   | 1.29  | 0.0009 | 2336 |
| Man1a2        | mannosidase, alpha, class 1A, member 2                            | 1420976_at   | 1.29  | 0.0201 | 2337 |
| Hsd3b7        | hydroxy-delta-5-steroid dehydrogenase, 3 beta- and steroid delta- | 1416968_a_at | 1.29  | 0.0287 | 2338 |
| Slc31a2       | solute carrier family 31, member 2                                | 1416654_at   | -1.29 | 0.0137 | 2339 |
| E2f1          | E2F transcription factor 1                                        | 1431875_a_at | 1.29  | 0.0021 | 2340 |
| Steap2        | six transmembrane epithelial antigen of prostate 2                | 1428636_at   | 1.29  | 0.0314 | 2341 |
| 1446180_at    |                                                                   | 1446180_at   | -1.29 | 0.0034 | 2342 |
| 1455679_at    |                                                                   | 1455679_at   | -1.29 | 0.0170 | 2343 |
| 1418824_at    |                                                                   | 1418824_at   | 1.29  | 0.0024 | 2344 |
| C79557        | expressed sequence C79557                                         | 1459088_at   | -1.29 | 0.0065 | 2345 |
| Mm.269712     |                                                                   | 1439804_at   | -1.29 | 0.0398 | 2346 |
| Epha4         | Eph receptor A4                                                   | 1421928_at   | 1.29  | 0.0099 | 2347 |

|               |                                                                   |              |       |        |      |
|---------------|-------------------------------------------------------------------|--------------|-------|--------|------|
| Ttyh3         | tweety homolog 3 (Drosophila)                                     | 1454978_at   | 1.29  | 0.0080 | 2348 |
| 1430626_at    |                                                                   | 1430626_at   | 1.29  | 0.0166 | 2349 |
| 1448016_at    |                                                                   | 1448016_at   | -1.29 | 0.0054 | 2350 |
| Odz4          | odd Oz/ten-m homolog 4 (Drosophila)                               | 1451888_a_at | 1.29  | 0.0326 | 2351 |
| Vip           | vasoactive intestinal polypeptide                                 | 1428664_at   | 1.29  | 0.0470 | 2352 |
| Tshz1         | teashirt zinc finger family member 1                              | 1427232_at   | 1.29  | 0.0195 | 2353 |
| Kcnn3         | potassium intermediate/small conductance calcium-activated char   | 1459308_at   | -1.29 | 0.0052 | 2354 |
| 1700019D03Rik | RIKEN cDNA 1700019D03 gene                                        | 1430368_s_at | -1.29 | 0.0391 | 2355 |
| Kcnc4         | potassium voltage gated channel, Shaw-related subfamily, member   | 1425090_s_at | -1.29 | 0.0081 | 2356 |
| Mm.287851     |                                                                   | 1437003_at   | 1.29  | 0.0397 | 2357 |
| Sntg2         | syntrophin, gamma 2                                               | 1418789_at   | -1.29 | 0.0116 | 2358 |
| Mrpl23        | mitochondrial ribosomal protein L23                               | 1416948_at   | -1.29 | 0.0101 | 2359 |
| BB470469      |                                                                   | 1441230_at   | 1.29  | 0.0314 | 2360 |
| Tmem35        | transmembrane protein 35                                          | 1416710_at   | -1.29 | 0.0002 | 2361 |
| 1439498_at    |                                                                   | 1439498_at   | -1.29 | 0.0381 | 2362 |
| Fert2         | fer (fms/fps related) protein kinase, testis specific 2           | 1426090_a_at | 1.29  | 0.0115 | 2363 |
| Ncor2         | nuclear receptor co-repressor 2                                   | 1448893_at   | 1.29  | 0.0025 | 2364 |
| Snta1         | syntrophin, acidic 1                                              | 1416825_at   | 1.29  | 0.0407 | 2365 |
| Gcnt2         | glucosaminyl (N-acetyl) transferase 2, I-branching enzyme         | 1421415_s_at | -1.29 | 0.0019 | 2366 |
| Ckmt1         | creatine kinase, mitochondrial 1, ubiquitous                      | 1417089_a_at | -1.29 | 0.0002 | 2367 |
| Ucma          | upper zone of growth plate and cartilage matrix associated        | 1428994_s_at | 1.29  | 0.0019 | 2368 |
| Bbx           | bobby sox homolog (Drosophila)                                    | 1458602_at   | 1.29  | 0.0472 | 2369 |
| 4930556H04Rik | RIKEN cDNA 4930556H04 gene                                        | 1453543_at   | -1.29 | 0.0007 | 2370 |
| Plekhf1       | pleckstrin homology domain containing, family F (with FYVE domair | 1424671_at   | 1.29  | 0.0162 | 2371 |
| Atmin         | ATM interactor                                                    | 1434143_at   | 1.29  | 0.0021 | 2372 |
| 2700038G22Rik | RIKEN cDNA 2700038G22 gene                                        | 1453745_at   | -1.29 | 0.0196 | 2373 |
| Opalin        | oligodendrocytic myelin paranodal and inner loop protein          | 1435854_at   | -1.29 | 0.0417 | 2374 |



|               |                                                                 |              |       |        |      |
|---------------|-----------------------------------------------------------------|--------------|-------|--------|------|
| Aldh1a3       | aldehyde dehydrogenase family 1, subfamily A3                   | 1417642_at   | 1.28  | 0.0250 | 2375 |
| Vstm2b        | V-set and transmembrane domain containing 2B                    | 1447425_at   | -1.28 | 0.0468 | 2376 |
| Dnm3          | dynamin 3                                                       | 1446431_at   | -1.28 | 0.0073 | 2377 |
| Jsrp1         | junctional sarcoplasmic reticulum protein 1                     | 1432289_a_at | 1.28  | 0.0148 | 2378 |
| 1442920_at    |                                                                 | 1442920_at   | 1.28  | 0.0298 | 2379 |
| Mex3b         | mex3 homolog B (C. elegans)                                     | 1437152_at   | -1.28 | 0.0012 | 2380 |
| C1qa          | complement component 1, q subcomponent, alpha polypeptide       | 1417381_at   | 1.28  | 0.0303 | 2381 |
| Tctn2         | tectonic family member 2                                        | 1423224_at   | -1.28 | 0.0133 | 2382 |
| Plxna3        | plexin A3                                                       | 1420996_at   | -1.28 | 0.0195 | 2383 |
| Igsf3         | immunoglobulin superfamily, member 3                            | 1455049_at   | 1.28  | 0.0043 | 2384 |
| Oxr1          | oxidation resistance 1                                          | 1418502_a_at | -1.28 | 0.0021 | 2385 |
| Sart3         | squamous cell carcinoma antigen recognized by T-cells 3         | 1417548_at   | 1.28  | 0.0162 | 2386 |
| Hook2         | hook homolog 2 (Drosophila)                                     | 1419350_at   | -1.28 | 0.0172 | 2387 |
| Tmem109       | transmembrane protein 109                                       | 1416033_at   | -1.28 | 0.0077 | 2388 |
| 2610524H06Rik | RIKEN cDNA 2610524H06 gene                                      | 1429244_at   | 1.28  | 0.0072 | 2389 |
| Elf1          | E74-like factor 1                                               | 1417540_at   | 1.28  | 0.0407 | 2390 |
| Pbx2          | pre B-cell leukemia transcription factor 2                      | 1449261_at   | -1.28 | 0.0232 | 2391 |
| Tmem198       | transmembrane protein 198                                       | 1455192_at   | 1.28  | 0.0110 | 2392 |
| 1458203_at    |                                                                 | 1458203_at   | 1.28  | 0.0097 | 2393 |
| Slc40a1       | solute carrier family 40 (iron-regulated transporter), member 1 | 1417061_at   | -1.28 | 0.0452 | 2394 |
| Arhgef12      | Rho guanine nucleotide exchange factor (GEF) 12                 | 1453853_a_at | 1.28  | 0.0476 | 2395 |
| Kcnip1        | Kv channel-interacting protein 1                                | 1448459_at   | 1.28  | 0.0129 | 2396 |
| Larp4         | La ribonucleoprotein domain family, member 4                    | 1437177_at   | 1.28  | 0.0112 | 2397 |
| Camk2d        | calcium/calmodulin-dependent protein kinase II, delta           | 1459457_at   | -1.28 | 0.0229 | 2398 |
| Usp53         | ubiquitin specific peptidase 53                                 | 1452385_at   | 1.28  | 0.0148 | 2399 |
| Osbpl1a       | oxysterol binding protein-like 1A                               | 1460192_at   | -1.28 | 0.0240 | 2400 |
| Ctsk          | cathepsin K                                                     | 1450652_at   | 1.28  | 0.0057 | 2401 |

|               |                                                                     |              |       |          |      |
|---------------|---------------------------------------------------------------------|--------------|-------|----------|------|
| Fam184a       | family with sequence similarity 184, member A                       | 1430066_at   | -1.28 | 0.0073   | 2402 |
| Klhl1         | kelch-like 1 (Drosophila)                                           | 1449241_at   | 1.28  | 0.0034   | 2403 |
| Lrrc8a        | leucine rich repeat containing 8A                                   | 1434694_at   | 1.28  | 0.0217   | 2404 |
| Brd9          | bromodomain containing 9                                            | 1456018_at   | -1.28 | 5.30E-05 | 2405 |
| 1445255_at    |                                                                     | 1445255_at   | -1.28 | 0.0013   | 2406 |
| 1455117_at    |                                                                     | 1455117_at   | -1.28 | 0.0090   | 2407 |
| Ephb2         | Eph receptor B2                                                     | 1425016_at   | -1.28 | 0.0304   | 2408 |
| Dgkk          | diacylglycerol kinase kappa                                         | 1442865_at   | 1.28  | 0.0094   | 2409 |
| Sipa1l2       | signal-induced proliferation-associated 1 like 2                    | 1434261_at   | -1.28 | 0.0477   | 2410 |
| 1453541_at    |                                                                     | 1453541_at   | 1.28  | 0.0015   | 2411 |
| Dnaja4        | DnaJ (Hsp40) homolog, subfamily A, member 4                         | 1418592_at   | 1.28  | 0.0071   | 2412 |
| 1435274_at    |                                                                     | 1435274_at   | 1.28  | 0.0162   | 2413 |
| Casz1         | castor homolog 1, zinc finger (Drosophila)                          | 1459054_at   | 1.28  | 0.0410   | 2414 |
| Nlk           | nemo like kinase                                                    | 1419112_at   | 1.28  | 0.0342   | 2415 |
| 5430434G16Rik | RIKEN cDNA 5430434G16 gene                                          | 1432850_at   | -1.28 | 0.0482   | 2416 |
| Sphkap        | SPHK1 interactor, AKAP domain containing                            | 1431069_at   | -1.28 | 0.0023   | 2417 |
| Mm.385263     |                                                                     | 1449625_at   | 1.28  | 0.0099   | 2418 |
| Ckap4         | cytoskeleton-associated protein 4                                   | 1426754_x_at | 1.28  | 0.0058   | 2419 |
| Kcna3         | potassium voltage-gated channel, shaker-related subfamily, member 3 | 1456064_at   | -1.28 | 0.0076   | 2420 |
| Tshz1         | teashirt zinc finger family member 1                                | 1427233_at   | 1.28  | 0.0223   | 2421 |
| Cyb561        | cytochrome b-561                                                    | 1417507_at   | -1.28 | 0.0049   | 2422 |
| Smg5          | Smg-5 homolog, nonsense mediated mRNA decay factor (C. elegans)     | 1451797_at   | 1.28  | 0.0233   | 2423 |
| Ermp1         | endoplasmic reticulum metalloproteinase 1                           | 1433702_at   | -1.28 | 0.0106   | 2424 |
| Agap1         | ArfGAP with GTPase domain, ankyrin repeat and PH domain 1           | 1435433_at   | -1.28 | 0.0047   | 2425 |
| Atp2c1        | ATPase, Ca <sup>++</sup> -sequestering                              | 1431196_at   | -1.28 | 0.0110   | 2426 |
| Pygl          | liver glycogen phosphorylase                                        | 1417741_at   | -1.28 | 0.0065   | 2427 |
| Grin3a        | glutamate receptor ionotropic, NMDA3A                               | 1436575_at   | -1.28 | 0.0320   | 2428 |

|               |                                                                 |              |       |        |      |
|---------------|-----------------------------------------------------------------|--------------|-------|--------|------|
| Gsr           | glutathione reductase                                           | 1421817_at   | 1.28  | 0.0036 | 2429 |
| Panx1         | pannexin 1                                                      | 1458653_at   | 1.28  | 0.0472 | 2430 |
| Pcmt1         | protein-L-isoaspartate (D-aspartate) O-methyltransferase 1      | 1456604_a_at | 1.28  | 0.0051 | 2431 |
| Cacnb3        | calcium channel, voltage-dependent, beta 3 subunit              | 1448656_at   | 1.28  | 0.0001 | 2432 |
| Lpp           | LIM domain containing preferred translocation partner in lipoma | 1436714_at   | -1.28 | 0.0060 | 2433 |
| Dhx29         | DEAH (Asp-Glu-Ala-His) box polypeptide 29                       | 1439076_at   | 1.28  | 0.0023 | 2434 |
| C630043F03Rik | RIKEN cDNA C630043F03 gene                                      | 1455542_at   | -1.28 | 0.0132 | 2435 |
| Dhdpsl        | dihydrodipicolinate synthase-like, mitochondrial                | 1450098_at   | -1.28 | 0.0006 | 2436 |
| Mm.98300      |                                                                 | 1446216_at   | 1.28  | 0.0005 | 2437 |
| 1432064_at    |                                                                 | 1432064_at   | 1.28  | 0.0027 | 2438 |
| Kcnn1         | potassium intermediate/small conductance calcium-activated char | 1449536_at   | 1.28  | 0.0027 | 2439 |
| Sertad2       | SERTA domain containing 2                                       | 1444645_at   | 1.28  | 0.0304 | 2440 |
| Tmem44        | transmembrane protein 44                                        | 1456517_at   | -1.28 | 0.0037 | 2441 |
| Msrb2         | methionine sulfoxide reductase B2                               | 1424433_at   | -1.28 | 0.0016 | 2442 |
| Oxr1          | oxidation resistance 1                                          | 1418501_a_at | -1.28 | 0.0025 | 2443 |
| Kifc2         | kinesin family member C2                                        | 1421312_a_at | -1.28 | 0.0179 | 2444 |
| Stx6          | syntaxin 6                                                      | 1450844_at   | 1.28  | 0.0029 | 2445 |
| Prrx1         | paired related homeobox 1                                       | 1439774_at   | 1.28  | 0.0107 | 2446 |
| Ptpdc1        | protein tyrosine phosphatase domain containing 1                | 1437613_s_at | 1.28  | 0.0275 | 2447 |
| Igsf1         | immunoglobulin superfamily, member 1                            | 1438589_at   | -1.28 | 0.0077 | 2448 |
| Fam148c       | family with sequence similarity 148, member C                   | 1443344_at   | -1.28 | 0.0314 | 2449 |
| Slc39a10      | solute carrier family 39 (zinc transporter), member 10          | 1433751_at   | 1.28  | 0.0078 | 2450 |
| Emb           | embigin                                                         | 1415856_at   | 1.28  | 0.0071 | 2451 |
| Cebpg         | CCAAT/enhancer binding protein (C/EBP), gamma                   | 1451639_at   | 1.28  | 0.0045 | 2452 |
| Bzw2          | basic leucine zipper and W2 domains 2                           | 1423456_at   | -1.28 | 0.0016 | 2453 |
| Mmp15         | matrix metalloproteinase 15                                     | 1437462_x_at | -1.28 | 0.0116 | 2454 |
| 1458351_s_at  |                                                                 | 1458351_s_at | 1.28  | 0.0033 | 2455 |

|               |                                                                     |              |       |        |      |
|---------------|---------------------------------------------------------------------|--------------|-------|--------|------|
| Sbf1          | SET binding factor 1                                                | 1434707_at   | 1.28  | 0.0022 | 2456 |
| 1438134_at    |                                                                     | 1438134_at   | -1.28 | 0.0278 | 2457 |
| Ncoa3         | nuclear receptor coactivator 3                                      | 1422737_at   | 1.28  | 0.0376 | 2458 |
| Igdcc4        | immunoglobulin superfamily, DCC subclass, member 4                  | 1416473_a_at | -1.28 | 0.0245 | 2459 |
| 1420501_at    |                                                                     | 1420501_at   | 1.28  | 0.0011 | 2460 |
| Xkr6          | X Kell blood group precursor related family member 6 homolog        | 1425928_at   | 1.28  | 0.0097 | 2461 |
| Gm13111       | predicted gene 13111                                                | 1457215_at   | -1.28 | 0.0292 | 2462 |
| Tmco5         | transmembrane and coiled-coil domains 5                             | 1420341_at   | -1.28 | 0.0198 | 2463 |
| BG075374      |                                                                     | 1446012_at   | -1.28 | 0.0497 | 2464 |
| Stx6          | syntaxin 6                                                          | 1431646_a_at | 1.28  | 0.0252 | 2465 |
| Gfra1         | glial cell line derived neurotrophic factor family receptor alpha 1 | 1421973_at   | -1.28 | 0.0064 | 2466 |
| 2900001G08Rik | RIKEN cDNA 2900001G08 gene                                          | 1430642_at   | -1.28 | 0.0366 | 2467 |
| 1457332_at    |                                                                     | 1457332_at   | -1.28 | 0.0062 | 2468 |
| Raph1         | Ras association (RalGDS/AF-6) and pleckstrin homology domains       | 1456918_at   | 1.28  | 0.0085 | 2469 |
| Reln          | reelin                                                              | 1449465_at   | 1.28  | 0.0002 | 2470 |
| Cdh2          | cadherin 2                                                          | 1418815_at   | -1.28 | 0.0001 | 2471 |
| Ssr1          | signal sequence receptor, alpha                                     | 1417763_at   | 1.28  | 0.0268 | 2472 |
| 1453079_at    |                                                                     | 1453079_at   | -1.28 | 0.0057 | 2473 |
| Zfp365        | zinc finger protein 365                                             | 1433583_at   | -1.28 | 0.0004 | 2474 |
| Arfgap1       | ADP-ribosylation factor GTPase activating protein 1                 | 1427245_at   | 1.28  | 0.0060 | 2475 |
| Fam129a       | family with sequence similarity 129, member A                       | 1422567_at   | 1.28  | 0.0127 | 2476 |
| Zfp229        | zinc finger protein                                                 | 1438349_at   | -1.28 | 0.0017 | 2477 |
| 1457264_at    |                                                                     | 1457264_at   | 1.28  | 0.0441 | 2478 |
| Coro2b        | coronin, actin binding protein, 2B                                  | 1434326_x_at | -1.28 | 0.0003 | 2479 |
| Pts           | 6-pyruvoyl-tetrahydropterin synthase                                | 1450660_at   | -1.28 | 0.0007 | 2480 |
| Pmaip1        | phorbol-12-myristate-13-acetate-induced protein 1                   | 1418203_at   | 1.28  | 0.0382 | 2481 |
| Akr1c18       | aldo-keto reductase family 1, member C18                            | 1419136_at   | 1.27  | 0.0038 | 2482 |

|               |                                                                |              |       |        |      |
|---------------|----------------------------------------------------------------|--------------|-------|--------|------|
| 1449001_at    |                                                                | 1449001_at   | -1.27 | 0.0404 | 2483 |
| Pard6b        | par-6 (partitioning defective 6) homolog beta (C. elegans)     | 1423174_a_at | 1.27  | 0.0152 | 2484 |
| 4933415E08Rik | RIKEN cDNA 4933415E08 gene                                     | 1459920_at   | -1.27 | 0.0123 | 2485 |
| Cadm1         | cell adhesion molecule 1                                       | 1417377_at   | -1.27 | 0.0090 | 2486 |
| Gabrg1        | gamma-aminobutyric acid (GABA) A receptor, subunit gamma 1     | 1460408_at   | -1.27 | 0.0262 | 2487 |
| Tlcd2         | TLC domain containing 2                                        | 1432282_a_at | 1.27  | 0.0018 | 2488 |
| Scnn1a        | sodium channel, nonvoltage-gated 1 alpha                       | 1425088_at   | -1.27 | 0.0272 | 2489 |
| Timp3         | tissue inhibitor of metalloproteinase 3                        | 1419089_at   | 1.27  | 0.0279 | 2490 |
| Rims4         | regulating synaptic membrane exocytosis 4                      | 1456926_at   | 1.27  | 0.0053 | 2491 |
| 1442386_at    |                                                                | 1442386_at   | -1.27 | 0.0345 | 2492 |
| Kcnd2         | potassium voltage-gated channel, Shal-related family, member 2 | 1459288_at   | -1.27 | 0.0389 | 2493 |
| L3mbtl3       | l(3)mbt-like 3 (Drosophila)                                    | 1434246_at   | 1.27  | 0.0198 | 2494 |
| Rps6ka4       | ribosomal protein S6 kinase, polypeptide 4                     | 1448498_at   | -1.27 | 0.0072 | 2495 |
| Mm.441936     |                                                                | 1453780_at   | 1.27  | 0.0240 | 2496 |
| C530008M17Rik | RIKEN cDNA C530008M17 gene                                     | 1434645_at   | -1.27 | 0.0363 | 2497 |
| 2010109N14Rik | RIKEN cDNA 2010109N14 gene                                     | 1447896_s_at | -1.27 | 0.0095 | 2498 |
| Larp4         | La ribonucleoprotein domain family, member 4                   | 1455102_at   | 1.27  | 0.0315 | 2499 |
| 1430969_at    |                                                                | 1430969_at   | -1.27 | 0.0286 | 2500 |
| Mm.384161     |                                                                | 1444914_at   | -1.27 | 0.0023 | 2501 |
| Minpp1        | multiple inositol polyphosphate histidine phosphatase 1        | 1423265_at   | -1.27 | 0.0099 | 2502 |
| Mras          | muscle and microspikes RAS                                     | 1449590_a_at | 1.27  | 0.0283 | 2503 |
| 1442302_at    |                                                                | 1442302_at   | -1.27 | 0.0116 | 2504 |
| Mettl6        | methyltransferase like 6                                       | 1432384_a_at | 1.27  | 0.0004 | 2505 |
| Smad1         | MAD homolog 1 (Drosophila)                                     | 1416081_at   | 1.27  | 0.0251 | 2506 |
| Vat1          | vesicle amine transport protein 1 homolog (T californica)      | 1441930_x_at | 1.27  | 0.0203 | 2507 |
| Dlx6os1       | Dlx6 opposite strand transcript 1                              | 1438799_at   | 1.27  | 0.0196 | 2508 |
| Ryr3          | ryanodine receptor 3                                           | 1452533_at   | -1.27 | 0.0265 | 2509 |

|               |                                                                   |              |       |          |      |
|---------------|-------------------------------------------------------------------|--------------|-------|----------|------|
| Mm.386266     |                                                                   | 1445564_at   | 1.27  | 0.0034   | 2510 |
| A530047J11Rik | RIKEN cDNA A530047J11 gene                                        | 1440884_s_at | -1.27 | 0.0127   | 2511 |
| Rreb1         | ras responsive element binding protein 1                          | 1434741_at   | -1.27 | 0.0277   | 2512 |
| D11Bwg0517e   | DNA segment, Chr 11, Brigham & Women's Genetics 0517 expressed    | 1456149_at   | 1.27  | 0.0257   | 2513 |
| Ttc39c        | tetratricopeptide repeat domain 39C                               | 1426223_at   | -1.27 | 0.0011   | 2514 |
| Pip5k1c       | phosphatidylinositol-4-phosphate 5-kinase, type 1 gamma           | 1424954_a_at | 1.27  | 0.0079   | 2515 |
| 1452723_at    |                                                                   | 1452723_at   | 1.27  | 0.0413   | 2516 |
| Fam49a        | family with sequence similarity 49, member A                      | 1454806_at   | -1.27 | 0.0003   | 2517 |
| Rgs3          | regulator of G-protein signaling 3                                | 1425296_a_at | 1.27  | 0.0066   | 2518 |
| YdjC          | YdjC homolog (bacterial)                                          | 1428550_at   | -1.27 | 6.50E-05 | 2519 |
| Tmem63c       | transmembrane protein 63c                                         | 1456184_at   | 1.27  | 0.0196   | 2520 |
| Nxn           | nucleoredoxin                                                     | 1422465_a_at | 1.27  | 0.0004   | 2521 |
| Adam23        | a disintegrin and metallopeptidase domain 23                      | 1447946_at   | 1.27  | 0.0040   | 2522 |
| BE370605      |                                                                   | 1453141_at   | -1.27 | 0.0090   | 2523 |
| Syn2          | synapsin II                                                       | 1449030_at   | 1.27  | 0.0309   | 2524 |
| 1422695_at    |                                                                   | 1422695_at   | 1.27  | 0.0060   | 2525 |
| Galnt7        | UDP-N-acetyl-alpha-D-galactosamine: polypeptide N-acetylgalact    | 1426908_at   | 1.27  | 0.0020   | 2526 |
| Raph1         | Ras association (RalGDS/AF-6) and pleckstrin homology domains     | 1434303_at   | 1.27  | 0.0011   | 2527 |
| 1429434_at    |                                                                   | 1429434_at   | 1.27  | 0.0143   | 2528 |
| Tmeff2        | transmembrane protein with EGF-like and two follistatin-like doma | 1441598_at   | 1.27  | 0.0259   | 2529 |
| Rin1          | Ras and Rab interactor 1                                          | 1437460_x_at | -1.27 | 0.0026   | 2530 |
| 1446117_at    |                                                                   | 1446117_at   | 1.27  | 0.0253   | 2531 |
| Med14         | mediator complex subunit 14                                       | 1456785_at   | 1.27  | 0.0359   | 2532 |
| Pgcp          | plasma glutamate carboxypeptidase                                 | 1416441_at   | 1.27  | 0.0076   | 2533 |
| 1446366_at    |                                                                   | 1446366_at   | -1.27 | 0.0023   | 2534 |
| Map1lc3a      | microtubule-associated protein 1 light chain 3 alpha              | 1451290_at   | 1.27  | 0.0307   | 2535 |
| 8430406P12Rik | RIKEN cDNA 8430406P12 gene                                        | 1430506_at   | 1.27  | 0.0129   | 2536 |

|            |                                                                    |              |       |          |      |
|------------|--------------------------------------------------------------------|--------------|-------|----------|------|
| Mm.470998  |                                                                    | 1447937_a_at | -1.27 | 0.0281   | 2537 |
| Nsbp1      | nucleosome binding protein 1                                       | 1418152_at   | -1.27 | 0.0077   | 2538 |
| Slc24a3    | solute carrier family 24 (sodium/potassium/calcium exchanger), mem | 1442184_at   | -1.27 | 0.0432   | 2539 |
| 1455444_at |                                                                    | 1455444_at   | -1.27 | 0.0390   | 2540 |
| 1434530_at |                                                                    | 1434530_at   | 1.27  | 0.0063   | 2541 |
| Rps6kl1    | ribosomal protein S6 kinase-like 1                                 | 1426466_s_at | 1.27  | 0.0023   | 2542 |
| 1439168_at |                                                                    | 1439168_at   | -1.27 | 0.0159   | 2543 |
| Otud7a     | OTU domain containing 7A                                           | 1438286_at   | 1.27  | 0.0042   | 2544 |
| Dhx33      | DEAH (Asp-Glu-Ala-His) box polypeptide 33                          | 1429191_at   | -1.27 | 0.0300   | 2545 |
| Cald1      | caldesmon 1                                                        | 1458057_at   | -1.27 | 0.0453   | 2546 |
| Psmg2      | proteasome (prosome, macropain) assembly chaperone 2               | 1425373_a_at | -1.27 | 2.30E-05 | 2547 |
| Nedd4l     | neural precursor cell expressed, developmentally down-regulated g  | 1423269_a_at | -1.27 | 0.0044   | 2548 |
| Nek3       | NIMA (never in mitosis gene a)-related expressed kinase 3          | 1418947_at   | -1.27 | 0.0266   | 2549 |
| Gas1       | growth arrest specific 1                                           | 1448494_at   | -1.27 | 0.0062   | 2550 |
| Ankrd32    | ankyrin repeat domain 32                                           | 1423577_at   | 1.27  | 0.0042   | 2551 |
| Pfkl       | phosphofructokinase, liver, B-type                                 | 1450269_a_at | 1.27  | 0.0367   | 2552 |
| 1439638_at |                                                                    | 1439638_at   | 1.27  | 0.0201   | 2553 |
| Phf16      | PHD finger protein 16                                              | 1455185_s_at | 1.27  | 0.0422   | 2554 |
| Ptpn12     | protein tyrosine phosphatase, non-receptor type 12                 | 1455105_at   | 1.27  | 0.0465   | 2555 |
| Uhrf2      | ubiquitin-like, containing PHD and RING finger domains 2           | 1454920_at   | -1.27 | 0.0020   | 2556 |
| 1441192_at |                                                                    | 1441192_at   | -1.27 | 0.0050   | 2557 |
| Trp53bp1   | transformation related protein 53 binding protein 1                | 1442316_x_at | -1.27 | 0.0125   | 2558 |
| Cldn12     | claudin 12                                                         | 1433782_at   | 1.27  | 0.0086   | 2559 |
| Phf2011    | PHD finger protein 20-like 1                                       | 1454939_at   | 1.27  | 0.0045   | 2560 |
| Papola     | poly (A) polymerase alpha                                          | 1424217_at   | 1.27  | 0.0332   | 2561 |
| Slit1      | slit homolog 1 (Drosophila)                                        | 1425277_at   | -1.27 | 0.0331   | 2562 |
| Mbnl2      | muscleblind-like 2                                                 | 1436858_at   | 1.27  | 0.0051   | 2563 |

|               |                                                                          |              |       |          |      |
|---------------|--------------------------------------------------------------------------|--------------|-------|----------|------|
| Gm11992       | predicted gene 11992                                                     | 1455973_at   | -1.27 | 0.0018   | 2564 |
| Prim1         | DNA primase, p49 subunit                                                 | 1449061_a_at | -1.27 | 0.0441   | 2565 |
| Zfp697        | zinc finger protein 697                                                  | 1440999_at   | -1.27 | 0.0006   | 2566 |
| 1426683_at    |                                                                          | 1426683_at   | 1.27  | 0.0009   | 2567 |
| Fam155a       | family with sequence similarity 155, member A                            | 1435138_at   | 1.27  | 0.0046   | 2568 |
| BB754142      |                                                                          | 1434497_at   | -1.27 | 0.0130   | 2569 |
| 3110039M20Rik | RIKEN cDNA 3110039M20 gene                                               | 1440204_at   | -1.27 | 0.0009   | 2570 |
| Fgl2          | fibrinogen-like protein 2                                                | 1421854_at   | 1.27  | 0.0117   | 2571 |
| 1435008_at    |                                                                          | 1435008_at   | 1.27  | 0.0009   | 2572 |
| Sfxn1         | sideroflexin 1                                                           | 1417559_at   | -1.27 | 2.60E-08 | 2573 |
| 1453482_at    |                                                                          | 1453482_at   | 1.27  | 0.0209   | 2574 |
| Mm.362218     |                                                                          | 1447302_at   | -1.27 | 0.0034   | 2575 |
| Cyr61         | cysteine rich protein 61                                                 | 1442340_x_at | 1.27  | 0.0449   | 2576 |
| Sh3gl2        | SH3-domain GRB2-like 2                                                   | 1418792_at   | 1.27  | 0.0104   | 2577 |
| Csf1          | colony stimulating factor 1 (macrophage)                                 | 1448914_a_at | -1.27 | 0.0064   | 2578 |
| Rhoq          | ras homolog gene family, member Q                                        | 1440925_at   | 1.27  | 0.0376   | 2579 |
| Usp27x        | ubiquitin specific peptidase 27, X chromosome                            | 1427606_at   | 1.27  | 0.0049   | 2580 |
| 6330416G13Rik | RIKEN cDNA 6330416G13 gene                                               | 1452015_at   | 1.27  | 0.0153   | 2581 |
| Ptprz1        | protein tyrosine phosphatase, receptor type Z, polypeptide 1             | 1427019_at   | -1.27 | 0.0018   | 2582 |
| Cux1          | cut-like homeobox 1                                                      | 1434683_at   | 1.27  | 0.0036   | 2583 |
| Acbd4         | acyl-Coenzyme A binding domain containing 4                              | 1449626_s_at | -1.27 | 0.0021   | 2584 |
| Ptprz1        | protein tyrosine phosphatase, receptor type Z, polypeptide 1             | 1452284_at   | -1.27 | 0.0005   | 2585 |
| Trmt2b        | TRM2 tRNA methyltransferase 2 homolog B (S. cerevisiae)                  | 1433672_at   | -1.26 | 0.0038   | 2586 |
| Snx6          | sorting nexin 6                                                          | 1451602_at   | 1.26  | 0.0120   | 2587 |
| Bcas3         | breast carcinoma amplified sequence 3                                    | 1428454_at   | -1.26 | 0.0289   | 2588 |
| Atp1b2        | ATPase, Na <sup>+</sup> /K <sup>+</sup> transporting, beta 2 polypeptide | 1435148_at   | 1.26  | 0.0066   | 2589 |
| Cd99          | CD99 antigen                                                             | 1430514_a_at | 1.26  | 0.0168   | 2590 |



|               |                                                                  |              |       |          |      |
|---------------|------------------------------------------------------------------|--------------|-------|----------|------|
| Ldlrad3       | low density lipoprotein receptor class A domain containing 3     | 1438666_at   | -1.26 | 0.0049   | 2591 |
| 1435700_at    |                                                                  | 1435700_at   | -1.26 | 0.0488   | 2592 |
| C330027C09Rik | RIKEN cDNA C330027C09 gene                                       | 1449699_s_at | 1.26  | 0.0024   | 2593 |
| Notch3        | Notch gene homolog 3 (Drosophila)                                | 1421965_s_at | 1.26  | 0.0266   | 2594 |
| Phf20I1       | PHD finger protein 20-like 1                                     | 1418960_at   | 1.26  | 0.0013   | 2595 |
| Pard3b        | par-3 partitioning defective 3 homolog B (C. elegans)            | 1427169_at   | -1.26 | 0.0260   | 2596 |
| Atp11c        | ATPase, class VI, type 11C                                       | 1452496_at   | 1.26  | 0.0092   | 2597 |
| Ebpl          | emopamil binding protein-like                                    | 1417298_at   | -1.26 | 0.0088   | 2598 |
| Cxcl16        | chemokine (C-X-C motif) ligand 16                                | 1449195_s_at | 1.26  | 0.0435   | 2599 |
| Zfr           | zinc finger RNA binding protein                                  | 1449552_at   | 1.26  | 0.0003   | 2600 |
| Radil         | Ras association and DIL domains                                  | 1433523_at   | 1.26  | 0.0272   | 2601 |
| Rsph4a        | radial spoke head 4 homolog A (Chlamydomonas)                    | 1444270_at   | -1.26 | 0.0448   | 2602 |
| Tyrp1         | tyrosinase-related protein 1                                     | 1415861_at   | -1.26 | 0.0498   | 2603 |
| Kif22         | kinesin family member 22                                         | 1437716_x_at | 1.26  | 0.0004   | 2604 |
| Kcnmb4        | potassium large conductance calcium-activated channel, subfamily | 1449471_at   | -1.26 | 0.0002   | 2605 |
| Asphd1        | aspartate beta-hydroxylase domain containing 1                   | 1456837_at   | 1.26  | 0.0484   | 2606 |
| Mm.122693     |                                                                  | 1446587_at   | 1.26  | 0.0435   | 2607 |
| 1444012_at    |                                                                  | 1444012_at   | -1.26 | 0.0087   | 2608 |
| C030009O12Rik | RIKEN cDNA C030009O12 gene                                       | 1435095_at   | -1.26 | 0.0146   | 2609 |
| Flrt3         | fibronectin leucine rich transmembrane protein 3                 | 1453102_at   | -1.26 | 0.0359   | 2610 |
| 1446783_at    |                                                                  | 1446783_at   | -1.26 | 0.0291   | 2611 |
| Sfxn1         | sideroflexin 1                                                   | 1417560_at   | -1.26 | 2.90E-05 | 2612 |
| Evi2a         | ecotropic viral integration site 2a                              | 1450241_a_at | -1.26 | 0.0388   | 2613 |
| Kcnj12        | potassium inwardly-rectifying channel, subfamily J, member 12    | 1422871_at   | 1.26  | 0.0328   | 2614 |
| Mm.261670     |                                                                  | 1418366_at   | -1.26 | 0.0134   | 2615 |
| Slc35f2       | solute carrier family 35, member F2                              | 1429154_at   | -1.26 | 0.0071   | 2616 |
| Pex11c        | peroxisomal biogenesis factor 11 gamma                           | 1430856_at   | 1.26  | 0.0219   | 2617 |

|               |                                                            |              |       |          |      |
|---------------|------------------------------------------------------------|--------------|-------|----------|------|
| Mm.394279     |                                                            | 1430842_at   | -1.26 | 0.0181   | 2618 |
| Gabra1        | gamma-aminobutyric acid (GABA) A receptor, subunit alpha 1 | 1436889_at   | -1.26 | 0.0184   | 2619 |
| 1448426_at    |                                                            | 1448426_at   | 1.26  | 0.0041   | 2620 |
| Cnn2          | calponin 2                                                 | 1450981_at   | 1.26  | 0.0220   | 2621 |
| Fam118a       | family with sequence similarity 118, member A              | 1448678_at   | -1.26 | 0.0194   | 2622 |
| Mtap4         | microtubule-associated protein 4                           | 1416091_at   | -1.26 | 0.0035   | 2623 |
| Rnf152        | ring finger protein 152                                    | 1439887_at   | 1.26  | 0.0347   | 2624 |
| Ephb1         | Eph receptor B1                                            | 1455188_at   | 1.26  | 0.0097   | 2625 |
| Ggct          | gamma-glutamyl cyclotransferase                            | 1435695_a_at | -1.26 | 8.00E-06 | 2626 |
| Sfrs8         | splicing factor, arginine/serine-rich 8                    | 1434966_at   | -1.26 | 0.0137   | 2627 |
| Bcor          | BCL6 interacting corepressor                               | 1452910_at   | 1.26  | 0.0104   | 2628 |
| 4933439C10Rik | RIKEN cDNA 4933439C10 gene                                 | 1452696_a_at | -1.26 | 0.0087   | 2629 |
| 1447467_at    |                                                            | 1447467_at   | -1.26 | 0.0087   | 2630 |
| 1440804_at    |                                                            | 1440804_at   | 1.26  | 0.0448   | 2631 |
| Dleu2         | deleted in lymphocytic leukemia, 2                         | 1456145_at   | 1.26  | 0.0186   | 2632 |
| 1430871_at    |                                                            | 1430871_at   | 1.26  | 0.0417   | 2633 |
| Sccpdh        | saccharopine dehydrogenase (putative)                      | 1426510_at   | 1.26  | 0.0047   | 2634 |
| Ryr3          | ryanodine receptor 3                                       | 1427427_at   | -1.26 | 0.0223   | 2635 |
| Plcb1         | phospholipase C, beta 1                                    | 1425781_a_at | 1.26  | 0.0036   | 2636 |
| 1430152_at    |                                                            | 1430152_at   | -1.26 | 0.0230   | 2637 |
| Rangap1       | RAN GTPase activating protein 1                            | 1423749_s_at | 1.26  | 0.0065   | 2638 |
| Plch1         | phospholipase C, eta 1                                     | 1457157_at   | -1.26 | 0.0077   | 2639 |
| Cadm2         | cell adhesion molecule 2                                   | 1435145_at   | 1.26  | 0.0203   | 2640 |
| Rnh1          | ribonuclease/angiogenin inhibitor 1                        | 1451201_s_at | 1.26  | 0.0198   | 2641 |
| Fert2         | fer (fms/fps related) protein kinase, testis specific 2    | 1460080_at   | 1.26  | 0.0022   | 2642 |
| Nln           | neurolysin (metallopeptidase M3 family)                    | 1424981_at   | 1.26  | 0.0315   | 2643 |
| Plscr1        | phospholipid scramblase 1                                  | 1453181_x_at | 1.26  | 0.0146   | 2644 |

|               |                                                                    |              |       |        |      |
|---------------|--------------------------------------------------------------------|--------------|-------|--------|------|
| Cadm2         | cell adhesion molecule 2                                           | 1435146_s_at | 1.26  | 0.0263 | 2645 |
| Lrp1          | low density lipoprotein receptor-related protein 1                 | 1448655_at   | 1.26  | 0.0009 | 2646 |
| Igfbpl1       | insulin-like growth factor binding protein-like 1                  | 1423377_at   | 1.26  | 0.0237 | 2647 |
| Peli1         | pellino 1                                                          | 1417371_at   | -1.26 | 0.0150 | 2648 |
| Cyp4v3        | cytochrome P450, family 4, subfamily v, polypeptide 3              | 1417070_at   | 1.26  | 0.0180 | 2649 |
| 1445863_at    |                                                                    | 1445863_at   | -1.26 | 0.0336 | 2650 |
| Paplg         | poly(A) polymerase gamma                                           | 1446307_at   | 1.26  | 0.0298 | 2651 |
| 5730455O13Rik | RIKEN cDNA 5730455O13 gene                                         | 1429984_at   | -1.26 | 0.0014 | 2652 |
| BB036443      |                                                                    | 1439852_at   | 1.26  | 0.0082 | 2653 |
| Slc4a4        | solute carrier family 4 (anion exchanger), member 4                | 1434096_at   | -1.26 | 0.0012 | 2654 |
| Il6st         | interleukin 6 signal transducer                                    | 1452843_at   | 1.26  | 0.0105 | 2655 |
| Tm4sf1        | transmembrane 4 superfamily member 1                               | 1439925_at   | 1.26  | 0.0467 | 2656 |
| Lgi4          | leucine-rich repeat LGI family, member 4                           | 1434121_at   | 1.26  | 0.0442 | 2657 |
| Mkrn1         | makorin, ring finger protein, 1                                    | 1418435_at   | 1.26  | 0.0136 | 2658 |
| Kif17         | kinesin family member 17                                           | 1422762_at   | 1.26  | 0.0460 | 2659 |
| Umps          | uridine monophosphate synthetase                                   | 1455832_a_at | -1.26 | 0.0066 | 2660 |
| Mm.348409     |                                                                    | 1455518_at   | 1.26  | 0.0184 | 2661 |
| Baiap2        | brain-specific angiogenesis inhibitor 1-associated protein 2       | 1451028_at   | 1.26  | 0.0085 | 2662 |
| Atf6b         | activating transcription factor 6 beta                             | 1417173_at   | -1.26 | 0.0002 | 2663 |
| Lama3         | laminin, alpha 3                                                   | 1427512_a_at | -1.26 | 0.0051 | 2664 |
| Mm.441429     |                                                                    | 1440203_at   | 1.26  | 0.0023 | 2665 |
| Snca          | synuclein, alpha                                                   | 1418493_a_at | -1.26 | 0.0134 | 2666 |
| Tlr4          | toll-like receptor 4                                               | 1418162_at   | 1.26  | 0.0498 | 2667 |
| Chd1          | chromodomain helicase DNA binding protein 1                        | 1420990_at   | 1.26  | 0.0225 | 2668 |
| Stap2         | signal transducing adaptor family member 2                         | 1451261_s_at | 1.26  | 0.0047 | 2669 |
| BE993759      |                                                                    | 1445668_at   | 1.26  | 0.0133 | 2670 |
| Elovl1        | elongation of very long chain fatty acids (FEN1/Elo2, SUR4/Elo3, y | 1455994_x_at | 1.26  | 0.0196 | 2671 |

|               |                                                                     |              |       |          |      |
|---------------|---------------------------------------------------------------------|--------------|-------|----------|------|
| Flnb          | filamin, beta                                                       | 1426750_at   | 1.26  | 0.0146   | 2672 |
| 2310058N22Rik | RIKEN cDNA 2310058N22 gene                                          | 1429215_at   | -1.26 | 0.0014   | 2673 |
| 1420543_at    |                                                                     | 1420543_at   | -1.26 | 0.0259   | 2674 |
| Nlk           | nemo like kinase                                                    | 1435970_at   | 1.26  | 0.0425   | 2675 |
| Rock2         | Rho-associated coiled-coil containing protein kinase 2              | 1451041_at   | 1.26  | 0.0120   | 2676 |
| Peg3          | paternally expressed 3                                              | 1417355_at   | 1.26  | 0.0452   | 2677 |
| 9330121K16Rik | RIKEN cDNA 9330121K16 gene                                          | 1439701_at   | -1.26 | 9.90E-05 | 2678 |
| Rrm2b         | ribonucleotide reductase M2 B (TP53 inducible)                      | 1433773_at   | -1.26 | 0.0120   | 2679 |
| Mmgt2         | membrane magnesium transporter 2                                    | 1451583_a_at | 1.26  | 0.0021   | 2680 |
| Ccdc101       | coiled-coil domain containing 101                                   | 1451167_at   | 1.26  | 0.0028   | 2681 |
| Klf6          | Kruppel-like factor 6                                               | 1447448_s_at | 1.26  | 0.0005   | 2682 |
| Plcx2         | phosphatidylinositol-specific phospholipase C, X domain containing  | 1435462_at   | 1.26  | 0.0197   | 2683 |
| Ankrd32       | ankyrin repeat domain 32                                            | 1430047_at   | 1.26  | 0.0042   | 2684 |
| 1455660_at    |                                                                     | 1455660_at   | 1.26  | 0.0018   | 2685 |
| Lipa          | lysosomal acid lipase A                                             | 1423140_at   | 1.26  | 0.0245   | 2686 |
| Pdzd2         | PDZ domain containing 2                                             | 1443618_at   | 1.26  | 0.0409   | 2687 |
| Foxn3         | forkhead box N3                                                     | 1434002_at   | -1.26 | 0.0001   | 2688 |
| 1440776_at    |                                                                     | 1440776_at   | -1.26 | 0.0255   | 2689 |
| 1435893_at    |                                                                     | 1435893_at   | -1.26 | 0.0213   | 2690 |
| Nfatc2        | nuclear factor of activated T-cells, cytoplasmic, calcineurin-depen | 1426032_at   | 1.26  | 0.0366   | 2691 |
| Pla1a         | phospholipase A1 member A                                           | 1417785_at   | 1.26  | 0.0224   | 2692 |
| Tmem158       | transmembrane protein 158                                           | 1452652_at   | 1.26  | 0.0071   | 2693 |
| Sept9         | septin 9                                                            | 1417038_at   | -1.26 | 0.0221   | 2694 |
| Coro2b        | coronin, actin binding protein, 2B                                  | 1434755_at   | -1.26 | 0.0002   | 2695 |
| H3f3b         | H3 histone, family 3B                                               | 1455725_a_at | 1.26  | 0.0152   | 2696 |
| Tgfa          | transforming growth factor alpha                                    | 1421942_s_at | -1.26 | 0.0113   | 2697 |
| D830016K09Rik | RIKEN cDNA D830016K09 gene                                          | 1446559_at   | -1.26 | 0.0078   | 2698 |

|               |                                                          |              |       |          |      |
|---------------|----------------------------------------------------------|--------------|-------|----------|------|
| Nat13         | N-acetyltransferase 13                                   | 1428970_at   | 1.26  | 0.0035   | 2699 |
| Rhobtb1       | Rho-related BTB domain containing 1                      | 1429206_at   | 1.26  | 0.0050   | 2700 |
| Ramp1         | receptor (calcitonin) activity modifying protein 1       | 1417481_at   | -1.26 | 0.0138   | 2701 |
| Det1          | de-etiolated homolog 1 (Arabidopsis)                     | 1429218_at   | -1.26 | 0.0352   | 2702 |
| Arl13a        | ADP-ribosylation factor-like 13A                         | 1431945_at   | 1.26  | 0.0032   | 2703 |
| 1417356_at    |                                                          | 1417356_at   | 1.26  | 0.0104   | 2704 |
| Nr2c1         | nuclear receptor subfamily 2, group C, member 1          | 1418605_at   | 1.26  | 7.00E-05 | 2705 |
| Nr3c2         | nuclear receptor subfamily 3, group C, member 2          | 1445092_at   | -1.26 | 0.0182   | 2706 |
| Rgs19         | regulator of G-protein signaling 19                      | 1434940_x_at | -1.26 | 0.0438   | 2707 |
| A830080D01Rik | RIKEN cDNA A830080D01 gene                               | 1434910_at   | 1.26  | 0.0047   | 2708 |
| 1437753_at    |                                                          | 1437753_at   | 1.26  | 0.0062   | 2709 |
| Il6ra         | interleukin 6 receptor, alpha                            | 1452416_at   | -1.26 | 0.0115   | 2710 |
| 1439215_at    |                                                          | 1439215_at   | -1.25 | 0.0105   | 2711 |
| E130308A19Rik | RIKEN cDNA E130308A19 gene                               | 1455613_at   | -1.25 | 0.0051   | 2712 |
| Tbc1d15       | TBC1 domain family, member 15                            | 1416061_at   | 1.25  | 0.0049   | 2713 |
| Cadm2         | cell adhesion molecule 2                                 | 1435147_x_at | 1.25  | 0.0022   | 2714 |
| 1455784_at    |                                                          | 1455784_at   | -1.25 | 0.0094   | 2715 |
| Fam171b       | family with sequence similarity 171, member B            | 1436350_at   | -1.25 | 0.0004   | 2716 |
| 1441305_at    |                                                          | 1441305_at   | -1.25 | 0.0080   | 2717 |
| Uhrf2         | ubiquitin-like, containing PHD and RING finger domains 2 | 1447217_at   | -1.25 | 0.0372   | 2718 |
| N28178        | expressed sequence N28178                                | 1445465_at   | -1.25 | 0.0295   | 2719 |
| Atp11c        | ATPase, class VI, type 11C                               | 1443003_at   | 1.25  | 0.0407   | 2720 |
| Ptp4a1        | protein tyrosine phosphatase 4a1                         | 1419024_at   | 1.25  | 0.0219   | 2721 |
| Mm.370846     |                                                          | 1457490_at   | -1.25 | 0.0316   | 2722 |
| 1440998_at    |                                                          | 1440998_at   | 1.25  | 0.0126   | 2723 |
| Fam110b       | family with sequence similarity 110, member B            | 1437150_at   | -1.25 | 0.0001   | 2724 |
| Slc38a3       | solute carrier family 38, member 3                       | 1418706_at   | 1.25  | 0.0130   | 2725 |

|               |                                                                      |              |       |        |      |
|---------------|----------------------------------------------------------------------|--------------|-------|--------|------|
| Scn9a         | sodium channel, voltage-gated, type IX, alpha                        | 1457819_at   | -1.25 | 0.0390 | 2726 |
| Bmpr2         | bone morphogenic protein receptor, type II (serine/threonine kinas   | 1419616_at   | 1.25  | 0.0442 | 2727 |
| Ctsb          | cathepsin B                                                          | 1417490_at   | 1.25  | 0.0208 | 2728 |
| Fbn1          | fibrillin 1                                                          | 1425896_a_at | -1.25 | 0.0131 | 2729 |
| Mlec          | malectin                                                             | 1436509_at   | 1.25  | 0.0234 | 2730 |
| Ube2h         | ubiquitin-conjugating enzyme E2H                                     | 1418631_at   | 1.25  | 0.0060 | 2731 |
| Gfra2         | glial cell line derived neurotrophic factor family receptor alpha 2  | 1425579_at   | -1.25 | 0.0002 | 2732 |
| Pik3r3        | phosphatidylinositol 3 kinase, regulatory subunit, polypeptide 3 (p5 | 1456482_at   | 1.25  | 0.0124 | 2733 |
| Dtna          | dystrobrevin alpha                                                   | 1419223_a_at | 1.25  | 0.0093 | 2734 |
| Cttn          | cortactin                                                            | 1433908_a_at | -1.25 | 0.0027 | 2735 |
| Gsn           | gelsolin                                                             | 1456569_x_at | 1.25  | 0.0303 | 2736 |
| Rasd2         | RASD family, member 2                                                | 1458433_at   | 1.25  | 0.0248 | 2737 |
| 1434884_at    |                                                                      | 1434884_at   | 1.25  | 0.0152 | 2738 |
| Syng3         | synaptogyrin 3                                                       | 1416098_at   | -1.25 | 0.0018 | 2739 |
| Dapk1         | death associated protein kinase 1                                    | 1426915_at   | -1.25 | 0.0124 | 2740 |
| Zbp1          | Z-DNA binding protein 1                                              | 1419604_at   | 1.25  | 0.0171 | 2741 |
| Elov1         | elongation of very long chain fatty acids (FEN1/Elo2, SUR4/Elo3, y   | 1456530_x_at | 1.25  | 0.0230 | 2742 |
| Nr2e1         | nuclear receptor subfamily 2, group E, member 1                      | 1457289_at   | -1.25 | 0.0312 | 2743 |
| Diras2        | DIRAS family, GTP-binding RAS-like 2                                 | 1455436_at   | 1.25  | 0.0303 | 2744 |
| Sorbs1        | sorbin and SH3 domain containing 1                                   | 1436737_a_at | -1.25 | 0.0029 | 2745 |
| Prss35        | protease, serine, 35                                                 | 1434195_at   | 1.25  | 0.0337 | 2746 |
| Mm.350038     |                                                                      | 1455769_at   | 1.25  | 0.0036 | 2747 |
| Nelf          | nasal embryonic LHRH factor                                          | 1439398_x_at | -1.25 | 0.0016 | 2748 |
| 6530418L21Rik | RIKEN cDNA 6530418L21 gene                                           | 1444723_at   | 1.25  | 0.0313 | 2749 |
| Aldh1a1       | aldehyde dehydrogenase family 1, subfamily A1                        | 1416468_at   | 1.25  | 0.0217 | 2750 |
| Akap2         | A kinase (PRKA) anchor protein 2                                     | 1449168_a_at | -1.25 | 0.0026 | 2751 |
| 2610029I01Rik | RIKEN cDNA 2610029I01 gene                                           | 1428897_at   | -1.25 | 0.0256 | 2752 |

|               |                                                                   |              |       |          |      |
|---------------|-------------------------------------------------------------------|--------------|-------|----------|------|
| BB117670      |                                                                   | 1439682_at   | 1.25  | 0.0319   | 2753 |
| Nupl2         | nucleoporin like 2                                                | 1456773_at   | -1.25 | 0.0455   | 2754 |
| Rps6ka5       | ribosomal protein S6 kinase, polypeptide 5                        | 1439004_at   | -1.25 | 0.0135   | 2755 |
| St8sia5       | ST8 alpha-N-acetyl-neuraminide alpha-2,8-sialyltransferase 5      | 1421735_a_at | 1.25  | 0.0486   | 2756 |
| AI848100      | expressed sequence AI848100                                       | 1457584_at   | -1.25 | 0.0185   | 2757 |
| Lamb1-1       | laminin B1 subunit 1                                              | 1451241_at   | -1.25 | 0.0053   | 2758 |
| Klf9          | Kruppel-like factor 9                                             | 1428289_at   | 1.25  | 5.50E-05 | 2759 |
| 1445571_at    |                                                                   | 1445571_at   | 1.25  | 0.0397   | 2760 |
| 9630058J23Rik | RIKEN cDNA 9630058J23 gene                                        | 1436795_at   | -1.25 | 0.0069   | 2761 |
| Dip2a         | DIP2 disco-interacting protein 2 homolog A (Drosophila)           | 1452908_at   | -1.25 | 2.40E-05 | 2762 |
| 1438690_at    |                                                                   | 1438690_at   | -1.25 | 0.0011   | 2763 |
| Sqstm1        | sequestosome 1                                                    | 1450957_a_at | 1.25  | 0.0004   | 2764 |
| Arf3          | ADP-ribosylation factor 3                                         | 1421789_s_at | 1.25  | 0.0007   | 2765 |
| 1457678_at    |                                                                   | 1457678_at   | 1.25  | 0.0298   | 2766 |
| C77949        | expressed sequence C77949                                         | 1458915_at   | -1.25 | 0.0137   | 2767 |
| 1437977_at    |                                                                   | 1437977_at   | 1.25  | 0.0160   | 2768 |
| 1452763_at    |                                                                   | 1452763_at   | -1.25 | 0.0035   | 2769 |
| Rab33a        | RAB33A, member of RAS oncogene family                             | 1417529_at   | -1.25 | 0.0023   | 2770 |
| Psmb8         | proteasome (prosome, macropain) subunit, beta type 8 (large multi | 1422962_a_at | 1.25  | 0.0305   | 2771 |
| Gm9706        | predicted gene 9706                                               | 1431591_s_at | 1.25  | 0.0496   | 2772 |
| BB128657      |                                                                   | 1441626_at   | 1.25  | 0.0466   | 2773 |
| Ccr5          | chemokine (C-C motif) receptor 5                                  | 1424727_at   | 1.25  | 0.0463   | 2774 |
| Rhobtb2       | Rho-related BTB domain containing 2                               | 1451517_at   | 1.25  | 0.0001   | 2775 |
| 1428433_at    |                                                                   | 1428433_at   | -1.25 | 0.0002   | 2776 |
| Ckap4         | cytoskeleton-associated protein 4                                 | 1452181_at   | 1.25  | 0.0401   | 2777 |
| Gnb4          | guanine nucleotide binding protein (G protein), beta 4            | 1419469_at   | -1.25 | 0.0032   | 2778 |
| Alkbh7        | alkB, alkylation repair homolog 7 (E. coli)                       | 1428516_a_at | -1.25 | 0.0226   | 2779 |

|               |                                                              |              |       |          |      |
|---------------|--------------------------------------------------------------|--------------|-------|----------|------|
| Stac          | src homology three (SH3) and cysteine rich domain            | 1418957_at   | 1.25  | 0.0450   | 2780 |
| Ranbp3l       | RAN binding protein 3-like                                   | 1455707_at   | -1.25 | 0.0353   | 2781 |
| Intu          | inturned planar cell polarity effector homolog (Drosophila)  | 1454350_at   | -1.25 | 0.0097   | 2782 |
| Nudt17        | nudix (nucleoside diphosphate linked moiety X)-type motif 17 | 1452995_at   | -1.25 | 0.0008   | 2783 |
| Tbc1d2b       | TBC1 domain family, member 2B                                | 1428508_at   | -1.25 | 0.0121   | 2784 |
| Foxp2         | forkhead box P2                                              | 1440108_at   | 1.25  | 0.0216   | 2785 |
| Kcnip1        | Kv channel-interacting protein 1                             | 1416785_at   | 1.25  | 0.0020   | 2786 |
| Pcdh24        | protocadherin 24                                             | 1440218_at   | 1.25  | 0.0059   | 2787 |
| Tbk1          | TANK-binding kinase 1                                        | 1422469_at   | 1.25  | 0.0135   | 2788 |
| H3f3b         | H3 histone, family 3B                                        | 1420376_a_at | 1.25  | 0.0176   | 2789 |
| C77370        | expressed sequence C77370                                    | 1457046_s_at | -1.25 | 0.0088   | 2790 |
| Lasp1         | LIM and SH3 protein 1                                        | 1444947_at   | -1.25 | 0.0220   | 2791 |
| Dnajb4        | DnaJ (Hsp40) homolog, subfamily B, member 4                  | 1431734_a_at | 1.25  | 0.0147   | 2792 |
| Mm.245291     |                                                              | 1458874_at   | -1.25 | 0.0046   | 2793 |
| 1435745_at    |                                                              | 1435745_at   | 1.25  | 0.0145   | 2794 |
| Senp7         | SUMO1/sentrin specific peptidase 7                           | 1436860_at   | -1.25 | 0.0170   | 2795 |
| Fam114a2      | family with sequence similarity 114, member A2               | 1424253_at   | -1.25 | 0.0008   | 2796 |
| Ttc7b         | tetratricopeptide repeat domain 7B                           | 1433460_at   | -1.25 | 0.0158   | 2797 |
| A130078K24Rik | RIKEN cDNA A130078K24 gene                                   | 1444482_at   | 1.25  | 0.0160   | 2798 |
| Atp2c1        | ATPase, Ca <sup>++</sup> -sequestering                       | 1434386_at   | -1.25 | 5.30E-05 | 2799 |
| A330008L17Rik | RIKEN cDNA A330008L17 gene                                   | 1457318_at   | -1.25 | 0.0059   | 2800 |
| Robo2         | roundabout homolog 2 (Drosophila)                            | 1458229_at   | -1.25 | 0.0116   | 2801 |
| 1437843_s_at  |                                                              | 1437843_s_at | 1.25  | 0.0076   | 2802 |
| 1700071A11Rik | RIKEN cDNA 1700071A11 gene                                   | 1439967_at   | 1.25  | 0.0091   | 2803 |
| 1441422_at    |                                                              | 1441422_at   | -1.25 | 0.0277   | 2804 |
| 1435542_s_at  |                                                              | 1435542_s_at | 1.25  | 0.0319   | 2805 |
| Dennd1a       | DENN/MADD domain containing 1A                               | 1424625_a_at | -1.25 | 0.0456   | 2806 |



|               |                                                                   |              |       |          |      |
|---------------|-------------------------------------------------------------------|--------------|-------|----------|------|
| 6330403L08Rik | RIKEN cDNA 6330403L08 gene                                        | 1453087_at   | -1.25 | 0.0002   | 2807 |
| 1444515_at    |                                                                   | 1444515_at   | -1.25 | 0.0239   | 2808 |
| Tmem176a      | transmembrane protein 176A                                        | 1441811_x_at | 1.25  | 0.0304   | 2809 |
| AI314180      | expressed sequence AI314180                                       | 1439127_at   | 1.25  | 0.0235   | 2810 |
| 1455494_at    |                                                                   | 1455494_at   | 1.25  | 0.0010   | 2811 |
| Nudt4         | nudix (nucleoside diphosphate linked moiety X)-type motif 4       | 1418505_at   | -1.25 | 1.20E-05 | 2812 |
| Ccbl2         | cysteine conjugate-beta lyase 2                                   | 1455991_at   | -1.25 | 0.0014   | 2813 |
| 4931417G12Rik | RIKEN cDNA 4931417G12 gene                                        | 1429865_at   | -1.25 | 0.0001   | 2814 |
| BB394466      |                                                                   | 1440790_x_at | 1.25  | 0.0265   | 2815 |
| 1456022_at    |                                                                   | 1456022_at   | -1.25 | 0.0004   | 2816 |
| 1453514_at    |                                                                   | 1453514_at   | 1.25  | 0.0276   | 2817 |
| Fam57b        | family with sequence similarity 57, member B                      | 1452807_s_at | -1.25 | 0.0379   | 2818 |
| Cd55          | CD55 antigen                                                      | 1460242_at   | 1.25  | 0.0050   | 2819 |
| Kcnh3         | potassium voltage-gated channel, subfamily H (eag-related), memb  | 1445805_x_at | 1.25  | 0.0199   | 2820 |
| Arpp21        | cyclic AMP-regulated phosphoprotein, 21                           | 1419028_at   | -1.25 | 0.0125   | 2821 |
| Fam55c        | family with sequence similarity 55, member C                      | 1436941_at   | -1.25 | 0.0222   | 2822 |
| BB265744      |                                                                   | 1458134_at   | -1.25 | 0.0219   | 2823 |
| Vcam1         | vascular cell adhesion molecule 1                                 | 1415989_at   | 1.25  | 0.0369   | 2824 |
| Setd7         | SET domain containing (lysine methyltransferase) 7                | 1423003_at   | 1.25  | 0.0192   | 2825 |
| Mbnl2         | muscleblind-like 2                                                | 1455827_at   | 1.25  | 0.0100   | 2826 |
| Agtr1a        | angiotensin II receptor, type 1a                                  | 1436739_at   | -1.25 | 0.0072   | 2827 |
| 1436316_at    |                                                                   | 1436316_at   | 1.25  | 0.0282   | 2828 |
| 1440338_at    |                                                                   | 1440338_at   | 1.25  | 0.0380   | 2829 |
| Actn4         | actinin alpha 4                                                   | 1423449_a_at | 1.25  | 0.0027   | 2830 |
| Cytip         | cytohesin 1 interacting protein                                   | 1451206_s_at | 1.25  | 0.0077   | 2831 |
| Slc4a7        | solute carrier family 4, sodium bicarbonate cotransporter, member | 1455876_at   | -1.25 | 0.0145   | 2832 |
| Clock         | circadian locomotor output cycles kaput                           | 1418659_at   | 1.25  | 0.0035   | 2833 |

|               |                                                                  |              |       |          |      |
|---------------|------------------------------------------------------------------|--------------|-------|----------|------|
| 1436133_at    |                                                                  | 1436133_at   | 1.25  | 0.0055   | 2834 |
| 1441295_at    |                                                                  | 1441295_at   | 1.25  | 0.0191   | 2835 |
| Bhlhe40       | basic helix-loop-helix family, member e40                        | 1418025_at   | 1.25  | 0.0013   | 2836 |
| Ckmt1         | creatine kinase, mitochondrial 1, ubiquitous                     | 1432418_a_at | -1.25 | 0.0001   | 2837 |
| 4833424O15Rik | RIKEN cDNA 4833424O15 gene                                       | 1429249_at   | 1.25  | 0.0155   | 2838 |
| Gm239         | predicted gene 239                                               | 1447416_at   | -1.25 | 0.0133   | 2839 |
| Mm.37652      |                                                                  | 1458640_at   | -1.25 | 0.0135   | 2840 |
| Mm.361200     |                                                                  | 1441691_at   | 1.25  | 0.0080   | 2841 |
| 2310044G17Rik | RIKEN cDNA 2310044G17 gene                                       | 1424913_at   | 1.25  | 0.0132   | 2842 |
| Dcxr          | dicarbonyl L-xylulose reductase                                  | 1419456_at   | -1.25 | 0.0148   | 2843 |
| Ctnn          | cortactin                                                        | 1423917_a_at | -1.25 | 0.0009   | 2844 |
| Pcdh10        | protocadherin 10                                                 | 1421311_at   | -1.25 | 0.0020   | 2845 |
| BB238358      |                                                                  | 1427335_at   | -1.25 | 0.0061   | 2846 |
| Mgea5         | meningioma expressed antigen 5 (hyaluronidase)                   | 1422901_at   | 1.25  | 0.0009   | 2847 |
| Ifih1         | interferon induced with helicase C domain 1                      | 1426276_at   | 1.25  | 0.0331   | 2848 |
| Nipal2        | NIPA-like domain containing 2                                    | 1424612_at   | 1.25  | 0.0039   | 2849 |
| AU015536      | expressed sequence AU015536                                      | 1445025_at   | 1.24  | 0.0168   | 2850 |
| 2310007H09Rik | RIKEN cDNA 2310007H09 gene                                       | 1452889_at   | -1.24 | 0.0093   | 2851 |
| Ppp1r2        | protein phosphatase 1, regulatory (inhibitor) subunit 2          | 1456830_at   | 1.24  | 0.0137   | 2852 |
| 1110032F04Rik | RIKEN cDNA 1110032F04 gene                                       | 1456509_at   | -1.24 | 0.0490   | 2853 |
| 1420018_s_at  |                                                                  | 1420018_s_at | -1.24 | 0.0154   | 2854 |
| Mcf2          | mcf.2 transforming sequence                                      | 1419021_at   | 1.24  | 0.0449   | 2855 |
| Kcnh3         | potassium voltage-gated channel, subfamily H (eag-related), memb | 1459107_at   | 1.24  | 0.0220   | 2856 |
| Aven          | apoptosis, caspase activation inhibitor                          | 1452996_a_at | -1.24 | 0.0027   | 2857 |
| Arrb2         | arrestin, beta 2                                                 | 1451987_at   | 1.24  | 9.10E-05 | 2858 |
| 3830612M24    | hypothetical protein 3830612M24                                  | 1435672_at   | 1.24  | 0.0284   | 2859 |
| Galnt1        | UDP-N-acetyl-alpha-D-galactosamine:polypeptide N-acetylgalact    | 1416760_at   | -1.24 | 0.0354   | 2860 |

|            |                                                                |              |       |        |      |
|------------|----------------------------------------------------------------|--------------|-------|--------|------|
| Fam57b     | family with sequence similarity 57, member B                   | 1438641_x_at | -1.24 | 0.0185 | 2861 |
| Igh-VJ558  | immunoglobulin heavy chain (J558 family)                       | 1425763_x_at | 1.24  | 0.0044 | 2862 |
| Stard3     | START domain containing 3                                      | 1417405_at   | 1.24  | 0.0018 | 2863 |
| Fam98c     | family with sequence similarity 98, member C                   | 1451143_at   | 1.24  | 0.0144 | 2864 |
| Nrf1       | nuclear respiratory factor 1                                   | 1420978_at   | 1.24  | 0.0417 | 2865 |
| Spint1     | serine protease inhibitor, Kunitz type 1                       | 1416627_at   | -1.24 | 0.0134 | 2866 |
| Elmod3     | ELMO/CED-12 domain containing 3                                | 1436695_x_at | -1.24 | 0.0249 | 2867 |
| Nmbr       | neuromedin B receptor                                          | 1422342_at   | 1.24  | 0.0048 | 2868 |
| Gjb6       | gap junction protein, beta 6                                   | 1448397_at   | 1.24  | 0.0095 | 2869 |
| 1450190_at |                                                                | 1450190_at   | 1.24  | 0.0386 | 2870 |
| Spock2     | sparc/osteonectin, cwcv and kazal-like domains proteoglycan 2  | 1435026_at   | -1.24 | 0.0369 | 2871 |
| D13Ert787e | DNA segment, Chr 13, ERATO Doi 787, expressed                  | 1420098_s_at | -1.24 | 0.0124 | 2872 |
| Sdk1       | sidekick homolog 1 (chicken)                                   | 1445326_at   | 1.24  | 0.0052 | 2873 |
| BE991564   |                                                                | 1447005_at   | -1.24 | 0.0137 | 2874 |
| Pigm       | phosphatidylinositol glycan anchor biosynthesis, class M       | 1418964_at   | 1.24  | 0.0215 | 2875 |
| Esam       | endothelial cell-specific adhesion molecule                    | 1460356_at   | 1.24  | 0.0372 | 2876 |
| Gpc4       | glypican 4                                                     | 1421088_at   | -1.24 | 0.0382 | 2877 |
| Rrp8       | ribosomal RNA processing 8, methyltransferase, homolog (yeast) | 1416559_at   | 1.24  | 0.0303 | 2878 |
| Pdcd10     | programmed cell death 10                                       | 1458938_at   | 1.24  | 0.0266 | 2879 |
| Klf6       | Kruppel-like factor 6                                          | 1433508_at   | 1.24  | 0.0048 | 2880 |
| Rbms2      | RNA binding motif, single stranded interacting protein 2       | 1433979_at   | 1.24  | 0.0168 | 2881 |
| Dctd       | dCMP deaminase                                                 | 1454659_at   | -1.24 | 0.0382 | 2882 |
| BB318743   |                                                                | 1435822_at   | -1.24 | 0.0323 | 2883 |
| Il1r1      | interleukin 1 receptor-like 1                                  | 1425145_at   | 1.24  | 0.0275 | 2884 |
| Myo18a     | myosin XVIIIa                                                  | 1451422_at   | 1.24  | 0.0036 | 2885 |
| Ltbp1      | latent transforming growth factor beta binding protein 1       | 1448870_at   | 1.24  | 0.0388 | 2886 |
| Fastkd1    | FAST kinase domains 1                                          | 1427342_at   | -1.24 | 0.0279 | 2887 |

|               |                                                                 |              |       |          |      |
|---------------|-----------------------------------------------------------------|--------------|-------|----------|------|
| Adam23        | a disintegrin and metallopeptidase domain 23                    | 1423378_at   | 1.24  | 0.0302   | 2888 |
| Gsto1         | glutathione S-transferase omega 1                               | 1456036_x_at | -1.24 | 0.0007   | 2889 |
| Ube2v2        | ubiquitin-conjugating enzyme E2 variant 2                       | 1417984_at   | 1.24  | 0.0006   | 2890 |
| 1110065P20Rik | RIKEN cDNA 1110065P20 gene                                      | 1455545_at   | -1.24 | 9.10E-06 | 2891 |
| Cntlh         | centlein, centrosomal protein                                   | 1451469_at   | -1.24 | 0.0392   | 2892 |
| Aloxe3        | arachidonate lipoxygenase 3                                     | 1449237_at   | -1.24 | 0.0251   | 2893 |
| 1421236_at    |                                                                 | 1421236_at   | -1.24 | 0.0089   | 2894 |
| Ddx26b        | DEAD/H (Asp-Glu-Ala-Asp/His) box polypeptide 26B                | 1426832_at   | -1.24 | 0.0011   | 2895 |
| 1435968_at    |                                                                 | 1435968_at   | -1.24 | 0.0005   | 2896 |
| 1447056_at    |                                                                 | 1447056_at   | -1.24 | 0.0047   | 2897 |
| 1429870_at    |                                                                 | 1429870_at   | -1.24 | 0.0425   | 2898 |
| Srp54a        | signal recognition particle 54a                                 | 1416154_at   | 1.24  | 0.0229   | 2899 |
| 1430357_at    |                                                                 | 1430357_at   | 1.24  | 0.0163   | 2900 |
| Mm.442080     |                                                                 | 1444441_at   | -1.24 | 0.0069   | 2901 |
| Dusp7         | dual specificity phosphatase 7                                  | 1452097_a_at | 1.24  | 0.0038   | 2902 |
| Ufsp1         | UFM1-specific peptidase 1                                       | 1417807_at   | 1.24  | 0.0005   | 2903 |
| Nus1          | nuclear undecaprenyl pyrophosphate synthase 1 homolog (S. cerev | 1420646_at   | 1.24  | 0.0200   | 2904 |
| Sart3         | squamous cell carcinoma antigen recognized by T-cells 3         | 1417547_at   | 1.24  | 0.0002   | 2905 |
| Cpa1          | carboxypeptidase A1                                             | 1428062_at   | 1.24  | 0.0017   | 2906 |
| AI845619      | expressed sequence AI845619                                     | 1442726_s_at | 1.24  | 0.0048   | 2907 |
| 1418012_at    |                                                                 | 1418012_at   | 1.24  | 0.0058   | 2908 |
| Tbc1d15       | TBC1 domain family, member 15                                   | 1416060_at   | 1.24  | 0.0437   | 2909 |
| Gm9885        | predicted gene 9885                                             | 1425397_at   | -1.24 | 0.0210   | 2910 |
| Camk2n1       | calcium/calmodulin-dependent protein kinase II inhibitor 1      | 1456609_at   | 1.24  | 0.0005   | 2911 |
| Tm9sf3        | transmembrane 9 superfamily member 3                            | 1448375_at   | 1.24  | 0.0091   | 2912 |
| Vldlr         | very low density lipoprotein receptor                           | 1417900_a_at | -1.24 | 0.0221   | 2913 |
| 1810007M14Rik | RIKEN cDNA 1810007M14 gene                                      | 1418008_at   | 1.24  | 0.0039   | 2914 |

|               |                                                                         |              |       |        |      |
|---------------|-------------------------------------------------------------------------|--------------|-------|--------|------|
| Frmpd3        | FERM and PDZ domain containing 3                                        | 1446506_at   | -1.24 | 0.0251 | 2915 |
| C77370        | expressed sequence C77370                                               | 1419968_at   | -1.24 | 0.0110 | 2916 |
| Pdk4          | pyruvate dehydrogenase kinase, isoenzyme 4                              | 1417273_at   | -1.24 | 0.0385 | 2917 |
| 2810032G03Rik | RIKEN cDNA 2810032G03 gene                                              | 1453262_at   | -1.24 | 0.0059 | 2918 |
| Wnk1          | WNK lysine deficient protein kinase 1                                   | 1430109_at   | -1.24 | 0.0130 | 2919 |
| Pank3         | pantothenate kinase 3                                                   | 1426259_at   | 1.24  | 0.0476 | 2920 |
| Alox8         | arachidonate 8-lipoxygenase                                             | 1425376_at   | -1.24 | 0.0466 | 2921 |
| Aldh9a1       | aldehyde dehydrogenase 9, subfamily A1                                  | 1436689_a_at | -1.24 | 0.0408 | 2922 |
| Mm.406371     |                                                                         | 1442604_at   | 1.24  | 0.0032 | 2923 |
| Tbk1          | TANK-binding kinase 1                                                   | 1460315_s_at | 1.24  | 0.0225 | 2924 |
| Sec14i5       | SEC14-like 5 (S. cerevisiae)                                            | 1441636_at   | -1.24 | 0.0463 | 2925 |
| Fgfr3         | fibroblast growth factor receptor 3                                     | 1425796_a_at | 1.24  | 0.0153 | 2926 |
| 1454336_at    |                                                                         | 1454336_at   | -1.24 | 0.0050 | 2927 |
| Rbms1         | RNA binding motif, single stranded interacting protein 1                | 1458578_at   | 1.24  | 0.0013 | 2928 |
| Mtdh          | metadherin                                                              | 1455129_at   | 1.24  | 0.0264 | 2929 |
| Slc25a29      | solute carrier family 25 (mitochondrial carrier, palmitoylcarnitine tra | 1423981_x_at | -1.24 | 0.0030 | 2930 |
| 5730494M16Rik | RIKEN cDNA 5730494M16 gene                                              | 1428189_at   | -1.24 | 0.0001 | 2931 |
| 1437533_at    |                                                                         | 1437533_at   | -1.24 | 0.0134 | 2932 |
| Dusp16        | dual specificity phosphatase 16                                         | 1440651_at   | 1.24  | 0.0339 | 2933 |
| Opn3          | opsin 3                                                                 | 1417677_at   | 1.24  | 0.0207 | 2934 |
| Aard          | alanine and arginine rich domain containing protein                     | 1434528_at   | -1.24 | 0.0006 | 2935 |
| 1430694_at    |                                                                         | 1430694_at   | -1.24 | 0.0375 | 2936 |
| 1443702_at    |                                                                         | 1443702_at   | -1.24 | 0.0156 | 2937 |
| Slc8a2        | solute carrier family 8 (sodium/calcium exchanger), member 2            | 1428054_at   | 1.24  | 0.0039 | 2938 |
| Nudt21        | nudix (nucleoside diphosphate linked moiety X)-type motif 21            | 1428339_at   | -1.24 | 0.0111 | 2939 |
| Zfp318        | zinc finger protein 318                                                 | 1421478_a_at | 1.24  | 0.0240 | 2940 |
| Klhl2         | kelch-like 2, Mayven (Drosophila)                                       | 1426978_at   | 1.24  | 0.0032 | 2941 |

|               |                                                                     |              |       |          |      |
|---------------|---------------------------------------------------------------------|--------------|-------|----------|------|
| Mm.101524     |                                                                     | 1458843_at   | -1.24 | 0.0079   | 2942 |
| 4933431E20Rik | RIKEN cDNA 4933431E20 gene                                          | 1434868_at   | -1.24 | 0.0129   | 2943 |
| Rps6ka6       | ribosomal protein S6 kinase polypeptide 6                           | 1429759_at   | -1.24 | 0.0322   | 2944 |
| Fam102a       | family with sequence similarity 102, member A                       | 1426894_s_at | -1.24 | 0.0334   | 2945 |
| Ddr1          | discoidin domain receptor family, member 1                          | 1415798_at   | 1.24  | 0.0053   | 2946 |
| Pbx2          | pre B-cell leukemia transcription factor 2                          | 1418893_at   | -1.24 | 0.0138   | 2947 |
| Nfatc2        | nuclear factor of activated T-cells, cytoplasmic, calcineurin-depen | 1439205_at   | 1.24  | 0.0427   | 2948 |
| 5730427N09Rik | RIKEN cDNA 5730427N09 gene                                          | 1423132_a_at | -1.24 | 0.0008   | 2949 |
| Plp2          | proteolipid protein 2                                               | 1453572_a_at | 1.24  | 0.0333   | 2950 |
| Fez2          | fasciculation and elongation protein zeta 2 (zygin II)              | 1434348_at   | -1.24 | 0.0003   | 2951 |
| Ankrd6        | ankyrin repeat domain 6                                             | 1450227_at   | -1.24 | 0.0348   | 2952 |
| 1427113_s_at  |                                                                     | 1427113_s_at | 1.24  | 0.0016   | 2953 |
| Glce          | glucuronyl C5-epimerase                                             | 1425876_a_at | 1.24  | 0.0211   | 2954 |
| Cyb561d1      | cytochrome b-561 domain containing 1                                | 1434226_at   | 1.24  | 0.0376   | 2955 |
| Thop1         | thimet oligopeptidase 1                                             | 1448907_at   | 1.24  | 0.0161   | 2956 |
| 1451029_at    |                                                                     | 1451029_at   | -1.24 | 0.0147   | 2957 |
| 1700027A23Rik | RIKEN cDNA 1700027A23 gene                                          | 1453320_at   | -1.24 | 0.0014   | 2958 |
| 1443249_at    |                                                                     | 1443249_at   | 1.24  | 2.80E-05 | 2959 |
| 1436514_at    |                                                                     | 1436514_at   | -1.24 | 0.0237   | 2960 |
| Gpx7          | glutathione peroxidase 7                                            | 1417836_at   | 1.24  | 0.0179   | 2961 |
| Rnf24         | ring finger protein 24                                              | 1453929_at   | 1.24  | 0.0484   | 2962 |
| Rian          | RNA imprinted and accumulated in nucleus                            | 1452899_at   | 1.24  | 0.0086   | 2963 |
| Nol8          | nucleolar protein 8                                                 | 1452974_at   | -1.24 | 0.0059   | 2964 |
| Rab36         | RAB36, member RAS oncogene family                                   | 1455064_at   | -1.24 | 0.0144   | 2965 |
| AI854703      | expressed sequence AI854703                                         | 1435049_s_at | -1.24 | 0.0157   | 2966 |
| Smarcd3       | SWI/SNF related, matrix associated, actin dependent regulator of c  | 1418467_at   | -1.24 | 0.0140   | 2967 |
| Gmds          | GDP-mannose 4, 6-dehydratase                                        | 1434158_at   | -1.24 | 4.60E-05 | 2968 |

|               |                                                                     |              |       |          |      |
|---------------|---------------------------------------------------------------------|--------------|-------|----------|------|
| 2610002M06Rik | RIKEN cDNA 2610002M06 gene                                          | 1419690_at   | -1.24 | 0.0018   | 2969 |
| Telo2         | TEL2, telomere maintenance 2, homolog (S. cerevisiae)               | 1423888_at   | -1.24 | 0.0222   | 2970 |
| Aplnr         | apelin receptor                                                     | 1423037_at   | 1.24  | 0.0119   | 2971 |
| St3gal5       | ST3 beta-galactoside alpha-2,3-sialyltransferase 5                  | 1460241_a_at | 1.24  | 0.0273   | 2972 |
| C030011L09Rik | RIKEN cDNA C030011L09 gene                                          | 1430068_at   | -1.24 | 0.0346   | 2973 |
| Stxbp1        | syntaxin binding protein 1                                          | 1420505_a_at | 1.24  | 0.0002   | 2974 |
| B430319G15Rik | RIKEN cDNA B430319G15 gene                                          | 1459230_at   | -1.24 | 0.0492   | 2975 |
| 1428474_at    |                                                                     | 1428474_at   | 1.24  | 0.0262   | 2976 |
| Gusb          | glucuronidase, beta                                                 | 1448124_at   | 1.24  | 0.0238   | 2977 |
| 1428510_at    |                                                                     | 1428510_at   | 1.24  | 9.50E-05 | 2978 |
| Enpp6         | ectonucleotide pyrophosphatase/phosphodiesterase 6                  | 1438785_at   | 1.24  | 0.0215   | 2979 |
| Rwdd2b        | RWD domain containing 2B                                            | 1419760_a_at | -1.24 | 0.0094   | 2980 |
| Mm.477988     |                                                                     | 1423666_s_at | -1.24 | 0.0340   | 2981 |
| E030049G20Rik | RIKEN cDNA E030049G20 gene                                          | 1444190_at   | -1.24 | 0.0141   | 2982 |
| Tmem81        | transmembrane protein 81                                            | 1453302_at   | -1.24 | 0.0043   | 2983 |
| 1453687_at    |                                                                     | 1453687_at   | -1.24 | 0.0061   | 2984 |
| Map3k7ip3     | mitogen-activated protein kinase kinase kinase 7 interacting protei | 1428762_at   | 1.24  | 0.0006   | 2985 |
| Plcb1         | phospholipase C, beta 1                                             | 1421170_a_at | 1.24  | 0.0286   | 2986 |
| Mm.472995     |                                                                     | 1446455_at   | 1.24  | 0.0105   | 2987 |
| A730056I06Rik | RIKEN cDNA A730056I06 gene                                          | 1439894_at   | -1.24 | 0.0351   | 2988 |
| Agxt2l2       | alanine-glyoxylate aminotransferase 2-like 2                        | 1424745_at   | 1.24  | 0.0066   | 2989 |
| Vopp1         | vesicular, overexpressed in cancer, prosurvival protein 1           | 1451127_at   | 1.24  | 0.0138   | 2990 |
| Glt25d2       | glycosyltransferase 25 domain containing 2                          | 1437930_at   | -1.24 | 0.0280   | 2991 |
| 4933415E08Rik | RIKEN cDNA 4933415E08 gene                                          | 1439497_at   | -1.24 | 0.0062   | 2992 |
| Siva1         | SIVA1, apoptosis-inducing factor                                    | 1433680_x_at | -1.24 | 0.0023   | 2993 |
| 1442169_at    |                                                                     | 1442169_at   | -1.24 | 0.0331   | 2994 |
| Abcg4         | ATP-binding cassette, sub-family G (WHITE), member 4                | 1424437_s_at | -1.24 | 0.0086   | 2995 |

|               |                                                                    |              |       |        |      |
|---------------|--------------------------------------------------------------------|--------------|-------|--------|------|
| 1444396_at    |                                                                    | 1444396_at   | 1.24  | 0.0181 | 2996 |
| Tdgf1         | teratocarcinoma-derived growth factor 1                            | 1450989_at   | 1.24  | 0.0187 | 2997 |
| Tnnt1         | troponin T1, skeletal, slow                                        | 1419606_a_at | 1.24  | 0.0054 | 2998 |
| Cadm1         | cell adhesion molecule 1                                           | 1417378_at   | -1.24 | 0.0180 | 2999 |
| Plcx2         | phosphatidylinositol-specific phospholipase C, X domain containing | 1455324_at   | 1.24  | 0.0219 | 3000 |
| Agxt          | alanine-glyoxylate aminotransferase                                | 1418833_at   | 1.24  | 0.0290 | 3001 |
| Mfap3l        | microfibrillar-associated protein 3-like                           | 1441481_at   | 1.24  | 0.0041 | 3002 |
| 1434395_at    |                                                                    | 1434395_at   | 1.24  | 0.0001 | 3003 |
| Bcs1l         | BCS1-like (yeast)                                                  | 1451541_at   | -1.23 | 0.0001 | 3004 |
| Osbpl5        | oxysterol binding protein-like 5                                   | 1425391_a_at | 1.23  | 0.0433 | 3005 |
| Vnn1          | vanin 1                                                            | 1418486_at   | -1.23 | 0.0013 | 3006 |
| Mlec          | malectin                                                           | 1436508_at   | 1.23  | 0.0079 | 3007 |
| Dock4         | dedicator of cytokinesis 4                                         | 1436405_at   | -1.23 | 0.0077 | 3008 |
| Dnm3          | dynamamin 3                                                        | 1446694_at   | -1.23 | 0.0247 | 3009 |
| Tmcc3         | transmembrane and coiled coil domains 3                            | 1434252_at   | 1.23  | 0.0281 | 3010 |
| Chpt1         | choline phosphotransferase 1                                       | 1426146_a_at | 1.23  | 0.0148 | 3011 |
| Sox2          | SRY-box containing gene 2                                          | 1416967_at   | -1.23 | 0.0150 | 3012 |
| Senp7         | SUMO1/sentrin specific peptidase 7                                 | 1438413_at   | -1.23 | 0.0482 | 3013 |
| Cap2          | CAP, adenylate cyclase-associated protein, 2 (yeast)               | 1450910_at   | -1.23 | 0.0128 | 3014 |
| Fam65b        | family with sequence similarity 65, member B                       | 1460555_at   | -1.23 | 0.0002 | 3015 |
| St6galnac5    | ST6 (alpha-N-acetyl-neuraminyl-2,3-beta-galactosyl-1,3)-N-acetyl   | 1419420_at   | -1.23 | 0.0124 | 3016 |
| 1458103_at    |                                                                    | 1458103_at   | 1.23  | 0.0262 | 3017 |
| E430028B21Rik | RIKEN cDNA E430028B21 gene                                         | 1443869_at   | 1.23  | 0.0236 | 3018 |
| Cit           | citron                                                             | 1427669_a_at | 1.23  | 0.0453 | 3019 |
| Phf20         | PHD finger protein 20                                              | 1426961_at   | -1.23 | 0.0175 | 3020 |
| 1436541_at    |                                                                    | 1436541_at   | 1.23  | 0.0265 | 3021 |
| Camk2n2       | calcium/calmodulin-dependent protein kinase II inhibitor 2         | 1429204_at   | -1.23 | 0.0259 | 3022 |



|               |                                                                 |              |       |          |      |
|---------------|-----------------------------------------------------------------|--------------|-------|----------|------|
| BB463084      |                                                                 | 1439729_at   | -1.23 | 0.0266   | 3023 |
| Cenpb         | centromere protein B                                            | 1426051_a_at | 1.23  | 0.0290   | 3024 |
| Mycl1         | v-myc myelocytomatosis viral oncogene homolog 1, lung carcinoma | 1422088_at   | -1.23 | 0.0217   | 3025 |
| Rnd1          | Rho family GTPase 1                                             | 1455197_at   | -1.23 | 0.0474   | 3026 |
| Sec24b        | Sec24 related gene family, member B (S. cerevisiae)             | 1426849_at   | 1.23  | 0.0034   | 3027 |
| Phactr3       | phosphatase and actin regulator 3                               | 1429651_at   | -1.23 | 0.0015   | 3028 |
| Hist2h3c1     | histone cluster 2, H3c1                                         | 1442051_at   | -1.23 | 0.0151   | 3029 |
| Kcnj6         | potassium inwardly-rectifying channel, subfamily J, member 6    | 1421581_at   | 1.23  | 0.0056   | 3030 |
| BG068484      |                                                                 | 1445096_at   | -1.23 | 0.0194   | 3031 |
| Epha4         | Eph receptor A4                                                 | 1429021_at   | 1.23  | 0.0467   | 3032 |
| 1445827_at    |                                                                 | 1445827_at   | -1.23 | 0.0317   | 3033 |
| Gpr65         | G-protein coupled receptor 65                                   | 1449175_at   | 1.23  | 0.0213   | 3034 |
| Kif24         | kinesin family member 24                                        | 1431937_at   | 1.23  | 3.10E-05 | 3035 |
| 1500010J02Rik | RIKEN cDNA 1500010J02 gene                                      | 1423655_a_at | 1.23  | 0.0087   | 3036 |
| 1455361_at    |                                                                 | 1455361_at   | 1.23  | 0.0130   | 3037 |
| 1417195_at    |                                                                 | 1417195_at   | 1.23  | 0.0054   | 3038 |
| Perp          | PERP, TP53 apoptosis effector                                   | 1416271_at   | 1.23  | 0.0498   | 3039 |
| 1434825_at    |                                                                 | 1434825_at   | -1.23 | 0.0099   | 3040 |
| Setd6         | SET domain containing 6                                         | 1428797_at   | -1.23 | 0.0281   | 3041 |
| Lnx2          | ligand of numb-protein X 2                                      | 1460249_at   | -1.23 | 0.0166   | 3042 |
| 1434998_at    |                                                                 | 1434998_at   | 1.23  | 0.0301   | 3043 |
| Lamc1         | laminin, gamma 1                                                | 1423885_at   | 1.23  | 0.0416   | 3044 |
| Kcnj4         | potassium inwardly-rectifying channel, subfamily J, member 4    | 1451808_at   | -1.23 | 0.0093   | 3045 |
| 1459197_at    |                                                                 | 1459197_at   | 1.23  | 0.0024   | 3046 |
| AU043011      |                                                                 | 1445351_at   | 1.23  | 0.0318   | 3047 |
| Gcom1         | GRINL1A complex locus                                           | 1455180_at   | 1.23  | 0.0445   | 3048 |
| Ubp2l         | ubiquitin associated protein 2-like                             | 1433541_a_at | 1.23  | 0.0116   | 3049 |

|               |                                                                   |              |       |        |      |
|---------------|-------------------------------------------------------------------|--------------|-------|--------|------|
| Tbc1d8        | TBC1 domain family, member 8                                      | 1455683_a_at | 1.23  | 0.0086 | 3050 |
| Zmym5         | zinc finger, MYM-type 5                                           | 1425577_at   | 1.23  | 0.0004 | 3051 |
| Sema3c        | sema domain, immunoglobulin domain (Ig), short basic domain, secr | 1420696_at   | 1.23  | 0.0013 | 3052 |
| Rras          | Harvey rat sarcoma oncogene, subgroup R                           | 1418448_at   | 1.23  | 0.0394 | 3053 |
| Fgf14         | fibroblast growth factor 14                                       | 1435747_at   | -1.23 | 0.0093 | 3054 |
| Dab1          | disabled homolog 1 (Drosophila)                                   | 1435578_s_at | -1.23 | 0.0221 | 3055 |
| Parp3         | poly (ADP-ribose) polymerase family, member 3                     | 1445888_x_at | 1.23  | 0.0399 | 3056 |
| 1443173_at    |                                                                   | 1443173_at   | -1.23 | 0.0009 | 3057 |
| Dpp4          | dipeptidylpeptidase 4                                             | 1441242_at   | 1.23  | 0.0186 | 3058 |
| Lbp           | lipopolysaccharide binding protein                                | 1448550_at   | 1.23  | 0.0194 | 3059 |
| 1436921_at    |                                                                   | 1436921_at   | 1.23  | 0.0424 | 3060 |
| Bdh1          | 3-hydroxybutyrate dehydrogenase, type 1                           | 1452257_at   | -1.23 | 0.0247 | 3061 |
| Crtc1         | CREB regulated transcription coactivator 1                        | 1458443_at   | 1.23  | 0.0001 | 3062 |
| Lgmn          | legumain                                                          | 1448883_at   | 1.23  | 0.0265 | 3063 |
| Avpr1a        | arginine vasopressin receptor 1A                                  | 1418603_at   | -1.23 | 0.0161 | 3064 |
| Serinc5       | serine incorporator 5                                             | 1433571_at   | -1.23 | 0.0021 | 3065 |
| Tcn2          | transcobalamin 2                                                  | 1448200_at   | 1.23  | 0.0064 | 3066 |
| Nkain2        | Na <sup>+</sup> /K <sup>+</sup> transporting ATPase interacting 2 | 1429901_at   | -1.23 | 0.0119 | 3067 |
| Bcl11b        | B-cell leukemia/lymphoma 11B                                      | 1450339_a_at | -1.23 | 0.0292 | 3068 |
| Mcart1        | mitochondrial carrier triple repeat 1                             | 1454712_at   | 1.23  | 0.0002 | 3069 |
| Gsr           | glutathione reductase                                             | 1421816_at   | 1.23  | 0.0102 | 3070 |
| Rmnd5a        | required for meiotic nuclear division 5 homolog A (S. cerevisiae) | 1431068_at   | 1.23  | 0.0367 | 3071 |
| Ptpdc1        | protein tyrosine phosphatase domain containing 1                  | 1433823_at   | 1.23  | 0.0275 | 3072 |
| 1435795_at    |                                                                   | 1435795_at   | -1.23 | 0.0337 | 3073 |
| Glb1l         | galactosidase, beta 1-like                                        | 1430385_a_at | 1.23  | 0.0200 | 3074 |
| C130090K23Rik | RIKEN cDNA C130090K23 gene                                        | 1426268_at   | 1.23  | 0.0440 | 3075 |
| Chrdl1        | chordin-like 1                                                    | 1434201_at   | -1.23 | 0.0286 | 3076 |

|               |                                                                         |              |       |          |      |
|---------------|-------------------------------------------------------------------------|--------------|-------|----------|------|
| Slc29a3       | solute carrier family 29 (nucleoside transporters), member 3            | 1451013_at   | 1.23  | 0.0097   | 3077 |
| Kcnab1        | potassium voltage-gated channel, shaker-related subfamily, beta nr      | 1448468_a_at | -1.23 | 0.0045   | 3078 |
| Pogk          | pogo transposable element with KRAB domain                              | 1447864_s_at | -1.23 | 0.0108   | 3079 |
| Mycn          | v-myc myelocytomatosis viral related oncogene, neuroblastoma de         | 1425922_a_at | -1.23 | 0.0316   | 3080 |
| 1453078_at    |                                                                         | 1453078_at   | -1.23 | 0.0291   | 3081 |
| Sorbs1        | sorbin and SH3 domain containing 1                                      | 1428471_at   | -1.23 | 0.0029   | 3082 |
| Ccnjl         | cyclin J-like                                                           | 1456168_at   | -1.23 | 0.0137   | 3083 |
| Slc25a29      | solute carrier family 25 (mitochondrial carrier, palmitoylcarnitine tra | 1438187_at   | -1.23 | 0.0016   | 3084 |
| Irak1bp1      | interleukin-1 receptor-associated kinase 1 binding protein 1            | 1431771_a_at | -1.23 | 0.0004   | 3085 |
| Pi4ka         | phosphatidylinositol 4-kinase, catalytic, alpha polypeptide             | 1435003_at   | 1.23  | 0.0115   | 3086 |
| Otud7a        | OTU domain containing 7A                                                | 1450250_at   | 1.23  | 1.80E-06 | 3087 |
| Myog          | myogenin                                                                | 1419391_at   | 1.23  | 0.0370   | 3088 |
| Klhl5         | kelch-like 5 (Drosophila)                                               | 1444486_at   | -1.23 | 0.0218   | 3089 |
| Efr3b         | EFR3 homolog B (S. cerevisiae)                                          | 1435123_at   | 1.23  | 0.0092   | 3090 |
| Plscr3        | phospholipid scramblase 3                                               | 1431081_a_at | 1.23  | 0.0310   | 3091 |
| Erb2ip        | Erb2 interacting protein                                                | 1428011_a_at | 1.23  | 0.0026   | 3092 |
| Nt5c3l        | 5'-nucleotidase, cytosolic III-like                                     | 1449633_s_at | -1.23 | 0.0111   | 3093 |
| 2410025L10Rik | RIKEN cDNA 2410025L10 gene                                              | 1439470_at   | -1.23 | 0.0118   | 3094 |
| Apbb2         | amyloid beta (A4) precursor protein-binding, family B, member 2         | 1426719_at   | 1.23  | 0.0198   | 3095 |
| 1110003E01Rik | RIKEN cDNA 1110003E01 gene                                              | 1416767_a_at | 1.23  | 0.0009   | 3096 |
| Ero1l         | ERO1-like (S. cerevisiae)                                               | 1419029_at   | 1.23  | 0.0131   | 3097 |
| Rasa2         | RAS p21 protein activator 2                                             | 1422785_at   | 1.23  | 0.0012   | 3098 |
| 1441469_at    |                                                                         | 1441469_at   | -1.23 | 0.0246   | 3099 |
| Slc4a4        | solute carrier family 4 (anion exchanger), member 4                     | 1452071_at   | -1.23 | 0.0020   | 3100 |
| Pcdh9         | protocadherin 9                                                         | 1429861_at   | -1.23 | 0.0006   | 3101 |
| Pdss2         | prenyl (solanesyl) diphosphate synthase, subunit 2                      | 1459473_at   | -1.23 | 0.0260   | 3102 |
| 1442310_at    |                                                                         | 1442310_at   | -1.23 | 0.0074   | 3103 |

|               |                                                                    |              |       |        |      |
|---------------|--------------------------------------------------------------------|--------------|-------|--------|------|
| Rg9mtd2       | RNA (guanine-9-) methyltransferase domain containing 2             | 1427375_at   | 1.23  | 0.0060 | 3104 |
| Acly          | ATP citrate lyase                                                  | 1439459_x_at | 1.23  | 0.0175 | 3105 |
| Srd5a3        | steroid 5 alpha-reductase 3                                        | 1456691_s_at | 1.23  | 0.0340 | 3106 |
| Rgnef         | Rho-guanine nucleotide exchange factor                             | 1431161_at   | -1.23 | 0.0040 | 3107 |
| Ccnc          | cyclin C                                                           | 1454144_a_at | 1.23  | 0.0315 | 3108 |
| Dusp7         | dual specificity phosphatase 7                                     | 1427416_x_at | 1.23  | 0.0398 | 3109 |
| 1454156_at    |                                                                    | 1454156_at   | -1.23 | 0.0166 | 3110 |
| Dtwd2         | DTW domain containing 2                                            | 1428901_at   | 1.23  | 0.0072 | 3111 |
| Zfp365        | zinc finger protein 365                                            | 1435615_at   | -1.23 | 0.0266 | 3112 |
| Bcl11b        | B-cell leukemia/lymphoma 11B                                       | 1438784_at   | -1.23 | 0.0107 | 3113 |
| 1459240_at    |                                                                    | 1459240_at   | 1.23  | 0.0105 | 3114 |
| Nip7          | nuclear import 7 homolog (S. cerevisiae)                           | 1453324_at   | -1.23 | 0.0092 | 3115 |
| Itga1         | integrin alpha 1                                                   | 1429543_at   | 1.23  | 0.0128 | 3116 |
| Cln6          | ceroid-lipofuscinosis, neuronal 6                                  | 1454837_at   | -1.23 | 0.0368 | 3117 |
| LOC229005     | hypothetical LOC229005                                             | 1442054_at   | -1.23 | 0.0208 | 3118 |
| Tcte2         | t-complex-associated testis expressed 2                            | 1425009_at   | 1.23  | 0.0057 | 3119 |
| Bri3          | brain protein I3                                                   | 1416924_at   | 1.23  | 0.0274 | 3120 |
| Kcnab1        | potassium voltage-gated channel, shaker-related subfamily, beta nr | 1454043_a_at | -1.23 | 0.0113 | 3121 |
| 1436237_at    |                                                                    | 1436237_at   | 1.23  | 0.0041 | 3122 |
| Pyroxd1       | pyridine nucleotide-disulphide oxidoreductase domain 1             | 1451779_at   | 1.23  | 0.0439 | 3123 |
| Mm.216743     |                                                                    | 1459630_at   | -1.23 | 0.0154 | 3124 |
| 2410022L05Rik | RIKEN cDNA 2410022L05 gene                                         | 1420113_s_at | -1.23 | 0.0070 | 3125 |
| 1439104_at    |                                                                    | 1439104_at   | 1.23  | 0.0235 | 3126 |
| AI847670      | expressed sequence AI847670                                        | 1434266_at   | 1.23  | 0.0220 | 3127 |
| Nelf          | nasal embryonic LHRH factor                                        | 1436959_x_at | -1.23 | 0.0010 | 3128 |
| Cetn2         | centrin 2                                                          | 1418579_at   | 1.23  | 0.0028 | 3129 |
| Zfp407        | zinc finger protein 407                                            | 1459998_at   | 1.23  | 0.0208 | 3130 |

|               |                                                                    |              |       |        |      |
|---------------|--------------------------------------------------------------------|--------------|-------|--------|------|
| Frem1         | Fras1 related extracellular matrix protein 1                       | 1455280_at   | -1.23 | 0.0126 | 3131 |
| Rfx7          | regulatory factor X, 7                                             | 1434521_at   | 1.23  | 0.0030 | 3132 |
| Mm.317821     |                                                                    | 1447279_at   | -1.23 | 0.0078 | 3133 |
| Gca           | granulocalcin                                                      | 1451451_at   | 1.23  | 0.0258 | 3134 |
| Gnas          | GNAS (guanine nucleotide binding protein, alpha stimulating) compl | 1443007_at   | -1.23 | 0.0012 | 3135 |
| Nedd4         | neural precursor cell expressed, developmentally down-regulated 4  | 1451109_a_at | 1.23  | 0.0011 | 3136 |
| Peli1         | pellino 1                                                          | 1417372_a_at | -1.23 | 0.0325 | 3137 |
| Mm.139167     |                                                                    | 1438570_at   | -1.23 | 0.0420 | 3138 |
|               | 3-Mar membrane-associated ring finger (C3HC4) 3                    | 1446422_at   | 1.23  | 0.0101 | 3139 |
| 5430439G13Rik | RIKEN cDNA 5430439G13 gene                                         | 1429985_at   | -1.23 | 0.0251 | 3140 |
| 1419655_at    |                                                                    | 1419655_at   | 1.23  | 0.0392 | 3141 |
| Ift80         | intraflagellar transport 80 homolog (Chlamydomonas)                | 1427568_a_at | -1.23 | 0.0390 | 3142 |
| Tsc1          | tuberous sclerosis 1                                               | 1455252_at   | 1.23  | 0.0482 | 3143 |
| 1700020C11Rik | RIKEN cDNA 1700020C11 gene                                         | 1424223_at   | -1.23 | 0.0035 | 3144 |
| Nudcd1        | NudC domain containing 1                                           | 1433547_s_at | -1.23 | 0.0019 | 3145 |
| Map4k5        | mitogen-activated protein kinase kinase kinase kinase 5            | 1427084_a_at | 1.23  | 0.0018 | 3146 |
| Stag1         | stromal antigen 1                                                  | 1459320_at   | -1.23 | 0.0092 | 3147 |
| Sbno1         | sno, strawberry notch homolog 1 (Drosophila)                       | 1451436_at   | 1.23  | 0.0213 | 3148 |
| Sort1         | sortilin 1                                                         | 1423363_at   | 1.23  | 0.0159 | 3149 |
| 1438842_at    |                                                                    | 1438842_at   | -1.23 | 0.0406 | 3150 |
| Sypl2         | synaptophysin-like 2                                               | 1449206_at   | -1.23 | 0.0061 | 3151 |
| 1428643_at    |                                                                    | 1428643_at   | 1.23  | 0.0181 | 3152 |
| Ung           | uracil DNA glycosylase                                             | 1425753_a_at | -1.23 | 0.0380 | 3153 |
| Grm8          | glutamate receptor, metabotropic 8                                 | 1421530_a_at | -1.23 | 0.0460 | 3154 |
| Fcgr2b        | Fc receptor, IgG, low affinity IIb                                 | 1435476_a_at | 1.23  | 0.0418 | 3155 |
| Grm7          | glutamate receptor, metabotropic 7                                 | 1458861_at   | 1.23  | 0.0342 | 3156 |
| 1600012H06Rik | RIKEN cDNA 1600012H06 gene                                         | 1428217_at   | 1.23  | 0.0136 | 3157 |

|               |                                                                     |              |       |        |      |
|---------------|---------------------------------------------------------------------|--------------|-------|--------|------|
| Nkain2        | Na <sup>+</sup> /K <sup>+</sup> transporting ATPase interacting 2   | 1453329_s_at | -1.23 | 0.0073 | 3158 |
| Mm.225946     |                                                                     | 1445377_at   | -1.23 | 0.0174 | 3159 |
| Ppfia4        | protein tyrosine phosphatase, receptor type, f polypeptide (PTPRF   | 1452846_at   | 1.23  | 0.0004 | 3160 |
| Dlg1          | discs, large homolog 1 (Drosophila)                                 | 1450768_at   | 1.23  | 0.0011 | 3161 |
| 1436182_at    |                                                                     | 1436182_at   | -1.23 | 0.0117 | 3162 |
| BC025920      | cDNA sequence BC025920                                              | 1436264_at   | 1.23  | 0.0292 | 3163 |
| Dhx34         | DEAH (Asp-Glu-Ala-His) box polypeptide 34                           | 1431561_a_at | 1.23  | 0.0296 | 3164 |
| 1428342_at    |                                                                     | 1428342_at   | -1.23 | 0.0469 | 3165 |
| 1437071_at    |                                                                     | 1437071_at   | -1.23 | 0.0003 | 3166 |
| Pxn           | paxillin                                                            | 1456135_s_at | 1.23  | 0.0187 | 3167 |
| Far1          | fatty acyl CoA reductase 1                                          | 1426371_at   | 1.23  | 0.0120 | 3168 |
| Lrrc58        | leucine rich repeat containing 58                                   | 1440365_at   | 1.23  | 0.0347 | 3169 |
| Tanc2         | tetratricopeptide repeat, ankyrin repeat and coiled-coil containing | 1436513_at   | 1.23  | 0.0041 | 3170 |
| Setd4         | SET domain containing 4                                             | 1425239_at   | 1.23  | 0.0002 | 3171 |
| Sri           | sorcin                                                              | 1450878_at   | -1.23 | 0.0001 | 3172 |
| 4930555I21Rik | RIKEN cDNA 4930555I21 gene                                          | 1430682_at   | -1.23 | 0.0021 | 3173 |
| Fam154b       | family with sequence similarity 154, member B                       | 1439963_x_at | -1.23 | 0.0083 | 3174 |
| LOC552874     | hypothetical LOC552874                                              | 1440973_at   | -1.23 | 0.0176 | 3175 |
| Mm.186640     |                                                                     | 1440603_at   | -1.23 | 0.0450 | 3176 |
| Krr1          | KRR1, small subunit (SSU) processome component, homolog (yeas       | 1452658_at   | 1.23  | 0.0423 | 3177 |
| Utp6          | UTP6, small subunit (SSU) processome component, homolog (yeas       | 1424500_at   | 1.23  | 0.0013 | 3178 |
| Spnb2         | spectrin beta 2                                                     | 1444089_at   | -1.23 | 0.0049 | 3179 |
| Nr6a1         | nuclear receptor subfamily 6, group A, member 1                     | 1432627_at   | 1.23  | 0.0471 | 3180 |
| Als2          | amyotrophic lateral sclerosis 2 (juvenile) homolog (human)          | 1417783_at   | -1.22 | 0.0011 | 3181 |
| Ssbp3         | single-stranded DNA binding protein 3                               | 1457560_at   | 1.22  | 0.0322 | 3182 |
| Map2k5        | mitogen-activated protein kinase kinase 5                           | 1417854_at   | -1.22 | 0.0039 | 3183 |
| 1431078_at    |                                                                     | 1431078_at   | -1.22 | 0.0059 | 3184 |

|               |                                                                      |              |       |          |      |
|---------------|----------------------------------------------------------------------|--------------|-------|----------|------|
| Vamp8         | vesicle-associated membrane protein 8                                | 1420624_a_at | 1.22  | 0.0100   | 3185 |
| Senp2         | SUMO/sentrin specific peptidase 2                                    | 1451717_s_at | 1.22  | 0.0063   | 3186 |
| Kat2b         | K(lysine) acetyltransferase 2B                                       | 1434037_s_at | 1.22  | 0.0148   | 3187 |
| Kctd13        | potassium channel tetramerisation domain containing 13               | 1434154_at   | -1.22 | 8.60E-05 | 3188 |
| Plxna2        | plexin A2                                                            | 1451753_at   | 1.22  | 0.0057   | 3189 |
| 1455031_at    |                                                                      | 1455031_at   | 1.22  | 0.0094   | 3190 |
| Dhodh         | dihydroorotate dehydrogenase                                         | 1417581_at   | -1.22 | 0.0088   | 3191 |
| Sgcg          | sarcoglycan, gamma (dystrophin-associated glycoprotein)              | 1429823_at   | -1.22 | 0.0329   | 3192 |
| Gm3246        | predicted gene 3246                                                  | 1440254_at   | -1.22 | 0.0009   | 3193 |
| Pcsk7         | proprotein convertase subtilisin/kexin type 7                        | 1417180_at   | 1.22  | 0.0023   | 3194 |
| 5930427L02Rik | RIKEN cDNA 5930427L02 gene                                           | 1445938_at   | -1.22 | 0.0230   | 3195 |
| Camk2d        | calcium/calmodulin-dependent protein kinase II, delta                | 1427763_a_at | -1.22 | 0.0476   | 3196 |
| Cap2          | CAP, adenylate cyclase-associated protein, 2 (yeast)                 | 1423222_at   | -1.22 | 0.0194   | 3197 |
| 4933428G20Rik | RIKEN cDNA 4933428G20 gene                                           | 1419745_at   | 1.22  | 0.0169   | 3198 |
| Stk10         | serine/threonine kinase 10                                           | 1417751_at   | -1.22 | 0.0014   | 3199 |
| Xiap          | X-linked inhibitor of apoptosis                                      | 1426636_a_at | -1.22 | 0.0228   | 3200 |
| Ank           | progressive ankylosis                                                | 1450627_at   | -1.22 | 0.0121   | 3201 |
| BC049349      | cDNA sequence BC049349                                               | 1434296_at   | -1.22 | 0.0185   | 3202 |
| Snhg10        | small nucleolar RNA host gene (non-protein coding) 10                | 1447993_a_at | -1.22 | 0.0206   | 3203 |
| 4833422B07Rik | RIKEN cDNA 4833422B07 gene                                           | 1454299_at   | 1.22  | 0.0055   | 3204 |
| Arsb          | arylsulfatase B                                                      | 1429189_at   | -1.22 | 0.0098   | 3205 |
| Slc4a11       | solute carrier family 4, sodium bicarbonate transporter-like, member | 1434867_at   | 1.22  | 0.0401   | 3206 |
| Dmtf1         | cyclin D binding myb-like transcription factor 1                     | 1422636_at   | 1.22  | 0.0029   | 3207 |
| Slc4a7        | solute carrier family 4, sodium bicarbonate cotransporter, member    | 1438673_at   | -1.22 | 0.0139   | 3208 |
| Mm.354954     |                                                                      | 1443996_at   | -1.22 | 0.0117   | 3209 |
| Pofut1        | protein O-fucosyltransferase 1                                       | 1443881_at   | -1.22 | 0.0097   | 3210 |
| 1427112_at    |                                                                      | 1427112_at   | 1.22  | 0.0090   | 3211 |

|               |                                                                     |              |       |          |      |
|---------------|---------------------------------------------------------------------|--------------|-------|----------|------|
| Enpp1         | ectonucleotide pyrophosphatase/phosphodiesterase 1                  | 1459546_s_at | 1.22  | 0.0044   | 3212 |
| Sgpl1         | sphingosine phosphate lyase 1                                       | 1415892_at   | 1.22  | 0.0415   | 3213 |
| C030040A22Rik | RIKEN cDNA C030040A22 gene                                          | 1444353_at   | 1.22  | 0.0017   | 3214 |
| Gad1          | glutamic acid decarboxylase 1                                       | 1416562_at   | -1.22 | 0.0011   | 3215 |
| Scaper        | S phase cyclin A-associated protein in the ER                       | 1435930_at   | -1.22 | 0.0103   | 3216 |
| Syt7          | synaptotagmin VII                                                   | 1423012_at   | 1.22  | 0.0108   | 3217 |
| Aak1          | AP2 associated kinase 1                                             | 1441782_at   | 1.22  | 0.0069   | 3218 |
| 9330154F10Rik | RIKEN cDNA 9330154F10 gene                                          | 1433324_at   | 1.22  | 0.0463   | 3219 |
| Cln8          | ceroid-lipofuscinosis, neuronal 8                                   | 1455745_at   | 1.22  | 0.0004   | 3220 |
| Mll5          | myeloid/lymphoid or mixed-lineage leukemia 5                        | 1439107_a_at | 1.22  | 0.0230   | 3221 |
| 1453790_at    |                                                                     | 1453790_at   | 1.22  | 0.0057   | 3222 |
| BB388769      |                                                                     | 1444939_at   | -1.22 | 0.0180   | 3223 |
| Rgs19         | regulator of G-protein signaling 19                                 | 1417786_a_at | -1.22 | 0.0208   | 3224 |
| Eef1a2        | eukaryotic translation elongation factor 1 alpha 2                  | 1455690_at   | 1.22  | 0.0142   | 3225 |
| Cadps2        | Ca <sup>2+</sup> -dependent activator protein for secretion 2       | 1451499_at   | -1.22 | 0.0454   | 3226 |
| Lzts2         | leucine zipper, putative tumor suppressor 2                         | 1426409_at   | -1.22 | 0.0004   | 3227 |
| Cnksr2        | connector enhancer of kinase suppressor of Ras 2                    | 1445194_at   | 1.22  | 0.0010   | 3228 |
| 5930430L01Rik | RIKEN cDNA 5930430L01 gene                                          | 1441048_at   | -1.22 | 0.0083   | 3229 |
| Usp53         | ubiquitin specific peptidase 53                                     | 1458899_at   | 1.22  | 0.0160   | 3230 |
| 1454613_at    |                                                                     | 1454613_at   | 1.22  | 0.0071   | 3231 |
| Pip4k2a       | phosphatidylinositol-5-phosphate 4-kinase, type II, alpha           | 1449404_at   | -1.22 | 7.70E-05 | 3232 |
| Map1lc3a      | microtubule-associated protein 1 light chain 3 alpha                | 1447883_x_at | 1.22  | 0.0280   | 3233 |
| 1429693_at    |                                                                     | 1429693_at   | 1.22  | 0.0166   | 3234 |
| Gga2          | golgi associated, gamma adaptin ear containing, ARF binding protein | 1428141_at   | 1.22  | 0.0058   | 3235 |
| Thumpd3       | THUMP domain containing 3                                           | 1417684_at   | -1.22 | 1.40E-05 | 3236 |
| Gpr34         | G protein-coupled receptor 34                                       | 1445152_at   | 1.22  | 0.0358   | 3237 |
| Fam114a2      | family with sequence similarity 114, member A2                      | 1451283_at   | -1.22 | 0.0010   | 3238 |



|               |                                                                 |              |       |          |      |
|---------------|-----------------------------------------------------------------|--------------|-------|----------|------|
| Cdh2          | cadherin 2                                                      | 1449244_at   | -1.22 | 0.0006   | 3239 |
| Ckap4         | cytoskeleton-associated protein 4                               | 1426755_at   | 1.22  | 0.0430   | 3240 |
| Kcne4         | potassium voltage-gated channel, Isk-related subfamily, gene 4  | 1418156_at   | 1.22  | 0.0195   | 3241 |
| Tmed2         | transmembrane emp24 domain trafficking protein 2                | 1420868_s_at | 1.22  | 0.0056   | 3242 |
| D930002L09Rik | RIKEN cDNA D930002L09 gene                                      | 1444452_at   | -1.22 | 0.0300   | 3243 |
| 1437400_at    |                                                                 | 1437400_at   | -1.22 | 0.0021   | 3244 |
| Pptc7         | PTC7 protein phosphatase homolog ( <i>S. cerevisiae</i> )       | 1455958_s_at | -1.22 | 0.0005   | 3245 |
| Epb4.9        | erythrocyte protein band 4.9                                    | 1460223_a_at | 1.22  | 0.0305   | 3246 |
| Stam2         | signal transducing adaptor molecule (SH3 domain and ITAM motif) | 1442673_at   | 1.22  | 0.0174   | 3247 |
| Emb           | embigin                                                         | 1415857_at   | 1.22  | 0.0029   | 3248 |
| Nacc2         | nucleus accumbens associated 2, BEN and BTB (POZ) domain con    | 1417152_at   | 1.22  | 0.0003   | 3249 |
| BG085060      |                                                                 | 1459035_at   | 1.22  | 0.0254   | 3250 |
| Kctd10        | potassium channel tetramerisation domain containing 10          | 1450543_at   | -1.22 | 0.0362   | 3251 |
| Pcdhb9        | protocadherin beta 9                                            | 1422640_at   | 1.22  | 0.0051   | 3252 |
| Wscd1         | WSC domain containing 1                                         | 1455845_at   | -1.22 | 9.30E-06 | 3253 |
| Zbtb7a        | zinc finger and BTB domain containing 7a                        | 1452932_at   | 1.22  | 0.0467   | 3254 |
| Lst1          | leukocyte specific transcript 1                                 | 1425548_a_at | 1.22  | 0.0466   | 3255 |
| 1422882_at    |                                                                 | 1422882_at   | -1.22 | 0.0156   | 3256 |
| FrmD8         | FERM domain containing 8                                        | 1432848_a_at | 1.22  | 0.0057   | 3257 |
| Arhgef4       | Rho guanine nucleotide exchange factor (GEF) 4                  | 1435033_at   | -1.22 | 0.0011   | 3258 |
| Abcb4         | ATP-binding cassette, sub-family B (MDR/TAP), member 4          | 1449818_at   | -1.22 | 0.0354   | 3259 |
| MyI9          | myosin, light polypeptide 9, regulatory                         | 1452670_at   | 1.22  | 0.0126   | 3260 |
| Rock2         | Rho-associated coiled-coil containing protein kinase 2          | 1423592_at   | 1.22  | 0.0010   | 3261 |
| A930005I04Rik | RIKEN cDNA A930005I04 gene                                      | 1443531_at   | -1.22 | 0.0084   | 3262 |
| Polr2a        | polymerase (RNA) II (DNA directed) polypeptide A                | 1426242_at   | 1.22  | 0.0348   | 3263 |
| Arhgef18      | rho/rac guanine nucleotide exchange factor (GEF) 18             | 1418553_at   | 1.22  | 0.0038   | 3264 |
| BG068793      |                                                                 | 1444338_at   | 1.22  | 0.0265   | 3265 |

|               |                                                           |              |       |        |      |
|---------------|-----------------------------------------------------------|--------------|-------|--------|------|
| Stim2         | stromal interaction molecule 2                            | 1434219_at   | 1.22  | 0.0094 | 3266 |
| AA153229      |                                                           | 1442120_at   | -1.22 | 0.0133 | 3267 |
| 1439697_at    |                                                           | 1439697_at   | -1.22 | 0.0036 | 3268 |
| Gata2         | GATA binding protein 2                                    | 1450333_a_at | 1.22  | 0.0015 | 3269 |
| Ablim2        | actin-binding LIM protein 2                               | 1455313_at   | 1.22  | 0.0460 | 3270 |
| Ift122        | intraflagellar transport 122 homolog (Chlamydomonas)      | 1441259_s_at | -1.22 | 0.0205 | 3271 |
| Mm.395027     |                                                           | 1435119_at   | -1.22 | 0.0319 | 3272 |
| BB041897      |                                                           | 1432570_at   | -1.22 | 0.0243 | 3273 |
| Akap9         | A kinase (PRKA) anchor protein (yotiao) 9                 | 1447912_x_at | 1.22  | 0.0416 | 3274 |
| Sdhaf1        | succinate dehydrogenase complex assembly factor 1         | 1433936_at   | -1.22 | 0.0198 | 3275 |
| Mmp17         | matrix metalloproteinase 17                               | 1448598_at   | -1.22 | 0.0049 | 3276 |
| 2610507I01Rik | RIKEN cDNA 2610507I01 gene                                | 1431141_at   | -1.22 | 0.0039 | 3277 |
| 1420295_x_at  |                                                           | 1420295_x_at | 1.22  | 0.0053 | 3278 |
| Spsb1         | splA/ryanodine receptor domain and SOCS box containing 1  | 1449752_at   | 1.22  | 0.0355 | 3279 |
| Gpr61         | G protein-coupled receptor 61                             | 1436972_at   | -1.22 | 0.0188 | 3280 |
| D5Buc30e      | DNA segment, Chr 5, Bucan 30 expressed                    | 1443205_at   | -1.22 | 0.0427 | 3281 |
| Tbc1d14       | TBC1 domain family, member 14                             | 1420196_s_at | -1.22 | 0.0098 | 3282 |
| P2rx4         | purinergic receptor P2X, ligand-gated ion channel 4       | 1425525_a_at | 1.22  | 0.0036 | 3283 |
| Pip4k2a       | phosphatidylinositol-5-phosphate 4-kinase, type II, alpha | 1419279_at   | -1.22 | 0.0008 | 3284 |
| Gm16039       | predicted gene 16039                                      | 1428603_at   | 1.22  | 0.0011 | 3285 |
| Ccdc74a       | coiled-coil domain containing 74A                         | 1455568_at   | -1.22 | 0.0015 | 3286 |
| 1428288_at    |                                                           | 1428288_at   | 1.22  | 0.0001 | 3287 |
| Klhl8         | kelch-like 8 (Drosophila)                                 | 1433526_at   | -1.22 | 0.0290 | 3288 |
| Nnt           | nicotinamide nucleotide transhydrogenase                  | 1416105_at   | -1.22 | 0.0029 | 3289 |
| Foxk1         | forkhead box K1                                           | 1421759_a_at | -1.22 | 0.0214 | 3290 |
| Ccdc74a       | coiled-coil domain containing 74A                         | 1436106_x_at | -1.22 | 0.0254 | 3291 |
| Nub1          | negative regulator of ubiquitin-like proteins 1           | 1428439_at   | 1.22  | 0.0050 | 3292 |

|               |                                                                   |              |       |        |      |
|---------------|-------------------------------------------------------------------|--------------|-------|--------|------|
| Pabpc1l       | poly(A) binding protein, cytoplasmic 1-like                       | 1439913_at   | 1.22  | 0.0223 | 3293 |
| Atp2a3        | ATPase, Ca <sup>++</sup> transporting, ubiquitous                 | 1421129_a_at | 1.22  | 0.0004 | 3294 |
| Dab1          | disabled homolog 1 (Drosophila)                                   | 1435577_at   | -1.22 | 0.0328 | 3295 |
| Dgcr8         | DiGeorge syndrome critical region gene 8                          | 1422981_at   | 1.22  | 0.0471 | 3296 |
| Mm.197126     |                                                                   | 1443219_at   | -1.22 | 0.0489 | 3297 |
| Tmeff1        | transmembrane protein with EGF-like and two follistatin-like doma | 1426649_at   | -1.22 | 0.0225 | 3298 |
| Baiap2        | brain-specific angiogenesis inhibitor 1-associated protein 2      | 1435128_at   | 1.22  | 0.0195 | 3299 |
| 1444709_at    |                                                                   | 1444709_at   | -1.22 | 0.0428 | 3300 |
| Pou3f3        | POU domain, class 3, transcription factor 3                       | 1435197_at   | -1.22 | 0.0290 | 3301 |
| Cspp1         | centrosome and spindle pole associated protein 1                  | 1454989_at   | -1.22 | 0.0099 | 3302 |
| Pdpk1         | 3-phosphoinositide dependent protein kinase-1                     | 1416501_at   | 1.22  | 0.0009 | 3303 |
| Mlf1ip        | myeloid leukemia factor 1 interacting protein                     | 1452816_at   | -1.22 | 0.0487 | 3304 |
| 1459210_at    |                                                                   | 1459210_at   | 1.22  | 0.0417 | 3305 |
| Fam13b        | family with sequence similarity 13, member B                      | 1434620_s_at | -1.22 | 0.0084 | 3306 |
| Bnip2         | BCL2/adenovirus E1B interacting protein 2                         | 1422490_at   | 1.22  | 0.0012 | 3307 |
| Fam55d        | family with sequence similarity 55, member D                      | 1456111_at   | 1.22  | 0.0136 | 3308 |
| 1433319_at    |                                                                   | 1433319_at   | -1.22 | 0.0206 | 3309 |
| Mtmr3         | myotubularin related protein 3                                    | 1427117_at   | 1.22  | 0.0211 | 3310 |
| Syt7          | synaptotagmin VII                                                 | 1441927_at   | 1.22  | 0.0045 | 3311 |
| Parp14        | poly (ADP-ribose) polymerase family, member 14                    | 1432548_at   | 1.22  | 0.0109 | 3312 |
| Bex1          | brain expressed gene 1                                            | 1448595_a_at | -1.22 | 0.0141 | 3313 |
| Igfbp5        | insulin-like growth factor binding protein 5                      | 1422313_a_at | -1.22 | 0.0066 | 3314 |
| 1110003E01Rik | RIKEN cDNA 1110003E01 gene                                        | 1416768_at   | 1.22  | 0.0012 | 3315 |
| Zfp160        | zinc finger protein 160                                           | 1439073_at   | 1.22  | 0.0389 | 3316 |
| Fzd5          | frizzled homolog 5 (Drosophila)                                   | 1430809_at   | -1.22 | 0.0137 | 3317 |
| Npas1         | neuronal PAS domain protein 1                                     | 1420801_at   | 1.22  | 0.0058 | 3318 |
| Cks2          | CDC28 protein kinase regulatory subunit 2                         | 1417457_at   | 1.22  | 0.0176 | 3319 |

|              |                                                                                         |              |       |          |      |
|--------------|-----------------------------------------------------------------------------------------|--------------|-------|----------|------|
| 1423563_at   |                                                                                         | 1423563_at   | -1.22 | 0.0012   | 3320 |
| Sept11       | septin 11                                                                               | 1429234_s_at | 1.22  | 0.0085   | 3321 |
| Amotl1       | angiomin-1-like 1                                                                       | 1428785_at   | 1.22  | 0.0087   | 3322 |
| 1424563_at   |                                                                                         | 1424563_at   | 1.22  | 0.0028   | 3323 |
| Timp3        | tissue inhibitor of metalloproteinase 3                                                 | 1419088_at   | 1.22  | 0.0466   | 3324 |
| Dnase1l3     | deoxyribonuclease 1-like 3                                                              | 1421057_at   | 1.22  | 0.0016   | 3325 |
| BB807463     |                                                                                         | 1441754_at   | -1.22 | 0.0109   | 3326 |
| Rilpl1       | Rab interacting lysosomal protein-like 1                                                | 1438438_at   | 1.22  | 0.0075   | 3327 |
| Leprel2      | leprecan-like 2                                                                         | 1449531_at   | 1.22  | 0.0344   | 3328 |
| Diap1        | diaphanous homolog 1 (Drosophila)                                                       | 1421143_at   | -1.22 | 0.0127   | 3329 |
| Pkia         | protein kinase inhibitor, alpha                                                         | 1420858_at   | 1.22  | 0.0094   | 3330 |
| Ccl17        | chemokine (C-C motif) ligand 17                                                         | 1419413_at   | 1.22  | 0.0252   | 3331 |
| Cmtm7        | CKLF-like MARVEL transmembrane domain containing 7                                      | 1460253_at   | 1.22  | 0.0180   | 3332 |
| BB337886     |                                                                                         | 1440807_at   | 1.22  | 0.0356   | 3333 |
| Ckap4        | cytoskeleton-associated protein 4                                                       | 1455019_x_at | 1.22  | 0.0322   | 3334 |
| Atp2c1       | ATPase, Ca <sup>++</sup> -sequestering                                                  | 1437738_at   | -1.22 | 1.20E-05 | 3335 |
| Fbxw17       | F-box and WD-40 domain protein 17                                                       | 1434991_at   | -1.22 | 0.0474   | 3336 |
| 1419355_at   |                                                                                         | 1419355_at   | 1.22  | 0.0124   | 3337 |
| Clstn2       | calsyntenin 2                                                                           | 1441165_s_at | 1.22  | 0.0106   | 3338 |
| Mm.226989    |                                                                                         | 1440516_at   | -1.22 | 0.0269   | 3339 |
| 1429435_x_at |                                                                                         | 1429435_x_at | 1.22  | 0.0214   | 3340 |
| Skap2        | src family associated phosphoprotein 2                                                  | 1418895_at   | 1.22  | 0.0430   | 3341 |
| St6galnac5   | ST6 (alpha-N-acetylneuraminyl-2,3-beta-galactosyl-1,3)-N-acetylglucosaminyl-6-sulfatase | 1449468_at   | -1.22 | 0.0040   | 3342 |
| 1426420_at   |                                                                                         | 1426420_at   | 1.22  | 0.0305   | 3343 |
| Fam57b       | family with sequence similarity 57, member B                                            | 1452806_at   | -1.22 | 0.0224   | 3344 |
| Trim59       | tripartite motif-containing 59                                                          | 1431430_s_at | -1.22 | 0.0257   | 3345 |
| Pik3cb       | phosphatidylinositol 3-kinase, catalytic, beta polypeptide                              | 1445731_at   | -1.22 | 0.0499   | 3346 |

|               |                                                         |              |       |        |      |
|---------------|---------------------------------------------------------|--------------|-------|--------|------|
| 1434953_at    |                                                         | 1434953_at   | -1.22 | 0.0109 | 3347 |
| 1436925_at    |                                                         | 1436925_at   | -1.22 | 0.0007 | 3348 |
| BB431279      |                                                         | 1446350_at   | -1.22 | 0.0305 | 3349 |
| Bzrap1        | benzodiazapine receptor associated protein 1            | 1455771_at   | 1.22  | 0.0049 | 3350 |
| BB435965      |                                                         | 1447906_at   | -1.22 | 0.0411 | 3351 |
| Serac1        | serine active site containing 1                         | 1440936_at   | -1.22 | 0.0283 | 3352 |
| 1437776_at    |                                                         | 1437776_at   | 1.22  | 0.0253 | 3353 |
| Gprc5b        | G protein-coupled receptor, family C, group 5, member B | 1451411_at   | 1.22  | 0.0012 | 3354 |
| Arntl         | aryl hydrocarbon receptor nuclear translocator-like     | 1425099_a_at | -1.21 | 0.0256 | 3355 |
| Dpm1          | dolichol-phosphate (beta-D) mannosyltransferase 1       | 1419353_at   | 1.22  | 0.0071 | 3356 |
| Ncald         | neurocalcin delta                                       | 1417569_at   | -1.21 | 0.0086 | 3357 |
| C530014P21Rik | RIKEN cDNA C530014P21 gene                              | 1441577_at   | -1.21 | 0.0145 | 3358 |
| 1421096_at    |                                                         | 1421096_at   | -1.21 | 0.0020 | 3359 |
| Gsdma2        | gasdermin A2                                            | 1432141_x_at | 1.21  | 0.0123 | 3360 |
| Ebf2          | early B-cell factor 2                                   | 1418494_at   | -1.21 | 0.0275 | 3361 |
| Fam100b       | family with sequence similarity 100, member B           | 1436747_at   | -1.21 | 0.0348 | 3362 |
| Zfp407        | zinc finger protein 407                                 | 1458094_at   | 1.21  | 0.0022 | 3363 |
| Ssbp2         | single-stranded DNA binding protein 2                   | 1449815_a_at | -1.21 | 0.0003 | 3364 |
| 1459895_at    |                                                         | 1459895_at   | -1.21 | 0.0359 | 3365 |
| Gatad1        | GATA zinc finger domain containing 1                    | 1425599_a_at | 1.21  | 0.0098 | 3366 |
| C030044B11Rik | RIKEN cDNA C030044B11 gene                              | 1429264_at   | -1.21 | 0.0044 | 3367 |
| Slc38a10      | solute carrier family 38, member 10                     | 1427294_a_at | 1.21  | 0.0086 | 3368 |
| 1454090_at    |                                                         | 1454090_at   | 1.21  | 0.0277 | 3369 |
| 1419499_at    |                                                         | 1419499_at   | 1.21  | 0.0174 | 3370 |
| Jph4          | junctionophilin 4                                       | 1439031_at   | -1.21 | 0.0343 | 3371 |
| Zfhx3         | zinc finger homeobox 3                                  | 1449947_s_at | 1.21  | 0.0045 | 3372 |
| Gpr64         | G protein-coupled receptor 64                           | 1438350_at   | 1.21  | 0.0393 | 3373 |

|               |                                                          |              |       |          |      |
|---------------|----------------------------------------------------------|--------------|-------|----------|------|
| Lamp2         | lysosomal-associated membrane protein 2                  | 1428094_at   | 1.21  | 0.0022   | 3374 |
| Mpg           | N-methylpurine-DNA glycosylase                           | 1417571_at   | -1.21 | 0.0021   | 3375 |
| Kras          | v-Ki-ras2 Kirsten rat sarcoma viral oncogene homolog     | 1434000_at   | 1.21  | 0.0005   | 3376 |
| Cd200         | CD200 antigen                                            | 1448788_at   | 1.21  | 0.0034   | 3377 |
| Ascl1         | achaete-scute complex homolog 1 (Drosophila)             | 1450164_at   | -1.21 | 0.0273   | 3378 |
| Nfxl1         | nuclear transcription factor, X-box binding-like 1       | 1417145_at   | -1.21 | 0.0139   | 3379 |
| Scn2b         | sodium channel, voltage-gated, type II, beta             | 1430648_at   | -1.21 | 0.0083   | 3380 |
| Bmp5          | bone morphogenetic protein 5                             | 1421283_at   | 1.21  | 0.0310   | 3381 |
| Atg12         | autophagy-related 12 (yeast)                             | 1451746_a_at | 1.21  | 0.0108   | 3382 |
| Hr            | hairless                                                 | 1435950_at   | 1.21  | 0.0460   | 3383 |
| Ppp1r7        | protein phosphatase 1, regulatory (inhibitor) subunit 7  | 1448888_at   | -1.21 | 4.90E-05 | 3384 |
| Habp4         | hyaluronic acid binding protein 4                        | 1418927_a_at | 1.21  | 0.0178   | 3385 |
| Peg3          | paternally expressed 3                                   | 1433924_at   | 1.21  | 0.0369   | 3386 |
| BM198618      |                                                          | 1446736_at   | 1.21  | 0.0212   | 3387 |
| Klf6          | Kruppel-like factor 6                                    | 1427742_a_at | 1.21  | 0.0002   | 3388 |
| 0610011F06Rik | RIKEN cDNA 0610011F06 gene                               | 1431126_a_at | -1.21 | 0.0478   | 3389 |
| Trim35        | tripartite motif-containing 35                           | 1425621_at   | 1.21  | 0.0245   | 3390 |
| 1444355_at    |                                                          | 1444355_at   | 1.21  | 0.0197   | 3391 |
| 4931406P16Rik | RIKEN cDNA 4931406P16 gene                               | 1433994_at   | 1.21  | 0.0348   | 3392 |
| Gng12         | guanine nucleotide binding protein (G protein), gamma 12 | 1455089_at   | -1.21 | 0.0030   | 3393 |
| 6430514M23Rik | RIKEN cDNA 6430514M23 gene                               | 1436492_x_at | 1.21  | 0.0483   | 3394 |
| Hn1           | hematological and neurological expressed sequence 1      | 1448180_a_at | 1.21  | 0.0194   | 3395 |
| Ube3a         | ubiquitin protein ligase E3A                             | 1416681_at   | 1.21  | 0.0142   | 3396 |
| 1430610_at    |                                                          | 1430610_at   | 1.21  | 0.0234   | 3397 |
| Npdc1         | neural proliferation, differentiation and control gene 1 | 1415919_at   | 1.21  | 8.10E-05 | 3398 |
| Socs5         | suppressor of cytokine signaling 5                       | 1423350_at   | 1.21  | 2.50E-05 | 3399 |
| Rfc1          | replication factor C (activator 1) 1                     | 1418342_at   | -1.21 | 0.0224   | 3400 |

|               |                                                             |              |       |        |      |
|---------------|-------------------------------------------------------------|--------------|-------|--------|------|
| 1459889_at    |                                                             | 1459889_at   | 1.21  | 0.0009 | 3401 |
| Prrx2         | paired related homeobox 2                                   | 1432331_a_at | 1.21  | 0.0125 | 3402 |
| Gria4         | glutamate receptor, ionotropic, AMPA4 (alpha 4)             | 1458230_at   | -1.21 | 0.0477 | 3403 |
| Slco5a1       | solute carrier organic anion transporter family, member 5A1 | 1439588_at   | 1.21  | 0.0190 | 3404 |
| 1435399_at    |                                                             | 1435399_at   | 1.21  | 0.0032 | 3405 |
| Rab6b         | RAB6B, member RAS oncogene family                           | 1455924_at   | 1.21  | 0.0291 | 3406 |
| 2810416G20Rik | RIKEN cDNA 2810416G20 gene                                  | 1431220_at   | -1.21 | 0.0494 | 3407 |
| Rpap2         | RNA polymerase II associated protein 2                      | 1443182_at   | -1.21 | 0.0122 | 3408 |
| Tm9sf3        | transmembrane 9 superfamily member 3                        | 1460186_at   | 1.21  | 0.0091 | 3409 |
| Wfs1          | Wolfram syndrome 1 homolog (human)                          | 1448411_at   | -1.21 | 0.0129 | 3410 |
| Mm.384054     |                                                             | 1435144_at   | 1.21  | 0.0483 | 3411 |
| Ano6          | anoctamin 6                                                 | 1430940_at   | -1.21 | 0.0040 | 3412 |
| Fndc3b        | fibronectin type III domain containing 3B                   | 1433833_at   | 1.21  | 0.0026 | 3413 |
| Mpzl1         | myelin protein zero-like 1                                  | 1428167_a_at | -1.21 | 0.0432 | 3414 |
| A230067G21Rik | RIKEN cDNA A230067G21 gene                                  | 1443095_at   | -1.21 | 0.0305 | 3415 |
| Laptm4b       | lysosomal-associated protein transmembrane 4B               | 1436915_x_at | -1.21 | 0.0081 | 3416 |
| Klf9          | Kruppel-like factor 9                                       | 1456341_a_at | 1.21  | 0.0001 | 3417 |
| Psmg2         | proteasome (prosome, macropain) assembly chaperone 2        | 1448212_at   | -1.21 | 0.0043 | 3418 |
| Ggt6          | gamma-glutamyltransferase 6                                 | 1453587_at   | -1.21 | 0.0276 | 3419 |
| Thap1         | THAP domain containing, apoptosis associated protein 1      | 1429282_at   | 1.21  | 0.0020 | 3420 |
| Usp48         | ubiquitin specific peptidase 48                             | 1419278_at   | 1.21  | 0.0035 | 3421 |
| Nol8          | nucleolar protein 8                                         | 1428950_s_at | -1.21 | 0.0439 | 3422 |
| Cdkn2aipnl    | CDKN2A interacting protein N-terminal like                  | 1440715_s_at | -1.21 | 0.0428 | 3423 |
| She           | src homology 2 domain-containing transforming protein E     | 1457094_at   | 1.21  | 0.0075 | 3424 |
| Rg9mtd2       | RNA (guanine-9-) methyltransferase domain containing 2      | 1435035_at   | 1.21  | 0.0152 | 3425 |
| 1459875_x_at  |                                                             | 1459875_x_at | -1.21 | 0.0075 | 3426 |
| A2ld1         | AIG2-like domain 1                                          | 1451562_at   | -1.21 | 0.0121 | 3427 |

|               |                                                                      |              |       |          |      |
|---------------|----------------------------------------------------------------------|--------------|-------|----------|------|
| C730029A08Rik | RIKEN cDNA C730029A08 gene                                           | 1436169_at   | 1.21  | 0.0005   | 3428 |
| BQ175263      |                                                                      | 1434536_at   | -1.21 | 0.0431   | 3429 |
| Svip          | small VCP/p97-interacting protein                                    | 1429146_at   | -1.21 | 0.0151   | 3430 |
| Ifi2711       | interferon, alpha-inducible protein 27 like 1                        | 1452956_a_at | 1.21  | 0.0259   | 3431 |
| Sox5          | SRY-box containing gene 5                                            | 1432189_a_at | -1.21 | 0.0223   | 3432 |
| Kcnn2         | potassium intermediate/small conductance calcium-activated char      | 1448927_at   | 1.21  | 4.40E-05 | 3433 |
| 1456344_at    |                                                                      | 1456344_at   | -1.21 | 0.0258   | 3434 |
| Gm9925        | predicted gene 9925                                                  | 1446217_at   | 1.21  | 0.0477   | 3435 |
| 4933404O12Rik | RIKEN cDNA 4933404O12 gene                                           | 1435827_at   | -1.21 | 0.0166   | 3436 |
| Fam5c         | family with sequence similarity 5, member C                          | 1434993_at   | -1.21 | 0.0280   | 3437 |
| Cyb5r3        | cytochrome b5 reductase 3                                            | 1422185_a_at | 1.21  | 0.0228   | 3438 |
| Dnajb4        | DnaJ (Hsp40) homolog, subfamily B, member 4                          | 1451177_at   | 1.21  | 0.0031   | 3439 |
| Dixdc1        | DIX domain containing 1                                              | 1443957_at   | 1.21  | 0.0120   | 3440 |
| Kdelc2        | KDEL (Lys-Asp-Glu-Leu) containing 2                                  | 1453071_s_at | -1.21 | 0.0317   | 3441 |
| Usp42         | ubiquitin specific peptidase 42                                      | 1434782_at   | 1.21  | 0.0106   | 3442 |
| Atp6v1g1      | ATPase, H <sup>+</sup> transporting, lysosomal V1 subunit G1         | 1423256_a_at | 1.21  | 4.50E-06 | 3443 |
| Slc2a10       | solute carrier family 2 (facilitated glucose transporter), member 10 | 1419434_at   | 1.21  | 0.0455   | 3444 |
| 1436042_at    |                                                                      | 1436042_at   | 1.21  | 0.0145   | 3445 |
| 3830417A13Rik | RIKEN cDNA 3830417A13 gene                                           | 1430162_at   | 1.21  | 0.0251   | 3446 |
| Neb           | nebulin                                                              | 1435355_at   | 1.21  | 0.0055   | 3447 |
| Ahsa2         | AHA1, activator of heat shock protein ATPase homolog 2 (yeast)       | 1435160_at   | -1.21 | 0.0021   | 3448 |
| BC023882      | cDNA sequence BC023882                                               | 1423919_at   | 1.21  | 0.0098   | 3449 |
| Hdlbp         | high density lipoprotein (HDL) binding protein                       | 1415987_at   | 1.21  | 0.0239   | 3450 |
| Kcnd2         | potassium voltage-gated channel, Shal-related family, member 2       | 1422835_at   | -1.21 | 0.0094   | 3451 |
| Pvrl1         | poliovirus receptor-related 1                                        | 1438421_at   | 1.21  | 0.0083   | 3452 |
| 1455257_at    |                                                                      | 1455257_at   | -1.21 | 0.0114   | 3453 |
| Zfp521        | zinc finger protein 521                                              | 1442709_at   | 1.21  | 0.0421   | 3454 |



|            |                                                                          |              |       |        |      |
|------------|--------------------------------------------------------------------------|--------------|-------|--------|------|
| Csf2ra     | colony stimulating factor 2 receptor, alpha, low-affinity (granulocyt    | 1420703_at   | -1.21 | 0.0034 | 3455 |
| AW551984   | expressed sequence AW551984                                              | 1433435_at   | 1.21  | 0.0234 | 3456 |
| Mm.445823  |                                                                          | 1443107_at   | -1.21 | 0.0145 | 3457 |
| Med1       | mediator complex subunit 1                                               | 1450402_at   | 1.21  | 0.0220 | 3458 |
| Cryl1      | crystallin, lambda 1                                                     | 1447112_s_at | -1.21 | 0.0029 | 3459 |
| Trim27     | tripartite motif-containing 27                                           | 1457051_at   | -1.21 | 0.0012 | 3460 |
| Mib1       | mindbomb homolog 1 (Drosophila)                                          | 1451818_at   | 1.21  | 0.0261 | 3461 |
| Aifm1      | apoptosis-inducing factor, mitochondrion-associated 1                    | 1418127_a_at | -1.21 | 0.0001 | 3462 |
| AI592278   |                                                                          | 1444588_at   | -1.21 | 0.0110 | 3463 |
| AV024133   |                                                                          | 1436785_a_at | -1.21 | 0.0006 | 3464 |
| Fam107a    | family with sequence similarity 107, member A                            | 1434203_at   | 1.21  | 0.0041 | 3465 |
| 1441417_at |                                                                          | 1441417_at   | 1.21  | 0.0081 | 3466 |
| BG075658   |                                                                          | 1445002_at   | -1.21 | 0.0107 | 3467 |
| Tbc1d20    | TBC1 domain family, member 20                                            | 1426644_at   | -1.21 | 0.0155 | 3468 |
| Creld2     | cysteine-rich with EGF-like domains 2                                    | 1452754_at   | 1.21  | 0.0037 | 3469 |
| Atp1b2     | ATPase, Na <sup>+</sup> /K <sup>+</sup> transporting, beta 2 polypeptide | 1422009_at   | 1.21  | 0.0269 | 3470 |
| Slc9a6     | solute carrier family 9 (sodium/hydrogen exchanger), member 6            | 1435009_at   | 1.21  | 0.0445 | 3471 |
| 1426684_at |                                                                          | 1426684_at   | 1.21  | 0.0124 | 3472 |
| Dctpp1     | dCTP pyrophosphatase 1                                                   | 1416439_at   | 1.21  | 0.0066 | 3473 |
| AV158652   |                                                                          | 1445708_x_at | -1.21 | 0.0097 | 3474 |
| Agbl4      | ATP/GTP binding protein-like 4                                           | 1454259_s_at | -1.21 | 0.0097 | 3475 |
| BC005624   | cDNA sequence BC005624                                                   | 1423789_at   | 1.21  | 0.0026 | 3476 |
| Pde9a      | phosphodiesterase 9A                                                     | 1449403_at   | 1.21  | 0.0357 | 3477 |
| Sp4        | trans-acting transcription factor 4                                      | 1437508_at   | 1.21  | 0.0333 | 3478 |
| Tmc7       | transmembrane channel-like gene family 7                                 | 1456981_at   | -1.21 | 0.0260 | 3479 |
| Pam        | peptidylglycine alpha-amidating monooxygenase                            | 1418908_at   | -1.21 | 0.0162 | 3480 |
| Mm.348254  |                                                                          | 1441270_at   | -1.21 | 0.0148 | 3481 |

|            |                                                                     |              |       |        |      |
|------------|---------------------------------------------------------------------|--------------|-------|--------|------|
| Tnpo1      | transportin 1                                                       | 1455043_at   | 1.21  | 0.0053 | 3482 |
| Ppapdc1b   | phosphatidic acid phosphatase type 2 domain containing 1B           | 1457630_at   | 1.21  | 0.0403 | 3483 |
| Ppat       | phosphoribosyl pyrophosphate amidotransferase                       | 1452831_s_at | -1.21 | 0.0291 | 3484 |
| Atp8a1     | ATPase, aminophospholipid transporter (APLT), class I, type 8A, m   | 1433965_at   | 1.21  | 0.0244 | 3485 |
| Kcnn1      | potassium intermediate/small conductance calcium-activated char     | 1419617_at   | 1.21  | 0.0094 | 3486 |
| Mm.100995  |                                                                     | 1439011_at   | -1.21 | 0.0194 | 3487 |
| Efs        | embryonal Fyn-associated substrate                                  | 1438114_x_at | -1.21 | 0.0393 | 3488 |
| 1428803_at |                                                                     | 1428803_at   | -1.21 | 0.0259 | 3489 |
| Acly       | ATP citrate lyase                                                   | 1451666_at   | 1.21  | 0.0351 | 3490 |
| Tor1b      | torsin family 1, member B                                           | 1417819_at   | -1.21 | 0.0089 | 3491 |
| Theg       | testicular haploid expressed gene                                   | 1425244_a_at | 1.21  | 0.0051 | 3492 |
| Agt        | angiotensinogen (serpin peptidase inhibitor, clade A, member 8)     | 1423396_at   | 1.21  | 0.0418 | 3493 |
| Ythdf3     | YTH domain family 3                                                 | 1445235_at   | 1.21  | 0.0341 | 3494 |
| Mm.445147  |                                                                     | 1445342_at   | 1.21  | 0.0236 | 3495 |
| Nfatc2     | nuclear factor of activated T-cells, cytoplasmic, calcineurin-depen | 1440426_at   | 1.21  | 0.0270 | 3496 |
| Hdac9      | histone deacetylase 9                                               | 1434572_at   | -1.21 | 0.0372 | 3497 |
| Shisa2     | shisa homolog 2 ( <i>Xenopus laevis</i> )                           | 1423851_a_at | -1.21 | 0.0420 | 3498 |
| Cab39      | calcium binding protein 39                                          | 1418432_at   | 1.21  | 0.0419 | 3499 |
| Gpx1       | glutathione peroxidase 1                                            | 1460671_at   | 1.21  | 0.0092 | 3500 |
| Egln3      | EGL nine homolog 3 ( <i>C. elegans</i> )                            | 1425918_at   | -1.21 | 0.0279 | 3501 |
| Eif4a1     | eukaryotic translation initiation factor 4A1                        | 1430980_a_at | 1.21  | 0.0175 | 3502 |
| Lrrc48     | leucine rich repeat containing 48                                   | 1424340_at   | 1.21  | 0.0304 | 3503 |
| Cldn12     | claudin 12                                                          | 1433781_a_at | 1.21  | 0.0151 | 3504 |
| Tnfrsf21   | tumor necrosis factor receptor superfamily, member 21               | 1450731_s_at | -1.21 | 0.0226 | 3505 |
| Cep152     | centrosomal protein 152                                             | 1427496_at   | -1.21 | 0.0198 | 3506 |
| Car7       | carbonic anhydrase 7                                                | 1443824_s_at | -1.21 | 0.0107 | 3507 |
| Fkbp11     | FK506 binding protein 11                                            | 1417267_s_at | 1.21  | 0.0241 | 3508 |

|               |                                                                    |              |       |        |      |
|---------------|--------------------------------------------------------------------|--------------|-------|--------|------|
| Ccnh          | cyclin H                                                           | 1418585_at   | -1.21 | 0.0033 | 3509 |
| Cyb5r3        | cytochrome b5 reductase 3                                          | 1425329_a_at | 1.21  | 0.0104 | 3510 |
| Gcnt2         | glucosaminyl (N-acetyl) transferase 2, I-branching enzyme          | 1451733_at   | -1.21 | 0.0057 | 3511 |
| Mm.381770     |                                                                    | 1430630_at   | 1.21  | 0.0252 | 3512 |
| Ear3          | eosinophil-associated, ribonuclease A family, member 3             | 1422411_s_at | 1.21  | 0.0084 | 3513 |
| Tstd1         | thiosulfate sulfurtransferase (rhodanese)-like domain containing 1 | 1456169_at   | -1.21 | 0.0119 | 3514 |
| E030031F02Rik | RIKEN cDNA E030031F02 gene                                         | 1444673_at   | -1.21 | 0.0147 | 3515 |
| Reep3         | receptor accessory protein 3                                       | 1424778_at   | 1.21  | 0.0279 | 3516 |
| 1431340_a_at  |                                                                    | 1431340_a_at | 1.21  | 0.0297 | 3517 |
| BG069024      |                                                                    | 1446801_at   | 1.21  | 0.0339 | 3518 |
| Cd180         | CD180 antigen                                                      | 1446259_at   | -1.21 | 0.0164 | 3519 |
| Arih1         | ariadne ubiquitin-conjugating enzyme E2 binding protein homolog 1  | 1439165_at   | 1.21  | 0.0495 | 3520 |
| Sec1          | secretory blood group 1                                            | 1423009_at   | -1.21 | 0.0107 | 3521 |
| 4930452B06Rik | RIKEN cDNA 4930452B06 gene                                         | 1438228_at   | -1.21 | 0.0218 | 3522 |
| 1700037H04Rik | RIKEN cDNA 1700037H04 gene                                         | 1460262_a_at | 1.21  | 0.0013 | 3523 |
| Ppfbp1        | PTPRF interacting protein, binding protein 1 (liprin beta 1)       | 1452759_s_at | -1.21 | 0.0096 | 3524 |
| D630004N19Rik | RIKEN cDNA D630004N19 gene                                         | 1442016_at   | -1.21 | 0.0156 | 3525 |
| 1424390_at    |                                                                    | 1424390_at   | 1.21  | 0.0246 | 3526 |
| Htt           | huntingtin                                                         | 1425969_a_at | 1.21  | 0.0202 | 3527 |
| Yif1b         | Yip1 interacting factor homolog B (S. cerevisiae)                  | 1428445_at   | 1.21  | 0.0023 | 3528 |
| Rnf157        | ring finger protein 157                                            | 1454953_at   | 1.21  | 0.0067 | 3529 |
| Snopc2        | small nuclear RNA activating complex, polypeptide 2                | 1436703_x_at | 1.21  | 0.0011 | 3530 |
| Kifc2         | kinesin family member C2                                           | 1426493_a_at | -1.21 | 0.0131 | 3531 |
| Dab2ip        | disabled homolog 2 (Drosophila) interacting protein                | 1433558_at   | 1.21  | 0.0407 | 3532 |
| Esco1         | establishment of cohesion 1 homolog 1 (S. cerevisiae)              | 1424324_at   | 1.21  | 0.0351 | 3533 |
| Kalrn         | kalirin, RhoGEF kinase                                             | 1457690_at   | -1.21 | 0.0467 | 3534 |
| AI836003      | expressed sequence AI836003                                        | 1435512_at   | 1.21  | 0.0048 | 3535 |

|               |                                                                |              |       |          |      |
|---------------|----------------------------------------------------------------|--------------|-------|----------|------|
| Ttc39b        | tetratricopeptide repeat domain 39B                            | 1452008_at   | 1.21  | 0.0277   | 3536 |
| Dact3         | dapper homolog 3, antagonist of beta-catenin (xenopus)         | 1443805_at   | 1.21  | 0.0461   | 3537 |
| Slco1c1       | solute carrier organic anion transporter family, member 1c1    | 1423343_at   | -1.21 | 0.0023   | 3538 |
| Phlpp1        | PH domain and leucine rich repeat protein phosphatase 1        | 1426994_at   | -1.21 | 6.00E-05 | 3539 |
| Ppa2          | pyrophosphatase (inorganic) 2                                  | 1437573_at   | -1.21 | 0.0150   | 3540 |
| Gria4         | glutamate receptor, ionotropic, AMPA4 (alpha 4)                | 1435722_at   | -1.21 | 0.0013   | 3541 |
| Bcl11b        | B-cell leukemia/lymphoma 11B                                   | 1435227_at   | -1.21 | 0.0063   | 3542 |
| Smg7          | Smg-7 homolog, nonsense mediated mRNA decay factor (C. elegar  | 1455574_at   | 1.21  | 0.0080   | 3543 |
| Fhod3         | formin homology 2 domain containing 3                          | 1435551_at   | 1.21  | 0.0366   | 3544 |
| Brp44         | brain protein 44                                               | 1423833_a_at | -1.21 | 0.0059   | 3545 |
| Zdhhc20       | zinc finger, DHHC domain containing 20                         | 1451437_at   | 1.21  | 0.0091   | 3546 |
| Usp47         | ubiquitin specific peptidase 47                                | 1426976_at   | 1.21  | 0.0064   | 3547 |
| Rbm22         | RNA binding motif protein 22                                   | 1452675_at   | -1.21 | 0.0047   | 3548 |
| Tapbp         | TAP binding protein                                            | 1450378_at   | 1.21  | 0.0102   | 3549 |
| Clip3         | CAP-GLY domain containing linker protein 3                     | 1430543_at   | 1.21  | 0.0008   | 3550 |
| Wdfy2         | WD repeat and FYVE domain containing 2                         | 1434517_at   | 1.21  | 0.0026   | 3551 |
| Dcbld1        | discoidin, CUB and LCCL domain containing 1                    | 1449291_a_at | -1.20 | 0.0329   | 3552 |
| 2010005J08Rik | RIKEN cDNA 2010005J08 gene                                     | 1433499_at   | 1.20  | 0.0381   | 3553 |
| Phf20         | PHD finger protein 20                                          | 1452259_at   | -1.20 | 0.0199   | 3554 |
| Pias2         | protein inhibitor of activated STAT 2                          | 1419454_x_at | 1.20  | 0.0389   | 3555 |
| Lman2l        | lectin, mannose-binding 2-like                                 | 1435475_at   | 1.20  | 0.0495   | 3556 |
| Col24a1       | collagen, type XXIV, alpha 1                                   | 1447093_at   | -1.20 | 0.0018   | 3557 |
| Nxn           | nucleoredoxin                                                  | 1422466_at   | 1.20  | 0.0019   | 3558 |
| B3galnt1      | UDP-GalNAc:betaGlcNAc beta 1,3-galactosaminyltransferase, poly | 1418736_at   | -1.20 | 0.0078   | 3559 |
| C330007P06Rik | RIKEN cDNA C330007P06 gene                                     | 1429895_at   | 1.20  | 0.0388   | 3560 |
| C230066G23Rik | RIKEN cDNA C230066G23 gene                                     | 1444340_at   | -1.20 | 0.0176   | 3561 |
| Dck           | deoxycytidine kinase                                           | 1449176_a_at | -1.20 | 0.0452   | 3562 |

|               |                                                                   |              |       |        |      |
|---------------|-------------------------------------------------------------------|--------------|-------|--------|------|
| D930009K15Rik | RIKEN cDNA D930009K15 gene                                        | 1435348_at   | -1.20 | 0.0228 | 3563 |
| Elov16        | ELOVL family member 6, elongation of long chain fatty acids (yeas | 1445062_at   | 1.20  | 0.0118 | 3564 |
| Chmp1b        | chromatin modifying protein 1B                                    | 1418816_at   | 1.20  | 0.0067 | 3565 |
| Cpt2          | carnitine palmitoyltransferase 2                                  | 1416772_at   | 1.20  | 0.0249 | 3566 |
| Incenp        | inner centromere protein                                          | 1439436_x_at | 1.20  | 0.0085 | 3567 |
| Cmb1          | carboxymethylenebutenolidase-like (Pseudomonas)                   | 1451322_at   | -1.20 | 0.0109 | 3568 |
| Zbtb17        | zinc finger and BTB domain containing 17                          | 1416224_at   | 1.20  | 0.0003 | 3569 |
| Crispld2      | cysteine-rich secretory protein LCCL domain containing 2          | 1460458_at   | 1.20  | 0.0337 | 3570 |
| Pdgfrl        | platelet-derived growth factor receptor-like                      | 1428896_at   | 1.20  | 0.0411 | 3571 |
| L2hgdh        | L-2-hydroxyglutarate dehydrogenase                                | 1424858_at   | -1.20 | 0.0300 | 3572 |
| C030015D19Rik | RIKEN cDNA C030015D19 gene                                        | 1459290_at   | 1.20  | 0.0284 | 3573 |
| 8030411F24Rik | RIKEN cDNA 8030411F24 gene                                        | 1451712_at   | 1.20  | 0.0473 | 3574 |
| Rit2          | Ras-like without CAAX 2                                           | 1448125_at   | -1.20 | 0.0426 | 3575 |
| Mm.383899     |                                                                   | 1443038_at   | 1.20  | 0.0330 | 3576 |
| 1451723_at    |                                                                   | 1451723_at   | 1.20  | 0.0243 | 3577 |
| Sec14l1       | SEC14-like 1 (S. cerevisiae)                                      | 1453412_a_at | -1.20 | 0.0165 | 3578 |
| Prim2         | DNA primase, p58 subunit                                          | 1418036_at   | 1.20  | 0.0094 | 3579 |
| 1458177_at    |                                                                   | 1458177_at   | -1.20 | 0.0316 | 3580 |
| Rragc         | Ras-related GTP binding C                                         | 1415749_a_at | 1.20  | 0.0060 | 3581 |
| Fem1c         | fem-1 homolog c (C.elegans)                                       | 1438075_at   | 1.20  | 0.0034 | 3582 |
| Fbxo34        | F-box protein 34                                                  | 1431811_a_at | -1.20 | 0.0004 | 3583 |
| Aga           | aspartylglucosaminidase                                           | 1434665_at   | 1.20  | 0.0262 | 3584 |
| 1443117_at    |                                                                   | 1443117_at   | -1.20 | 0.0190 | 3585 |
| Phka2         | phosphorylase kinase alpha 2                                      | 1434518_at   | 1.20  | 0.0312 | 3586 |
| Fbn2          | fibrillin 2                                                       | 1454830_at   | -1.20 | 0.0102 | 3587 |
| Mcf2l         | mcf.2 transforming sequence-like                                  | 1434140_at   | -1.20 | 0.0200 | 3588 |
| C730029A08Rik | RIKEN cDNA C730029A08 gene                                        | 1436168_at   | 1.20  | 0.0013 | 3589 |

|               |                                                                  |              |       |        |      |
|---------------|------------------------------------------------------------------|--------------|-------|--------|------|
| 1445186_at    |                                                                  | 1445186_at   | -1.20 | 0.0030 | 3590 |
| 1421043_s_at  |                                                                  | 1421043_s_at | 1.20  | 0.0229 | 3591 |
| 1433180_at    |                                                                  | 1433180_at   | -1.20 | 0.0105 | 3592 |
| Setd8         | SET domain containing (lysine methyltransferase) 8               | 1426406_at   | 1.20  | 0.0472 | 3593 |
| Itih5         | inter-alpha (globulin) inhibitor H5                              | 1429159_at   | 1.20  | 0.0452 | 3594 |
| Yipf4         | Yip1 domain family, member 4                                     | 1450418_a_at | -1.20 | 0.0219 | 3595 |
| Ccnh          | cyclin H                                                         | 1456293_s_at | -1.20 | 0.0002 | 3596 |
| 1418877_at    |                                                                  | 1418877_at   | 1.20  | 0.0052 | 3597 |
| Sox4          | SRY-box containing gene 4                                        | 1419157_at   | 1.20  | 0.0349 | 3598 |
| Map3k12       | mitogen-activated protein kinase kinase kinase 12                | 1417115_at   | -1.20 | 0.0221 | 3599 |
| Grip1         | glutamate receptor interacting protein 1                         | 1421350_a_at | -1.20 | 0.0287 | 3600 |
| C230085N15Rik | RIKEN cDNA C230085N15 gene                                       | 1438125_at   | -1.20 | 0.0259 | 3601 |
| Lmtk2         | lemur tyrosine kinase 2                                          | 1455018_at   | 1.20  | 0.0014 | 3602 |
| Rangap1       | RAN GTPase activating protein 1                                  | 1451092_a_at | 1.20  | 0.0157 | 3603 |
| Hipk2         | homeodomain interacting protein kinase 2                         | 1424863_a_at | -1.20 | 0.0003 | 3604 |
| Ush2a         | Usher syndrome 2A (autosomal recessive, mild) homolog (human)    | 1445972_at   | 1.20  | 0.0216 | 3605 |
| Rrm2b         | ribonucleotide reductase M2 B (TP53 inducible)                   | 1437476_at   | -1.20 | 0.0422 | 3606 |
| Tm6sf2        | transmembrane 6 superfamily member 2                             | 1425079_at   | 1.20  | 0.0345 | 3607 |
| Mthfd1l       | methylenetetrahydrofolate dehydrogenase (NADP+ dependent) 1-like | 1456653_a_at | -1.20 | 0.0427 | 3608 |
| Cep192        | centrosomal protein 192                                          | 1428727_at   | -1.20 | 0.0286 | 3609 |
| Slc35f5       | solute carrier family 35, member F5                              | 1452059_at   | -1.20 | 0.0061 | 3610 |
| Srgap3        | SLIT-ROBO Rho GTPase activating protein 3                        | 1425741_at   | 1.20  | 0.0398 | 3611 |
| Yes1          | Yamaguchi sarcoma viral (v-yes) oncogene homolog 1               | 1449090_a_at | -1.20 | 0.0053 | 3612 |
| 1459568_at    |                                                                  | 1459568_at   | -1.20 | 0.0254 | 3613 |
| Brcc3         | BRCA1/BRCA2-containing complex, subunit 3                        | 1437553_at   | 1.20  | 0.0039 | 3614 |
| Satb1         | special AT-rich sequence binding protein 1                       | 1416007_at   | -1.20 | 0.0249 | 3615 |
| Ctsd          | cathepsin D                                                      | 1448118_a_at | 1.20  | 0.0317 | 3616 |

|               |                                                             |              |       |        |      |
|---------------|-------------------------------------------------------------|--------------|-------|--------|------|
| AI662168      | expressed sequence AI662168                                 | 1447389_at   | -1.20 | 0.0350 | 3617 |
| Ift80         | intraflagellar transport 80 homolog (Chlamydomonas)         | 1428329_a_at | -1.20 | 0.0096 | 3618 |
| 1446244_at    |                                                             | 1446244_at   | -1.20 | 0.0005 | 3619 |
| Gabpa         | GA repeat binding protein, alpha                            | 1450665_at   | 1.20  | 0.0260 | 3620 |
| Reps2         | RALBP1 associated Eps domain containing protein 2           | 1435389_at   | -1.20 | 0.0017 | 3621 |
| Pygb          | brain glycogen phosphorylase                                | 1445397_at   | -1.20 | 0.0145 | 3622 |
| Aox1          | aldehyde oxidase 1                                          | 1419435_at   | 1.20  | 0.0017 | 3623 |
| Nos3          | nitric oxide synthase 3, endothelial cell                   | 1422622_at   | 1.20  | 0.0229 | 3624 |
| 1435942_at    |                                                             | 1435942_at   | 1.20  | 0.0316 | 3625 |
| Cep68         | centrosomal protein 68                                      | 1456325_at   | -1.20 | 0.0138 | 3626 |
| Rfx3          | regulatory factor X, 3 (influences HLA class II expression) | 1425413_at   | -1.20 | 0.0176 | 3627 |
| Rfc2          | replication factor C (activator 1) 2                        | 1457669_x_at | -1.20 | 0.0114 | 3628 |
| 2310076G13Rik | RIKEN cDNA 2310076G13 gene                                  | 1429505_at   | 1.20  | 0.0219 | 3629 |
| 1437933_at    |                                                             | 1437933_at   | -1.20 | 0.0228 | 3630 |
| 1430034_at    |                                                             | 1430034_at   | 1.20  | 0.0208 | 3631 |
| Gon4l         | gon-4-like (C.elegans)                                      | 1431314_a_at | 1.20  | 0.0107 | 3632 |
| 3222401L13Rik | RIKEN cDNA 3222401L13 gene                                  | 1458446_at   | 1.20  | 0.0312 | 3633 |
| Gjb3          | gap junction protein, beta 3                                | 1416715_at   | -1.20 | 0.0178 | 3634 |
| Dnaja4        | DnaJ (Hsp40) homolog, subfamily A, member 4                 | 1434196_at   | 1.20  | 0.0018 | 3635 |
| AI747699      | expressed sequence AI747699                                 | 1433914_at   | 1.20  | 0.0008 | 3636 |
| Tcf15         | transcription factor 15                                     | 1449592_at   | -1.20 | 0.0148 | 3637 |
| Fam102a       | family with sequence similarity 102, member A               | 1426893_at   | -1.20 | 0.0345 | 3638 |
| Ubap2l        | ubiquitin associated protein 2-like                         | 1454643_at   | 1.20  | 0.0479 | 3639 |
| 1423131_at    |                                                             | 1423131_at   | -1.20 | 0.0136 | 3640 |
| Mapk6         | mitogen-activated protein kinase 6                          | 1419168_at   | 1.20  | 0.0116 | 3641 |
| Pacs2         | phosphofurin acidic cluster sorting protein 2               | 1426963_at   | -1.20 | 0.0008 | 3642 |
| Pgap3         | post-GPI attachment to proteins 3                           | 1440613_at   | 1.20  | 0.0225 | 3643 |

|            |                                                      |            |       |        |      |
|------------|------------------------------------------------------|------------|-------|--------|------|
| Ebag9      | estrogen receptor-binding fragment-associated gene 9 | 1422669_at | -1.20 | 0.0104 | 3644 |
| 1436257_at |                                                      | 1436257_at | 1.20  | 0.0069 | 3645 |

---
