# Supplementary material for: Deficiency of Schnurri-2, an MHC Enhancer Binding Protein, Induces Mild Chronic Inflammation in the Brain and Confers Molecular, Neuronal, and Behavioral Phenotypes Related to Schizophrenia
Source: PubMed Central journal article supplement — Neuropsychopharmacology. 2013 Mar 6;38(8):1409–25. doi: 10.1038/npp.2013.38 (PMC3682135; doi:10.1038/npp.2013.38), 2013-03-06
Supplement: npp201338x5.pdf [file npp201338x5.pdf]

Supplementary Table 5. Proteins differentially expressed in the whole hippocampus or the dentate gyrus of Shn-2 KO mice.

| Symbol   | Description                                                                               | Hippocampus |         | Dentate gyrus |         |
|----------|-------------------------------------------------------------------------------------------|-------------|---------|---------------|---------|
|          |                                                                                           | Fold Change | P value | Fold Change   | P value |
| GFAP     | glial fibrillary acidic protein                                                           | 3.60        | 0.0007  | 2.05          | 0.0007  |
| ATP5K    | ATP synthase e chain, mitochondrial                                                       | -1.66       | 0.0017  | -1.99         | 0.0042  |
| ATP5F1   | ATP synthase, H <sup>+</sup> transporting, mitochondrial F0 complex, subunit b, isoform 1 |             |         | -1.10         | 0.0073  |
| ATP6V1A  | ATPase, H <sup>+</sup> transporting, lysosomal 70kDa, V1 subunit A                        |             |         | 1.46          | 0.0004  |
| ATP6V1B2 | vacuolar H <sup>+</sup> ATPase B2 isoform 2                                               |             |         | 1.42          | 0.0014  |
| UB       | 1d8 ubiquitin mutant                                                                      | -1.60       | 0.0054  |               |         |
| UBB      | ubiquitin B                                                                               | -1.60       | 0.0054  |               |         |
| CALB2    | calbindin 2                                                                               |             |         | 1.45          | 0.0010  |
| HPCA     | hippocalcin                                                                               |             |         | 1.44          | 0.0190  |
| INPP1    | inositol polyphosphate-1-phosphatase                                                      | 1.43        | 0.0480  | -1.25         | 0.0450  |
| EG628438 | CPN10-like protein                                                                        | -1.42       | 0.0120  |               |         |
| HSPE1    | heat shock protein 1 (chaperonin 10)                                                      | -1.42       | 0.0120  | -1.99         | 0.0042  |
| UQCRFS1  | ubiquinol-cytochrome C reductase, Rieskeiron-sulfer polypeptide 1                         | -1.41       | 0.0180  | -1.12         | 0.0200  |
| ARPC5    | actin related protein 2/3 complex, subunit 5                                              |             |         | -1.41         | 0.0006  |
| GPD1     | glycerol-3-phosphate dehydrogenase 1                                                      |             |         | 1.40          | 0.0057  |
| COX5B    | cytochrome C oxidase, subunit V6                                                          |             |         | 1.40          | 0.0004  |
| CKMT1    | Creatin kinase, mitochondrial 1                                                           | -1.37       | 0.0170  | -1.26         | 0.0013  |
| PPP3CA   | calcineurin A alpha                                                                       | 1.37        | 0.0230  | 1.27          | 0.0031  |
| STMN1    | stathmin 1                                                                                | -1.35       | 0.0310  | -1.23         | 0.0270  |
| ADAM5    | a disintegrin and metallopeptidase domain 5                                               | -1.33       | 0.0082  |               |         |
| KLHL10   | kelch-like 10                                                                             | -1.33       | 0.0490  |               |         |
| VDAC2    | voltage-dependent anion chanel 2                                                          | -1.32       | 0.0300  |               |         |
| ATP5D    | ATP-synthase, H <sup>+</sup> transporting mitcondrial F1 complex, delta subunit precursor | -1.31       | 0.0200  | -1.15         | 0.0320  |
| MYL6     | myosin, light chain 6, allcali, smooth muscle and non-muscle isoform 1                    | -1.31       | 0.0200  |               |         |
| SNCB     | synuclein, beta                                                                           | -1.31       | 0.0200  | -1.15         | 0.0320  |
| SEPT2    | septin 2                                                                                  | -1.29       | 0.0015  |               |         |
| NAPB     | N-ethylmaleimide sensitive fusion protein attachment protein beta                         |             |         | 1.29          | 0.0002  |
| FIS1     | fission 1 (mitochondrial outer membrane) homolog                                          |             |         | -1.28         | 0.0150  |

|           |                                                                                           |       |        |       |        |
|-----------|-------------------------------------------------------------------------------------------|-------|--------|-------|--------|
| PHGDH     | D-3-phosphoglycerate dehydrogenase                                                        | 1.27  | 0.0320 |       |        |
| SEPT5     | septin 5                                                                                  | -1.27 | 0.0003 | -1.08 | 0.0480 |
| DBF4      | activator of S phase kinase                                                               | -1.26 | 0.0270 |       |        |
| GSTM5     | glutathione S-transferase, mu5                                                            | -1.25 | 0.0120 | -1.21 | 0.0002 |
| HPRT1     | hypoxanthine phosphoribosyl transferase 1                                                 | -1.25 | 0.0120 | -1.21 | 0.0002 |
| MED6      | Mediator of RNA polymerase II transcription, subunit 6 homolog                            | -1.25 | 0.0150 |       |        |
| UCHL3     | ubiquitin carboxyl-terminal hydrolase isozyme L3                                          | -1.25 | 0.0120 |       |        |
| YWHAH     | tyrosine 3-monooxygenase/ tryptophan 5-monooxygenase activation protein                   | -1.25 | 0.0120 | 1.26  | 0.0006 |
| ACTR3     | ARP3 actin-related protein 3 homolog                                                      |       |        | -1.25 | 0.0033 |
| BDNF      | brain-derived neurotrophic factor                                                         | -1.24 | 0.0360 |       |        |
| GLOD4     | glyoxalase domain-containing protein 4                                                    | 1.24  | 0.0380 | 1.25  | 0.0012 |
| LOC574157 | similar to sperm surface protein Sp17                                                     | -1.24 | 0.0360 |       |        |
| NAPA      | N-ethylmaleimide sensitive fusion protein attachment protein alpha                        | 1.24  | 0.0380 | 1.25  | 0.0012 |
| SPA17     | sperm surface protein Sp17 (sperm autoantigenic protein 17)                               | -1.24 | 0.0360 |       |        |
| GON4L     | gon-4 like isoform a                                                                      | -1.23 | 0.0240 |       |        |
| STX18     | syntaxin-18                                                                               |       |        | 1.23  | 0.0031 |
| ARBP      | acidic ribosomal phosphoprotein                                                           | -1.22 | 0.0480 |       |        |
| RPLP0     | ribosomal protein P0                                                                      | -1.22 | 0.0480 |       |        |
| PCBP1     | poly (rc) binding protein 1                                                               |       |        | 1.22  | 0.0063 |
| AKR1      | aldose reductase (aldo-keto reductase family 1)                                           | -1.21 | 0.0370 |       |        |
| AKR1B3    | aldo-keto reductase family 1, member B3 (aldose reductase)                                |       |        | 1.40  | 0.0057 |
| CORO1A    | Coronin-1A                                                                                | -1.21 | 0.0061 | -1.18 | 0.0001 |
| ACO2      | mitochondrial aconitase 2                                                                 |       |        | -1.21 | 0.0002 |
| GRIA2     | glutamate receptor, ionotropic, AMPA2 isoform 3                                           |       |        | -1.21 | 0.0002 |
| YWHAJ     | tyrosine 3-monooxygenase/tryptophan 5-monooxygenase activation protein, gamma polypeptide |       |        | 1.21  | 0.0012 |
| CAPZB     | capping protein (actin filament) muscle Z-like, beta                                      |       |        | -1.20 | 0.0001 |
| DLD       | dihydrolipoamide dehydrogenase                                                            |       |        | -1.19 | 0.0140 |
| MAPK1     | mitogen activated protein kinase 1                                                        |       |        | 1.19  | 0.0180 |
| GBAS      | protein NipSnap homolog 2 (Glioblastoma-amplified sequence)                               |       |        | -1.19 | 0.0057 |
| GSTM1     | glutathione S-transferase, mu1                                                            |       |        | -1.19 | 0.0110 |
| UQCRC1    | ubiquinol-cytochrome C reductase core protein 1                                           | -1.18 | 0.0200 |       |        |

|          |                                                                                       |       |        |       |        |
|----------|---------------------------------------------------------------------------------------|-------|--------|-------|--------|
| DLAT     | dihydrolipoamide S-acetyltransferase (E2 component of pyruvate dehydrogenase complex) |       |        | 1.18  | 0.0044 |
| PRDX1    | peroxiredoxin-1                                                                       |       |        | 1.18  | 0.0260 |
| ALDOA    | aldolase 1, A isoform                                                                 | 1.17  | 0.0100 | -1.22 | 0.0010 |
| CAR2     | carbonic anhydrase 2                                                                  | -1.17 | 0.0030 |       |        |
| ETFFA    | Electron transfer flavoprotein subunit alpha, mitochondrial precursor                 | -1.17 | 0.0340 | -1.10 | 0.0004 |
| FABP5    | fatty acid-binding protein 5                                                          | -1.17 | 0.0021 |       |        |
| NDUFS1   | NADH dehydrogenase (ubiquinone) Fe-S protein 1                                        | -1.17 | 0.0350 |       |        |
| NDUFA10  | NADH dehydrogenase (ubiquinone) 1, alpha subunit 10                                   |       |        | -1.15 | 0.0003 |
| PGAM1    | phosphoglycerate mutase                                                               | -1.17 | 0.0030 |       |        |
| UBCRC2   | ubiquinol cytochrome c reductase core protein 2                                       |       |        | -1.17 | 0.0080 |
| UQCRB    | ubiquinol-cytochrome C reductase binding protein                                      |       |        | 1.17  | 0.0100 |
| ALDH2    | aldehyde dehydrogenase 2, mitochondrial                                               | -1.16 | 0.0130 |       |        |
| CS       | Citrate synthase                                                                      | -1.16 | 0.0450 | -1.09 | 0.0085 |
| HSP60    | heat shock protein 60                                                                 | 1.16  | 0.0280 |       |        |
| HSP90AB1 | heat shock 90kDa protein 1 beta                                                       |       |        | 1.19  | 0.0190 |
| HSPA8    | heat shock 70kDa protein 8 isoform 1                                                  |       |        | 1.17  | 0.0220 |
| SNTG2    | syntrophin, gamma 2                                                                   | 1.16  | 0.0280 |       |        |
| VDAC1    | voltage-dependent anion channel 2                                                     | -1.16 | 0.0026 | -1.17 | 0.0006 |
| CFL1     | cofilin-1                                                                             | -1.15 | 0.0380 | -1.11 | 0.0310 |
| DOK7     | downstream of tyrosine kinase 7 (docking protein 7)                                   | -1.15 | 0.0058 | -1.15 | 0.0003 |
| HNRPK    | heterogeneous nuclear ribonucleoprotein K                                             | -1.15 | 0.0480 |       |        |
| HNRNPH1  | heterogeneous nuclear ribonucleoprotein H1                                            |       |        | -1.07 | 0.0480 |
| MDH1     | cytosolic malate dehydrogenase                                                        | 1.15  | 0.0088 |       |        |
| PITPNA   | phosphatidylinositol transfer protein, alpha                                          | 1.15  | 0.0088 |       |        |
| FREQ     | Neuronal calcium sensor 1 (Frequenin homolog)                                         | 1.14  | 0.0280 |       |        |
| GSN      | gelsolin                                                                              | 1.14  | 0.0340 |       |        |
| PLG      | Plasminogen                                                                           | 1.14  | 0.0340 |       |        |
| ATP5A1   | ATP synthase, H <sup>+</sup> -transporting, mitochondrial F1 complex, alpha subunit   | 1.13  | 0.0260 | -1.17 | 0.0026 |
| CD40     | tumor necrosis factor receptor superfamily, member 5 isoform 1 (CD40 antigen)         | -1.13 | 0.0300 | 1.24  | 0.0370 |
| CT75     | cancer/ testis antigen 75                                                             | -1.13 | 0.0026 |       |        |
| DNAH7    | dynein, axonemal, heavy chain 7                                                       | 1.13  | 0.0037 |       |        |

|          |                                                    |       |        |       |        |
|----------|----------------------------------------------------|-------|--------|-------|--------|
| LDHA     | L-lactate dehydrogenase A                          | -1.13 | 0.0120 |       |        |
| UCHL1    | ubiquitin carboxyl-terminal hydrolase isozyme L1   | 1.12  | 0.0480 | 1.40  | 0.0007 |
| AK1      | adenylate kinase 1                                 | -1.11 | 0.0110 |       |        |
| AK3      | adenylate kinase 3                                 |       |        | -1.19 | 0.0057 |
| PVALB    | parvalbumin                                        | -1.11 | 0.0170 |       |        |
| SH3BGRL  | SH3-binding domain glutamic acid-rich protein like | -1.11 | 0.0170 |       |        |
| TXN1     | thioredoxin                                        | -1.11 | 0.0170 |       |        |
| GPI1     | glucose phosphate isomerase 1                      |       |        | -1.10 | 0.0130 |
| CDCREL-1 | CDCrel-1A1                                         | -1.09 | 0.0420 |       |        |
| NDUFS8   | NADH dehydrogenase (ubiquinone) Fe-S protein 8     | -1.09 | 0.0420 |       |        |
| PEBP1    | phosphatidylethanolamine binding protein 1         | -1.09 | 0.0420 |       |        |
| PGK1     | phosphoglycerate kinase 1                          | -1.06 | 0.0330 |       |        |
| PSMA6    | proteasome subunit, alpha type 6                   |       |        | -1.05 | 0.0400 |
| PSMB5    | proteasome subunit, beta type 5                    |       |        | -1.16 | 0.0000 |
| PSMB1    | proteasome subunit, beta type 1                    |       |        | -1.10 | 0.0073 |

---
