# Supplementary material for: Deficiency of Schnurri-2, an MHC Enhancer Binding Protein, Induces Mild Chronic Inflammation in the Brain and Confers Molecular, Neuronal, and Behavioral Phenotypes Related to Schizophrenia
Source: PubMed Central journal article supplement — Neuropsychopharmacology. 2013 Mar 6;38(8):1409–25. doi: 10.1038/npp.2013.38 (PMC3682135; doi:10.1038/npp.2013.38), 2013-03-06
Supplement: npp201338x6.pdf [file npp201338x6.pdf]

Supplementary Table 6. Groups of molecules and genes altered in both postmortem brains and the dentate gyrus (DG) and hippocampus (HC) of Shn-2 KO mice.

|                     | DG Microarray<br>(schizophrenia) |              | DG Genechip |             | DG Proteome |             | HC Genechip |             | HC Proteome |             |
|---------------------|----------------------------------|--------------|-------------|-------------|-------------|-------------|-------------|-------------|-------------|-------------|
|                     | Altar et al.                     | Shn2 KO mice | P value     | Fold Change |
| Aldo-Keto Reductase | AKR1A1                           | Akr1b3       |             |             | 0.0057      | 1.4         | 0.0276      | -1.05       |             |             |
|                     | AKR1B1                           | Akr1a4       |             |             |             |             | 0.0254      | -1.05       |             |             |
|                     |                                  | Akr1c18      | 0.0038      | 1.27        |             |             | 0.0216      | 1.36        |             |             |
|                     |                                  | Akr1         |             |             |             |             |             |             | 0.0370      | -1.21       |
|                     |                                  | Aldoa        |             |             |             |             |             |             | 0.0100      | 1.17        |
| ATP related         | ATP6V1E1                         | Atp6v1a      |             |             | 3.60E-04    | 1.46        |             |             |             |             |
|                     | ATP5A1                           | Atp5a1       |             |             | 0.0026      | -1.17       |             |             | 0.0260      | 1.13        |
|                     | ATP1B1                           | Atp6v1b2     |             |             | 0.0014      | 1.42        |             |             |             |             |
|                     |                                  | Atp2b2       | 0.0014      | 1.36        |             |             |             |             |             |             |
|                     |                                  | Atp5k        |             |             | 0.0042      | -1.99       |             |             | 1.70E-03    | -1.66       |
|                     |                                  | Atp5f1/Psmb1 |             |             | 0.0073      | -1.10       |             |             |             |             |
|                     |                                  | Atp5d        |             |             | 0.032       | -1.15       |             |             | 0.0200      | -1.31       |
|                     |                                  | Atp6v1g2     |             |             |             |             | 0.0118      | 1.06        |             |             |
|                     |                                  | Atp6v0e2     |             |             |             |             | 0.0120      | 1.06        |             |             |
|                     |                                  | Atp6v1e1     |             |             |             |             | 0.0242      | 1.05        |             |             |
|                     |                                  | Atp6v0d2     |             |             |             |             | 0.0483      | -1.21       |             |             |
|                     |                                  | Atp5g3       |             |             |             |             | 0.0123      | -1.06       |             |             |
|                     |                                  | Atp5h        |             |             |             |             | 0.0350      | -1.07       |             |             |
|                     |                                  | Atp11c       |             | 4.00E-04    | 1.33        |             |             |             |             |             |
|                     |                                  | Atp2b3       |             | 0.0016      | 1.30        |             |             |             |             |             |
|                     | Atp2c1                           |              | 5.30E-06    | -1.25       |             |             |             |             |             |             |
|                     | Atp2a3                           |              | 4.00E-04    | 1.22        |             |             |             |             |             |             |
|                     | Atp6v1g1                         |              | 4.50E-07    | 1.21        |             |             |             |             |             |             |
| Cytochrome related  | UQCRFS1                          | Uqcrfs1      |             |             | 0.02        | -1.12       |             |             | 0.0180      | -1.41       |
|                     |                                  | Ubcrc2       |             |             | 0.008       | -1.17       |             |             |             |             |
|                     | CYC1                             | Cyc1         |             |             |             |             | 0.0325      | -1.08       |             |             |
|                     | SCO1                             | Cox5b        |             |             | 4.20E-04    | 1.40        |             |             |             |             |
|                     | COX7A2                           | Uqcrb        |             |             | 0.01        | 1.17        |             |             |             |             |
|                     | CYB5R3                           | Uchl1        |             |             | 0.00073     | 1.4         |             |             | 0.0480      | 1.12        |
|                     |                                  | Cyp3a13      |             |             |             |             | 0.0025      | 1.11        |             |             |
|                     |                                  | Cybrd1       |             |             |             |             | 0.0030      | 1.65        |             |             |

|                             |        |                |          |       |          |        |        |        |        |
|-----------------------------|--------|----------------|----------|-------|----------|--------|--------|--------|--------|
|                             |        | Cyba           |          |       |          | 0.0195 | 1.31   |        |        |
|                             |        | Cyb561         | 0.0049   | -1.28 |          |        |        |        |        |
|                             |        | Uqcrh          |          |       |          | 0.0470 | -1.08  |        |        |
| Glucose phosphate isomerase | GPI    | Gpi1           |          |       | 0.013    | -1.10  | 0.0491 | -1.03  |        |
| NADH dehydrogenase          | NDUFB2 | Ndufa10        |          |       | 2.60E-04 | -1.15  | 0.0417 | 1.12   |        |
|                             | NDUFB5 |                |          |       |          |        |        |        |        |
|                             | NDUFS4 |                |          |       |          |        |        |        |        |
|                             |        | Ndufs1         |          |       |          |        |        | 0.0350 | -1.17  |
|                             |        | Ndufs8         |          |       |          |        |        | 0.0420 | -1.09  |
| Phosphoglycerate related    | PGAM1  |                |          |       |          |        |        | 0.0030 | -1.17  |
|                             |        | Pgk1           |          |       | 0.033    | -1.06  |        |        |        |
|                             |        | Phgdh          | 0.0022   | -1.44 |          |        | 0.0393 | -1.10  | 0.0320 |
| Proteasome                  | PSMC6  | PsmA6          |          |       | 0.04     | -1.05  |        |        |        |
|                             | PSMD8  | PsmB5          |          |       | 2.90E-05 | -1.16  |        |        |        |
|                             | PSMD9  | PsmB1 / Atp5f1 |          |       | 0.0073   | -1.10  |        |        |        |
|                             | PSME1  | PsmB8          |          |       |          |        | 0.0386 | 1.23   |        |
|                             | PSMA1  | PsmG2          | 2.30E-04 | -1.27 |          |        |        |        |        |
|                             | PSMB6  |                |          |       |          |        |        |        |        |
| Ubiquitin related           | UCHL1  | Uchl1          |          |       | 7.30E-04 | 1.40   |        | 0.0480 | 1.12   |
|                             | UBB    | Ubb            |          |       |          |        |        | 0.0054 | -1.60  |
|                             | UBE2D1 | Uchl3          |          |       |          |        | 0.0120 | -1.25  |        |
|                             | UBL4A  | Usp22          |          |       |          |        | 0.0017 | 1.15   |        |
|                             |        | Usp29          | 6.60E-06 | 1.90  |          |        | 0.0034 | 1.18   |        |
|                             |        | Ubl5           |          |       |          |        | 0.0042 | 1.38   |        |
|                             |        | Ube2I3         |          |       |          |        | 0.0105 | 1.10   |        |
|                             |        | Ube2b          |          |       |          |        | 0.0116 | -1.06  |        |
|                             |        | Usp22          |          |       |          |        | 0.0130 | 1.14   |        |
|                             |        | Ube2d2         |          |       |          |        | 0.0140 | 1.09   |        |
|                             |        | Ube2e2         |          |       |          |        | 0.0168 | 1.17   |        |
|                             |        | Usp38          |          |       |          |        | 0.0192 | 1.15   |        |
|                             |        | Usp16          |          |       |          |        | 0.0220 | 1.14   |        |
|                             |        | Usp40          |          |       |          |        | 0.0391 | -1.24  |        |
|                             |        | Wwp2           |          |       |          |        | 0.0444 | -1.18  |        |
|                             |        | Usp39          |          |       |          |        | 0.0476 | 1.05   |        |
|                             |        | Usp25          |          |       |          |        | 0.0487 | 1.17   |        |
|                             |        | Ups48          | 0.0035   | 1.21  |          |        |        |        |        |

|                  |       |         |        |       |        |                |
|------------------|-------|---------|--------|-------|--------|----------------|
|                  |       | Usp27x  | 0.0049 | 1.27  |        |                |
|                  |       | Ube2v2  | 0.0006 | 1.24  |        |                |
|                  |       | Uhrf2   | 0.0020 | -1.27 |        |                |
|                  |       | Hace1   | 0.0013 | -1.43 |        |                |
|                  |       | Nub1    | 0.0050 | 1.22  |        |                |
| Calbindin        | CALB1 | Calb1   | 0.0010 | -5.36 |        | 1.42E-05 -2.02 |
| Syntaxin related | STX8  | Stx18   |        |       | 0.0031 | 1.23           |
|                  |       | Stxbp6  |        |       |        | 0.0123 1.32    |
|                  |       | Stx6    | 0.0029 | 1.28  |        | 0.0337 1.13    |
|                  |       | Stx4a   |        |       |        | 0.0342 -1.19   |
|                  |       | Stx2    | 0.0029 | -1.45 |        |                |
|                  |       | Stxbp3a | 0.0010 | 1.42  |        |                |
|                  |       | Stxbp1  | 0.0002 | 1.24  |        |                |

Downregulated genes or proteins

Upregulated genes or proteins

Genes or proteins whose direction of the regulation is not consistent in Shn-2 KO mice
