# Supplementary material for: Deficiency of Schnurri-2, an MHC Enhancer Binding Protein, Induces Mild Chronic Inflammation in the Brain and Confers Molecular, Neuronal, and Behavioral Phenotypes Related to Schizophrenia
Source: PubMed Central journal article supplement — Neuropsychopharmacology. 2013 Mar 6;38(8):1409–25. doi: 10.1038/npp.2013.38 (PMC3682135; doi:10.1038/npp.2013.38), 2013-03-06
Supplement: npp201338x7.pdf [file npp201338x7.pdf]

Supplementary Table 7. Biosets highly correlated with the hippocampal transcriptome of Shn-2 KO mice.

| Rank in p-value | Group                    | Public id  | Bioset Name                                                                                                                       | Correlation | Common Genes | P value  |
|-----------------|--------------------------|------------|-----------------------------------------------------------------------------------------------------------------------------------|-------------|--------------|----------|
| 1               | Tumor                    | GSE21687   | Ependymona cell lines _vs_ primary tumors                                                                                         | -           | 993          | 1.10E-48 |
| 2               | Aging                    | GSE11528   | Whole brain from Mus musculus - P56 young adult mice _vs_ P0 newborn mice                                                         | +           | 756          | 1.00E-44 |
| 3               | Relative gene expression | GSE4734    | C57BL_6J hippocampus - relative gene expression compared to the median of its expression across 5 brain regions in 6 strains      | +           | 1411         | 1.40E-42 |
| 4               | Aging                    | GSE11528   | Whole brain from Mus musculus - P14 mice pups _vs_ P0 newborn mice                                                                | +           | 682          | 3.40E-41 |
| 5               | Aging                    | GSE8150    | Neocortex from aged mice treated with alpha- and gamma-tocopherol _vs_ young untreated mice                                       | +           | 447          | 1.90E-40 |
| 6               | Aging                    | GSE8150    | Neocortex from aged mice treated with alpha-tocopherol _vs_ young untreated mice                                                  | +           | 448          | 2.90E-40 |
| 7               | Relative gene expression | GSE4734    | C3H_HeJ hippocampus - relative gene expression compared to the median of its expression across 5 brain regions in 6 strains       | +           | 1411         | 6.60E-40 |
| 8               | Aging                    | GSE11528   | Whole brain from Mus spretus - P14 mice pups _vs_ P0 newborn mice                                                                 | +           | 652          | 1.10E-38 |
| 9               | Aging                    | GSE11528   | Whole brain from Mus spretus - P56 young adult mice _vs_ P0 newborn mice                                                          | +           | 716          | 2.80E-38 |
| 10              | Genetic modification     | E-MEXP-962 | Alpha-CaMKII HKO mice _vs_ wild type                                                                                              | +           | 211          | 1.40E-37 |
| 11              | Aging                    | GSE8150    | Neocortex from aged mice _vs_ young untreated mice                                                                                | +           | 405          | 3.10E-36 |
| 12              | Tumor                    | GSE6463    | Granule neuron precursors from Ink4c-p53- mice overexpressing Cyclin D1 _vs_ not overexpressing                                   | +           | 349          | 4.70E-36 |
| 13              | Aging                    | GSE13120   | Mouse neocortex 30mo _vs_ 5mo                                                                                                     | +           | 396          | 2.20E-35 |
| 14              | Aging                    | GSE12454   | Forebrain from wildtype C57BLx129 mice - P0.5 _vs_ E13.5                                                                          | +           | 689          | 1.20E-34 |
| 15              | Comparison of tissues    | GSE8044    | Mus musculus brown adipose tissue _vs_ white adipose tissue                                                                       | -           | 681          | 1.20E-33 |
| 16              | Aging                    | GSE20547   | Cerebellum of wildtype female mice 20-22 mo _vs_ 6 mo old                                                                         | +           | 464          | 6.90E-33 |
| 17              | TRAP                     | GSE13379   | TRAP astrocyte RNA from mouse cortex _vs_ unbound RNA                                                                             | -           | 836          | 6.90E-33 |
| 18              | Aging                    | GSE19677   | Whole striatum of YAC128 transgenic Huntingtin's model mice - 24mo old _vs_ 12mo old_GPL1261                                      | +           | 777          | 1.50E-32 |
| 19              | Relative gene expression | GSE4734    | FVB_NJ hippocampus - relative gene expression compared to the median of its expression across 5 brain regions in 6 strains        | +           | 1411         | 2.20E-32 |
| 20              | Relative gene expression | GSE4734    | DBA_2J hippocampus - relative gene expression compared to the median of its expression across 5 brain regions in 6 strains        | +           | 1411         | 2.50E-32 |
| 21              | Aging                    | GSE12454   | Forebrain from Atrx-null C57BLx129 mice - P0.5 _vs_ E13.5                                                                         | +           | 864          | 1.10E-31 |
| 22              | TRAP                     | GSE13379   | TRAP cholinergic neuronal RNA from mouse corpus striatum _vs_ unbound RNA                                                         | -           | 707          | 3.70E-31 |
| 23              | Comparison of tissues    | GSE13394   | Drd1a subclass of medium spiny neurons from mouse striatum _vs_ Purkinje neurons from cerebellum                                  | +           | 818          | 6.40E-31 |
| 24              | Comparison of tissues    | GSE13394   | Drd2 subclass of medium spiny neurons from mouse striatum _vs_ Purkinje neurons from cerebellum                                   | +           | 829          | 9.20E-31 |
| 25              | Comparison of tissues    | GSE19534   | Neural tissues from wildtype 21mo post-natal mice - striata _vs_ cerebella                                                        | +           | 890          | 2.00E-30 |
| 26              | Relative gene expression | GSE4734    | A_J hippocampus - relative gene expression compared to the median of its expression across 5 brain regions in 6 strains           | +           | 1411         | 6.80E-30 |
| 27              | Neurodegeneration        | GSE10263   | Striatum from R6-2 transgenic mice _vs_ WT_GPL1261                                                                                | -           | 411          | 6.90E-30 |
| 28              | Relative gene expression | GSE4734    | 129S6_SvEvTac hippocampus - relative gene expression compared to the median of its expression across 5 brain regions in 6 strains | +           | 1411         | 1.80E-29 |
| 29              | Comparison of tissues    | GSE19534   | Neural tissues from wildtype 6mo post-natal mice - striata _vs_ cerebella                                                         | +           | 778          | 4.80E-29 |
| 30              | Aging                    | GSE20954   | Lung of ICR strain postnatal day 2 _vs_ embryonic day 12                                                                          | +           | 646          | 1.70E-28 |
| 31              | Drug treatment           | GSE22307   | Colon tissue from mice treated with 3 percent dextran sodium sulfate (DSS) for 4d _vs_ untreated                                  | +           | 483          | 2.30E-28 |

|    |                          |          |                                                                                                                                       |   |      |          |
|----|--------------------------|----------|---------------------------------------------------------------------------------------------------------------------------------------|---|------|----------|
| 32 | Comparison of tissues    | GSE19534 | Neural tissues from SNCA KO 6mo post-natal mice – striata _vs_ cerebella                                                              | + | 789  | 3.40E-28 |
| 33 | Aging                    | GSE20954 | Lung of ICR strain postnatal day 10 _vs_ embryonic day 12                                                                             | + | 563  | 9.10E-28 |
| 34 | TRAP                     | GSE13379 | TRAP cholinergic neuronal RNA from mouse basal forebrain _vs_ unbound RNA                                                             | - | 758  | 1.10E-27 |
| 35 | Comparison of tissues    | GSE18281 | Peri-medullary thymic cortex microdissected from C57BL6 mice _vs_ whole thymic medulla                                                | - | 917  | 1.40E-27 |
| 36 | Relative gene expression | GSE1479  | E14.5 atrial chamber of heart – relative gene expression compared to the median of its expression across 5 brain regions in 6 strains | + | 1411 | 1.50E-27 |
| 37 | Aging                    | GSE20547 | Cerebellum of SNCA-A53T-overexpressing female mice (TgB) 20-22 mo _vs_ 6 mo old                                                       | + | 419  | 2.00E-27 |
| 38 | Comparison of tissues    | GSE19534 | Neural tissues from SNCA KO 21mo post-natal mice – striata _vs_ cerebella                                                             | + | 909  | 2.10E-27 |
| 39 | TRAP                     | GSE13379 | TRAP Pnoc+ neuronal RNA from mouse cerebellum _vs_ unbound RNA                                                                        | - | 438  | 3.00E-27 |
| 40 | Genetic modification     | GSE19402 | Hippocampus of Camk2a-Cre driven G9a KO mice _vs_ GLP KO mice                                                                         | + | 555  | 4.00E-27 |
| 41 | TRAP                     | GSE13379 | TRAP mixed oligodendroglia RNA from mouse cortex _vs_ unbound RNA                                                                     | - | 562  | 6.80E-27 |
| 42 | Comparison of tissues    | GSE7897  | Tissue from mice younger than 76d- Lymphomas of Eu-Myc mice _vs_ wild type lymph node                                                 | - | 793  | 9.10E-27 |
| 43 | TRAP                     | GSE13379 | TRAP Purkinje neuronal RNA from mouse cerebellum _vs_ unbound RNA                                                                     | - | 947  | 1.00E-26 |
| 44 | Aging                    | GSE13799 | Hippocampus from spatial memory unimpaired aged animals _vs_ young                                                                    | + | 149  | 1.40E-26 |
| 45 | TRAP                     | GSE13379 | TRAP Bergmann glia RNA from mouse cerebellum _vs_ unbound RNA                                                                         | - | 846  | 2.50E-26 |
| 46 | Neurodegeneration        | GSE3621  | Brain from 18wk old mice – R6/1 Huntington's model _vs_ wildtype                                                                      | - | 178  | 3.90E-26 |
| 47 | Neurodegeneration        | GSE3621  | Brain from 22wk old mice – R6/1 Huntington's model _vs_ wildtype                                                                      | - | 204  | 2.50E-25 |
| 48 | Drug treatment           | GSE22307 | Colon tissue from mice treated with 3 percent dextran sodium sulfate (DSS) for 6d _vs_ untreated                                      | + | 559  | 2.80E-25 |
| 49 | Aging                    | GSE8091  | Heads from embryonic mice- E13.5 _vs_ E9.5                                                                                            | + | 986  | 3.90E-25 |
| 50 | Aging                    | GSE20547 | Cerebellum of SNCA-A53T-overexpressing female mice (TgA) 20-22 mo _vs_ 6 mo old                                                       | + | 427  | 4.20E-25 |
| 51 | Neurodegeneration        | GSE23182 | Hippocampal tissue of mice treated with 500ug/kg LPS 18wk after ME7 infection _vs_ uninfected                                         | + | 335  | 5.40E-25 |
| 52 | Relative gene expression | GSE1479  | E12.5 heart ventricles – relative gene expression compared to the median of its expression across 5 brain regions in 6 strains        | - | 1411 | 6.60E-25 |
| 53 | Comparison of tissues    | GSE13563 | Protective calvarial bone of skull _vs_ weight bearing mandibular bone                                                                | + | 358  | 8.20E-25 |
| 54 | Genetic modification     | GSE10263 | Striatum from CHL2 knock-in mice _vs_ WT_GPL1261                                                                                      | - | 415  | 1.20E-24 |
| 55 | Aging                    | GSE18597 | Spinal cord SOD1 G93A mutant – 98 day old _vs_ 28 day old                                                                             | + | 445  | 1.60E-24 |
| 56 | Aging                    | GSE10000 | Aorta of ApoE null mice – 78wk old _vs_ 6wk old_GPL1261                                                                               | + | 556  | 5.30E-24 |
| 57 | Genetic modification     | GSE7897  | Early onset Lymphoma from E $\mu$ -Myc transgenic mice _vs_ normal wild type lymph node                                               | - | 770  | 5.70E-24 |
| 58 | Injury                   | GSE5296  | Spinal cord below impact site 72h after injury _vs_ naive                                                                             | + | 349  | 5.70E-24 |
| 59 | Aging                    | GSE19677 | Whole striatum of wildtype mice – 24mo old _vs_ 12mo old_GPL1261                                                                      | + | 681  | 7.30E-24 |
| 60 | Relative gene expression | GSE1479  | E16.5 atrial chamber of heart – relative gene expression compared to the median of its expression across 5 brain regions in 6 strains | + | 1411 | 7.60E-24 |
| 61 | Aging                    | GSE20954 | Lung of ICR strain postnatal day 30 _vs_ embryonic day 12                                                                             | + | 689  | 7.70E-24 |
| 62 | Genetic modification     | GSE8396  | Liver from mice Wy14643 treated 6hr – PPAR $\alpha$ -null _vs_ wildtype                                                               | + | 450  | 1.00E-23 |
| 63 | Comparison of tissues    | GSE7897  | Late onset Lymphoma from Eu-Myc transgenic mice _vs_ normal wild type lymph node                                                      | - | 739  | 1.10E-23 |
| 64 | Treatment                | GSE18341 | Lungs of 16wk adult C57BL6 mice + mechanical ventilation for 2hr _vs_ untreated 2hr                                                   | - | 465  | 1.30E-23 |
| 65 | Genetic modification     | GSE17511 | Skin basal cells from mouse overexpressing tissue-specific IKK- $\beta$ _vs_ wildtype                                                 | + | 307  | 1.60E-23 |
| 66 | Treatment                | GSE13432 | White adipose tissue of mouse housed at 4 degrees 5wk _vs_ room temperature                                                           | - | 473  | 1.90E-23 |
| 67 | Injury                   | GSE5296  | Spinal cord below impact site 28d after injury _vs_ sham-injury                                                                       | + | 154  | 2.00E-23 |

|     |                          |             |                                                                                                                                                      |   |      |          |
|-----|--------------------------|-------------|------------------------------------------------------------------------------------------------------------------------------------------------------|---|------|----------|
| 68  | Relative gene expression | GSE1479     | E18.5 atrial chamber of heart – relative gene expression compared to the median of its expression across 5 brain regions in 6 strains                | + | 1411 | 2.20E-23 |
| 69  | Relative gene expression | GSE2882     | Cingulate cortex_G42_GABA neurons homogenate – relative gene expression compared to the median of its expression across 5 brain regions in 6 strains | + | 929  | 2.40E-23 |
| 70  | Injury                   | GSE5296     | Spinal cord above impact site 72h after injury _vs_ naive                                                                                            | + | 320  | 2.60E-23 |
| 71  | Genetic modification     | GSE18597    | Spinal cord from 112 day old mice – SOD1 G93A mutant _vs_ wildtype                                                                                   | + | 378  | 3.20E-23 |
| 72  | Relative gene expression | GSE4734     | FVB_NJ pituitary gland – relative gene expression compared to the median of its expression across 5 brain regions in 6 strains                       | – | 1411 | 4.00E-23 |
| 73  | Comparison of tissues    | GSE5038     | Wildtype mouse tissue – motor neurons _vs_ total spinal cord                                                                                         | – | 931  | 4.50E-23 |
| 74  | Drug treatment           | GSE6476     | Hippocampus from mice treated 21d with 18mg/kg/d fluoxetine _vs_ untreated                                                                           | + | 95   | 5.50E-23 |
| 75  | Relative gene expression | GSE4734     | C3H_HeJ periaqueductal gray – relative gene expression compared to the median of its expression across 5 brain regions in 6 strains                  | – | 1411 | 5.60E-23 |
| 76  | TRAP                     | GSE13394    | Purkinje neurons from mouse cerebellums – TRAP purified _vs_ unbound RNA                                                                             | – | 850  | 7.40E-23 |
| 77  | Comparison of tissues    | GSE18281    | Medullary thymocytes (CD3hi CD45+) FACs from C57BL6 mice _vs_ whole medulla of thymus                                                                | – | 745  | 9.80E-23 |
| 78  | Genetic modification     | GSE8396     | Liver from mice C22-6 treated 6hr – PPARa-null _vs_ wildtype                                                                                         | + | 316  | 1.80E-22 |
| 79  | Tumor                    | GSE22406    | Mammary tumors of mice expressing inducible c-myc – primary _vs_ recurrent after deinduction                                                         | + | 531  | 2.10E-22 |
| 80  | Aging                    | GSE10000    | Aorta of ApoE null mice – 32wk old _vs_ 6wk old_GPL1261                                                                                              | + | 367  | 2.60E-22 |
| 81  | Treatment                | GSE15155    | Satellite muscle cells from adult mice – cultured 3d activated _vs_ fresh isolated quiescent cells                                                   | – | 753  | 3.20E-22 |
| 82  | Genetic modification     | GSE16585    | Retina of 28d old mice – Nr1 overexpression and Rorb KO _vs_ wildtype                                                                                | + | 631  | 4.40E-22 |
| 83  | Aging                    | GSE13799    | Hippocampus from spatial memory impaired aged animals _vs_ unimpaired young                                                                          | + | 223  | 5.10E-22 |
| 84  | Comparison of tissues    | GSE6383     | E18.5 small intestine– epithelium _vs_ mesenchyme                                                                                                    | – | 797  | 5.30E-22 |
| 85  | Aging                    | GSE4818     | Testes post natal day2 _vs_ day11                                                                                                                    | + | 676  | 6.50E-22 |
| 86  | Drug treatment           | GSE12413    | Heart of C57BL mice treated 14d with 120ug/g/day isoproterenol _vs_ untreated                                                                        | + | 699  | 7.10E-22 |
| 87  | Aging                    | GSE5333     | Epididymus gd18 _vs_ gd12                                                                                                                            | + | 436  | 8.90E-22 |
| 88  | Genetic modification     | GSE18597    | Spinal cord from 98 day old mice – SOD1 G93A mutant _vs_ wildtype                                                                                    | + | 141  | 9.20E-22 |
| 89  | Treatment                | GSE7699     | Liver from mice on ketogenic diet _vs_ chow                                                                                                          | + | 326  | 1.20E-21 |
| 90  | Relative gene expression | GSE4734     | 129S6_SvEvTac periaqueductal gray – relative gene expression compared to the median of its expression across 5 brain regions in 6 strains            | – | 1411 | 1.50E-21 |
| 91  | Comparison of tissues    | GSE18281    | Whole medulla of thymus from C57BI6 mice _vs_ whole thymic cortex                                                                                    | + | 788  | 2.00E-21 |
| 92  | Aging                    | GSE15209    | Neural stem cells derived from the foetal cortex _vs_ normal brain cortex                                                                            | – | 770  | 2.00E-21 |
| 93  | TRAP                     | GSE13394    | Drd1a subclass of medium spiny neurons from mouse striatum – TRAP purified _vs_ unbound RNA                                                          | + | 439  | 2.60E-21 |
| 94  | Aging                    | GSE20954    | Lung of ICR strain embryonic day 18 _vs_ embryonic day 12                                                                                            | + | 569  | 2.70E-21 |
| 95  | Injury                   | GSE5296     | Spinal cord above impact site 24h after injury _vs_ naive                                                                                            | + | 246  | 2.80E-21 |
| 96  | Drug treatment           | GSE13044    | Fetal livers from timed pregnant mice exposed gestation days 1-17 – 10mg/kg/day PFOA _vs_ vehicle                                                    | – | 368  | 3.50E-21 |
| 97  | Comparison of tissues    | GSE6933     | Mouse multipotent adult progenitor cells – clone 3 _vs_ clone 2                                                                                      | + | 742  | 4.20E-21 |
| 98  | Comparison of tissues    | GSE23782    | Skin from 4-OHT treated K14NICDER transgenic mice expressing Notch – epidermis _vs_ whole skin                                                       | – | 587  | 5.00E-21 |
| 99  | Comparison of tissues    | GSE7685     | Mouse tibiae Zone III of growth plate _vs_ Zone I                                                                                                    | + | 606  | 5.70E-21 |
| 100 | Aging                    | E-MEXP-1504 | Liver from wild type mouse aged 130 weeks old _vs_ young 13 weeks old                                                                                | + | 166  | 5.90E-21 |
| 101 | Comparison of tissues    | GSE8024     | Mouse embryonic fibroblasts _vs_ murine neural precursor cells differentiated from ES cells                                                          | + | 675  | 6.70E-21 |
| 102 | Comparison of tissues    | GSE8034     | E14 cortex glial cells– GFAP–GFP High _vs_ low                                                                                                       | – | 405  | 7.90E-21 |

|     |                          |          |                                                                                                                                  |   |      |          |
|-----|--------------------------|----------|----------------------------------------------------------------------------------------------------------------------------------|---|------|----------|
| 103 | Comparison of tissues    | GSE23782 | Skin from 4-OHT treated K14NICDER transgenic mice expressing Notch - epidermis _vs_ dermis                                       | - | 450  | 8.70E-21 |
| 104 | Aging                    | GSE3231  | V6.5 embryonic cells differentiating to embryoid bodies 14d _vs_ 0hr                                                             | + | 515  | 9.30E-21 |
| 105 | Aging                    | GSE10965 | Retinal Pigmental epithelium and Choroid - 4mo old_CHGN vs 26mo old                                                              | - | 400  | 1.10E-20 |
| 106 | Comparison of tissues    | GSE19979 | P7 bladder epithelium from Theiler stage 6 mice - uroplakin positive _vs_ negative                                               | - | 528  | 1.30E-20 |
| 107 | TRAP                     | GSE13379 | TRAP cholinergic neuronal RNA from mouse spinal cord _vs_ unbound RNA                                                            | - | 762  | 1.90E-20 |
| 108 | Treatment                | GSE11679 | CA1 region of hippocampus from postnatally handled mice _vs_ non handled mice                                                    | + | 688  | 2.40E-20 |
| 109 | Drug treatment           | GSE13044 | Fetal livers from timed pregnant mice exposed gestation days 1-17 - 5mg/kg/day PFOA _vs_ vehicle                                 | - | 368  | 2.60E-20 |
| 110 | Genetic modification     | GSE8396  | Liver from mice fenofibrate treated 6hr - PPARa-null _vs_ wildtype                                                               | + | 344  | 2.80E-20 |
| 111 | Relative gene expression | GSE4734  | C57BL_6J pituitary gland - relative gene expression compared to the median of its expression across 5 brain regions in 6 strains | - | 1411 | 3.00E-20 |
| 112 | Treatment                | GSE13071 | Knee joint synovium - collagen induced arthritis moderate inflammation _vs_ healthy control                                      | + | 767  | 3.10E-20 |
| 113 | Genetic modification     | GSE7897  | Tissue from 253-649d old mice - Lymphomas of Eu-Myc mice _vs_ wild type normal lymph node                                        | - | 643  | 3.80E-20 |
| 114 | Comparison of tissues    | GSE6933  | Mouse multipotent adult progenitor cells - clone 3 _vs_ clone 1                                                                  | + | 797  | 4.30E-20 |
| 115 | Aging                    | GSE15452 | Lung of wildtype mice - 28d old _vs_ 1d old                                                                                      | + | 489  | 4.60E-20 |
| 116 | Infection                | GSE8966  | Liver from SCID mice + Arkansas strain E. chaffeensis 15d _vs_ mock infected                                                     | + | 389  | 4.70E-20 |
| 117 | Genetic modification     | GSE7020  | Spleen from Nix KO mice _vs_ WT                                                                                                  | - | 504  | 5.40E-20 |
| 118 | Comparison of tissues    | GSE6933  | Mouse multipotent adult progenitor cells _vs_ marrow stromal cells                                                               | - | 601  | 6.60E-20 |
| 119 | Treatment                | GSE8790  | Lungs of AJ mice + 8d cigarette smoke at 5hr per day _vs_ air                                                                    | + | 635  | 7.50E-20 |
| 120 | Comparison of tissues    | GSE13071 | Knee joint synovium - collagen induced arthritis mild inflammation _vs_ no inflammation                                          | + | 472  | 8.20E-20 |
| 121 | Comparison of tissues    | GSE8024  | Mouse embryonic fibroblasts _vs_ murine embryonic stem cells                                                                     | + | 815  | 1.20E-19 |
| 122 | Infection                | GSE8966  | Liver from SCID mice + Wakulla strain E. chaffeensis 15d _vs_ mock infected                                                      | + | 615  | 1.20E-19 |
| 123 | Comparison of tissues    | GSE13394 | Drd1a subclass of medium spiny neurons from mouse striatum _vs_ motor neurons from brainstem                                     | + | 772  | 1.30E-19 |
| 124 | Genetic modification     | GSE19402 | Hypothalamus of Camk2a-Cre driven G9a KO mice _vs_ GLP KO mice                                                                   | + | 581  | 1.30E-19 |
| 125 | Aging                    | GSE5333  | Epididymus gd16 _vs_ gd12                                                                                                        | + | 424  | 1.50E-19 |
| 126 | Genetic modification     | GSE17478 | Left ventricle of mice exposed to particulate matter - dominant negative CREB _vs_ wildtype                                      | + | 323  | 1.50E-19 |
| 127 | Genetic modification     | GSE15541 | Bone marrow transformed with NUP98-HOXD13 + wildtype MEIS1 overexpression _vs_ control                                           | - | 458  | 1.60E-19 |
| 128 | Relative gene expression | GSE1806  | Diaphragm_8wk - relative gene expression compared to the median of its expression across 5 brain regions in 6 strains            | + | 1411 | 2.00E-19 |
| 129 | Comparison of tissues    | GSE3822  | E11.5 embryonic metanephric mesenchyme _vs_ ureteric bud                                                                         | + | 548  | 2.10E-19 |
| 130 | Comparison of tissues    | GSE13071 | Knee joint synovium - collagen induced arthritis severe inflammation _vs_ no inflammation                                        | + | 693  | 2.20E-19 |
| 131 | Genetic modification     | GSE9355  | Sorted mammary tumor from RAG2 KO mice _vs_ WT hyperplastic mammary cells                                                        | - | 293  | 3.10E-19 |
| 132 | Treatment                | GSE4786  | Cochlea from calorie restricted mice _vs_ middle aged control                                                                    | + | 619  | 3.30E-19 |
| 133 | Aging                    | GSE11186 | Dorsal skin of mouse during second postnatal hair growth cycle - 29d postnatal _vs_ 23d postnatal                                | - | 504  | 3.50E-19 |
| 134 | Genetic modification     | GSE14242 | Long bones from 12d old Hyp mutant mice - Phex mutation _vs_ wildtype                                                            | + | 284  | 3.70E-19 |
| 135 | Injury                   | GSE5296  | Spinal cord below impact site 28d after injury _vs_ naive                                                                        | + | 271  | 4.30E-19 |
| 136 | Comparison of tissues    | GSE13071 | Knee joint synovium - collagen induced arthritis severe inflammation _vs_ healthy control                                        | + | 718  | 4.40E-19 |
| 137 | Comparison of tissues    | GSE9763  | Transformed glial progenitors cells- postnatals _vs_ embryonic progenitors                                                       | + | 875  | 6.40E-19 |
| 138 | Aging                    | GSE8091  | Heads from embryonic mice- E11.5 _vs_ E9.5                                                                                       | + | 893  | 7.30E-19 |
| 139 | Comparison of tissues    | GSE13071 | Knee joint synovium - collagen induced arthritis moderate inflammation _vs_ no inflammation                                      | + | 695  | 7.40E-19 |

|     |                          |             |                                                                                                                                    |   |      |          |
|-----|--------------------------|-------------|------------------------------------------------------------------------------------------------------------------------------------|---|------|----------|
| 140 | Relative gene expression | GSE4734     | 129S6_SvEvTac hypothalamus – relative gene expression compared to the median of its expression across 5 brain regions in 6 strains | – | 1411 | 1.00E–18 |
| 141 | Neurodegeneration        | GSE23182    | Hippocampal tissue of mice treated with 500ug/kg saline 18wk after ME7 infection _vs_ uninfected                                   | + | 427  | 1.00E–18 |
| 142 | Genetic modification     | GSE15541    | Bone marrow transformed with NUP98–HOXD13 + MEIS1–homeodomain deletion overexpression _vs_ control                                 | – | 527  | 1.10E–18 |
| 143 | TRAP                     | GSE13379    | TRAP Drd2+ medium spiny neuronal RNA from mouse striatum _vs_ unbound RNA                                                          | + | 454  | 1.20E–18 |
| 144 | Aging                    | E–MEXP–454  | Genital ridges from Sf1–eGFP transgenic male mice E13.5 _vs_ E10.5                                                                 | + | 468  | 1.20E–18 |
| 145 | Treatment                | GSE23006    | Mucosa of tongue from Balb–c mice – 5d post–wound _vs_ unwounded                                                                   | + | 494  | 1.30E–18 |
| 146 | Aging                    | GSE20547    | Cerebellum of SNCA–A53T–overexpressing female mice 20–22 mo _vs_ 6 mo old                                                          | + | 407  | 1.50E–18 |
| 147 | Injury                   | GSE5296     | Spinal cord impact site 7d after injury _vs_ sham–injury                                                                           | + | 599  | 1.80E–18 |
| 148 | Infection                | GSE5555     | Lungs– Nippostrongylus brasiliensis infected _vs_ uninfected mice                                                                  | + | 475  | 1.90E–18 |
| 149 | Comparison of tissues    | GSE6933     | Mouse marrow stromal cells _vs_ embryonic stem cells                                                                               | + | 803  | 2.00E–18 |
| 150 | Genetic modification     | GSE7676     | E12.5 placenta– pcdh12 KO _vs_ wildtype                                                                                            | + | 326  | 3.00E–18 |
| 151 | Neurodegeneration        | GSE3621     | Brain from 27wk old mice – R6/1 Huntington’s model _vs_ wildtype                                                                   | – | 282  | 3.10E–18 |
| 152 | Drug treatment           |             | Splenic macrophages from aged mice – treated 6hr with 1ug per mL LPS _vs_ untreated                                                | – | 496  | 3.30E–18 |
| 153 | Comparison of tissues    | GSE3483     | Mouse satellite cells in activated state _vs_ non myogenic cells                                                                   | – | 548  | 3.40E–18 |
| 154 | Comparison of tissues    | GSE15209    | Oligoastrocytoma _vs_ normal brain cortex                                                                                          | – | 658  | 3.50E–18 |
| 155 | Genetic modification     | GSE2372     | Aorta of 32 week old mice – ApoE KO _vs_ wildtype                                                                                  | + | 181  | 4.00E–18 |
| 156 | Relative gene expression | GSE1479     | E10.5 whole heart – relative gene expression compared to the median of its expression across 5 brain regions in 6 strains          | – | 1411 | 4.50E–18 |
| 157 | Injury                   | GSE7404     | WBC from spleen after burn injury sham at 1d _vs_ 2hr                                                                              | + | 307  | 4.50E–18 |
| 158 | Aging                    | GSE3501     | Mammary glands from mice overexpressing LH and erbb2 – 10wk _vs_ 5wk                                                               | – | 503  | 4.70E–18 |
| 159 | Aging                    | E–MEXP–878  | Mice hippocampal neurons differentiating for 16d _vs_ 0.25d                                                                        | + | 675  | 5.00E–18 |
| 160 | Genetic modification     | GSE11897    | P0.5 ovarian tissue from LHX8 null mice _vs_ WT_GPL1261                                                                            | + | 514  | 7.10E–18 |
| 161 | Treatment                | GSE13432    | White adipose tissue of mouse housed at 4 degrees 1wk _vs_ room temperature                                                        | – | 537  | 7.80E–18 |
| 162 | Neurodegeneration        | E–MEXP–1005 | Brain from ME7–inoculated mice after 150d _vs_ not inoculated                                                                      | + | 190  | 7.90E–18 |
| 163 | Genetic modification     | GSE15303    | Oligodendrocytes Myelin–gene Regulatory Factor heterozygote _vs_ oligodendrocyte progenitors                                       | + | 592  | 8.30E–18 |
| 164 | Relative gene expression | GSE4734     | 129S6_SvEvTac pituitary gland – relative gene expression                                                                           | – | 1411 | 8.40E–18 |
| 165 | Drug treatment           | GSE7793     | Kidney of mice treated IP 7d with vancomycin 400mg–kg–d _vs_ saline                                                                | + | 861  | 9.40E–18 |
| 166 | Not categorized yet      | GSE15267    | Pluripotent cells induced from serum–free fibroblast + Oct4 +Sox2 +Klf4 _vs_ serum–free MEFs                                       | – | 409  | 9.80E–18 |
| 167 | Aging                    | GSE2154     | Chondrocyte micromass cultures from E11.5 limb buds differentiated for 12d _vs_ 3d                                                 | + | 387  | 1.10E–17 |
| 168 | Genetic modification     | GSE8156     | Untreated granulosa cell tumor of Smad8+/– Smad1 Smad5 flox KO _vs_ WT granulosa cells+PMSG                                        | + | 409  | 1.30E–17 |
| 169 | TRAP                     | GSE13379    | TRAP Drd1+ medium spiny neuronal RNA from mouse striatum _vs_ unbound RNA                                                          | + | 354  | 1.40E–17 |
| 170 | Infection                | GSE8966     | Liver from SCID mice + Liberty strain E. chaffeensis 15d _vs_ mock infected                                                        | + | 398  | 1.40E–17 |
| 171 | Tumor                    | GSE6482     | Kaposi–like tumor _vs_ mECK36 cells post KSHVBac36 transfection                                                                    | + | 252  | 1.40E–17 |
| 172 | Aging                    | GSE2297     | Female brain 8–wk _CHGN vs 1 wk                                                                                                    | + | 272  | 1.60E–17 |
| 173 | Infection                | GSE17509    | Splenocytes CD45 heterozygotes expressing 62% normal levels of CD45 + EBOV 9d _vs_ uninfected                                      | + | 667  | 1.80E–17 |
| 174 | Genetic modification     | GSE12073    | Pancreatic islets of NOD Rats– insulin promoter driven AIRE expression _vs_ nontransgenic islets                                   | + | 301  | 1.90E–17 |
| 175 | Not categorized yet      | GSE5350     | Ambion human brain reference RNA _vs_ Stratagene universal reference RNA_Affy platform_GPL570                                      | + | 885  | 1.90E–17 |
| 176 | Injury                   | E–MEXP–703  | Skeletal muscle 12d post cardiotoxin injury in CnAa transgenic mice _vs_ untreated                                                 | + | 313  | 1.90E–17 |

|     |                       |             |                                                                                                   |   |      |          |
|-----|-----------------------|-------------|---------------------------------------------------------------------------------------------------|---|------|----------|
| 177 | Infection             | E-MEXP-1190 | Spleen from C57BL-6 mice T. congolense-infected for 9d _vs_ uninfected                            | - | 463  | 2.10E-17 |
| 178 | Genetic modification  | GSE10000    | Aorta of 32wk old mice - ApoE null _vs_ wildtype_GPL1261                                          | + | 197  | 2.20E-17 |
| 179 | Drug treatment        | GSE12466    | CD3+ T-cells from C57BL mouse + 1 mg/ml anti-CD3 + 3 mg/ml anti/CD28 _vs_ untreated               | - | 402  | 2.20E-17 |
| 180 | Drug treatment        | GSE12333    | Embryoid bodies derived from D3 ES cell line + retinoic acid 10d _vs_ control                     | - | 362  | 2.70E-17 |
| 181 | Infection             | GSE7814     | Brain of cerebral-malaria-susceptible mice infected for 6 days _vs_ uninfected                    | + | 208  | 3.20E-17 |
| 182 | Aging                 | GSE11186    | Dorsal skin of mouse during second postnatal hair growth cycle - 44d postnatal _vs_ 23d postnatal | + | 437  | 3.30E-17 |
| 183 | Drug treatment        | GSE18341    | Lungs of 16wk adult C57BL6 mice + LPS 30min + mechanical ventilation 2hr _vs_ untreated 2hr       | - | 510  | 4.40E-17 |
| 184 | Comparison of tissues | GSE9763     | Postnatal glial progenitor cells- transformed _vs_ normal                                         | + | 673  | 5.30E-17 |
| 185 | Genetic modification  | GSE10784    | Hippocampus from Df(16)A+ mouse model of human 22q11 microdeletion syndrome _vs_ wildtype         | + | 144  | 5.40E-17 |
| 186 | Genetic modification  | GSE15303    | Oligodendrocytes Myelin-gene Regulatory Factor conditional KO _vs_ oligodendrocyte progenitors    | + | 601  | 5.50E-17 |
| 187 | Drug treatment        | GSE12466    | CD3+ T-cells from C57BL mouse + 1 mg/ml anti-CD3 _vs_ untreated                                   | - | 394  | 6.50E-17 |
| 188 | Drug treatment        | GSE17886    | Two-cell embryo from maternal pronuclei strain C57BL-6 treated with alpha-amanitin _vs_ untreated | + | 1010 | 7.90E-17 |
| 189 | Aging                 | GSE2154     | Chondrocyte micromass cultures from E11.5 limb buds differentiated for 9d _vs_ 3d                 | + | 325  | 8.20E-17 |
| 190 | Drug treatment        | GSE11898    | Mesangial cells of kidney stimulated 6hr with double stranded DNA _vs_ lipofectamine control      | - | 394  | 8.80E-17 |
| 191 | TRAP                  | GSE13394    | Drd2 subclass of medium spiny neurons from mouse striatum - TRAP purified _vs_ unbound RNA        | + | 441  | 1.00E-16 |
| 192 | Tumor                 | GSE6482     | Kaposi-like tumor _vs_ mEC cells + empty vector                                                   | + | 545  | 1.00E-16 |
| 193 | Aging                 | GSE2154     | Chondrocyte micromass cultures from E11.5 limb buds differentiated for 15d _vs_ 3d                | + | 342  | 1.10E-16 |
| 194 | Aging                 | GSE4818     | Testes gestational day18 _vs_ day11                                                               | + | 602  | 1.40E-16 |
| 195 | Drug treatment        | GSE15457    | RAW264.7 mouse macrophages + 2.1 mM HOCl 6hr _vs_ untreated                                       | - | 382  | 1.40E-16 |
| 196 | Treatment             | GSE15129    | Liver of 14mo old SAMP1 mouse fed diet supplemented with reduced coenzyme Q10 _vs_ control diet   | + | 212  | 1.50E-16 |
| 197 | Aging                 | GSE5333     | Epididymus pnd2 _vs_ gd12                                                                         | + | 296  | 1.80E-16 |
| 198 | Comparison of tissues | GSE15209    | Glioblastoma _vs_ normal brain cortex                                                             | - | 725  | 1.80E-16 |
| 199 | Drug treatment        | GSE17880    | Spleen of mice treated with 900mg/kg/d 2-butoxyethanol 7d _vs_ vehicle                            | - | 847  | 1.80E-16 |
| 200 | Comparison of tissues | GSE15580    | Adult mouse Sca1-low transit-amplifying cells _vs_ embryonic prostate stem cells                  | + | 575  | 1.80E-16 |
| 201 | Neurodegeneration     | E-MEXP-1005 | Brain from mice after 120d ME7-inoculated _vs_ mock                                               | + | 119  | 2.10E-16 |
| 202 | Comparison of tissues | GSE10871    | MEF derived partly reprogrammed SSEA+ MCV8 cells with Oct4 Klf4 C-Myc Sox2 _vs_ Oct4 MVC8 iPS     | + | 685  | 2.20E-16 |
| 203 | Treatment             | GSE17825    | Femur fracture tissue in 6wk old mice 5d post fracture _vs_ 1d post fracture                      | + | 720  | 2.20E-16 |
| 204 | Neurodegeneration     | E-MEXP-1005 | Brain from mice after 150d ME7-inoculated _vs_ mock                                               | + | 200  | 2.50E-16 |
| 205 | Aging                 | GSE17783    | Callosal projection neurons - P14 _vs_ E18                                                        | + | 259  | 2.60E-16 |
| 206 | Not categorized yet   | GSE5876     | Lacrimal gland from female MPR-lpr mice _vs_ Non-obese diabetic female mice_GPL339                | + | 189  | 2.60E-16 |
| 207 | Genetic modification  | GSE12956    | Telencephalon of E14.5 embryo - Arx mutant _vs_ WT                                                | + | 344  | 2.70E-16 |
| 208 | Genetic modification  | GSE5037     | Spinal cord from SOD1-null mice _vs_ wild-type                                                    | + | 120  | 3.00E-16 |
| 209 | Aging                 | GSE18567    | Cochlea of nicotinic cholinergic receptor (alpha9 subunit) null mice - P60 _vs_ P3                | + | 425  | 3.00E-16 |
| 210 | Comparison of tissues | GSE15767    | Non-immunized subcapsular sinus macrophages of female C57BL/6 mice _vs_ medullary macrophages     | - | 409  | 3.10E-16 |
| 211 | Treatment             | GSE6858     | Lung from wildtype mice + allergen ovalbumin _vs_ vehicle control                                 | + | 346  | 3.20E-16 |
| 212 | Drug treatment        | E-TABM-310  | Macrophages from wild type rat + PAM2 60min _vs_ untreated                                        | - | 357  | 3.20E-16 |
| 213 | Aging                 | GSE15452    | Lung of FGFR3 FGFR4 double knockout mice - 28d old _vs_ 1d old                                    | + | 577  | 3.50E-16 |
| 214 | Genetic modification  | GSE10849    | Heart from caveolin-1 knockout mice _vs_ wildtype                                                 | + | 150  | 3.50E-16 |

|     |                          |             |                                                                                                                                                                                                      |   |      |          |
|-----|--------------------------|-------------|------------------------------------------------------------------------------------------------------------------------------------------------------------------------------------------------------|---|------|----------|
| 215 | Infection                | E-MEXP-1190 | Liver from C57BL-6 mice T. congolense-infected for 7d _vs_ uninfected                                                                                                                                | + | 296  | 3.80E-16 |
| 216 | Infection                | GSE8025     | FVBN mouse colon infected 9d _vs_ non-infected                                                                                                                                                       | - | 594  | 4.50E-16 |
| 217 | Comparison of tissues    | GSE12618    | Embryonic bladder mesenchymal cells _vs_ epithelial cells                                                                                                                                            | + | 367  | 4.50E-16 |
| 218 | Neurodegeneration        | E-MEXP-1005 | Brain from ME7-inoculated mice after 120d _vs_ not inoculated                                                                                                                                        | + | 195  | 4.70E-16 |
| 219 | Comparison of tissues    | GSE11274    | Germline pluripotent stem cells derived from adult Oct4-GFP GSCs _vs_ MEFS from E12.5 mice<br>Mammary tumor from MMTV-MYC mice of Epithelial-Mesenchymal Transition subtype _vs_ MMTV-<br>Neu tumors | - | 829  | 5.40E-16 |
| 220 | Tumor                    | GSE15904    |                                                                                                                                                                                                      | + | 577  | 5.70E-16 |
| 221 | Drug treatment           | GSE3293     | Gallbladders of leptin deficient obese mice + Leptin _vs_ Saline injections                                                                                                                          | + | 344  | 5.90E-16 |
| 222 | Infection                | GSE7814     | Cerebral-malaria-susceptible infected by Plasmodium for 6 days _vs_ cerebral-malaria resistant                                                                                                       | + | 179  | 6.10E-16 |
| 223 | Comparison of tissues    | GSE7809     | Mouse ICC from Myenteric Plexus _vs_ Tunica Muscularis                                                                                                                                               | - | 289  | 7.30E-16 |
| 224 | Drug treatment           | GSE6674     | AM14 B cells+anti-IgM+CpG _vs_ AM14 B cells untreated                                                                                                                                                | - | 382  | 7.40E-16 |
| 225 | Treatment                | GSE23006    | Mucosa of tongue from Balb-c mice - 10d post-wound _vs_ unwounded                                                                                                                                    | + | 298  | 7.50E-16 |
| 226 | Drug treatment           | GSE6689     | Stem cells+growth factor stimulation-Time point 2 _vs_ naive                                                                                                                                         | + | 450  | 8.40E-16 |
| 227 | Infection                | E-MEXP-1190 | Spleen from C57BL-6 mice T. congolense-infected for 3d _vs_ uninfected                                                                                                                               | - | 270  | 8.50E-16 |
| 228 | Relative gene expression | GSE4734     | DBA_2J periaqueductal gray - relative gene expression compared to the median of its expression<br>across 5 brain regions in 6 strains                                                                | - | 1411 | 8.80E-16 |
| 229 | Drug treatment           | GSE13044    | Fetal livers from timed pregnant mice exposed gestation days 1-17 - 3mg/kg/day PFOA _vs_ vehicle                                                                                                     | - | 274  | 9.80E-16 |
| 230 | Aging                    | GSE18567    | Cochlea of wildtype mice - P60 _vs_ P3                                                                                                                                                               | + | 343  | 9.90E-16 |
| 231 | Tumor                    | GSE11859    | Olig2-tva-cre:SmoM2 mice - Cerebellar tumor _vs_ non-tumor cerebellar tissue                                                                                                                         | - | 635  | 1.10E-15 |
| 232 | Treatment                | GSE19403    | Demyelinated spinal cord white matter from wildtype mice - induced by lysolecithin 15d _vs_ 4d                                                                                                       | + | 633  | 1.10E-15 |
| 233 | Injury                   | GSE5296     | Spinal cord impact site 28d after injury _vs_ sham-injury                                                                                                                                            | + | 388  | 1.20E-15 |
| 234 | Aging                    | GSE15452    | Lung of FGFR3 FGFR4 double heterozygous mice - 28d old _vs_ 1d old                                                                                                                                   | + | 654  | 1.30E-15 |
| 235 | Drug treatment           | GSE18660    | CGR8 ESC differentiated 5d treated 10d with 1mM 1-ethyl-2-benzimidazolinone _vs_ untreated 10d                                                                                                       | - | 512  | 1.30E-15 |
| 236 | Infection                | GSE18293    | Liver of Braun lipoprotein KO mutant Y. pestis infected mouse at 48hr post infection _vs_ uninfected                                                                                                 | + | 571  | 1.40E-15 |
| 237 | Aging                    | GSE16585    | Retina overexpressing Nr1 - 28d old mice _vs_ 14d                                                                                                                                                    | - | 318  | 1.50E-15 |
| 238 | Comparison of tissues    | GSE15330    | Ikaros-shRNA transfected - megakaryo-erythrocyte progenitors _vs_ hematopoietic stem cells                                                                                                           | - | 378  | 1.50E-15 |
| 239 | Genetic modification     | GSE10634    | Kidney of P7 aquaporin 11 knockout mouse _vs_ wildtype                                                                                                                                               | + | 292  | 1.60E-15 |
| 240 | Genetic modification     | GSE13104    | Osteosarcoma arisen from p53 heterozygous mouse _vs_ mc3T3 mouse osteoblast                                                                                                                          | + | 480  | 1.60E-15 |
| 241 | Comparison of tissues    | GSE13074    | Retinal pigment epithelium from light damaged BALBc mice _vs_ dark adapted                                                                                                                           | + | 122  | 1.70E-15 |
| 242 | TRAP                     | GSE13379    | TRAP motor neuronal RNA from mouse brainstem _vs_ unbound RNA                                                                                                                                        | - | 605  | 1.80E-15 |
| 243 | TRAP                     | GSE13394    | Motor neurons from mouse brainstems - TRAP purified _vs_ unbound RNA                                                                                                                                 | - | 601  | 2.10E-15 |
| 244 | Infection                | E-MEXP-1190 | Liver from BALBc mice T. congolense-infected for 7d _vs_ uninfected                                                                                                                                  | + | 392  | 2.10E-15 |
| 245 | Infection                | E-MEXP-1190 | Liver from A J mice T. congolense-infected for 7d _vs_ uninfected                                                                                                                                    | + | 493  | 2.20E-15 |
| 246 | Aging                    | GSE5334     | Gonad development at pnd 2 _vs_ gd12<br>C57BL_6J periaqueductal gray - relative gene expression compared to the median of its expression<br>across 5 brain regions in 6 strains                      | + | 487  | 2.40E-15 |
| 247 | Relative gene expression | GSE4734     |                                                                                                                                                                                                      | - | 1411 | 2.50E-15 |
| 248 | Drug treatment           | GSE18800    | Mouse lung wildtype 14d after intratracheal bleomycin 1 mg/kg _vs_ no bleomycin                                                                                                                      | + | 564  | 2.70E-15 |
| 249 | Genetic modification     | GSE16389    | Villi enterocytes from transgenic mice with mutant Fabpi-SV40 TAg-N132 _vs_ non-transgenic mice                                                                                                      | - | 328  | 2.70E-15 |
| 250 | Genetic modification     | GSE23908    | Ovaries from E16 embryos lacking germ cells (homozygous Kit W-v mutation) _vs_ wildtype                                                                                                              | + | 309  | 3.30E-15 |
| 251 | Aging                    | GSE18597    | Spinal cord SOD1 G93A mutant - 126 day old _vs_ 28 day old                                                                                                                                           | + | 504  | 3.50E-15 |

|     |                          |          |                                                                                                                             |   |      |          |
|-----|--------------------------|----------|-----------------------------------------------------------------------------------------------------------------------------|---|------|----------|
| 252 | Injury                   | GSE5296  | Spinal cord below impact site 24h after injury _vs_ naive                                                                   | + | 112  | 4.00E-15 |
| 253 | Drug treatment           | GSE6689  | Stem cells+growth factor stimulation-Time point 3 _vs_ naive                                                                | + | 258  | 4.00E-15 |
| 254 | Infection                | GSE6765  | Small intestine from A. caviae-infected mice _vs_ uninfected                                                                | + | 202  | 4.00E-15 |
| 255 | Not categorized yet      | GSE17617 | C57BL6J X DBA2J mouse orexin-expressing neurons _vs_ whole brain                                                            | - | 916  | 4.40E-15 |
| 256 | Drug treatment           | GSE17297 | Mesentery from DBA mice 3d post-intraperitoneal injection 0.5 ml pristane _vs_ untreated control                            | + | 512  | 4.60E-15 |
| 257 | Drug treatment           | GSE12466 | CD3+ T-cells + 1 mg/ml anti-CD3 from Itk KO C57BL mouse _vs_ wildtype C57BL                                                 | + | 251  | 4.70E-15 |
| 258 | Treatment                | GSE4066  | Dorsal skin CD-1 mice + DMSO & UV irradiation 24h _vs_ sham irradiation                                                     | + | 233  | 5.00E-15 |
| 259 | Not categorized yet      | GSE3234  | Hematopoietic cells- downstream progenitors (Sca-1-cKit+) _vs_ bone marrow                                                  | - | 317  | 5.70E-15 |
| 260 | Genetic modification     | GSE15541 | Bone marrow transformed with NUP98-HOXD13 + M33-MEIS1 fusion overexpression _vs_ control                                    | - | 413  | 7.50E-15 |
| 261 | Tumor                    | GSE9355  | Sorted mammary tumor from WT mice _vs_ hyperplastic mammary cells                                                           | - | 234  | 7.50E-15 |
| 262 | Genetic modification     | GSE16585 | Retina of 14d old mice - Nr1 overexpression and Rorb KO _vs_ wildtype                                                       | + | 542  | 8.20E-15 |
| 263 | Relative gene expression | GSE2882  | Cingulate cortex_GIN_GABA neurons homogenate - relative gene expression                                                     | + | 929  | 9.00E-15 |
| 264 | Injury                   | GSE7404  | WBC from spleen at 1d after burn injury _vs_ burn injury sham                                                               | - | 605  | 9.80E-15 |
| 265 | Drug treatment           | GSE18341 | Lungs of 16wk adult C57BL6 mice + LPS 30min + spontaneous breathing 2hr _vs_ untreated 2hr                                  | - | 488  | 1.00E-14 |
| 266 | Treatment                | GSE5555  | Lungs with resolved N. brasiliensis infection- 72hr post HDM in PBS challenge _vs_ no challenge                             | - | 538  | 1.00E-14 |
| 267 | Injury                   | GSE5296  | Spinal cord below impact site 7d after injury _vs_ naive                                                                    | + | 339  | 1.10E-14 |
| 268 | Tumor                    | GSE14038 | Primary tumor plexiform neurofibroma _vs_ universal tissue reference                                                        | + | 722  | 1.10E-14 |
| 269 | Genetic modification     | GSE6789  | IRAK4-KD MEFs IL1b-stimulated 1h _vs_ wildtype                                                                              | + | 220  | 1.10E-14 |
| 270 | Comparison of tissues    | GSE6259  | DCs from WT mice sorted for - 33D1+ _vs_ DEC205+                                                                            | + | 381  | 1.10E-14 |
| 271 | Aging                    | GSE5333  | Epididymus gd14 _vs_ gd12                                                                                                   | + | 382  | 1.20E-14 |
| 272 | Not categorized yet      | GSE3792  | ES-D3 cells differentiated 16d toward osteoblasts _vs_ undirected                                                           | + | 427  | 1.20E-14 |
| 273 | Aging                    | GSE21716 | Livers from C57Bl6J mice at 18mo (old age) _vs_ 6mo (young adult)                                                           | + | 98   | 1.30E-14 |
| 274 | Comparison of tissues    | GSE17955 | Amygdala from 3-4mo old C57BL/6J mice _vs_ hippocampus                                                                      | - | 79   | 1.40E-14 |
| 275 | Relative gene expression | GSE4734  | A_J pituitary gland - relative gene expression compared to the median of its expression across 5 brain regions in 6 strains | - | 1411 | 1.50E-14 |
| 276 | Tumor                    | GSE21603 | Colon from BCL9 BCL9L double KO mice - dimethylhydrazine induced colon tumor _vs_ normal epithelium                         | + | 650  | 1.70E-14 |
| 277 | Not categorized yet      | GSE11141 | NgR bitransgenic overexpression in mature brain dentate gyrus _vs_ developing brain                                         | + | 202  | 1.80E-14 |
| 278 | Aging                    | GSE19626 | Eyes of wildtype mice - E16.5 embryos _vs_ E10.5                                                                            | + | 409  | 1.90E-14 |
| 279 | Genetic modification     | GSE9892  | Liver from TGFBeta1 null mice _vs_ wildtype                                                                                 | + | 413  | 1.90E-14 |
| 280 | Comparison of tissues    | GSE15330 | Wildtype megakaryo-erythrocyte progenitors _vs_ hematopoietic stem cells                                                    | - | 474  | 2.00E-14 |
| 281 | Aging                    | GSE5334  | Gonad development at pnd 2 _vs_ gd14                                                                                        | + | 420  | 2.10E-14 |
| 282 | Comparison of tissues    | GSE13394 | Purkinje neurons from cerebellum _vs_ motor neurons from brainstem                                                          | - | 784  | 2.20E-14 |
| 283 | Treatment                | GSE19322 | Non-infarct region of left ventricle of MRL mice - 5d after myocardial infarction _vs_ healthy                              | + | 368  | 2.20E-14 |
| 284 | Treatment                | GSE5555  | Lungs with resolved N. brasiliensis infection- 6hr post PBS challenge _vs_ no challenge                                     | - | 424  | 2.40E-14 |
| 285 | Not categorized yet      | GSE5350  | Ambion human brain reference RNA _vs_ Stratagene universal reference RNA_Illumina plat_GPL2507                              | + | 735  | 2.40E-14 |
| 286 | Comparison of tissues    | GSE15724 | Tracheal epithelium- basal cells ( KRT5-GFP- lectin+) _vs_ columnar cells ( KRT5-GFP- lectin-).1                            | + | 301  | 2.40E-14 |
| 287 | Not categorized yet      | GSE10913 | Murine decidual response in uterine stroma Bmp2 ff uterus horn _vs_ Bmp2 dd uterus horn                                     | - | 245  | 2.50E-14 |
| 288 | Aging                    | GSE5334  | Gonad development at pnd 0.5 _vs_ gd12                                                                                      | + | 519  | 2.60E-14 |



|     |                          |             |                                                                                                                                                    |   |      |          |
|-----|--------------------------|-------------|----------------------------------------------------------------------------------------------------------------------------------------------------|---|------|----------|
| 289 | Tumor                    | GSE15460    | Pool of gastric cancer cell lines _vs_ primary gastric tumors_GPL570                                                                               | - | 743  | 2.60E-14 |
| 290 | Comparison of tissues    | GSE13394    | Drd2 subclass of medium spiny neurons from mouse striatum _vs_ motor neurons from brainstem                                                        | + | 781  | 2.70E-14 |
| 291 | Drug treatment           | E-TABM-141  | Min6 B1 pancreatic beta cells pretreated with CHX- chlorophenylthio-cAMP + glucose _vs_ no treatment                                               | - | 432  | 2.70E-14 |
| 292 | Comparison of tissues    | GSE13408    | Wildtype Embryoid body _vs_ Embryonic Stem Cells                                                                                                   | + | 481  | 2.70E-14 |
| 293 | Neurodegeneration        | GSE23182    | Hippocampal tissue from mice inoculated with ME7 prion + 500ug/kg LPS 18wk after _vs_ saline                                                       | + | 198  | 2.80E-14 |
| 294 | Tumor                    | GSE14038    | Primary tumor dermal neurofibroma _vs_ universal tissue reference                                                                                  | + | 744  | 2.80E-14 |
| 295 | Infection                | GSE11494    | NALT from mice infected with attenuated S. pyogenes lacking M1 and SCPA proteins _vs_ sham infected                                                | + | 140  | 2.80E-14 |
| 296 | Infection                | GSE13522    | Skin from Balb/c mice infected by Trypanosoma cruzi Y strain 24hr _vs_ saline control                                                              | + | 349  | 2.80E-14 |
| 297 | Not categorized yet      | GSE10011    | NIH-3T3 labelled 30min 200uM 4-thiouridine - newly transcribed RNA _vs_ total cellular RNA                                                         | - | 832  | 2.90E-14 |
| 298 | Infection                | E-MEXP-1190 | Liver from C57BL-6 mice T. congolense-infected for 17d _vs_ uninfected                                                                             | + | 608  | 3.00E-14 |
| 299 | Injury                   | GSE5296     | Spinal cord above impact site 7d after injury _vs_ naive                                                                                           | + | 248  | 3.10E-14 |
| 300 | Relative gene expression | GSE4734     | DBA_2J bed nucleus of the stria terminalis - relative gene expression compared to the median of its expression across 5 brain regions in 6 strains | + | 1411 | 3.40E-14 |
