# Supplementary material for: Deficiency of Schnurri-2, an MHC Enhancer Binding Protein, Induces Mild Chronic Inflammation in the Brain and Confers Molecular, Neuronal, and Behavioral Phenotypes Related to Schizophrenia
Source: PubMed Central journal article supplement — Neuropsychopharmacology. 2013 Mar 6;38(8):1409–25. doi: 10.1038/npp.2013.38 (PMC3682135; doi:10.1038/npp.2013.38), 2013-03-06
Supplement: npp201338x8.pdf [file npp201338x8.pdf]

Supplementary Table 8. Comprehensive comparison of gene expression patterns in human brain disorders and Shn-2 KO mice.

| Shn-2 KO PFC                            |                                                                                                 | Homo Sapiens, mental or neuronal disorder, Postmortem brain, disease vs normal |                                                                                                     |       |          |             |              |                      |         |     |         |                      |         |    |         |
|-----------------------------------------|-------------------------------------------------------------------------------------------------|--------------------------------------------------------------------------------|-----------------------------------------------------------------------------------------------------|-------|----------|-------------|--------------|----------------------|---------|-----|---------|----------------------|---------|----|---------|
| Disease                                 | Study Name                                                                                      | Series ID                                                                      | BioSet Name                                                                                         | Score | P value  | Correlation | Common Genes | Positive Correlation |         |     |         | Negative Correlation |         |    |         |
|                                         |                                                                                                 |                                                                                |                                                                                                     |       |          |             |              | ↑↑                   | P value | ↓↓  | P value | ↑↓                   | P value | ↓↑ | P value |
| Schizophrenia                           | Post-mortem tissue from brain BA10 region of schizophrenic and control patients                 | GSE17612                                                                       | Brain BA10 from all schizophrenic samples _vs_ controls above control group mean pH6.5              | 6     | 9.50E-14 | +           | 100          | 34                   | 6.1E-13 | 42  | 3.6E-16 | 16                   | 0.0790  | 8  | 0.3047  |
| Tuberous sclerosis                      | Gene expression in cortical tubers isolated from tuberous sclerosis complex patients            | GSE16969                                                                       | Postmortem cortical tuber tissue from tuberous sclerosis complex patients _vs_ unaffected           | 5     | 1.50E-11 | +           | 275          | 84                   | 3.5E-15 | 81  | 7.2E-09 | 68                   | 0.5150  | 47 | 0.2073  |
| HIV-associated neurocognitive disorders | Brain tissue from postmortem patients with HIV-associated neurocognitive disorders              | GSE28160                                                                       | Brains of HIV-associated neurocognitive disorder patients _vs_ healthy HIV-negative controls        | 5     | 2.80E-11 | +           | 215          | 62                   | 4.6E-15 | 65  | 2.5E-15 | 69                   | 2.9E-07 | 25 | 0.5021  |
| Alzheimer                               | Pyramidal cell gene expression from brain regions in Alzheimer's disease and normal aged brains | GSE5281                                                                        | Pyramidal cells from primary visual cortex of Alzheimer patient brains _vs_ from aged normal brains | 4     | 3.90E-10 | +           | 272          | 69                   | 4.8E-06 | 116 | 7.6E-15 | 63                   | 0.9515  | 39 | 0.2483  |
| Alzheimer                               | Alzheimer's disease with and without neurofibrillary tangles                                    | GSE4757                                                                        | Alzheimer's disease neurons - with neurofibrillary tangles _vs_ normal                              | 3     | 2.50E-08 | +           | 113          | 31                   | 1.7E-07 | 43  | 5.9E-13 | 28                   | 0.0007  | 12 | 0.2092  |
| Autism spectrum disorder                | Cerebellum, frontal cortex, and temporal cortex gene expression from ASD patients               | GSE28521                                                                       | Prefrontal cortex of autism spectrum disorder (ASD) patients _vs_ healthy donor                     | 3     | 4.10E-08 | +           | 58           | 24                   | 3.1E-09 | 19  | 1.9E-07 | 10                   | 0.6076  | 5  | 0.5696  |
| Parkinson's disease                     | Substantia nigra and frontal gyrus brain regions in Parkinson's disease patients                | GSE8397                                                                        | Medial substantia nigra from Parkinson's disease patients _vs_ normal donors                        | 3     | 4.90E-07 | +           | 135          | 33                   | 6.2E-05 | 56  | 1.3E-07 | 31                   | 0.4574  | 15 | 0.7685  |
| Huntingtons disease                     | Huntington's disease - Cerebellum, Caudate nucleus, Motor cortex BA4, and Prefrontal cortex BA9 | GSE3790                                                                        | Prefrontal Cortex BA9- Huntingtons disease grade 0 _vs_ control_GPL96                               | 3     | 7.60E-07 | -           | 65           | 9                    | 0.1259  | 9   | 0.081   | 18                   | 2.6E-05 | 29 | 2.3E-10 |
| Schizophrenia                           | Neuroinflammatory pathways of different neurodegenerative diseases                              | GSE26927                                                                       | Grey matter in Brodmann area of Schizophrenia patients _vs_ normal controls                         | 2     | 3.70E-05 | +           | 58           | 10                   | 0.0550  | 11  | 0.2555  | 8                    | 0.2638  | 29 | 7.5E-11 |
| Schizophrenia                           | Prefrontal cortex gene expression in schizophrenic patients at different stages of illness      | GSE21138                                                                       | Prefrontal cortex Brodmann area 46 - schizophrenics with intermediate DOI _vs_ healthy controls     | 2     | 7.10E-05 | +           | 77           | 14                   | 0.0492  | 35  | 9.1E-10 | 18                   | 0.3584  | 13 | 0.0247  |
| Schizophrenia                           | Prefrontal cortex gene expression in schizophrenic patients at different stages of illness      | GSE21138                                                                       | Prefrontal cortex Brodmann area 46 - schizophrenics with long DOI _vs_ healthy controls             | 2     | 8.40E-05 | +           | 19           | 3                    | 0.0082  | 11  | 2.2E-08 | 3                    | 0.1520  | 2  | 0.1674  |
| Downs Syndrome                          | Downs Syndrome brains                                                                           | GSE5390                                                                        | Postmortem brain Downs syndrome _vs_ healthy controls                                               | 2     | 8.40E-05 | +           | 165          | 62                   | 0.0007  | 44  | 3.5E-07 | 40                   | 0.0374  | 22 | 0.9379  |
| Parkinson's disease                     | Substantia nigra gene expression in Parkinson's disease patients                                | GSE20292                                                                       | Postmortem brain whole substantia nigra from Parkinsons disease patients _vs_ unaffected            | 1     | 9.00E-04 | +           | 60           | 21                   | 0.0029  | 22  | 3.9E-05 | 9                    | 0.8082  | 8  | 0.1563  |
| Alzheimer                               | Genetic control of human brain transcript expression in Alzheimer's disease                     | GSE15222                                                                       | Cortical tissue from male Alzheimer's disease patients _vs_ male normal parietal cortex             | 2     | 0.0001   | +           | 193          | 43                   | 0.0174  | 66  | 8.3E-10 | 65                   | 0.0014  | 24 | 0.5513  |
| Alzheimer                               | Hippocampal gene expression from Alzheimer's disease patients of varying severity               | GSE1297                                                                        | Hippocampal CA1 from severe Alzheimer's disease patients (MMSE<14) _vs_ control (MMSE>25)           | 2     | 0.0002   | +           | 98           | 22                   | 0.0003  | 37  | 1.3E-07 | 30                   | 0.0053  | 10 | 0.2200  |
| Bipolar                                 | Endothelial and neuronal cells from normal, bipolar, and schizophrenia patients                 | GSE12679                                                                       | Neurons of dorsolateral prefrontal cortex of postmortem bipolar patients _vs_ control               | 2     | 0.0002   | +           | 53           | 13                   | 0.0012  | 23  | 9.0E-07 | 13                   | 0.0578  | 5  | 0.3644  |
| Parkinson's disease                     | Substantia nigra from Parkinson's disease patients                                              | GSE7621                                                                        | Substantia nigra from Parkinson disease patients _vs_ normal                                        | 1     | 0.001    | +           | 102          | 32                   | 0.1015  | 30  | 1.1E-06 | 16                   | 0.8031  | 24 | 0.1307  |
| Parkinson's disease                     | Substantia nigra of Parkinson's disease patients                                                | GSE20164                                                                       | Substantia nigra collected at autopsy from brains of Parkinsons disease patients _vs_ control       | 1     | 0.0012   | +           | 25           | 11                   | 5.7E-06 | 7   | 0.0466  | 6                    | 0.2701  | 1  | 0.6529  |
| Alzheimer                               | Hippocampus of Alzheimer's disease patients                                                     | GSE28146                                                                       | CA1 hippocampal gray matter from patients with severe Alzheimers Disease _vs_ healthy control       | 1     | 0.0016   | +           | 105          | 29                   | 0.0006  | 35  | 2.4E-05 | 27                   | 0.0522  | 17 | 0.1113  |
| Parkinson's disease                     | Globus pallidus interna from postmortem brains of Parkinson's disease patients                  | GSE20146                                                                       | Globus pallidus interna from Parkinsons disease patients _vs_ unaffected                            | 1     | 0.0019   | +           | 44           | 14                   | 9.7E-05 | 13  | 0.0016  | 12                   | 0.0776  | 5  | 0.5559  |
| Alzheimer                               | Study of synaptic function and neuroplasticity in incipient AD                                  | GSE12685                                                                       | Synaptoneuroosomes from frontal cortex of Alzheimer's Disease patient with normal MMSE _vs_ control | 1     | 0.0058   | -           | 48           | 13                   | 0.8230  | 2   | 0.5446  | 5                    | 0.1514  | 28 | 0.0001  |
| Bipolar                                 | Human adult postmortem brain tissue from subjects with bipolar disorder                         | GSE5392                                                                        | Orbitofrontal cortex from bipolar disorder subjects _CHGN vs healthy control                        | 1     | 0.0092   | +           | 67           | 16                   | 0.0012  | 26  | 0.0049  | 14                   | 0.9310  | 11 | 0.0786  |
| Parkinson's disease                     | Brain regions affected and non-affected by Parkinson's disease (PD) in PD and normal patients   | GSE28894                                                                       | Frontal cortex of Parkinson's disease patients _vs_ normal subjects                                 | 1     | 0.0156   | +           | 62           | 30                   | 3.5E-05 | 8   | 0.3887  | 7                    | 0.9333  | 18 | 0.0594  |

|                     |                                                                                                  |          |                                                                                                    |   |        |   |     |    |        |    |         |    |        |    |                 |
|---------------------|--------------------------------------------------------------------------------------------------|----------|----------------------------------------------------------------------------------------------------|---|--------|---|-----|----|--------|----|---------|----|--------|----|-----------------|
| Parkinson's disease | Putamen gene expression in brains of Parkinson's disease patients                                | GSE20291 | Postmortem brain putamen from male Parkinsons disease patients _vs_ unaffected                     | 1 | 0.0193 | + | 16  | 4  | 0.1444 | 8  | 0.0007  | 2  | 0.4982 | 2  | 0.5243          |
| Parkinson's disease | Substantia nigra pars compacta gene expression in neurons from Parkinson's disease patients      | GSE20141 | Substantia nigra pars compacta neurons from Parkinsons disease patients _vs_ control               | 1 | 0.0204 | + | 136 | 54 | 0.0003 | 30 | 0.1155  | 27 | 0.8151 | 32 | 0.1017          |
| Parkinson's disease | Substantia nigra gene expression in Parkinsons disease patients                                  | GSE20163 | Substantia nigra of Parkinsons disease patients _vs_ unaffected individuals                        | 1 | 0.0271 | + | 43  | 2  | 0.0424 | 20 | 8.5E-05 | 17 | 0.0534 | 4  | 0.0901          |
| Schizophrenia       | Cerebellum expression profile from schizophrenic patients                                        | GSE4036  | Cerebellum from schizophrenic patients _vs_ normal                                                 | 1 | 0.0376 | - | 15  | 3  | 0.1070 | 2  | 0.2391  | 5  | 0.0071 | 5  | 0.0051          |
| Alzheimer           | Astrocyte gene expression in the aging brain related to Alzheimer's pathology and ApoE genotype  | GSE29652 | Astrocytes of Braak stage III-IV Alzheimers patients - APOE e4 positive _vs_ APO e4 negative       | 1 | 0.0415 | - | 7   | 1  | 1.0000 | 1  | 1.0000  | 6  | 0.0034 | 1  | 0.5127          |
| Alzheimer           | Non-amplified RNA microarray analysis and intra and inter-method reproducibility                 | GSE30945 | Brain RNA non-amplified - Alzheimer patient _vs_ pooled normal donors                              | 1 | 0.049  | + | 101 | 33 | 0.0012 | 24 | 0.1580  | 30 | 0.1177 | 15 | 0.6580          |
| Schizophrenia       | Prefrontal cortex expression profile of bipolar disorder, depression, and schizophrenia patients | GSE12654 | Postmortem prefrontal cortex from patients with schizophrenia _vs_ control                         | 1 | 0.0722 | - | 8   | 1  | 0.0981 | 0  | 1       | 6  | 0.0030 | 1  | 0.1675          |
| Leison              | White matter gene expression in lesion areas of patients with fulminant acute multiple sclerosis | GSE32915 | White matter - initial lesions of patients with active MS _vs_ healthy controls                    | 0 | 0.0817 | - | 90  | 5  | 0.6971 | 30 | 0.2787  | 48 | 0.0058 | 7  | 0.2252          |
| Parkinson's disease | Imaging-guided microarray: Identifies molecular markers in the pathogenesis of Parkinson disease | GSE19587 | Inferior olivary nucleus of postmortem brain - Parkinsons _vs_ healthy control                     | 1 | 0.078  | - | 75  | 8  | 0.3639 | 18 | 0.0428  | 40 | 0.0021 | 10 | 0.0441          |
| Parkinson's disease | Substantia nigra from Parkinsons disease patients with incidental Lewy body disease              | GSE20159 | Substantia nigra from Parkinson disease patients with incidental Lewy body disease _vs_ unaffected | 0 | 0.0812 | + | 18  | 6  | 0.0065 | 5  | 0.2422  | 5  | 0.8081 | 2  | 0.2941          |
| Alzheimer           | mRNA expression in parietal lobe cortex in Alzheimer's disease                                   | GSE16759 | Parietal lobe of Alzheimers patients _vs_ healthy controls                                         | 0 | 0.148  | + | 39  | 15 | 0.0371 | 11 | 0.2241  | 9  | 0.5082 | 6  | 0.7473          |
| Rett syndrome       | Superior frontal gyrus of girls with Rett syndrome                                               | GSE6955  | Superior frontal gyrus from girls (2-8years old) with Rett syndrome _vs_ age matched controls      | 0 | 0.1526 | - | 4   | 1  | 0.3812 | 0  | 1       | 1  | 0.0596 | 2  | 0.1490          |
| Bipolar             | Adult postmortem brain tissue (dorsolateral prefrontal cortex) from bipolar disorder             | GSE5388  | Postmortem brain from patient with bipolar disease _vs_ healthy control                            | 0 | 0.1618 | + | 18  | 2  | 0.2635 | 12 | 0.0154  | 3  | 0.8846 | 1  | 0.1754          |
| Parkinson's disease | Dopamine neurons of substantia nigra pars compacta from Parkinsons disease patients              | GSE24378 | Dopamine neurons of substantia nigra pars compacta from Parkinsons disease patients _vs_ controls  | 0 | 0.1733 | - | 58  | 13 | 0.0019 | 12 | 0.3866  | 23 | 0.0069 | 11 | 0.0032          |
| Trisomy 21 and 13   | Trisomy 21 and 13 expression from fetal cerebrum, cerebellum, and heart                          | GSE1397  | Fetal cerebrum with trisomy 21 _vs_ euploid                                                        | 0 | 0.1737 | + | 16  | 4  | 0.3372 | 6  | 0.0579  | 2  | 0.8630 | 4  | 0.7497          |
|                     | Prefrontal cortex expression profile of bipolar disorder, depression, and schizophrenia patients | GSE12654 | Postmortem prefrontal cortex from patients with bipolar disorder _vs_ control                      | 0 | 0.1854 | - | 2   | 0  | 1      | 0  | 1       | 2  | 0.0344 | 0  | 1.0000          |
| ALS                 | Motor neurons from patients with SOD1-related amyotrophic lateral sclerosis (ALS)                | GSE20589 | Motor neurons from cervical spinal cords of ALS patients with SOD1 mutations _vs_ normal controls  | 0 | 0.2012 | - | 59  | 12 | 0.2937 | 18 | 0.1153  | 12 | 0.8851 | 18 | 0.0015          |
| Parkinson's disease | Cerebellum gene expression in Parkinsons disease patients                                        | GSE20314 | Cerebellum of Parkinsons disease patients _vs_ unaffected individuals                              | 0 | 0.5651 | - | 24  | 3  | 0.2976 | 7  | 0.0142  | 8  | 0.0436 | 6  | 0.0308          |
| Major depression    | Frontal cortex of HIV patients with and without major depressive disorder (MDD)                  | GSE17440 | Frontal cortex of HIV patients with major depressive disorder _vs_ w-o major depressive disorder   | 0 | 0.5767 | - | 59  | 21 | 0.1309 | 9  | 0.1550  | 14 | 0.0087 | 16 | 0.7757          |
|                     | Prefrontal cortex expression profile of bipolar disorder, depression, and schizophrenia patients | GSE12654 | Postmortem prefrontal cortex from patients with depression _vs_ control                            |   |        |   |     |    |        |    |         |    |        |    | Not significant |
| Multiple sclerosis  | Brain tissue from multiple sclerosis patients                                                    | GSE5839  |                                                                                                    |   |        |   |     |    |        |    |         |    |        |    | Not significant |

|                    |                                                                                                 |          |                 |
|--------------------|-------------------------------------------------------------------------------------------------|----------|-----------------|
| Multiple sclerosis | Expression data from patients presenting a first demyelinating event (early multiple sclerosis) | GSE19470 | Not significant |
| ALS                | Human motor neuron gene expression in individuals with CHMP2B mutations                         | GSE19332 | Not significant |

---

↑ ↑ genes up-regulated in both Shn-2 KO mice and brain disorder

↓ ↓ genes down-regulated in both Shn-2 KO mice and brain disorder

↑ ↓ genes in up-regulated Shn-2 KO mice and down-regulated in brain disorder

↓ ↑ genes in down-regulated Shn-2 KO mice and down-regulated in brain disorder
