# Supplementary material for: Deficiency of Schnurri-2, an MHC Enhancer Binding Protein, Induces Mild Chronic Inflammation in the Brain and Confers Molecular, Neuronal, and Behavioral Phenotypes Related to Schizophrenia
Source: PubMed Central journal article supplement — Neuropsychopharmacology. 2013 Mar 6;38(8):1409–25. doi: 10.1038/npp.2013.38 (PMC3682135; doi:10.1038/npp.2013.38), 2013-03-06
Supplement: npp201338x9.pdf [file npp201338x9.pdf]

Supplementary Table 9. Expressions of classical inflammatory marker genes in the brains of Shn-2 KO mice and postmortem brains of schizophrenia.

|               |                                             | Shn-2 KO mice                                             |                       |                       |                       |                       |             | SCZ (1)     |            |         | Related supplemental table |        |
|---------------|---------------------------------------------|-----------------------------------------------------------|-----------------------|-----------------------|-----------------------|-----------------------|-------------|-------------|------------|---------|----------------------------|--------|
| Symbol        | Description                                 | Probe ID/<br>ref seq                                      | Assay                 | Area                  | Fold change           | P value               | Probe ID    | Fold change | P value    |         |                            |        |
| Complement    | C1qa                                        | complement component 1, q subcomponent, alpha polypeptide | 1417381_at            | expression microarray | mPFC                  | 1.31                  | 0.0019      | 218232_at   | 1.78       | 1.6E-05 | 2                          |        |
|               |                                             |                                                           |                       | expression microarray | DG                    | 1.28                  | 0.0303      |             |            |         | 4                          |        |
|               | C1qb                                        | complement component 1, q subcomponent, beta polypeptide  | 1437726_x_at          | expression microarray | mPFC                  | 1.37                  | 0.0080      | 202953_at   | 2.38       | 2.6E-05 | 2                          |        |
|               |                                             |                                                           |                       |                       |                       |                       |             |             |            |         |                            |        |
|               | C1qc                                        | complement component 1, q subcomponent, C chain           | 1449401_at            | expression microarray | mPFC                  | 1.39                  | 0.0004      | 225353_s_at | 2.20       | 0.0001  | 2                          |        |
|               |                                             |                                                           |                       | expression microarray | DG                    | 1.33                  | 0.0239      |             |            |         | 4                          |        |
|               | C1q2                                        | complement component 1, q subcomponent-like 2             | 1444687_at            | expression microarray | DG                    | 1.63                  | 0.0088      |             |            |         | 4                          |        |
|               | C1q3                                        | complement component 1, q subcomponent-like 3             | 1425176_at            | expression microarray | DG                    | -1.48                 | 0.0151      |             |            |         | 4                          |        |
| C2            | complement component 2 (within H-2S)        | 1457664_x_at                                              | expression microarray | DG                    | 1.29                  | 0.0223                | 1554533_at  | -1.02       | 0.2710     | 4       |                            |        |
| C4b           | complement component 4B (Chido blood group) | 1418021_at                                                | expression microarray | DG                    | 2.46                  | 0.0028                |             |             |            | 4       |                            |        |
| Cfh           | complement component factor h               | 1423153_x_at                                              | expression microarray | DG                    | 1.57                  | 0.0081                | 213800_at   | 1.02        | 0.4178     | 4       |                            |        |
| HLA-induction | H2-Aa (HLA-DQA1)                            | histocompatibility 2, class II antigen A, alpha           | 1435290_x_at          | expression microarray | mPFC                  | 1.41                  | 0.0060      | 212671_s_at | 1.25       | 0.0788  | 10 (2)                     |        |
|               |                                             |                                                           |                       | expression microarray | DG                    | 2.71                  | 0.0026      |             |            |         | 4                          |        |
|               | H2-Ab1 (HLA-DQB1)                           | histocompatibility 2, class II antigen A, beta 1          | 1450648_s_at          | expression microarray | mPFC                  | 1.27                  | 0.0270      | 212998_x_at | 1.29       | 0.0390  | 2, 10 (2)                  |        |
|               | H2-T23 (HLA-E)                              | histocompatibility 2, class II antigen Q, alpha 1         | 1449556_at            | expression microarray | mPFC                  | -1.30                 | 0.0060      | 200905_x_at | 1.24       | 0.0095  | 10 (2)                     |        |
|               | H2-Ea (HLA-DRA)                             | histocompatibility 2, class II antigen E alpha            | 1422892_s_at          | expression microarray | DG                    | 1.69                  | 0.0191      | 210982_s_at | 1.36       | 0.0578  | 4                          |        |
| H2-D1         | histocompatibility 2, D region locus 1      | 1427651_x_at                                              | expression microarray | DG                    | 1.47                  | 0.0434                |             |             |            | 4       |                            |        |
| Cytokines     | pro-inflammatory                            | Il1a                                                      | NM_010554             | quantitative PCR      | HIPP                  | 1.34                  | 0.0817      | 210118_s_at | 1.01       | 0.4413  |                            |        |
|               |                                             |                                                           | 1421473_at            | expression microarray | mPFC                  | 1.20                  | 0.0444      |             |            |         |                            |        |
|               |                                             | Il1b                                                      | interleukin 1 beta    | NM_008361             | quantitative PCR      | HIPP                  | -1.11       | 0.6230      | 39402_at   | 1.04    | 0.1604                     |        |
|               |                                             |                                                           |                       | 1449399_a_at          | expression microarray | mPFC                  | 1.21        | 0.0327      |            |         |                            |        |
|               |                                             | Il2                                                       | interleukin 2         | 1449990_at            | expression microarray | mPFC                  | -1.04       | 0.2027      | 217181_at  | -1.01   | 0.3951                     |        |
|               |                                             |                                                           |                       |                       | expression microarray | DG                    | 1.03        | 0.5787      |            |         |                            |        |
|               |                                             | Il3                                                       | interleukin 3         | 1450566_at            | expression microarray | mPFC                  | 1.03        | 0.7002      | 207906_at  | -1.04   | 0.2353                     |        |
|               |                                             |                                                           |                       |                       | expression microarray | DG                    | 1.08        | 0.1157      |            |         |                            |        |
|               |                                             | Il6                                                       | interleukin 6         | NM_031168             | quantitative PCR      | HIPP                  | 2.06        | 0.0746      | 243977_at  | -1.02   | 0.2821                     |        |
|               |                                             |                                                           |                       |                       | 1450297_at            | expression microarray | mPFC        | 1.15        |            |         |                            | 0.0470 |
|               |                                             | Il12a                                                     | interleukin 12a       | 1425454_a_at          | expression microarray | mPFC                  | -1.36       | 0.1521      | 207160_at  | -1.01   | 0.3319                     |        |
|               |                                             |                                                           |                       |                       | expression microarray | DG                    | 1.13        | 0.0847      |            |         |                            |        |
|               |                                             | Il15                                                      | interleukin 15        | 1418219_at            | expression microarray | mPFC                  | 1.04        | 0.3897      | 217372_at  | 1.02    | 0.2544                     |        |
|               |                                             |                                                           |                       |                       | expression microarray | DG                    | -1.06       | 0.4606      |            |         |                            |        |
|               |                                             | Il17a                                                     | interleukin 17 alpha  | 1421672_at            | expression microarray | mPFC                  | 1.06        | 0.3669      | 205707_at  | 1.18    | 0.0004                     |        |
|               |                                             |                                                           |                       |                       | expression microarray | DG                    | -1.09       | 0.1381      |            |         |                            |        |
|               |                                             | Il18                                                      | interleukin 18        | 1417932_at            | expression microarray | mPFC                  | 1.02        | 0.5895      | 206295_at  | 1.09    | 0.0631                     |        |
|               |                                             |                                                           |                       |                       | expression microarray | DG                    | -1.09       | 0.0654      |            |         |                            |        |
|               |                                             | Il31                                                      | interleukin 31        | 1430001_at            | expression microarray | mPFC                  | -1.05       | 0.1754      | 1553032_at | -1.00   | 0.4948                     |        |
|               |                                             |                                                           |                       |                       | expression microarray | DG                    | 1.06        | 0.1675      |            |         |                            |        |
| Tnf           | tumor necrosis factor                       | NM_013693                                                 | quantitative PCR      | HIPP                  | -1.12                 | 0.6312                | 207113_s_at | 1.04        | 0.1065     |         |                            |        |

|                   |                                   |                                    |                       |                       |              |             |             |             |        |        |   |
|-------------------|-----------------------------------|------------------------------------|-----------------------|-----------------------|--------------|-------------|-------------|-------------|--------|--------|---|
|                   | (tumor necrosis factor alpha)     | 1419607_at                         | expression microarray | mPFC                  | -1.00        | 0.9904      |             |             |        |        |   |
|                   |                                   |                                    | expression microarray | DG                    | 1.09         | 0.2969      |             |             |        |        |   |
| Ccl2              | chemokine (C-C motif) ligand 2    | NM_011333                          | quantitative PCR      | HIPP                  | 1.70         | 0.0878      | 216598_s_at | 1.16        | 0.2467 |        |   |
|                   |                                   | 1420380_at                         | expression microarray | mPFC                  | 1.04         | 0.3637      |             |             |        |        |   |
|                   |                                   |                                    | expression microarray | DG                    | 1.20         | 0.0657      |             |             |        |        |   |
| Ccl8              | chemokine (C-C motif) ligand 8    | 1419684_at                         | expression microarray | mPFC                  | <b>1.35</b>  | 2.9E-05     | 214038_at   | -1.09       | 0.0635 |        |   |
|                   |                                   |                                    | expression microarray | DG                    | <b>1.36</b>  | 0.0012      |             |             |        |        | 4 |
| Ccl17             | chemokine (C-C motif) ligand 17   | 1419413_at                         | expression microarray | mPFC                  | -1.02        | 0.8010      | 226960_at   | 1.03        | 0.1761 |        |   |
|                   |                                   |                                    | expression microarray | DG                    | <b>1.22</b>  | 0.0252      |             |             |        |        | 4 |
| Ccl27a            | chemokine (C-C motif) ligand 27A  | 1430375_a_at                       | expression microarray | mPFC                  | -1.32        | 0.0024      | 207955_at   | -1.00       | 0.4766 |        |   |
|                   |                                   |                                    | expression microarray | DG                    | <b>-1.44</b> | 2.1E-08     |             |             |        |        | 4 |
| Cxcl9             | chemokine (C-X-C motif) ligand 9  | 1456907_at                         | expression microarray | mPFC                  | -1.04        | 0.5194      | 1560791_at  | -1.01       | 0.4244 |        |   |
|                   |                                   |                                    | expression microarray | DG                    | 1.13         | 0.0142      |             |             |        |        |   |
| Cxcl10            | chemokine (C-X-C motif) ligand 10 | 1418930_at                         | expression microarray | mPFC                  | 1.01         | 0.8429      | 204533_at   | 1.17        | 0.1879 |        |   |
|                   |                                   |                                    | expression microarray | DG                    | 1.50         | 0.1164      |             |             |        |        |   |
| Cxcl16            | chemokine (C-X-C motif) ligand 16 | 1449195_s_at                       | expression microarray | mPFC                  | 1.06         | 0.3457      | 223454_at   | 1.13        | 0.0697 |        |   |
|                   |                                   |                                    | expression microarray | DG                    | <b>1.26</b>  | 0.0435      |             |             |        |        | 4 |
| Ifnb1             | interferon beta 1, fibroblast     | NM_010510                          | quantitative PCR      | HIPP                  | -1.08        | 0.6360      | 208173_at   | 1.00        | 0.4712 |        |   |
|                   |                                   | 1422305_at                         | expression microarray | mPFC                  | 1.05         | 0.6214      |             |             |        |        |   |
|                   |                                   |                                    | expression microarray | DG                    | 1.19         | 0.1535      |             |             |        |        |   |
| Ifng              | interferon gamma                  | 1425947_at                         | expression microarray | mPFC                  | -1.13        | 0.0122      | 210354_at   | -1.01       | 0.3638 |        |   |
|                   |                                   |                                    | expression microarray | DG                    | -1.00        | 0.9683      |             |             |        |        |   |
| anti-inflammatory | IL4                               | interleukin 4                      | 1449864_at            | expression microarray | mPFC         | -1.10       | 0.2368      | 207539_s_at | 1.05   | 0.0633 |   |
|                   |                                   |                                    | expression microarray | DG                    | 1.00         | 0.9691      |             |             |        |        |   |
|                   | IL5                               | interleukin 5                      | 1450550_at            | expression microarray | mPFC         | 1.01        | 0.7264      | 207952_at   | 1.02   | 0.3105 |   |
|                   |                                   |                                    | expression microarray | DG                    | -1.12        | 0.0173      |             |             |        |        |   |
|                   | IL10                              | interleukin 10                     | 1420802_at            | quantitative PCR      | HIPP         | -1.23       | 0.7710      | 207433_at   | 1.02   | 0.2500 |   |
|                   |                                   |                                    | expression microarray | mPFC                  | -1.02        | 0.6765      |             |             |        |        |   |
|                   |                                   |                                    | expression microarray | DG                    | -1.03        | 0.7388      |             |             |        |        |   |
|                   | IL13                              | interleukin 13                     | 1420802_at            | expression microarray | mPFC         | -1.01       | 0.9250      | 207844_at   | 1.02   | 0.3450 |   |
|                   |                                   |                                    | expression microarray | DG                    | -1.06        | 0.1339      |             |             |        |        |   |
|                   | IL16                              | interleukin 16                     | 1448686_at            | expression microarray | mPFC         | -1.16       | 0.0667      | 1555016_at  | 1.04   | 0.1071 |   |
|                   |                                   |                                    | expression microarray | DG                    | <b>-2.38</b> | 0.0008      |             |             |        |        | 4 |
|                   | Tgfb1                             | transforming growth factor, beta 1 | 1420653_at            | expression microarray | mPFC         | <b>1.32</b> | 0.0212      | 203084_at   | 1.04   | 0.2116 |   |
|                   |                                   |                                    | expression microarray | DG                    | 1.03         | 0.6899      |             |             |        |        |   |

Abbreviations: HIPP, hippocampus; DG, dentate gyrus; PFC, medial prefrontal cortex; BA10, Brodmann area 10; SCZ, schizophrenia

**Upregulated genes** (fold change > 1.20, and P < 0.05)

**Downregulated gene** (fold change < -1.20, and P < 0.05)

No probe/no human homologue

(1) Genes differentially expressed in the BA10 of SCZ postmortem brain.

Maycox PR, Kelly F, Taylor A, Bates S, Reid J, Logendra R, et al. Analysis of gene expression in two large schizophrenia cohorts identifies multiple changes associated with nerve terminal function. *Mol. Psychiatry*. 2009; 14: 1083-1094.

(2) up-regulated in superior temporal cortex and anterior prefrontal cortex of SCZ postmortem brain.

Barnes MR, Huxley-Jones J, Maycox PR, Lennon M, Thornber A, Kelly F, et al. Transcription and pathway analysis of the superior temporal cortex and anterior prefrontal cortex in schizophrenia. *Journal of Neuroscience Research*. 2011; 89: 1218-1227.
