# Supplementary material for: Deficiency of Schnurri-2, an MHC Enhancer Binding Protein, Induces Mild Chronic Inflammation in the Brain and Confers Molecular, Neuronal, and Behavioral Phenotypes Related to Schizophrenia
Source: PubMed Central journal article supplement — Neuropsychopharmacology. 2013 Mar 6;38(8):1409–25. doi: 10.1038/npp.2013.38 (PMC3682135; doi:10.1038/npp.2013.38), 2013-03-06
Supplement: npp201338x10.pdf [file npp201338x10.pdf]

Supplementary Table 10. SNPs in, or in close proximity to, NF- $\kappa$ B binding sites within the MHC region that play a role in susceptibility to Schizophrenia, and expression of their neighboring genes.

| SNP         | Position | LD block <sup>*1</sup> | Disease association (reference) | P value  | Distance (bp) <sup>*2</sup> | Matching Score <sup>*3</sup> | Putative NF- $\kappa$ B binding sequence <sup>*4</sup> | Neighbouring genes <sup>*5</sup>                                                           | Expressions in post-mortem brains of SCZ and/or BD patients <sup>*6</sup>         | Expressions in PFC of Shn-2 KO mice <sup>*7</sup> |
|-------------|----------|------------------------|---------------------------------|----------|-----------------------------|------------------------------|--------------------------------------------------------|--------------------------------------------------------------------------------------------|-----------------------------------------------------------------------------------|---------------------------------------------------|
| rs3734534   | 26240649 | Block 1                | SCZ(4)                          | 3.33E-02 | 41                          | 0.819                        | AAGGGAGCGCCAA                                          | HIST1H3E, HIST1H2APS3, HIST1H1D, HIST1H4F, HIST1H4G, HIST1H3F                              | HIST1H1D: $\uparrow$ (7)<br>HIST1H3F: $\downarrow$ (7)                            |                                                   |
| rs2072803   | 26392515 |                        | SCZ(3)                          | 8.19E-07 | 5                           | 0.944                        | GGGGTTCCC                                              | BTN2A2, BTN3A2, BTN3A1                                                                     |                                                                                   |                                                   |
| rs13219354  | 27185664 |                        | SCZ(3)                          | 1.12E-07 | -7                          | 0.907                        | GGTAATGCC                                              | RPL10P2, TRNAV28, TRNAS7, TRNAR17, TRNAL10, TRNAV12, TRNAI17                               |                                                                                   |                                                   |
| rs6917419   | 27243480 | Block 3                | SCZ(4)                          | 1.42E-02 | 18                          | 0.908                        | GGATATCCC                                              | PRSS16, LOC442172, TRNAI28P, TRNAS32P, TRNAI1, TRNAI11, TRNAV27, TRNAV31, TRANAQ27, TRNAS5 |                                                                                   |                                                   |
| rs3800316   | 27256102 |                        | SCZ(1)                          | 3.80E-08 | 17                          | 0.911                        | AGGATATCCCG                                            |                                                                                            |                                                                                   |                                                   |
| rs7746199   | 27261324 | Block 4                | SCZ(3)                          | 3.81E-08 | 37                          | 0.826                        | GGAGTTTCC                                              | LOC442172, TRNAI28P, TRNAS32P, TRNAI1, TRNAI11, TRNAV27, TRNAV31, TRANAQ27, TRNAS5         |                                                                                   |                                                   |
| rs3800318   | 27263641 |                        | SCZ(1)                          | 5.00E-08 | -32                         | 0.911                        | TGGGAATATCCT                                           | TRNAS5P, TRNAI1, TRNAI11, TRNAV27, TRNAI28P, TRNAV31, TRNAS32P, TRANAQ27, TRNAS5, POM121L2 |                                                                                   |                                                   |
| rs12182446  | 27745738 |                        | SCZ(3)                          | 4.77E-07 | 15                          | 0.885                        | AGGACTTACC                                             | TRNAI1, TRNAI11, TRNAV27, TRNAI28P, TRNAV31, TRNAS32P, TRANAQ27, TRNAS5, POM121L2          |                                                                                   |                                                   |
| rs17693963  | 27710165 | Block 5                | SCZ(3)                          | 2.81E-07 | 41                          | 0.894                        | AGGAATTACC                                             | TRNAV7, LOC100131289, TRNAM2, RSL24D1P1, TRANAQ27, TRNAQ10, HISTH4PS1, HIST1HNB, HIST1H2AI |                                                                                   |                                                   |
| rs200991    | 27815494 |                        | SCZ(4)                          | 1.37E-02 | 39                          | 0.842                        | GGGTTTTTC                                              | TRNAT18, TRNAV15, GPR89P, TRNAV7, LOC100131289                                             |                                                                                   |                                                   |
| rs184215243 | 27925555 | Block 6                | SCZ(4)                          | 1.72E-02 | -9                          | 0.820                        | GGAACTGCT                                              | LOC100996513, HIST1H2AK, HIST1H4K, HIST1H2BN, HIST1H1B, HIST1H2BPS2, HIST1H2AL             | HIST1H2BN: $\uparrow$ (7)<br>HIST1H4K: $\uparrow$ (8)<br>HIST1H1B: $\uparrow$ (8) |                                                   |
| rs1150683   | 28155314 |                        | SCZ(4)                          | 2.85E-02 | 11                          | 0.877                        | GNGAAGTCCC                                             | OR2W6P, OR2B6, RPLP2P1, OR2W4P                                                             |                                                                                   |                                                   |
| rs2299030   | 28198755 |                        | SCZ(4)                          | 2.85E-02 | 3                           | 0.831                        | TGGTTCTCC                                              | ZNF192P2, ZNF603P                                                                          |                                                                                   |                                                   |
| rs114108814 | 28251663 | Block 6                | SCZ(4)                          | 2.85E-02 | 3                           | 0.805                        | GTGCATTCCC                                             | ZNF193, TRNAS13, TOB2P1, ZKSCAN4                                                           |                                                                                   |                                                   |
| rs13211507  | 28257377 |                        | SCZ(2)                          | 8.30E-11 | 0                           | 0.867                        | AGGAAGATCCCN                                           | ZNF187, PGBD1                                                                              |                                                                                   |                                                   |
| rs6918631   | 28312456 |                        | SCZ(4)                          | 1.06E-04 | -10                         | 0.853                        | GTGAAGCCC                                              | PGDB1, ZNF187                                                                              |                                                                                   |                                                   |
| rs13213152  | 28349698 | Block 6                | SCZ(4)                          | 1.06E-04 | 18                          | 0.920                        | GGGAATTCCA                                             | ZNF323, ZKSCAN3                                                                            |                                                                                   |                                                   |
| rs6927023   | 28454221 |                        | SCZ(5)                          | 8.43E-06 | 0                           | 0.805                        | [A/G]GGAGGTCCC                                         | ZSCAN12, ZKSCAN3                                                                           |                                                                                   |                                                   |
| rs2269554   | 28994989 |                        | SCZ(4)                          | 2.93E-05 | -19                         | 0.876                        | GGAAGAACCC                                             | TRNAL12, TRNAL47P, TRMEP1, TRNAT5, GPX6                                                    |                                                                                   |                                                   |
| rs2394514   | 29023214 | Block 6                | SCZ(4)                          | 2.96E-02 | 42                          | 0.847                        | TGGTCTTGCC                                             | ZNF211, DR2AD1P, LOC100129636                                                              |                                                                                   |                                                   |
| rs11961013  | 29471934 |                        | SCZ(4)                          | 1.16E-05 | -14                         | 0.838                        | CAGAATTTCC                                             | LOC100129636                                                                               |                                                                                   |                                                   |
| rs112248026 | 29542215 |                        | SCZ(4)                          | 3.11E-02 | -29                         | 0.825                        | CCTGAATATCCCCC                                         | MAS1L, RPS17P1                                                                             |                                                                                   |                                                   |
| rs3129090   | 29664131 | Block 6                | SCZ(4)                          | 3.11E-02 | 0                           | 0.734                        | GTGAGTNC                                               | UBD, OR2H5P, TMEM183AP1, RPL13AP, OR2H2                                                    |                                                                                   |                                                   |
| rs3871467   | 29677249 |                        | SCZ(4)                          | 3.24E-02 | 34                          | 0.894                        | GGGAACCCCA                                             | ZFP57, ZDHC20P1                                                                            |                                                                                   |                                                   |
| rs1611388   | 29680789 |                        | SCZ(4)                          | 7.27E-03 | -8                          | 0.857                        | GGCCACTCCC                                             | ZDHC20P1, HLA-F, HCG4P11, RPL23AP1, HLA-F-AS1                                              |                                                                                   |                                                   |
| rs2072898   | 29692729 | Block 6                | SCZ(4)                          | 7.27E-03 | -8                          | 0.857                        | GGCCACTCCC                                             | ZDHC20P1, HLA-F, HCG4P11, RPL23AP1, HLA-F-AS1                                              |                                                                                   |                                                   |
| rs1736913   | 29704400 |                        | SCZ(4)                          | 4.24E-02 | 28                          | 0.841                        | AGGGGACTTGCTTC                                         | ZDHC20P1, HLA-F, HCG4P11, RPL23AP1, HLA-F-AS1                                              |                                                                                   |                                                   |
| rs9258215   | 29707307 |                        | SCZ(4)                          | 5.14E-04 | -26                         | 0.960                        | GGAAACCCCA                                             | HCG4P11, HLA-F, RPL23AP1, HLA-F-AS1, MICE                                                  |                                                                                   |                                                   |
| rs1737055   | 29733742 | Block 6                | SCZ(4)                          | 4.60E-05 | 1                           | 0.930                        | TGGTGTTTCC                                             | HCG4P11, HLA-F, RPL23AP1, HLA-F-AS1, MICE, HCG9P5, IFITM4P                                 |                                                                                   |                                                   |
| rs1737030   | 29737563 |                        | SCZ(4)                          | 1.50E-02 | 22                          | 0.828                        | GAGAGATCCC                                             | HCG4P11, HLA-F, RPL23AP1, HLA-F-AS1, MICE, HCG9P5, IFITM4P                                 |                                                                                   |                                                   |
| rs2734990   | 29812505 |                        | SCZ(4)                          | 1.50E-02 | 22                          | 0.828                        | GAGAGATCCC                                             | HCG4P11, HLA-F, RPL23AP1, HLA-F-AS1, MICE, HCG9P5, IFITM4P                                 |                                                                                   |                                                   |
| rs1611627   | 29926741 | Block 6                | SCZ(4)                          | 3.50E-02 | 10                          | 0.991                        | GGAACTCCC                                              | 3.8-1.5, HLA-F-AS1, IFITM4P, MICE, HCG9P5                                                  |                                                                                   |                                                   |
| rs1737030   | 29737563 |                        | SCZ(4)                          | 3.50E-02 | 26                          | 0.847                        | AGGGGAACCTCAGA                                         | 3.8-1.5, HLA-F-AS1, IFITM4P, MICE, HCG9P5                                                  |                                                                                   |                                                   |
| rs2734990   | 29812505 |                        | SCZ(4)                          | 3.70E-02 | -11                         | 0.858                        | GGGAATTGTC                                             | 3.8-1.5, HLA-F-AS1, IFITM4P, MICE, HCG9P5                                                  |                                                                                   |                                                   |
| rs1611627   | 29926741 | Block 6                | SCZ(4)                          | 2.14E-02 | 4                           | 0.820                        | ATGAGTTTCC                                             | HCG4P8, HLA-G, HCGVIII-2, MICE                                                             | HLA-G: $\uparrow$ (9)                                                             |                                                   |
| rs1611627   | 29926741 |                        | SCZ(4)                          | 2.22E-02 | -10                         | 0.863                        | TGGCTTTCCC                                             | 3.8-1.5                                                                                    |                                                                                   |                                                   |

|             |          |            |          |     |                      |                                                                    |                                 |         |
|-------------|----------|------------|----------|-----|----------------------|--------------------------------------------------------------------|---------------------------------|---------|
| rs1011037   | 29650741 | SCZ(4)     | 4.44E-02 | 19  | 0.814 CAAGTATTTCCCCT | 3.0E-14                                                            |                                 |         |
| rs9259843   | 29896001 |            |          | 0   | 0.810 ATGGAANCTTCCAG | MCCD1P1, 3.8-1.3, HCG4B, HLA-K, HLA-U, HCG4P5, HLA-A               |                                 |         |
| rs2524005   | 29899677 | SCZ(5)     | 3.81E-07 | 10  | 0.824 GTCAAGCCCC     | HCG4B, HLA-K, HLA-U, HCG4P5, HLA-A                                 | HLA-A: ↑ (10)                   |         |
| rs6925061   | 29992286 | SCZ, BD(5) | 4.95E-07 | 12  | 0.838 GGAAATTC       | HLA-J, HCG8, ZNRD1-AS1, ETF1P1, HCG4P3                             | HLA-J: ↑ (8)                    |         |
| rs11965452  | 30011802 | SCZ(4)     | 1.17E-02 | 28  | 0.835 GGAATCACCT     | ZNRD1-AS1, ETF1P1, ZNRD1                                           |                                 |         |
| rs145478650 | 30128479 | SCZ(4)     | 3.98E-02 | 0   | 0.801 GGGGACTNCTCC   | TRIM40, TRIM10, TRIM15                                             | TRIM15: ↑ (7, 9)                |         |
| rs12663184  | 30301600 | SCZ(4)     | 2.80E-02 | -42 | 0.972 CAGGAACTTCCCCA | HCG18, HCG17, TRIM39, TRIM39-RPP21, HLA-N                          | HCG18: ↑ (7)                    |         |
| rs4713325   | 30383442 | SCZ(4)     | 2.14E-02 | -40 | 0.921 AGGCGTTTCC     | MICC                                                               |                                 |         |
| rs4713328   | 30383876 | SCZ(4)     | 7.51E-03 | -13 | 0.829 CTGACTTTCC     | MICC                                                               |                                 |         |
| rs4713328   | 30383876 | SCZ(4)     | 7.51E-03 | -15 | 0.814 GGGGCTTGGC     | MICC                                                               |                                 |         |
| rs2157605   | 30454076 | SCZ(4)     | 4.12E-03 | 14  | 0.808 GGGTGTTC       | TMPOP1, SUCLA2P1, RANP1, HLA-E                                     | HLA-E: ↓                        |         |
| rs188502980 | 30530949 |            |          | 0   | 0.721 TGTGACTTCCNA   | GNL1, PRR3, ABCF1                                                  | GNL1: ↓ (7, 12)                 |         |
| rs148600920 | 30670918 |            |          | 0   | 0.916 TGGGGATTCCCN   | PPP1R18, NRM, RPL7P4, MDC1, TUBB                                   |                                 |         |
| rs150040417 | 30680130 |            |          | 0   | 0.729 GCNGGACTTCCTTC | RPL7P4, MDC1, TUBB                                                 | TUBB: ↓ (7), ↑ (9)              |         |
| rs142435078 | 30864590 |            |          | 0   | 0.748 AGTGGATTTCCNTC | DDR1, GTF2H4, VARS2                                                | DDR1: ↑ (7, 9)<br>GTF2H4: ↑ (7) |         |
| rs2530709   | 30940569 | SCZ(4)     | 3.80E-02 | -25 | 0.830 AGTGGATGTACCCA | DPCR1, LOC100422429, LOC100420530, MUC21,                          |                                 |         |
| rs12528087  | 30980603 | SCZ(4)     | 4.98E-02 | -5  | 0.847 GGGGCTTTGC     | MUC22                                                              |                                 |         |
| rs9263715   | 31095801 | SCZ(4)     | 5.48E-04 | -40 | 0.852 GGCAGGGCCC     | C6orf15, CDSN, PSORS1C1, PSORS1C2, POLR2LP, CCHCR1                 |                                 |         |
| rs3134762   | 31210866 | SCZ(4)     | 1.24E-02 | 30  | 0.881 AGGATATTCC     |                                                                    |                                 |         |
| rs1050437   | 31239585 |            |          |     |                      |                                                                    |                                 |         |
| rs72558135  | 31239586 |            |          |     |                      |                                                                    |                                 |         |
| rs1050438   | 31239592 |            |          |     |                      |                                                                    |                                 |         |
| rs41542719  |          |            |          | 0   | 0.870 GGAGAGCCCCN    | HLA-C, USP8P1, RPL3P2, WASF5P                                      |                                 |         |
| rs3177890   | 31239593 |            |          |     |                      |                                                                    |                                 |         |
| rs41542719  |          |            |          |     |                      |                                                                    |                                 |         |
| rs45574634  | 31239594 |            |          |     |                      |                                                                    |                                 |         |
| rs16899205  | 31266361 | SCZ(4)     | 4.47E-02 | -42 | 0.815 ATGGGAGTTCTCA  | USP8P1, RPL3P2, WASF5P                                             |                                 |         |
| rs2524089   | 31266522 | SCZ(4)     | 1.46E-02 | 28  | 0.840 GGGACAGACC     | USP8P1, RPL3P2, WASF5P                                             |                                 |         |
| rs2844569   | 31336604 | SCZ(4)     | 3.85E-02 | 36  | 0.825 AAGGACAATCCACA | HLA-B, DHFRP2, FGFR3P1, ZDHHC20P2, HLA-S                           | HLA-B: ↓ (9)                    |         |
| rs2524094   | 31240041 | Block 7    |          | 0   | 0.819 NGGATTCTCC     | HLA-C, USP8P1, RPL3P2, WASF5P                                      |                                 |         |
| rs2442749   | 31352040 | SCZ(4)     | 6.65E-04 | 43  | 0.923 GGGGACTTCC     | DHFRP2, FGFR3P1, ZDHHC20P2, HLA-S, MICA                            |                                 |         |
| rs78961316  | 31325125 |            |          | 0   | 0.900 TGGNGAATCCCC   | HLA-B, DHFRP2                                                      | HLA-B: ↓ (9)                    |         |
| rs75369119  |          |            |          |     |                      |                                                                    |                                 |         |
| rs191718782 | 31528188 |            |          | 0   | 0.884 NGGGGTTCCC     | ATP6V1G2-DDX39B, DDX39B, ATP6V1G2, NFKBIL1, LOC100287329, LTA, TNF | ATP6V1G2: ↓ (7)                 |         |
| rs147118182 | 31550289 |            |          | 0   | 0.706 GGAATTTCCN     | LOC100287329, LTA, TNF, LTB, LST1, LST1                            | LST1: ↓ (11)                    |         |
| rs2857597   | 31585000 | SCZ(4)     | 2.57E-02 | 42  | 0.914 GGAATCCCCC     | UQCRHP1, AIF1, SNORA38, PRRC2A                                     | AIF1: ↓ (11), ↑ (12)            | AIF1: ↑ |
| rs151200532 | 31601179 |            |          | 0   | 0.885 CNGGGGCTTCCCCT | AIF1, SNORA38, PRRC2A, BAG6, APOM                                  | AIF1: ↓ (11), ↑ (12)            | AIF1: ↑ |
| rs113819636 | 31601185 |            |          | 0   | 0.900 GGGGANGCCC     | AIF1, SNORA38, PRRC2A, BAG6, APOM                                  | AIF1: ↓ (11), ↑ (12)            | AIF1: ↑ |
| rs2272593   | 31601344 |            |          | 0   | 0.810 GGGAGCAGCC     | AIF1, SNORA38, PRRC2A, BAG6, APOM                                  | AIF1: ↓ (11), ↑ (12)            | AIF1: ↑ |
| rs1046089   | 31602967 | SCZ(4)     | 1.19E-02 | -38 | 0.821 GGAATCACA      | PRRC2A, BAG6, APOM, C6orf47, GPANK1, CSNK2B, LY6G5B                |                                 |         |
| rs805301    | 31618121 | SCZ(4)     | 4.55E-03 | 45  | 0.821 GGAATCACA      | PRRC2A, BAG6, APOM, C6orf47, GPANK1, CSNK2B, LY6G5B                |                                 |         |
| rs147925659 | 31615449 |            |          | 0   | 0.772 GGGGCANGCTCCTC | PRRC2A, BAG6, APOM, C6orf47, GPANK1, CSNK2B                        |                                 |         |
| rs142009508 | 31627341 |            |          | 0   | 0.803 GGACACCCCN     | BAG6, APOM, C6orf47, GPANK1, CSNK2B, LY6G5B, LY6G5C                |                                 |         |

|             |          |            |          |     |       |                |                                                                    |                                            |                  |
|-------------|----------|------------|----------|-----|-------|----------------|--------------------------------------------------------------------|--------------------------------------------|------------------|
| rs11549123  | 31702008 |            |          | 0   | 0.778 | TTGGGAACTGNCCA | LY6G6D, LY6G6C, C6orf25, CLIC1, MSH5-SAPCD1, MSH5                  | CLIC1: ↑ (12)                              |                  |
| rs707928    | 31742590 | SCZ(4)     | 2.34E-03 | -10 | 0.811 | TGTGTTTTCC     | MSH5, MSH5-SAPCD1, SAPCD1, VMA7, VARS                              | VMA7: ↓ (9)                                |                  |
| rs140366323 | 31749648 |            |          | 0   | 0.819 | AGNGGACACTCCGA | MSC5, MSH5-SAPCD1, SAPCD1, VMA7, VARS, LSM2                        | VMA7: ↓ (9)                                |                  |
| rs145442830 | 31749658 |            |          | 0   | 0.891 | GGGGACNGTCCAG  | C4A <sup>*</sup> , C4B, CYP21A2, TNXB                              | C4A: ↑ (12)                                | C4A: ↑<br>C4B: ↑ |
| rs41258944  | 32017242 |            |          | 0   | 0.855 | CNGGGACCATCCAG | C4A <sup>*</sup> , C4B, CYP21A2, TNXB                              | C4A: ↑ (12)                                | C4A: ↑<br>C4B: ↑ |
| rs61745920  | 32017243 |            |          | 0   | 0.758 | CGGNGACTGTCCAG | TNXB                                                               |                                            |                  |
| rs61746537  | 32021355 |            |          | 0   | 0.806 | NGGAACTGTCCA   | TNXB                                                               |                                            |                  |
| rs61740712  | 32021358 |            |          | 0   | 0.806 | GGGNCTCGCC     | TNXB                                                               |                                            |                  |
| rs141752970 | 32032790 |            |          | 0   | 0.797 | AGAAAGNCCC     | PRRT1, LOC100507547, PPT2, PPT2-EGFL8, EGFL8, AGPAT1               | PRRT1: ↑ (7)                               |                  |
| rs142409885 | 32036357 |            |          | 0   | 0.868 | TTGGAACITTCNA  | PPT2-EGFL8, EGFL8, AGPAT1, RNF5, AGER, PBX2, GPSM3, NOTCH4         | AGER: ↑ (9)<br>PBX2: ↑ (8)<br>GPSM3: ↑ (8) |                  |
| rs3749962   | 32036363 |            |          | 0   | 0.894 | GTGAATTCCC     | AGER, PBX2, GPSM3, NOTCH4                                          | AGER: ↑ (9)<br>PBX2: ↑ (8)<br>GPSM3: ↑ (8) |                  |
| rs61744966  | 32036363 |            |          | 0   | 0.709 | AGGTNCCCC      | GPSM3, NOTCH4                                                      |                                            |                  |
| rs112581362 | 32057142 |            |          | 0   | 0.834 | NGTGGACCCTCTG  | NOTCH4                                                             |                                            |                  |
| rs117182156 | 32057148 |            |          | 0   | 0.864 | TNGGAAGGTCCATT | HCG23, BTNL2                                                       |                                            |                  |
| rs186990718 | 32121861 |            |          | 0   | 0.894 | GGNACTCCCC     | HLA-DRB5                                                           | HLA-DRB5: ↑ (7, 12)                        |                  |
| rs1661134   | 32155121 |            |          | 0   | 0.847 | CTGGAAGTCCCT   | C6orf10, HCG23, BTNL2                                              |                                            | C6orf10: ↑       |
| rs146965329 | 32155125 | SCZ(2)     | 2.30E-10 | 37  | 0.977 | AGGAATTTCC     | HLA-DQA1                                                           | HLA-DQA1: ↑ (13)                           | HLA-DQA1: ↑      |
| rs3131296   | 32172993 |            |          | 0   | 0.901 | GGGATTNCCC     | HLA-DQA1                                                           | HLA-DQA1: ↑ (13)                           | HLA-DQA1: ↑      |
| rs143622513 | 32181942 |            |          | 0   | 0.894 | GGGATTCCN      | HLA-DQB1                                                           | HLA-DQB1: ↑ (7, 12, 13)                    |                  |
| rs146606566 | 32181945 |            |          | 0   | 0.885 | GGCAACTCCT     | HLA-DQA2                                                           |                                            |                  |
| rs138205668 | 32188865 |            |          | 0   | 0.843 | TGGAAANTACCT   | HLA-DOB, TAP2, PSMB8, LOC100507463, TAP1                           | TAP2: ↑ (9)<br>TAP1: ↑ (12)                |                  |
| rs141236527 | 32188869 |            |          | 0   | 0.798 | NGTGACTCCCCA   | HLA-DMA, BRD2                                                      | HLA-DMA: ↑ (12)                            |                  |
| rs146677249 | 32364137 |            |          | 0   | 0.901 | NGGAGTTCCC     | BRD2                                                               |                                            |                  |
| rs115417906 | 32489822 |            |          | 0   | 0.754 | GGNGACTTTGCC   | COL11A2, RXRB, RNY4P10, SLC39A7, MIR219-1, HSD17B8, RING1, ZNF70P1 | RXRB: ↓ (7), ↑ (9)                         |                  |
| rs148834340 | 32489825 |            |          | 0   | 0.732 | GGCNCCTTCC     | COL11A2, RXRB, RNY4P10, SLC39A7, MIR219-1, HSD17B8, RING1, ZNF70P1 | RXRB: ↓ (7), ↑ (9)                         |                  |
| rs3117099   | 32358270 | SCZ(5)     | 4.12E-06 | 6   |       |                |                                                                    |                                            |                  |
|             |          | SCZ, BD(5) | 2.70E-06 |     |       |                |                                                                    |                                            |                  |
| rs9272219   | 32602269 | SCZ(1)     | 6.90E-08 | -2  |       |                |                                                                    |                                            |                  |
|             |          | SCZ(3)     | 6.88E-08 |     |       |                |                                                                    |                                            |                  |
| rs115222936 | 32605039 |            |          | 0   |       |                |                                                                    |                                            |                  |
| rs9274652   | 32636235 | Block 8    |          | 0   |       |                |                                                                    |                                            |                  |
| rs9276227   | 32700684 | SCZ(4)     | 1.06E-02 | -15 |       |                |                                                                    |                                            |                  |
| rs17220178  | 32794947 |            |          | 0   |       |                |                                                                    |                                            |                  |
| rs147219068 | 32940687 |            |          | 0   |       |                |                                                                    |                                            |                  |
| rs140566548 | 32940694 |            |          | 0   |       |                |                                                                    |                                            |                  |
| rs142520217 | 32940695 |            |          | 0   |       |                |                                                                    |                                            |                  |
| rs34652619  | 32942636 |            |          | 0   |       |                |                                                                    |                                            |                  |
| rs1048780   | 33170841 |            |          | 0   |       |                |                                                                    |                                            |                  |
| rs150581613 | 33173227 |            |          | 0   |       |                |                                                                    |                                            |                  |

Abbreviations: SNP, single-nucleotide polymorphism; LD, linkage disequilibrium; SCZ, schizophrenia; BD, bipolar disorder

- \*1: LD blocks reported in a previous study (3) (Blocks 6–8; estimated based on Figure S10 in (3))
- \*2: distance (bp) between the predicted NF- $\kappa$ B binding region and the most proximal (0–40bp) SNP site (plus, 5'→3'; minus, 3'→5'; 0, SNP on NF- $\kappa$ B binding region)
- \*3: matching score between a matrix of NF- $\kappa$ B binding sites and an arbitrary section of the input sequence (calculated using Match (<http://www.gene-regulation.com/cgi-bin/pub/programs/match/bin/match.cgi>) using a library of mononucleotide weight matrices fromTRANSFAC)
- \*4: NF- $\kappa$ B binding site sequence predicted by TRANSFAC (N: position of the SNPs)
- \*5: genes in the flanking regions (approximately 20-kb) of the SNPs (identified using the 1000 Genomes Browser (<http://www.ncbi.nlm.nih.gov/variation/tools/1000genomes/>))
- \*6: genes up- (↑) or down-regulated (↓) in the post-mortem brains of SCZ and/or BD patients (identified by curated studies in NextBio (<http://www.nextbio.com>))
- \*7: genes up- or down-regulated in the PFC of Shn-2 KO mice (identified using NextBio)
- \*8: 26.8kbp apart from rs61745920

## References

- (1) Purcell SM, Wray NR, Stone JL, Visscher PM, O'Donovan MC, Sullivan PF, et al. Common polygenic variation contributes to risk of schizophrenia and bipolar disorder. *Nature*. 2009; 460: 748–752.
- (2) Stefansson H, Ophoff RA, Steinberg S, Andreassen OA, Cichon S, Rujescu D, et al. Common variants conferring risk of schizophrenia. *Nature*. 2009; 460: 744–747.
- (3) Shi J, Levinson DF, Duan J, Sanders AR, Zheng Y, Pe'er I, et al. Common variants on chromosome 6p22.1 are associated with schizophrenia. *Nature*. 2009; 460: 753–757.
- (4) Shi Y, Li Z, Xu Q, Wang T, Li T, Shen J, et al. Common variants on 8p12 and 1q24.2 confer risk of schizophrenia. *Nature Genetics*. 2011; 43: 1224–1227.
- (5) Bergen SE, O'Dushlaine CT, Ripke S, Lee PH, Ruderfer DM, Akterin S, et al. Genome-wide association study in a Swedish population yields support for greater CNV and MHC involvement in schizophrenia compared with bipolar disorder. *Molecular Psychiatry*. 2012; 17: 880–886.
- (6) Matys V, Fricke E, Geffers R, Göbbling E, Haubrock M, Hehl R, et al. TRANSFAC®: transcriptional regulation, from patterns to profiles. *Nucl. Acids Res*. 2003; 31: 374–378.
- (7) Narayan S, Tang B, Head SR, Gilmartin TJ, Sutcliffe JG, Dean B, et al. Molecular profiles of schizophrenia in the CNS at different stages of illness. *Brain Res*. 2008; 1239: 235–248.
- (8) Ryan MM, Lockstone HE, Huffaker SJ, Wayland MT, Webster MJ, Bahn S. Gene expression analysis of bipolar disorder reveals downregulation of the ubiquitin cycle and alterations in synaptic genes. *Molecular Psychiatry*. 2006; 11: 965–978.
- (9) Harris LW, Wayland M, Lan M, Ryan M, Giger T, Lockstone H, et al. The cerebral microvasculature in schizophrenia: a laser capture microdissection study. *PLoS ONE*. 2008; 3: e3964.
- (10) Saetre P, Emilsson L, Axelsson E, Kreuger J, Lindholm E, Jazin E. Inflammation-related genes up-regulated in schizophrenia brains. *BMC Psychiatry*. 2007; 7: 46.
- (11) Perrone-Bizzozero N. *perro-affy-human-186940* [Internet]. 2006. Available from: <http://www.ncbi.nlm.nih.gov/projects/geo/query/acc.cgi?acc=GSE4036>
- (12) Maycox PR, Kelly F, Taylor A, Bates S, Reid J, Logendra R, et al. Analysis of gene expression in two large schizophrenia cohorts identifies multiple changes associated with nerve terminal function. *Mol. Psychiatry*. 2009; 14: 1083–1094.
- (13) Barnes MR, Huxley-Jones J, Maycox PR, Lennon M, Thornber A, Kelly F, et al. Transcription and pathway analysis of the superior temporal cortex and anterior prefrontal cortex in schizophrenia. *Journal of Neuroscience Research*. 2011; 89: 1218–1227.
