# Supplementary material for: Deficiency of Schnurri-2, an MHC Enhancer Binding Protein, Induces Mild Chronic Inflammation in the Brain and Confers Molecular, Neuronal, and Behavioral Phenotypes Related to Schizophrenia
Source: PubMed Central journal article supplement — Neuropsychopharmacology. 2013 Mar 6;38(8):1409–25. doi: 10.1038/npp.2013.38 (PMC3682135; doi:10.1038/npp.2013.38), 2013-03-06
Supplement: npp201338x11.pdf [file npp201338x11.pdf]

Supplementary Table 11. Phenotypes of Shn-2 KO mice and abnormalities associated with schizophrenia.

|                             | Schizophrenia (1, 2, 3)                                                                                                         | Shn-2 KO mice                                                                                                                                         |
|-----------------------------|---------------------------------------------------------------------------------------------------------------------------------|-------------------------------------------------------------------------------------------------------------------------------------------------------|
| Positive Signs/Symptoms:    | Psychomotor agitation                                                                                                           | Increased locomotor activity                                                                                                                          |
| Negative Signs/Symptoms:    | Social withdrawal                                                                                                               | Decreased interaction with a juvenile conspecific,<br>decreased preference for social novelty                                                         |
|                             | Self neglect                                                                                                                    | Decreased nest building behavior                                                                                                                      |
| Cognitive Signs/Symptoms:   | Decreased working memory                                                                                                        | Impaired performance in 8-arm radial maze working memory task,<br>impaired working memory in T-maze task                                              |
|                             | Deficits in attention/sensorimotor gating                                                                                       | Decreased sensorimotor gating (PPI deficits)                                                                                                          |
|                             | Inflexibility                                                                                                                   | Normal performance in reversal learning in T-maze left-right discrimination                                                                           |
| Other behavioral signs      | Decreased pain sensitivity                                                                                                      | Decreased pain sensitivity (5)                                                                                                                        |
|                             | Lack of activity, depressive mood                                                                                               | Increased depression-like behavior in sucrose preference test,<br>Decreased depression-like behavior in forced swim test and tail suspension test (7) |
|                             | High prevalence of anxiety disorder/symptomatology (16)                                                                         | Increased anxiety-related behaviors (4),<br>Increased stay time on open arms in the elevated plus maze (14)                                           |
|                             | Increased sensitivity to NMDAR antagonist                                                                                       | Increased sensitivity to MK-801                                                                                                                       |
|                             | Reduction of psychotic agitation by haloperidol (17)                                                                            | Reduction of increased locomotor activity by haloperidol                                                                                              |
|                             | No improvement of PPI by haloperidol (18)                                                                                       | Improvement of PPI by haloperidol                                                                                                                     |
|                             | Reduction of aggression by clozapine (19)                                                                                       | Reduction of increased locomotor activity by clozapine                                                                                                |
|                             | Improvement of PPI by clozapine (20)                                                                                            | No improvement of PPI by clozapine                                                                                                                    |
|                             | Poor bilateral transfer (21)                                                                                                    | Improved motor coordination in the Rotarod test                                                                                                       |
| Physical signs              | Hypercortisolemia (22)                                                                                                          | Hypercortisolemia                                                                                                                                     |
|                             | Lower body mass index (BMI) (23),<br>no significant BMI difference in male (24), higher BMI in women (24)                       | Decreased body weight                                                                                                                                 |
| Physiology (EEG)            | Increased delta (25, 26), theta (25) power, Decreased alpha (25, 26), increased<br>gamma power (27), decreased gamma power (28) | Increased Theta wave, decreased Gamma wave                                                                                                            |
| Cortical Thickness          | Reduction in frontal lobe and temporal cortex (29), normal (20)                                                                 | Decreased cortical thickness in PrL and V1                                                                                                            |
| Cortical Cell density       | Increase (50, 51), decrease (52, 53), normal (27, 31)                                                                           | Decrease                                                                                                                                              |
| Hippocampus Volume          | Decrease in bilateral volume (32), Decrease in total volume (33)                                                                | Tendency to be large (data not shown)                                                                                                                 |
| Parvalbumin                 | Decrease in hippocampus (34) , PFC (35)                                                                                         | Decreased in hippocampus , PFC                                                                                                                        |
| GAD67                       | Decrease in hippocampus (36), increase in DLPFC (37)                                                                            | Decreased in hippocampus                                                                                                                              |
| Myelination/oligodendrocyte | Decreased CNPase (40), decrease myeline water fraction (5)                                                                      | Decreased CNPase, MBP was decreased                                                                                                                   |
| Astrocytes                  | Increased GFAP (39, 47), increased S100beta (41, 42, 43, 44)<br>decreased GFAP (38)                                             | Increased GFAP, increased S100beta                                                                                                                    |
| Microglia                   | Increased activated microglia (45), microglia activation (46),                                                                  | No significant change in Iba-1 expression                                                                                                             |
| Dopamine receptor           | Decreased D1R in prefrontal (48)                                                                                                | Decreased D1R binding in dentate gyrus                                                                                                                |
|                             | Increased D2R in striatum (49)                                                                                                  | No significant change in D2R binding                                                                                                                  |

References and notes

- (1) Tandon R, Keshavan MS, Nasrallah HA. Schizophrenia, "Just the Facts" : what we know in 2008 part 1: overview. Schizophr. Res. 2008; 100: 4–19.
- (2) Keshavan MS, Nasrallah HA, Tandon R. Schizophrenia, 「Just the Facts」 6. Moving ahead with the schizophrenia concept: from the elephant to the mouse. Schizophr. Res. 2011; 127: 3–13.
- (3) Powell CM, Miyakawa T. Schizophrenia–relevant behavioral testing in rodent models: a uniquely human disorder? Biol. Psychiatry. 2006; 59: 1198–1207.
- (4) Takagi T, Jin W, Taya K, Watanabe G, Mori K, Ishii S. Schnurri-2 mutant mice are hypersensitive to stress and hyperactive. Brain Res. 2006; 1108: 88–97.
- (5) The decreased pain sensitivity in these mice is consistent with reports showing that individuals with schizophrenia are less sensitive to physical pain than unaffected individuals (6).
- (6) Dworkin RH. Pain insensitivity in schizophrenia: a neglected phenomenon and some implications. Schizophr Bull. 1994; 20: 235–248.

(7) Shn-2 KO mice were more mobile than wild type controls in the Porsolt forced swim test (Supplementary Figure 2f). We also performed the sucrose preference test, in which a reduced preference for sucrose is considered to represent anhedonia or depression-like behavior (8). Shn-2 KO mice showed a significantly lower preference for sucrose, which suggests increased depression-like behavior (Figure 8n). Anhedonia is a hallmark of schizophrenia (9). Many strains of schizophrenia model mice, including calcineurin KO mice (10), NR2A KO mice (11), and nNOS KO mice (12), appear to show a reduction in depression-like behavior during the forced swim test. However, these mice are not necessarily less sensitive to stress. Rather, this difference may reflect their hyperactive phenotype and/or their increased sensitivity to stress. It should be noted that depression is not included in the DSM IV diagnostic criteria for schizophrenia, although depressive symptoms are common throughout the course of the illness (13). Schizophrenic patients are likely to comprise several biologically distinct heterogeneous populations, which include patients with or without high levels of depression. Clearly, the characteristics of Shn-2 KO mice do not mimic those of the entire schizophrenic population, but rather those of a specific subset of patients. In this regard, the depression-related behavioral abnormalities shown by Shn-2 KO mice may not be inconsistent with the idea that they represent an animal model of schizophrenia.

(8) Nestler EJ, Hyman SE. Animal models of neuropsychiatric disorders. *Nature Neuroscience*. 2010; 13: 1161–1169.

(9) Der-Avakian A, Markou A. The neurobiology of anhedonia and other reward-related deficits. *Trends in Neurosciences*. 2012; 35: 68–77.

(10) Miyakawa T, Leiter LM, Gerber DJ, Gainetdinov RR, Sotnikova TD, Zeng H et al.. Conditional calcineurin knockout mice exhibit multiple abnormal behaviors related to schizophrenia. *Proc Natl Acad Sci U S A*. 2003; 100: 8987–8992.

(11) Boyce-Rustay JM, Holmes A. Genetic Inactivation of the NMDA Receptor NR2A Subunit has Anxiolytic- and Antidepressant-Like Effects in Mice. *Neuropsychopharmacology*. 2006; 31: 2405–2414.

(12) Tanda K, Nishi A, Matsuo N, Nakanishi K, Yamasaki N, Sugimoto T et al.. Abnormal social behavior, hyperactivity, impaired remote spatial memory, and increased D1-mediated dopaminergic signaling in neuronal nitric oxide synthase knockout mice. *Mol Brain*. 2009;2:19.

(13) Buckley PF, Miller BJ, Lehrer DS, Castle DJ. Psychiatric Comorbidities and Schizophrenia. *Schizophr Bull*. 2009; 35: 383–402.

(14) Shn-2 KO mice spent a significantly longer period of time in the open arm during the elevated plus maze test (Supplementary Figure 2c), suggesting decreased anxiety-like behavior. However, there was no significant difference in the anxiety-like behavior in the light/dark transition test between genotypes (Supplementary Figure 2d). During the elevated plus maze test, Shn-2 KO mice spent more time in the open arms and entered the open arms more frequently, which is usually considered a sign of decreased anxiety-like behavior. However, this behavior may simply be attributable to locomotor hyperactivity, and their anxiety-like behavior per se may not differ from that shown by their wild type littermates (it may even be increased). This interpretation stems from our previous findings that: 1) plasma corticosterone levels were significantly greater in KO mice subjected to restraint stress; 2) KO mice subjected to an unfamiliar environment showed behaviors indicative of heightened anxiety, such as backtracking, freezing, stretching, and escaping; and 3) the center stay time in the open field test, a frequently used index of anxiety-like behavior, decreased in Shn-2 KO mice (4). Indeed, plasma corticosterone levels were significantly higher in these mice than in the controls after the elevated plus maze test (Supplementary Figure 2e). Increased time spent in the open arms is sometimes interpreted as “panic-like escaping behavior” in mice showing increased anxiety-like behavior (10, 15), including forebrain-specific calcineurin KO mice, which we previously proposed as an animal model for schizophrenia. It should be noted that anxiety is common throughout the course of the illness (13), although anxiety is not included in the DSM IV diagnostic criteria for schizophrenia. Schizophrenic patients are likely to comprise several biologically distinct heterogeneous populations, which include patients with or without high levels of anxiety. Obviously, the characteristics of Shn-2 KO mice may not mimic those of the entire schizophrenic population, but rather those of a specific subset of patients. In this regard, the anxiety-like behavioral abnormalities shown by Shn-2 KO mice may not be inconsistent with the idea that they represent an animal model of schizophrenia and could be potentially interesting.

(15) Holmes A, Parmigiani S, Ferrari PF, Palanza P, Rodgers RJ. Behavioral profile of wild mice in the elevated plus-maze test for anxiety. *Physiol. Behav*. 2000; 71: 509–516.

(16) Seedat S, Fritelli V, Oosthuizen P, Emsley RA, Stein DJ. Measuring Anxiety in Patients with Schizophrenia. *The Journal of Nervous and Mental Disease*. 2007; 195: 320–324.

(17) Villari V, Rocca P, Fonzo V, Montemagni C, Pandullo P, Bogetto F. Oral risperidone, olanzapine and quetiapine versus haloperidol in psychotic agitation. *Prog. Neuropsychopharmacol. Biol. Psychiatry*. 2008; 32: 405–413.

(18) Wynn JK, Green MF, Sprock J, Light GA, Widmark C, Reist C et al.. Effects of Olanzapine, Risperidone and Haloperidol on Preactivation Inhibition in Schizophrenia Patients: A Double-Blind, Randomized Controlled Trial. *Schizophr Res*. 2007; 95: 134–142.

(19) Frogley C, Taylor D, Dickens G, Picchioni M. A systematic review of the evidence of clozapine’s anti-aggressive effects. *Int. J. Neuropsychopharmacol*. 2012; 15: 1351–1371.

(20) Kumari V, Soni W, Sharma T. Normalization of information processing deficits in schizophrenia with clozapine. *Am J Psychiatry*. 1999; 156: 1046–1051.

(21) Mandal MK, Singh SK, Asthana HS, Srivastava P. Bilateral transfer deficit in schizophrenia. *Comprehensive Psychiatry*. 1992; 33: 319–324.

(22) Altamura AC, Boin F, Maes M. HPA axis and cytokines dysregulation in schizophrenia: potential implications for the antipsychotic treatment. *Eur Neuropsychopharmacol*. 1999; 10: 1–4.

(23) Sørensen HJ, Mortensen EL, Reinisch JM, Mednick SA. Height, weight and body mass index in early adulthood and risk of schizophrenia. *Acta Psychiatrica Scandinavica*. 2006; 114: 49–54.

(24) Allison DB, Fontaine KR, Heo M, Mentore JL, Cappelleri JC, Chandler LP et al.. The distribution of body mass index among individuals with and without schizophrenia. *J Clin Psychiatry*. 1999; 60: 215–220.

(25) Sponheim SR, Clementz BA, Iacono WG, Beiser M. Resting EEG in first-episode and chronic schizophrenia. *Psychophysiology*. 1994; 31: 37–43.

(26) Wada Y, Takizawa Y, Kitazawa S, Jiang ZY, Yamaguchi N. Quantitative EEG analysis at rest and during photic stimulation in drug-naïve patients with first-episode paranoid schizophrenia. *Eur Arch Psychiatry Clin Neurosci*. 1994; 244: 247–251.

(27) Moran ZD, Williams TJ, Bachman P, Nuechterlein KH, Subotnik KL, Yee CM. Spectral decomposition of P50 suppression in schizophrenia during concurrent visual processing. *Schizophrenia Research*. 2012; 140: 237–242.

(28) Haig AR, Gordon E, De Pascalis V, Meares RA, Bahramali H, Harris A. Gamma activity in schizophrenia: evidence of impaired network binding? *Clin Neurophysiol*. 2000; 111: 1461–1468.

(29) Goldman AL, Pezawas L, Doz P, Mattay VS, Fischl B, Verchinski BA et al.. Widespread Reductions of Cortical Thickness in Schizophrenia and Spectrum Disorders and Evidence of Heritability. *Arch Gen Psychiatry*. 2009; 66: 467–477.

(30) Smiley JF, Konnova K, Bleiwas C. Cortical thickness, neuron density and size in the inferior parietal lobe in schizophrenia. *Schizophr. Res*. 2012; 136: 43–50.

(31) Analyses of cortical cell density in patients with schizophrenia have yielded conflicting results. This may be due to differences in the experimental methods used and the cortical regions examined in these studies. Two methods are used for cell-counting: a two-dimensional (2D) method and a three-dimensional (3D) method. Previous studies using the 2D method show decreased neuron density in the cortex of patients with schizophrenia, whereas studies using the 3D method seem to suggest the opposite. Also, the studies that failed to show a reduction in cell density focused on dorsolateral areas, such as Brodmann’s area (BA) 9 or 47. By contrast, cortical cell density appears to decrease in the BA 10 area of schizophrenic brains. Our own study used the 2D method to examine cell density in the medial prefrontal cortex, which corresponds to BA 32 and a part of BA10.

(32) Nelson MD, Saykin AJ, Flashman LA, Riordan HJ. Hippocampal volume reduction in schizophrenia as assessed by magnetic resonance imaging: a meta-analytic study. *Arch. Gen. Psychiatry*. 1998; 55: 433–440.

(33) Koolschijn PCMP, van Haren NEM, Cahn W, Schnack HG, Janssen J, Klumpers F et al.. Hippocampal volume change in schizophrenia. *J Clin Psychiatry*. 2010; 71: 737–744.

(34) Zhang ZJ, Reynolds GP. A selective decrease in the relative density of parvalbumin-immunoreactive neurons in the hippocampus in schizophrenia. *Schizophr. Res*. 2002; 55: 1–10.

(35) Reynolds GP, Beasley CL. GABAergic neuronal subtypes in the human frontal cortex—development and deficits in schizophrenia. *J. Chem. Neuroanat*. 2001; 22: 95–100.

(36) Benes FM, Lim B, Matzilevich D, Walsh JP, Subburaju S, Minns M. Regulation of the GABA cell phenotype in hippocampus of schizophrenics and bipolars. *Proc. Natl. Acad. Sci. U.S.A*. 2007; 104: 10164–10169.

(37) Dracheva S, Elhakem SL, McGurk SR, Davis KL, Haroutunian V. GAD67 and GAD65 mRNA and protein expression in cerebrocortical regions of elderly patients with schizophrenia. *Journal of Neuroscience Research*. 2004; 76: 581–592.

(38) Steffek AE, McCullumsmith RE, Haroutunian V, Meador-Woodruff JH. Cortical expression of glial fibrillary acidic protein and glutamine synthetase is decreased in schizophrenia. *Schizophrenia Research*. 2008; 103: 71–82.

(39) Pennington K, Dicker P, Dunn MJ, Cotter DR. Proteomic analysis reveals protein changes within layer 2 of the insular cortex in schizophrenia. *Proteomics*. 2008; 8: 5097–5107.

- (40) Flynn SW, Lang DJ, Mackay AL, Goghari V, Vavasour IM, Whittall KP et al.. Abnormalities of myelination in schizophrenia detected in vivo with MRI, and post-mortem with analysis of oligodendrocyte proteins. *Mol. Psychiatry*. 2003; 8: 811–20.
- (41) Rothermundt M, Ponath G, Arolt V. S100B in schizophrenic psychosis. *Int. Rev. Neurobiol.* 2004; 59: 445–470.
- (42) Steiner J, Bernstein H-G, Bielau H, Farkas N, Winter J, Dobrowolny H, et al. S100B-immunopositive glia is elevated in paranoid as compared to residual schizophrenia: a morphometric study. *J Psychiatr Res.* 2008; 42: 868–876.
- (43) Rothermundt M, Ahn JN, Jörgens S. S100B in schizophrenia: an update. *Gen. Physiol. Biophys.* 2009; 28 Spec No Focus: F76–81.
- (44) Zhang XY, Xiu MH, Song C, Chen DC, Wu GY, Haile CN, et al. Increased serum S100B in never-medicated and medicated schizophrenic patients. *J Psychiatr Res.* 2010; 44: 1236–1240.
- (45) Monji A, Kato T, Kanba S. Cytokines and schizophrenia: Microglia hypothesis of schizophrenia. *Psychiatry Clin. Neurosci.* 2009 6; 63: 257–265.
- (46) Bayer TA, Buslei R, Havas L, Falkai P. Evidence for activation of microglia in patients with psychiatric illnesses. *Neurosci. Lett.* 1999; 271: 126–128.
- (47) Toro CT, Hallak JEC, Dunham JS, Deakin JFW. Glial fibrillary acidic protein and glutamine synthetase in subregions of prefrontal cortex in schizophrenia and mood disorder. *Neuroscience Letters.* 2006; 404: 276–281.
- (48) Okubo Y, Suhara T, Suzuki K, Kobayashi K, Inoue O, Terasaki O et al.. Decreased prefrontal dopamine D1 receptors in schizophrenia revealed by PET. *Nature.* 1997; 385: 634–636.
- (49) Pérez V, Catafau AM, Corripio I, Martín JC, Alvarez E. Preliminary evidence of striatal D2 receptor density as a possible biological marker of prognosis in naive schizophrenic patients. *Prog. Neuropsychopharmacol. Biol. Psychiatry.* 2003; 27: 767–770.
- (50) Selemon LD, Rajkowska G, Goldman-Rakic PS. Abnormally high neuronal density in the schizophrenic cortex. A morphometric analysis of prefrontal area 9 and occipital area 17. *Arch. Gen. Psychiatry.* 1995; 52: 805–818; discussion 819–820.
- (51) Selemon LD, Rajkowska G, Goldman-Rakic PS. Elevated neuronal density in prefrontal area 46 in brains from schizophrenic patients: Application of a three-dimensional, stereologic counting method. *The Journal of Comparative Neurology.* 1998; 392: 402–412.
- (52) Benes FM, Davidson J, Bird ED. Quantitative cytoarchitectural studies of the cerebral cortex of schizophrenics. *Arch. Gen. Psychiatry.* 1986; 43: 31–35.
- (53) Benes FM, Vincent SL, Todtenkopf M. The density of pyramidal and nonpyramidal neurons in anterior cingulate cortex of schizophrenic and bipolar subjects. *Biological Psychiatry.* 2001; 50: 395–406.
